# Supplementary material for: Pd/Cu-catalyzed cascade Heck-type reactions of alkenyl halides with terminal alkynes toward substituted pyrrolidine analogues
Source: Royal Society of Chemistry journal article supplement (doi:10.1039/d3ob00740e), 2023-01-01

# Supplementary Information

## **Pd/Cu-Catalyzed Cascade Heck-Type Reactions of Alkenyl Halides with Terminal Alkynes toward Substituted Pyrrolidine Analogues**

Shiji Xu<sup>a</sup>, Qiang Wang<sup>a</sup>, Jing Sun<sup>a</sup>, Ying, Han<sup>a</sup>, Weiming Hu<sup>b\*</sup>, Lei Wang<sup>a\*</sup> Chao-Guo Yan<sup>a\*</sup>

<sup>a</sup> School of Chemistry & Chemical Engineering, Yangzhou University, 225002, Yangzhou, P. R. China; E-mail: lei.wang@yzu.edu.cn, cgyan@yzu.edu.cn

<sup>b</sup> Jiangsu Key Laboratory of Function Control Technology for Advanced Materials, School of Environmental and Chemical Engineering, Jiangsu Ocean University, Lianyungang 222005, Jiangsu, China. E-mail: huweiming@jou.edu.cn

### **Table of Contents**

|                                          |     |
|------------------------------------------|-----|
| 1. General Information.....              | S1  |
| 2. Synthesis and Reaction .....          | S2  |
| 3. Characterization Data.....            | S5  |
| 4. Single Crystal X-Ray Diffraction..... | S37 |
| 5. References.....                       | S39 |
| 6. Copies of NMR Spectra.....            | S39 |

## 1. General Information

Unless otherwise noted, all reactions were carried out under argon atmosphere; materials obtained from commercial suppliers were used directly without further purification.  $^1\text{H}$  NMR spectra,  $^{13}\text{C}$  NMR spectra, and  $^{19}\text{F}$  NMR spectra were recorded on an Agilent 400 or on a Bruker 400 MHz spectrometer in  $\text{CDCl}_3$ . NMR experiments are reported in  $\delta$  units, parts per million (ppm), and were referenced to  $\text{CDCl}_3$  ( $d$  7.26 or 77.0 ppm) as the internal standard. The data is being reported as (s = singlet, d = doublet, dd = doublet of doublet, t = triplet, m = multiplet or unresolved, br = broad signal, coupling constant (s) in Hz, integration). All the solvents were used directly without further purification. Reactions were monitored by thin layer chromatography (TLC) using silicycle pre-coated silica gel plates. Flash column chromatography was performed on silica gel 60 (particle size 300-400 mesh ASTM, purchased from Yantai, China) and eluted with petroleum ether/ethyl acetate. Copies of NMR were processed with MestReNova Software. All melting points were uncorrected.

## 2. Synthesis and Reaction

### 2.1 General Procedure for the Synthesis of Pyrrolidines 3

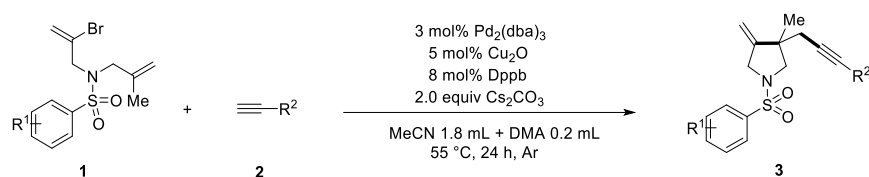

A sealed tube equipped with a magnetic stir bar was charged with 2-bromo-1,6-diene **1** (0.30 mmol, 1.0 equiv.), terminal alkynes **2** (0.60 mmol, 2.0 equiv.), Pd<sub>2</sub>(dba)<sub>3</sub> (8.2 mg, 0.009 mmol, 0.03 equiv.), Cu<sub>2</sub>O (2.2 mg, 0.015 mmol, 0.05 equiv.), 1,4-bis(diphenylphosphino)butane (10.2 mg, 0.024 mmol, 0.08 equiv.), Cs<sub>2</sub>CO<sub>3</sub> (195.5 mg, 0.60 mmol, 2.0 equiv.) and solvent (2.0 mL). The tube was sealed with a Teflon lined cap. Degassed solvent and backfilled with argon for 3 times at -78 °C. The reaction mixture was stirred at 55 °C for 24 h. After completion of the reaction (monitored by TLC), the mixture was concentrated in vacuum and the residue was purified by flash column chromatography on silica gel with petroleum ether-ethyl acetate as eluent to give the desired product.

### 2.2 Table S1. Optimization of Reaction Conditions<sup>a</sup>

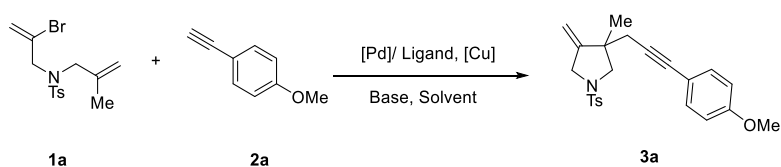

| Entry | [Pd]                               | [Cu]              | Ligand           | Solvent | Yield (%) <sup>b</sup> |
|-------|------------------------------------|-------------------|------------------|---------|------------------------|
| 1     | Pd <sub>2</sub> (dba) <sub>3</sub> | -                 | Dpephos          | MeCN    | 10                     |
| 2     | Pd <sub>2</sub> (dba) <sub>3</sub> | -                 | Xphos            | MeCN    | 27                     |
| 3     | Pd <sub>2</sub> (dba) <sub>3</sub> | -                 | Xantphos         | MeCN    | N.R                    |
| 4     | Pd <sub>2</sub> (dba) <sub>3</sub> | -                 | PPh <sub>3</sub> | MeCN    | N.R                    |
| 5     | Pd <sub>2</sub> (dba) <sub>3</sub> | -                 | Dppf             | MeCN    | N.R                    |
| 6     | Pd <sub>2</sub> (dba) <sub>3</sub> | -                 | Dppb             | MeCN    | 31                     |
| 7     | Pd <sub>2</sub> (dba) <sub>3</sub> | CuI               | Dppb             | MeCN    | 13                     |
| 8     | Pd <sub>2</sub> (dba) <sub>3</sub> | CuO               | Dppb             | MeCN    | 69                     |
| 9     | Pd <sub>2</sub> (dba) <sub>3</sub> | Cu <sub>2</sub> O | Dppb             | MeCN    | 70                     |
| 10    | Pd <sub>2</sub> (dba) <sub>3</sub> | Cu <sub>2</sub> O | Dppb             | Toluene | 17                     |

|                   |                                       |                   |      |      |    |
|-------------------|---------------------------------------|-------------------|------|------|----|
| 11                | Pd <sub>2</sub> (dba) <sub>3</sub>    | Cu <sub>2</sub> O | Dppb | DCE  | 42 |
| 12                | Pd <sub>2</sub> (dba) <sub>3</sub>    | Cu <sub>2</sub> O | Dppb | THF  | 10 |
| 13 <sup>c</sup>   | Pd <sub>2</sub> (dba) <sub>3</sub>    | Cu <sub>2</sub> O | Dppb | M.S. | 70 |
| 14 <sup>e</sup>   | Pd <sub>2</sub> (dba) <sub>3</sub>    | Cu <sub>2</sub> O | Dppb | M.S. | 74 |
| 15 <sup>c,d</sup> | Pd(OAc) <sub>2</sub>                  | Cu <sub>2</sub> O | Dppb | M.S. | 59 |
| 16 <sup>c,d</sup> | PdCl <sub>2</sub>                     | Cu <sub>2</sub> O | Dppb | M.S. | 62 |
| 17 <sup>c,d</sup> | Pd(MeCN) <sub>2</sub> Cl <sub>2</sub> | Cu <sub>2</sub> O | Dppb | M.S. | 10 |
| 18 <sup>c,d</sup> | Pd(acac) <sub>2</sub>                 | Cu <sub>2</sub> O | Dppb | M.S. | 39 |

<sup>a</sup> Reaction conditions: **1a** (0.2 mmol, 1.0 equiv.), **2a** (0.4 mmol, 2.0 equiv.), Cs<sub>2</sub>CO<sub>3</sub> (2.0 equiv.), 3 mol% of Pd catalyst, 8 mol% of Ligand, and 5 mol% of Cu catalyst in the solvent (2.0 mL) at 55 °C under Ar for 24 h. <sup>b</sup> Isolated yield. <sup>c</sup> M.S.= MeCN : DMA (2.0 mL, 9:1 ratio). <sup>d</sup> 6 mol% of Pd catalyst. <sup>e</sup> **1a** (0.3 mmol, 1.0 equiv.), **2a** (0.6 mmol, 2.0 equiv.), Cs<sub>2</sub>CO<sub>3</sub> (2.0 equiv.), 3 mol% of Pd<sub>2</sub>(dba)<sub>3</sub>, 8 mol% of Dppb, and 5 mol% of Cu<sub>2</sub>O in the dry MeCN/dry DMA (2.0 mL, 9:1 ratio) at 55 °C under Ar for 24 h; N.R., no reaction.

### 2.3 Gram-Scale Synthesis of **3a**

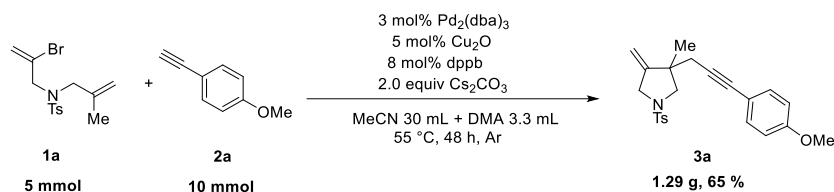

An oven-dried 100 mL Schlenk tube equipped with a magnetic stir bar was charged with Pd<sub>2</sub>(dba)<sub>3</sub> (137.4 mg, 0.15 mmol, 0.03 equiv.), Cu<sub>2</sub>O (35.8 mg, 0.25 mmol, 0.05 equiv.), 1,4-bis(diphenylphosphino)butane (170.6 mg, 0.40 mmol, 0.08 equiv.), Cs<sub>2</sub>CO<sub>3</sub> (3.2582 g, 10.0 mmol, 2.0 equiv.), **1a** (1.7213 g, 5 mmol), **2a** (1.3216 g, 10 mmol), dry MeCN (30.0 mL) and dry *N,N*-dimethylacetamide (3.3 mL) were added sequentially. Degassed solvent and backfilled with argon for 3 times at -78 °C. The reaction mixture was stirred at 55 °C for 48 h. After completion of the reaction (monitored by TLC), the mixture was concentrated in vacuum and the residue was purified by flash column chromatography on silica gel with petroleum ether-ethyl acetate as eluent to give the desired product **3a** 1.29g in 65% yield.

### 2.4 General Procedure for Preparation of Substrates **1a-1l**.<sup>1-4</sup>

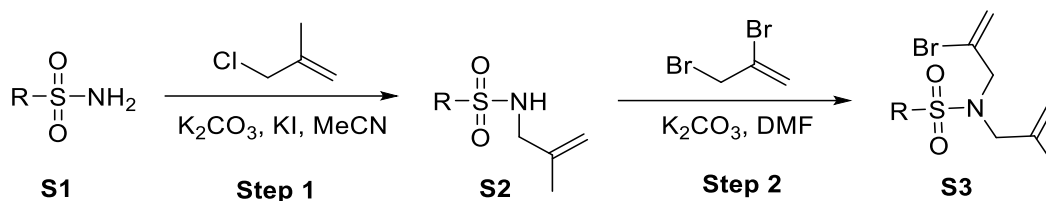

**Step 1** To a solution of **S1** (1.2 equiv.),  $\text{K}_2\text{CO}_3$  (2.0 equiv.) and  $\text{KI}$  (0.5 equiv.) in  $\text{CH}_3\text{CN}$  was added 3-chloro-2-methylpropene (1.0 equiv.) slowly. The reaction mixture was stirred at  $60\text{ }^\circ\text{C}$  for 12 h. After completion, the reaction was quenched with water, extracted with  $\text{EtOAc}$  for three times. The combined organic layer was washed with water and brine for three times, dried over anhydrous  $\text{Na}_2\text{SO}_4$ , and concentrated under reduced pressure.

**Step 2** The residue **S2** was dissolved in  $\text{DMF}$ ,  $\text{K}_2\text{CO}_3$  (2.0 equiv.) and 2,3-dibromopropene (1.2 equiv.) were added. The reaction mixture was stirred at room temperature for 2 h. After completion, it was diluted with water, extracted with  $\text{EtOAc}$  for three times, and washed with water and brine for three times, dried over anhydrous  $\text{Na}_2\text{SO}_4$ , and concentrated under reduced pressure. The residue was purified by flash chromatography on silica gel to afford target product **S3**.

## 2.5 Experimental Procedure for Synthesis of **5**<sup>5</sup>

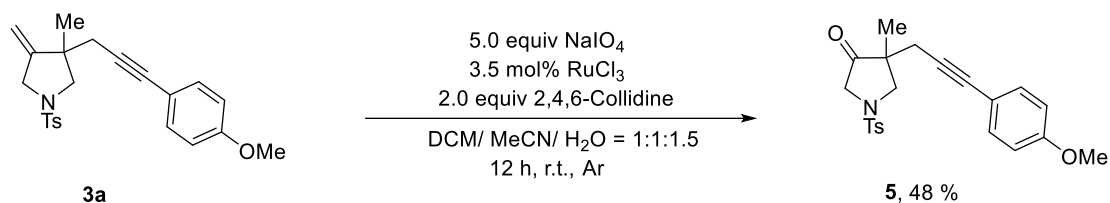

A dried round bottle flask equipped with a magnetic stir bar was charged with product **3a** (0.2 mmol, 1.0 equiv.) and 2.4 mL solvent ( $V_{\text{DCM}}:V_{\text{MeCN}} = 1:1$ ) under nitrogen. And then, 2,4,6-Collidine (48.5 mg, 0.4 mmol, 2.0 equiv.), water (1.8 mL), sodium periodate (215.9 mg, 1.0 mmol, 5.0 equiv.) and ruthenium (III) trichloride hydrate (1.5 mg, 0.007mmol, 3.5 mol%) were added in order. The reaction mixture was stirred at room temperature overnight. The resulting mixture was then diluted with water and extracted with  $\text{DCM}$  for three times. The organic extracts were combined, washed with brine and dried over  $\text{Na}_2\text{SO}_4$ . The mixture was concentrated in vacuum and the residue was purified by flash column chromatography on silica gel with petroleum ether-ethyl

acetate as eluent to give the desired product **5** (38.5 mg, 48%) as a yellow oil.

## 2.6 Experimental procedure for synthesis of **6**<sup>1</sup>

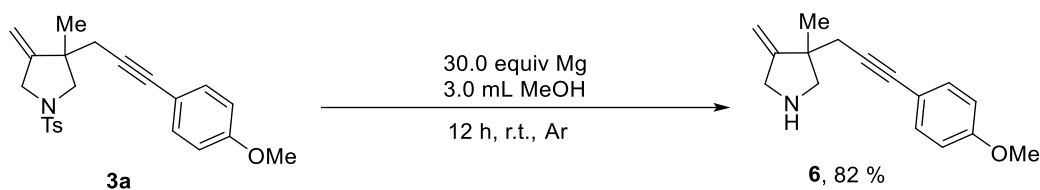

A dried round bottle flask equipped with a magnetic stir bar was charged with product **3a** (0.2 mmol, 1.0 equiv.), Mg turnings (145.9 mg, 6.0 mmol, 30.0 equiv.) and 3.0 mL MeOH under nitrogen. The reaction mixture was ultrasonicated for 5 minutes, and then stirred at room temperature overnight. The white suspension was treated with Et<sub>3</sub>N and filtered through a short pad of celite, washed with Et<sub>2</sub>O and MeOH. The filtrate was concentrated in vacuum and the residue was purified by flash column chromatography on silica gel with a gradient eluant of EA/MeOH (10:1) and Et<sub>3</sub>N to give the desired product **6** (39.6 mg, 82%) as a white oil.

## 3. Characterization Data

### *N*-(2-bromoallyl)-4-(*tert*-butyl)-*N*-(2-methylallyl)benzenesulfonamide (**1c**)

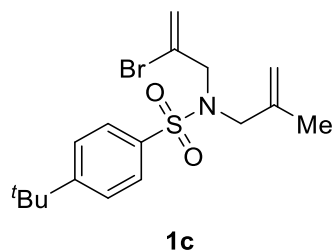

Flash column chromatography on a silica gel (ethyl acetate: petroleum ether, 20:1) gave the product **1c** (2.0g, 31% yield) as a white solid; m.p.: 70-73 °C.

<sup>1</sup>H NMR (CDCl<sub>3</sub>, 400 MHz)  $\delta$  7.76 (d,  $J$  = 8.8 Hz, 2H), 7.50 (d,  $J$  = 8.8 Hz, 2H), 5.75-5.74 (m, 1H), 5.55-5.54 (m, 1H), 4.92 (s, 1H), 4.83 (s, 1H), 4.04 (s, 2H), 3.82 (s, 2H), 1.63 (s, 3H), 1.33 (s, 9H);

<sup>13</sup>C NMR (CDCl<sub>3</sub>, 100 MHz)  $\delta$  156.5, 139.5, 137.1, 127.7, 127.2, 125.9, 119.4, 115.4, 54.0, 53.5, 35.1, 31.0, 19.8;

**HRMS** Calcd (ESI)  $m/z$  for  $C_{17}H_{24}BrNNaO_2S [M + Na]^+$ : 408.0603, found: 408.0597.

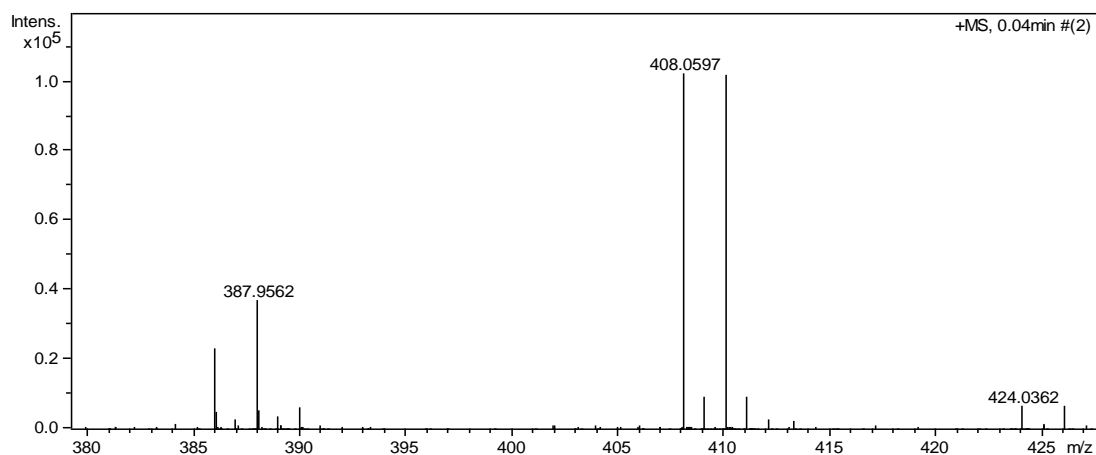

***N*-(2-bromoallyl)-2-methyl-*N*-(2-methylallyl)benzenesulfonamide (1d)**

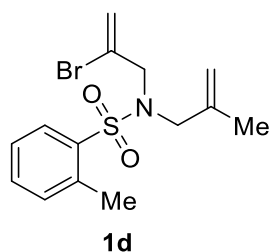

Flash column chromatography on a silica gel (ethyl acetate: petroleum ether, 20:1) gave the product **1d** (2.8g, 64% yield) as a yellow oil.

$^1H$  NMR ( $CDCl_3$ , 400 MHz)  $\delta$  7.91 (d,  $J = 8.0$  Hz, 1H), 7.37-7.34 (m, 1H), 7.23-7.19 (m, 2H), 5.69-5.68 (m, 1H), 5.47 (s, 1H), 4.87 (s, 1H), 4.81 (s, 1H), 3.99 (s, 2H), 3.83 (s, 2H), 2.54 (s, 3H), 1.49 (s, 3H);

$^{13}C$  NMR ( $CDCl_3$ , 100 MHz)  $\delta$  139.1, 137.8, 137.6, 132.8, 132.5, 130.1, 127.2, 125.9, 120.3, 115.7, 53.0, 52.3, 20.6, 19.6;

**HRMS** Calcd (ESI)  $m/z$  for  $C_{14}H_{18}BrNNaO_2S [M + Na]^+$ : 366.0134, found: 366.0123.

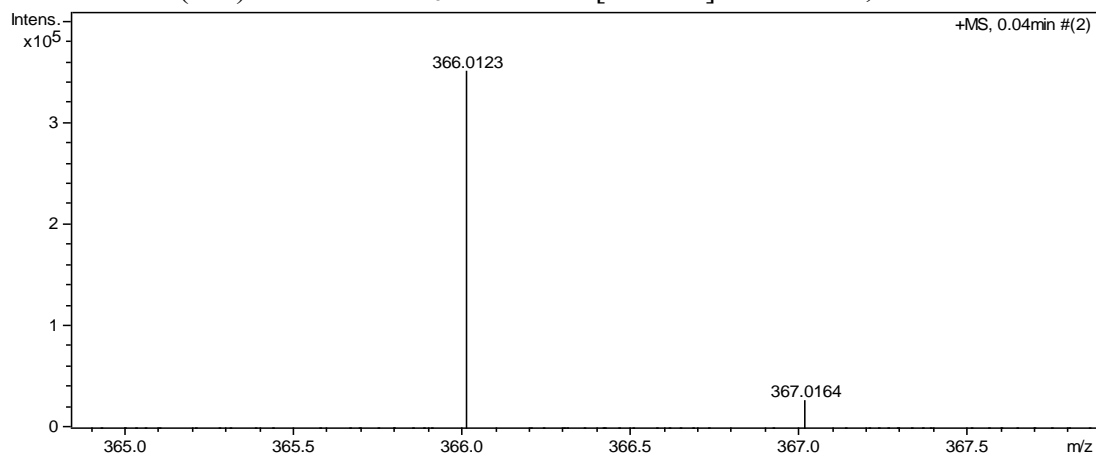

***N*-(2-bromoallyl)-4-chloro-*N*-(2-methylallyl)benzenesulfonamide (1f)**

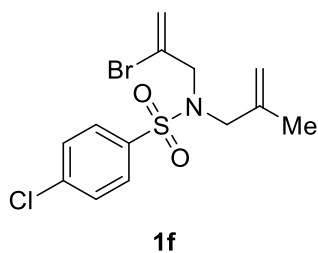

Flash column chromatography on a silica gel (ethyl acetate: petroleum ether, 20:1) gave the product **1f** (4.1g, 28% yield) as a yellow oil.

<sup>1</sup>H NMR (CDCl<sub>3</sub>, 400 MHz) δ 7.78 (d, *J* = 8.4 Hz, 2H), 7.47 (d, *J* = 8.8 Hz, 2H), 5.75-5.74 (m, 1H), 5.57-5.56 (m, 1H), 4.95 (s, 1H), 4.84 (s, 1H), 4.07 (s, 2H), 3.85 (s, 2H), 1.65 (s, 3H);

<sup>13</sup>C NMR (CDCl<sub>3</sub>, 100 MHz) δ 139.1 (2C), 139.0, 129.2, 128.8, 127.3, 120.2, 115.6, 53.8, 53.3, 19.9;

HRMS Calcd (ESI) *m/z* for C<sub>13</sub>H<sub>15</sub>BrClNNaO<sub>2</sub>S [M + Na]<sup>+</sup>: 385.9588, found: 385.9587.

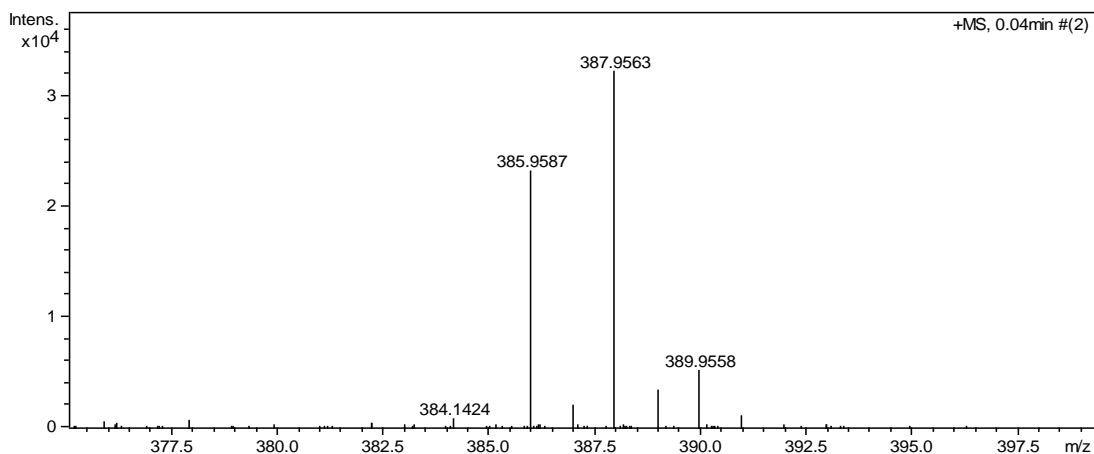

***N*-(2-bromoallyl)-*N*-(2-methylallyl)-4-(trifluoromethoxy)benzenesulfonamide (1h)**

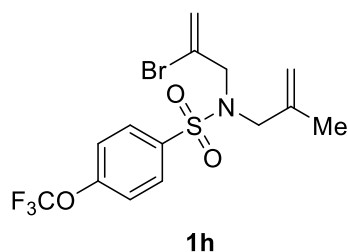

Flash column chromatography on a silica gel (ethyl acetate: petroleum ether, 20:1) gave the product **1h** (2.1g, 50% yield) as a yellow oil.



**<sup>1</sup>H NMR** (CDCl<sub>3</sub>, 400 MHz) δ 7.88 (d, *J* = 9.2 Hz, 2H), 7.30 (d, *J* = 9.2 Hz, 2H), 5.74-5.73 (m, 1H), 5.54-5.53 (m, 1H), 4.92 (s, 1H), 4.82 (s, 1H), 4.06 (s, 2H), 3.85 (s, 2H), 1.62 (s, 3H);

**<sup>13</sup>C NMR** (CDCl<sub>3</sub>, 100 MHz) δ 152.0, 139.0, 138.9, 129.4, 127.3, 120.8, 120.3, 120.2 (q, *J* = 257.9 Hz), 115.5, 53.8, 53.3, 19.8;

**<sup>19</sup>F NMR** (CDCl<sub>3</sub>, 376 MHz) δ -57.7;

**HRMS** Calcd (ESI) *m/z* for C<sub>14</sub>H<sub>15</sub>BrF<sub>3</sub>NNaO<sub>3</sub>S [M + Na]<sup>+</sup>: 435.9800, found: 435.9795.

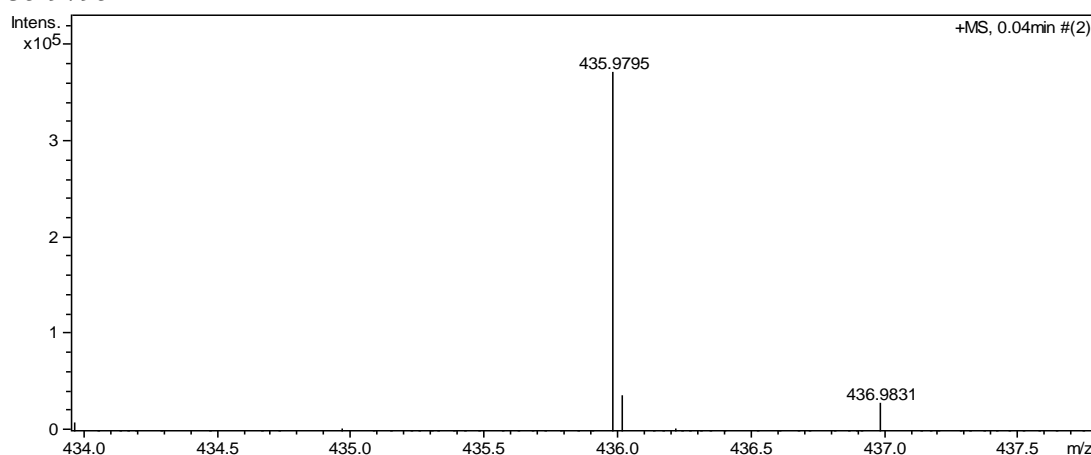

### ***N*-(2-bromoallyl)-*N*-(2-methylallyl)thiophene-2-sulfonamide (**1i**)**

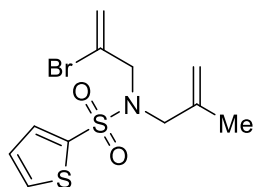

**1i**

Flash column chromatography on a silica gel (ethyl acetate: petroleum ether, 20:1) gave the product **1i** (2.5g, 59% yield) as a yellow oil.

**<sup>1</sup>H NMR** (CDCl<sub>3</sub>, 400 MHz) δ 7.56-7.55 (m, 2H), 7.06-7.04 (m, 1H), 5.77-5.76 (m, 1H), 5.55-5.54 (m, 1H), 4.91 (s, 1H), 4.84 (s, 1H), 4.03 (s, 2H), 3.81 (s, 2H), 1.64 (s, 3H);

**<sup>13</sup>C NMR** (CDCl<sub>3</sub>, 100 MHz) δ 140.5, 139.0, 132.0, 131.6, 127.2, 127.1, 119.7, 115.4, 54.2, 53.7, 19.7;

**HRMS** Calcd (ESI) *m/z* for C<sub>11</sub>H<sub>14</sub>BrNNaO<sub>2</sub>S<sub>2</sub> [M + Na]<sup>+</sup>: 357.9542, found: 357.9542.

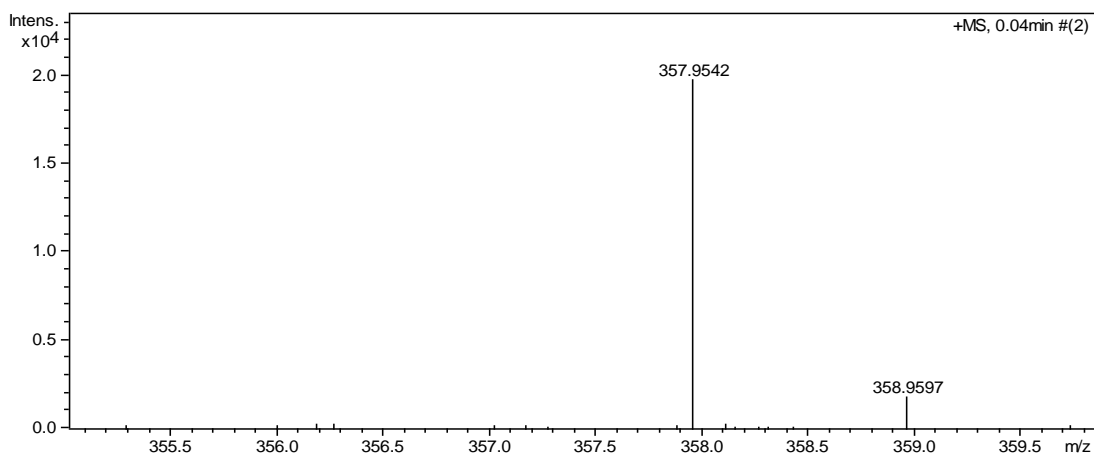

***N*-(2-bromoallyl)-4-methyl-*N*-(2-phenylallyl)benzenesulfonamide (**11**)**

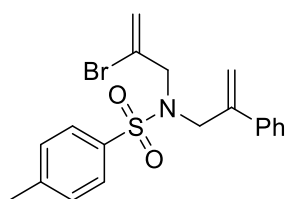

**11**

Flash column chromatography on a silica gel (ethyl acetate: petroleum ether, 20:1) gave the product **11** (0.3g, 18% yield) as a yellow solid; m.p.: 37-40 °C.

<sup>1</sup>H NMR (CDCl<sub>3</sub>, 400 MHz) δ 7.67-7.64 (m, 2H), 7.34-7.25 (m, 7H), 5.63 (s, 1H), 5.46-5.43 (m, 2H), 5.19 (s, 1H), 4.32 (s, 2H), 3.99 (s, 2H), 2.43 (s, 3H);

<sup>13</sup>C NMR (CDCl<sub>3</sub>, 100 MHz) δ 143.4, 141.9, 138.2, 136.5, 129.5, 128.3, 127.9, 127.3, 127.2, 126.3, 119.2, 116.9, 54.1, 51.4, 21.4;

HRMS Calcd (ESI) m/z for C<sub>19</sub>H<sub>20</sub>BrNNaO<sub>2</sub>S [M + Na]<sup>+</sup>: 428.0290, found: 428.0292.

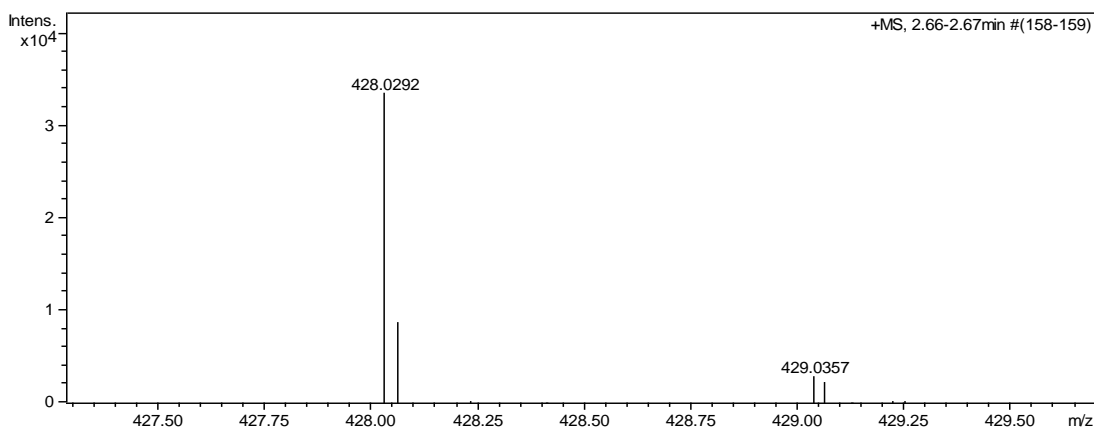

**3-(3-(4-Methoxyphenyl)prop-2-yn-1-yl)-3-methyl-4-methylene-1-tosylpyrrolidine**

**(3a)**

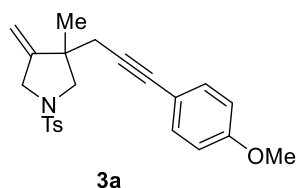

Flash column chromatography on a silica gel (ethyl acetate: petroleum ether, 9:1) gave the product **3a** (88.0mg, 74% yield) as a yellow solid; m.p.: 77-80 °C.

<sup>1</sup>H NMR (CDCl<sub>3</sub>, 400 MHz) δ 7.72 (d, *J* = 8.0 Hz, 2H), 7.31 (d, *J* = 8.0 Hz, 2H), 7.26 (d, *J* = 8.8 Hz, 2H), 6.81 (d, *J* = 8.8 Hz, 2H), 4.95-4.94 (m, 2H), 3.95-3.84 (m, 2H), 3.80 (s, 3H), 3.44 (d, *J* = 9.2 Hz, 1H), 3.02 (d, *J* = 9.6 Hz, 1H), 2.47-2.37 (m, 5H), 1.24 (s, 3H);

<sup>13</sup>C NMR (CDCl<sub>3</sub>, 100 MHz) δ 159.2, 150.7, 143.6, 132.9, 132.4, 129.6, 127.8, 115.4, 113.8, 106.4, 84.7, 82.3, 58.7, 55.2 (2C), 45.3, 30.0, 23.4, 21.5;

HRMS Calcd (ESI) *m/z* for C<sub>23</sub>H<sub>26</sub>NO<sub>3</sub>S [M + H]<sup>+</sup>: 396.1628, found: 396.1639.

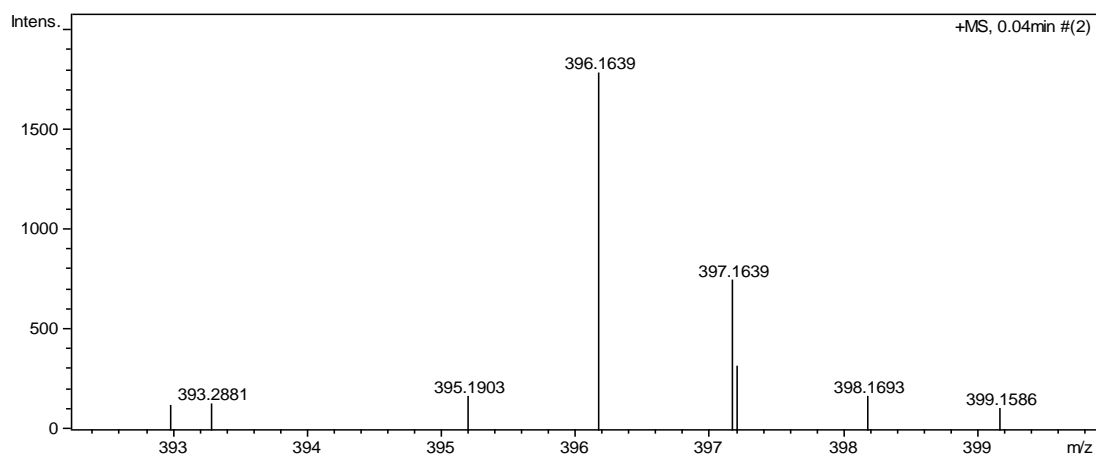

### 3-Methyl-4-methylene-3-(3-phenylprop-2-yn-1-yl)-1-tosylpyrrolidine (3b)

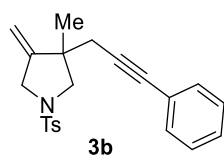

Flash column chromatography on a silica gel (ethyl acetate: petroleum ether, 9:1) gave the product **3b** (73.6 mg, 67% yield) as a yellow solid; m.p.: 47-49 °C.

<sup>1</sup>H NMR (CDCl<sub>3</sub>, 400 MHz) δ 7.72 (d, *J* = 8.0 Hz, 2H), 7.31-7.26 (m, 7H), 4.96-4.95 (m, 2H), 3.94-3.85 (m, 2H), 3.44 (d, *J* = 9.2 Hz, 1H), 3.03 (d, *J* = 9.6 Hz, 1H), 2.49-2.39 (m, 5H), 1.24 (s, 3H);

$^{13}\text{C}$  NMR ( $\text{CDCl}_3$ , 100 MHz)  $\delta$  150.5, 143.6, 132.4, 131.4, 129.6, 128.1, 127.7 (2C), 123.3, 106.4, 86.3, 82.5, 58.6, 52.2, 45.2, 29.9, 23.4, 21.4;

HRMS Calcd (ESI)  $m/z$  for  $\text{C}_{22}\text{H}_{23}\text{NNaO}_2\text{S}$   $[\text{M} + \text{Na}]^+$ : 388.1342, found: 388.1335.

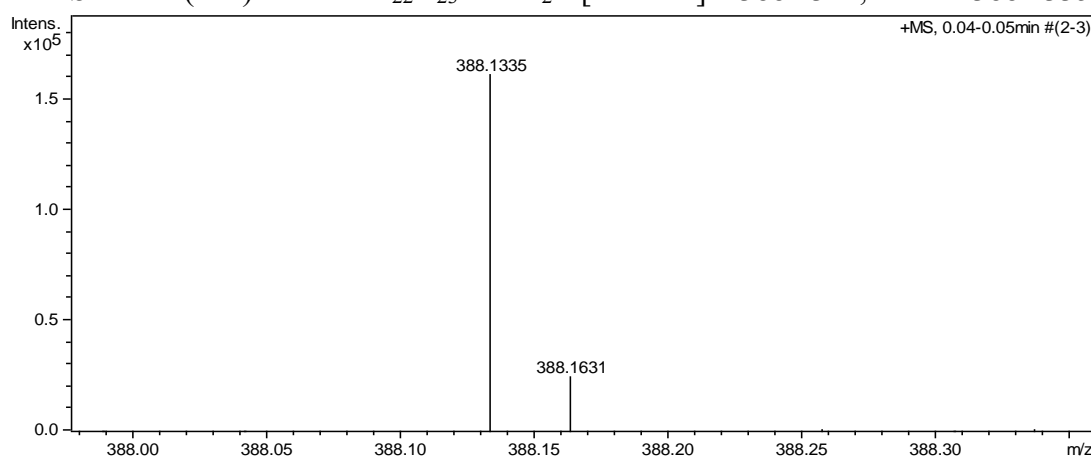

### 3-(3-(4-Ethylphenyl)prop-2-yn-1-yl)-3-methyl-4-methylene-1-tosylpyrrolidine (3c)

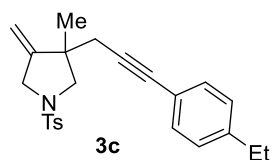

Flash column chromatography on a silica gel (ethyl acetate: petroleum ether, 15:1) gave the product **3c** (87.1 mg, 74% yield) as a yellow oil.

$^1\text{H}$  NMR ( $\text{CDCl}_3$ , 400 MHz)  $\delta$  7.72 (d,  $J = 8.4$  Hz, 2H), 7.32 (d,  $J = 8.0$  Hz, 2H), 7.24 (d,  $J = 8.0$  Hz, 2H), 7.11 (d,  $J = 8.4$  Hz, 2H), 4.96-4.94 (m, 2H), 3.95-3.85 (m, 2H), 3.43 (d,  $J = 9.6$  Hz, 1H), 3.03 (d,  $J = 9.2$  Hz, 1H), 2.63 (q,  $J = 7.6$  Hz, 2H), 2.48-2.38 (m, 5H), 1.24-1.21 (m, 6H);

$^{13}\text{C}$  NMR ( $\text{CDCl}_3$ , 100 MHz)  $\delta$  150.6, 144.2, 143.6, 132.4, 131.5, 129.6, 127.8, 127.7, 120.5, 106.4, 85.6, 82.6, 58.7, 52.3, 45.3, 30.0, 28.7, 23.5, 21.5, 15.4;

HRMS Calcd (ESI)  $m/z$  for  $\text{C}_{24}\text{H}_{27}\text{NNaO}_2\text{S}$   $[\text{M} + \text{Na}]^+$ : 416.1655, found: 416.1657.

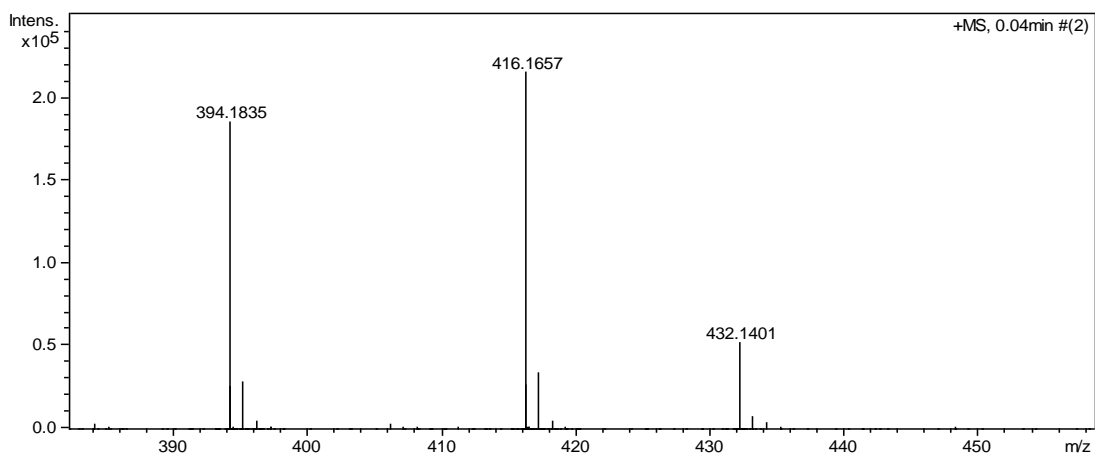

### 3-Methyl-4-methylene-3-(3-(4-propylphenyl)prop-2-yn-1-yl)-1-tosylpyrrolidine

**(3d)**

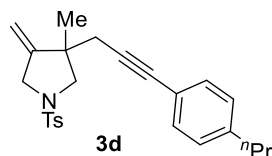

Flash column chromatography on a silica gel (ethyl acetate: petroleum ether, 15:1) gave the product **3d** (88.4 mg, 72% yield) as a yellow oil.

<sup>1</sup>H NMR (CDCl<sub>3</sub>, 400 MHz) δ 7.72 (d, *J* = 7.6 Hz, 2H), 7.31 (d, *J* = 8.0 Hz, 2H), 7.24 (d, *J* = 7.2 Hz, 2H), 7.09 (d, *J* = 7.6 Hz, 2H), 4.95 (s, 2H), 3.94-3.85 (m, 2H), 3.43 (d, *J* = 9.6 Hz, 1H), 3.03 (d, *J* = 9.6 Hz, 1H), 2.59-2.55 (m, 2H), 2.48-2.38 (m, 5H), 1.67-1.58 (m, 2H), 1.24 (s, 3H), 0.95-0.91 (m, 3H);

<sup>13</sup>C NMR (CDCl<sub>3</sub>, 100 MHz) δ 150.6, 143.6, 142.6, 132.4, 131.3, 129.6, 128.3, 127.8, 120.5, 106.4, 85.5, 82.6, 58.7, 52.2, 45.3, 37.8, 30.0, 24.3, 23.4, 21.5, 13.7;

HRMS Calcd (ESI) *m/z* for C<sub>25</sub>H<sub>29</sub>NNaO<sub>2</sub>S [M + Na]<sup>+</sup>: 430.1811, found: 430.1813.

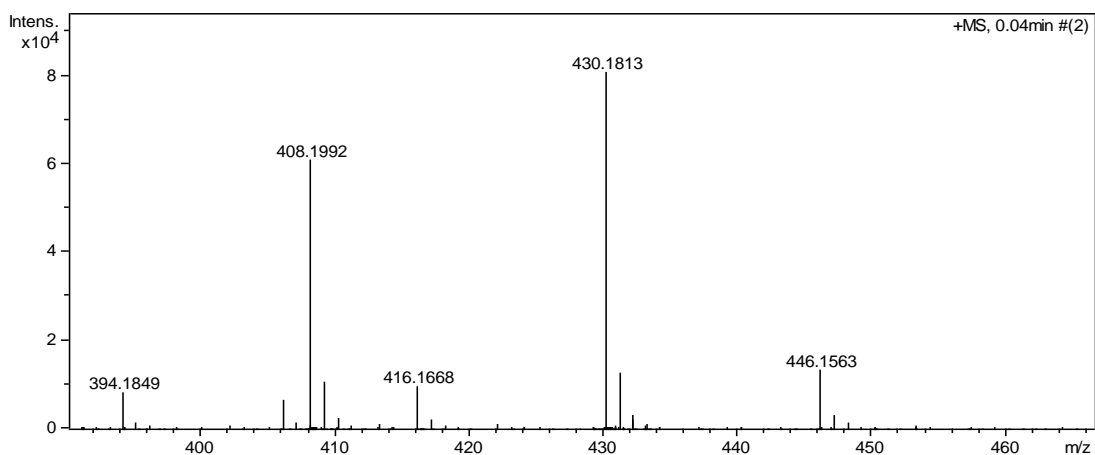

### 3-(3-(4-Butylphenyl)prop-2-yn-1-yl)-3-methyl-4-methylene-1-tosylpyrrolidine (3e)

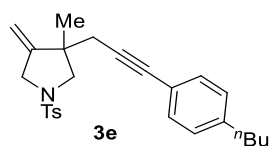

Flash column chromatography on a silica gel (ethyl acetate: petroleum ether, 15:1) gave the product **3e** (86.8 mg, 69% yield) as a yellow oil.

$^1\text{H NMR}$  ( $\text{CDCl}_3$ , 400 MHz)  $\delta$  7.72 (d,  $J = 8.4$  Hz, 2H), 7.32 (d,  $J = 8.4$  Hz, 2H), 7.23 (d,  $J = 8.0$  Hz, 2H), 7.09 (d,  $J = 8.0$  Hz, 2H), 4.96-4.95 (m, 2H), 3.95-3.85 (m, 2H), 3.43 (d,  $J = 9.6$  Hz, 1H), 3.03 (d,  $J = 9.2$  Hz, 1H), 2.61-2.57 (m, 2H), 2.48-2.38 (m, 5H), 1.62-1.58 (m, 2H), 1.39-1.30 (m, 2H), 1.24 (s, 3H), 0.94-0.91 (m, 3H);

$^{13}\text{C NMR}$  ( $\text{CDCl}_3$ , 100 MHz)  $\delta$  150.7, 143.6, 142.9, 132.5, 131.4, 129.6, 128.3, 127.8, 120.4, 106.4, 85.6, 82.7, 58.7, 52.3, 45.3, 35.5, 33.4, 30.0, 23.5, 22.2, 21.5, 13.9;

**HRMS** Calcd (ESI)  $m/z$  for  $\text{C}_{26}\text{H}_{31}\text{NNaO}_2\text{S}$   $[\text{M} + \text{Na}]^+$ : 444.1968, found: 444.1970.

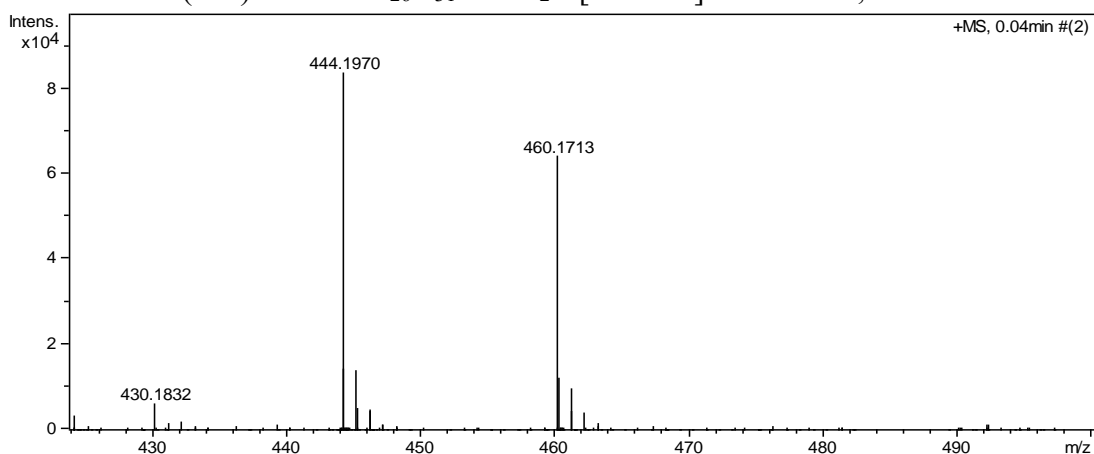

### 3-(3-([1,1'-Biphenyl]-4-yl)prop-2-yn-1-yl)-3-methyl-4-methylene-1-tosylpyrrolidine (3f)

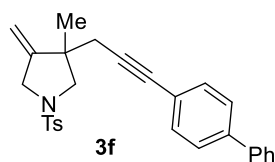

Flash column chromatography on a silica gel (ethyl acetate: petroleum ether, 10:1) gave the product **3f** (80.6 mg, 61% yield) as a yellow solid; m.p.: 106-109 °C.

$^1\text{H NMR}$  ( $\text{CDCl}_3$ , 400 MHz)  $\delta$  7.75 (d,  $J = 8.0$  Hz, 2H), 7.59 (d,  $J = 7.6$  Hz, 2H), 7.53 (d,  $J = 8.4$  Hz, 2H), 7.47-7.36 (m, 5H), 7.33 (d,  $J = 8.0$  Hz, 2H), 4.99-4.98 (m, 2H),

3.98-3.87 (m, 2H), 3.48 (d,  $J = 9.6$  Hz, 1H), 3.06 (d,  $J = 9.2$  Hz, 1H), 2.54-2.44 (m, 2H), 2.41 (s, 3H), 1.28 (s, 3H);

$^{13}\text{C}$  NMR ( $\text{CDCl}_3$ , 100 MHz)  $\delta$  150.6, 143.6, 140.6, 140.3, 132.5, 131.9, 129.6, 128.8, 127.8, 127.5, 126.9, 126.8, 122.3, 106.5, 87.1, 82.5, 58.7, 52.3, 45.3, 30.1, 23.5, 21.5;

HRMS Calcd (ESI)  $m/z$  for  $\text{C}_{28}\text{H}_{27}\text{NNaO}_2\text{S}$   $[\text{M} + \text{Na}]^+$ : 464.1655, found: 464.1656.

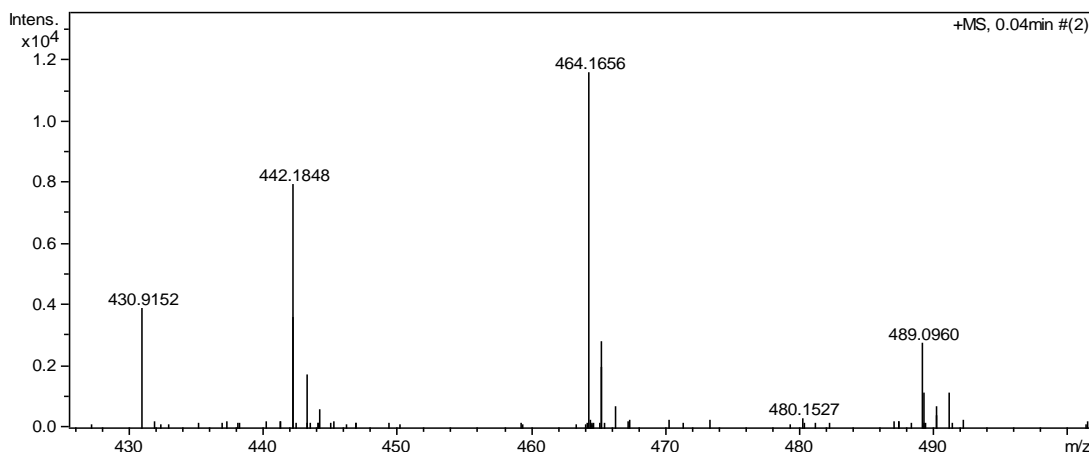

### 3-(3-(4-Fluorophenyl)prop-2-yn-1-yl)-3-methyl-4-methylene-1-

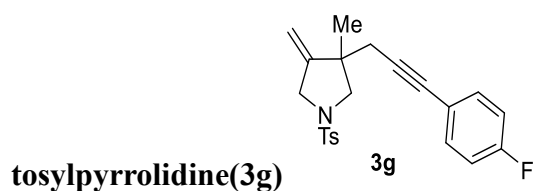

Flash column chromatography on a silica gel (ethyl acetate: petroleum ether, 11:1) gave the product **3g** (54.8 mg, 48% yield) as a brown solid; m.p.: 60-63 °C.

$^1\text{H}$  NMR ( $\text{CDCl}_3$ , 400 MHz)  $\delta$  7.72 (d,  $J = 8.0$  Hz, 2H), 7.32-7.28 (m, 4H), 6.99-6.95 (m, 2H), 4.97-4.94 (m, 2H), 3.96-3.91 (m, 1H), 3.87-3.83 (m, 1H), 3.44 (d,  $J = 9.2$  Hz, 1H), 3.01 (d,  $J = 9.2$  Hz, 1H), 2.49-2.39 (m, 5H), 1.23 (s, 3H);

$^{13}\text{C}$  NMR ( $\text{CDCl}_3$ , 100 MHz)  $\delta$  162.2 (d,  $J = 247.6$  Hz), 150.6, 143.7, 133.3 (d,  $J = 8.2$  Hz), 132.4, 128.7 (d,  $J = 180.6$  Hz), 119.4 (d,  $J = 3.6$  Hz), 115.4 (d,  $J = 21.9$  Hz), 110.0, 106.5, 86.0, 81.5, 58.7, 52.2, 45.3, 30.0, 23.4, 21.5;

$^{19}\text{F}$  NMR ( $\text{CDCl}_3$ , 376 MHz)  $\delta$  -111.6;

HRMS Calcd (ESI)  $m/z$  for  $\text{C}_{22}\text{H}_{22}\text{FNNaO}_2\text{S}$   $[\text{M} + \text{Na}]^+$ : 406.1247, found: 406.1249.

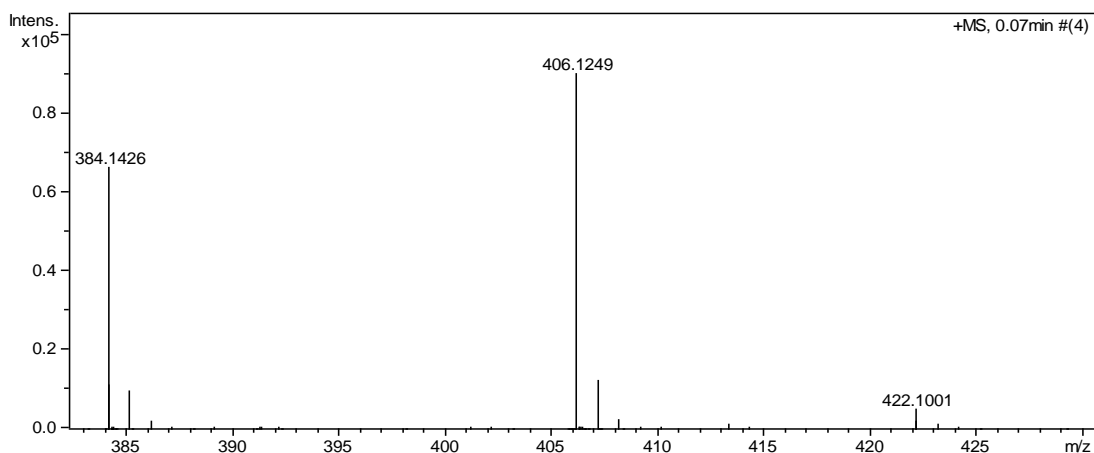

### 3-(3-(4-Chlorophenyl)prop-2-yn-1-yl)-3-methyl-4-methylene-1-tosylpyrrolidine

**(3h)**

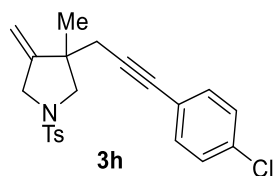

Flash column chromatography on a silica gel (ethyl acetate: petroleum ether, 11:1) gave the product **3h** (90.2 mg, 75% yield) as a yellow oil.

<sup>1</sup>H NMR (CDCl<sub>3</sub>, 400 MHz) δ 7.72 (d, *J* = 8.0 Hz, 2H), 7.31 (d, *J* = 8.0 Hz, 2H), 7.25 (s, 4H), 4.97-4.94 (m, 2H), 3.96-3.91 (m, 1H), 3.87-3.83 (m, 1H), 3.43 (d, *J* = 9.2 Hz, 1H), 3.01 (d, *J* = 9.6 Hz, 1H), 2.51-2.41 (m, 5H), 1.23 (s, 3H);

<sup>13</sup>C NMR (CDCl<sub>3</sub>, 100 MHz) δ 150.5, 143.7, 133.7, 132.7, 132.4, 129.6, 128.4, 127.8, 121.8, 106.5, 87.5, 81.5, 58.7, 52.2, 45.2, 30.0, 23.4, 21.5;

HRMS Calcd (ESI) m/z for C<sub>22</sub>H<sub>23</sub>ClNO<sub>2</sub>S [M + H]<sup>+</sup>: 400.1133, found: 400.1126.

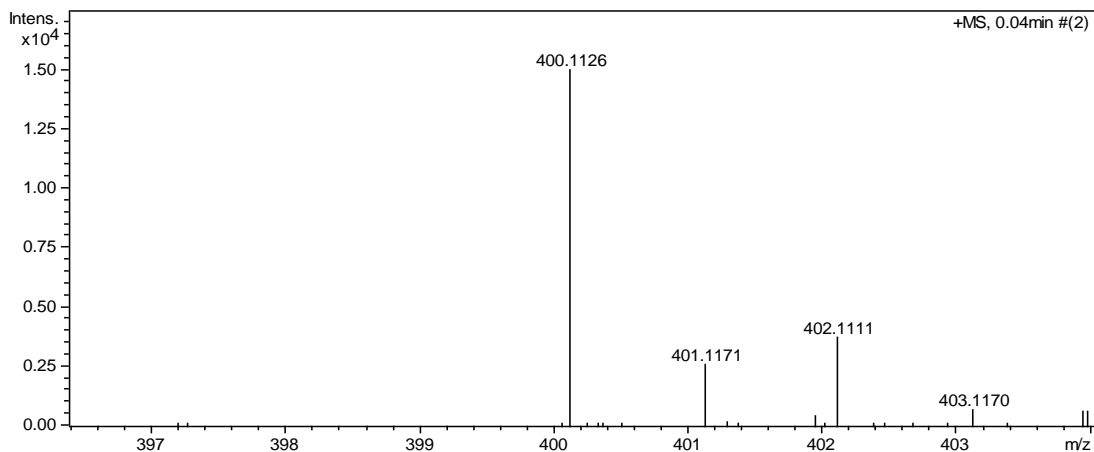



### 4-(3-(3-Methyl-4-methylene-1-tosylpyrrolidin-3-yl)prop-1-yn-1-yl)benzonitrile (**3i**)

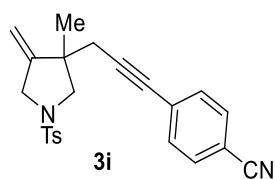

Flash column chromatography on a silica gel (ethyl acetate: petroleum ether, 5:1) gave the product **3i** (71.6 mg, 61% yield) as a brown oil.

$^1\text{H NMR}$  ( $\text{CDCl}_3$ , 400 MHz)  $\delta$  7.71 (d,  $J = 8.0$  Hz, 2H), 7.56 (d,  $J = 8.4$  Hz, 2H), 7.41 (d,  $J = 8.4$  Hz, 2H), 7.32 (d,  $J = 8.0$  Hz, 2H), 4.98-4.94 (m, 2H), 3.99-3.94 (m, 1H), 3.83-3.79 (m, 1H), 3.44 (d,  $J = 9.6$  Hz, 1H), 2.97 (d,  $J = 9.6$  Hz, 1H), 2.57-2.45 (m, 2H), 2.41 (s, 3H), 1.23 (s, 3H);

$^{13}\text{C NMR}$  ( $\text{CDCl}_3$ , 100 MHz)  $\delta$  150.4, 143.7, 132.4, 132.1, 131.9, 129.7, 128.3, 127.8, 118.4, 111.2, 106.7, 91.5, 81.3, 58.7, 52.1, 45.2, 30.2, 23.2, 21.5;

**HRMS** Calcd (ESI)  $m/z$  for  $\text{C}_{23}\text{H}_{22}\text{N}_2\text{NaO}_2\text{S}$   $[\text{M} + \text{Na}]^+$ : 413.1294, found: 413.1299.

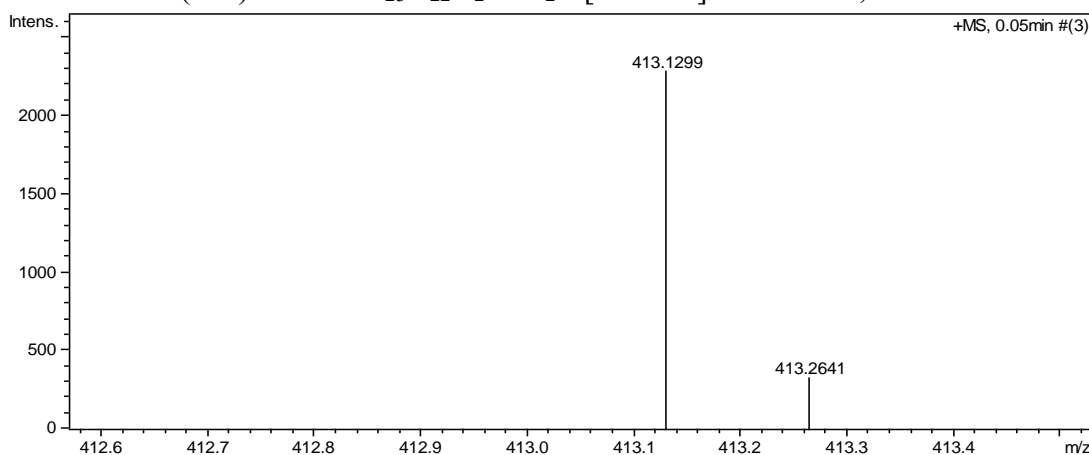

### 3-Methyl-4-methylene-3-(3-(*m*-tolyl)prop-2-yn-1-yl)-1-tosylpyrrolidine (**3j**)

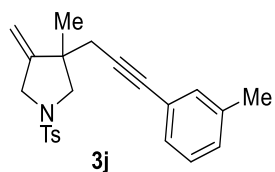

Flash column chromatography on a silica gel (ethyl acetate: petroleum ether, 11:1) gave the product **3j** (85.3 mg, 75% yield) as a yellow oil.

**<sup>1</sup>H NMR** (CDCl<sub>3</sub>, 400 MHz) δ 7.72 (d, *J* = 8.0 Hz, 2H), 7.31 (d, *J* = 8.0 Hz, 2H), 7.19-7.09 (m, 4H), 4.96-4.95 (m, 2H), 3.96-3.84 (m, 2H), 3.44 (d, *J* = 9.6 Hz, 1H), 3.03 (d, *J* = 9.6 Hz, 1H), 2.49-2.39 (m, 5H), 2.32 (s, 3H), 1.25 (s, 3H);

**<sup>13</sup>C NMR** (CDCl<sub>3</sub>, 100 MHz) δ 150.7, 143.6, 137.8, 132.5, 132.1, 129.6, 128.7, 128.6, 128.1, 127.8, 123.1, 106.5, 86.0, 82.7, 58.7, 52.2, 45.3, 30.0, 23.4, 21.5, 21.2;

**HRMS** Calcd (ESI) *m/z* for C<sub>23</sub>H<sub>26</sub>NO<sub>2</sub>S [M + H]<sup>+</sup>: 380.1679, found: 380.1673.

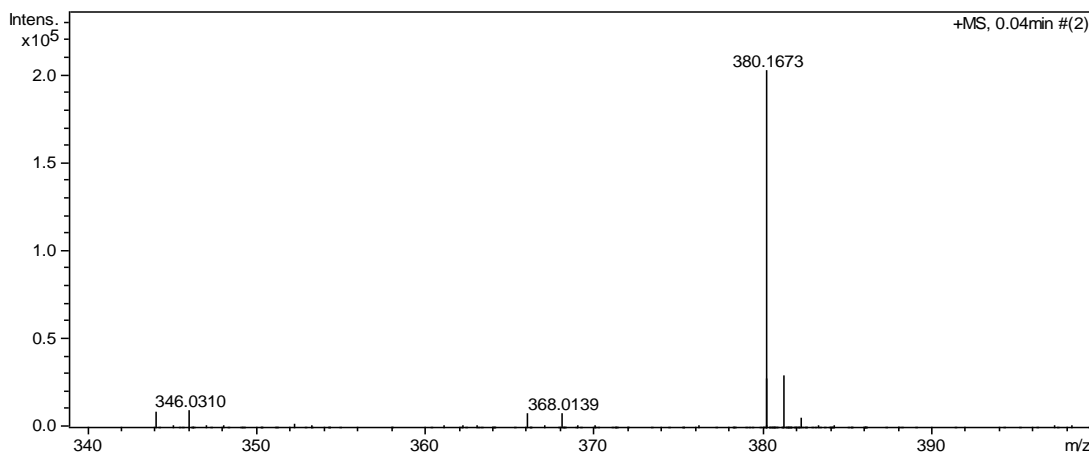

### 3-(3-(2-Fluorophenyl)prop-2-yn-1-yl)-3-methyl-4-methylene-1-

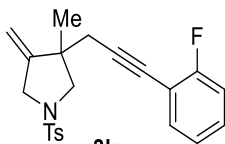

**tosylpyrrolidine(3k)**

Flash column chromatography on a silica gel (ethyl acetate: petroleum ether, 10:1) gave the product **3k** (70.1 mg, 61% yield) as a yellow oil.

**<sup>1</sup>H NMR** (CDCl<sub>3</sub>, 400 MHz) δ 7.72 (d, *J* = 8.4 Hz, 2H), 7.34-7.30 (m, 3H), 7.28-7.23 (m, 1H), 7.08-7.01 (m, 2H), 4.98-4.97 (m, 2H), 3.96-3.91 (m, 1H), 3.89-3.85 (m, 1H), 3.45 (d, *J* = 9.6 Hz, 1H), 3.04 (d, *J* = 9.6 Hz, 1H), 2.48-2.47 (m, 2H), 2.40 (s, 3H), 1.26 (s, 3H);

**<sup>13</sup>C NMR** (CDCl<sub>3</sub>, 100 MHz) δ 162.8 (d, *J* = 249.3 Hz), 150.4, 143.6, 133.3 (d, *J* = 1.3 Hz), 132.4, 129.6, 129.4 (d, *J* = 7.8 Hz), 127.7, 123.7 (d, *J* = 3.7 Hz), 115.3 (d, *J* = 20.8 Hz), 111.8 (d, *J* = 15.7 Hz), 106.6, 91.9 (d, *J* = 3.3 Hz), 75.9 (d, *J* = 0.6 Hz), 58.7, 52.2, 45.2, 30.1, 23.2, 21.5;

**<sup>19</sup>F NMR** (CDCl<sub>3</sub>, 376 MHz) δ -110.6;

HRMS Calcd (ESI)  $m/z$  for  $C_{22}H_{22}FNNaO_2S$   $[M + Na]^+$ : 406.1247, found: 406.1250.

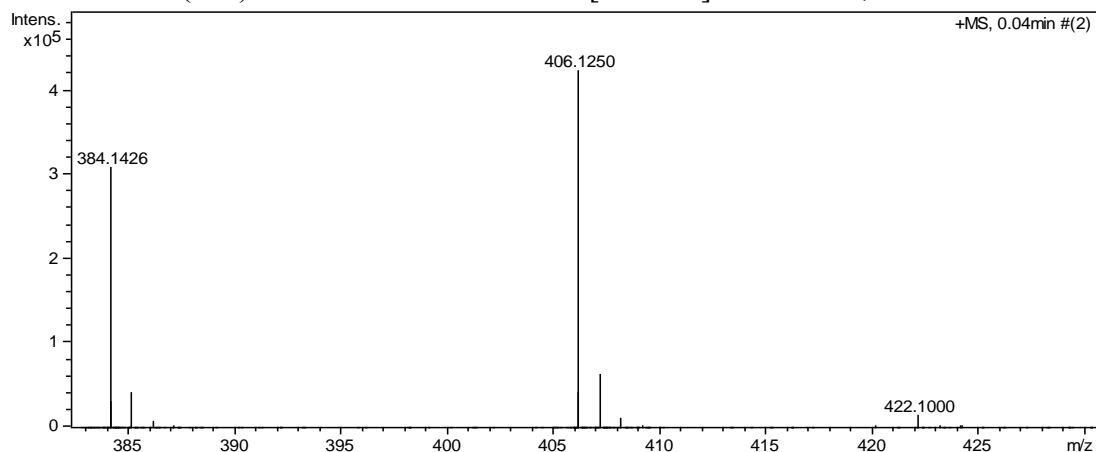

### 3-Methyl-4-methylene-3-(3-(naphthalen-1-yl)prop-2-yn-1-yl)-1-tosylpyrrolidine

(3I)

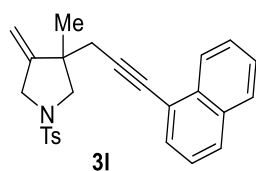

Flash column chromatography on a silica gel (ethyl acetate: petroleum ether, 10:1) gave the product **3I** (97.3 mg, 78% yield) as a yellow oil.

$^1H$  NMR ( $CDCl_3$ , 400 MHz)  $\delta$  8.25 (d,  $J = 8.4$  Hz, 1H), 7.86-7.79 (m, 2H), 7.73 (d,  $J = 8.0$  Hz, 2H), 7.58-7.50 (m, 3H), 7.40 (t,  $J = 7.6$  Hz, 1H), 7.24 (d,  $J = 8.0$  Hz, 2H), 5.03-5.02 (m, 2H), 4.02-3.91 (m, 2H), 3.56 (d,  $J = 9.6$  Hz, 1H), 3.11 (d,  $J = 9.6$  Hz, 1H), 2.69-2.58 (m, 2H), 2.33 (s, 3H), 1.34 (s, 3H);

$^{13}C$  NMR ( $CDCl_3$ , 100 MHz)  $\delta$  150.6, 143.6, 133.3, 133.1, 132.4, 130.2, 129.6, 128.2 (2C), 127.7, 126.6, 126.2, 126.0, 125.1, 121.0, 106.6, 91.3, 80.6, 58.7, 52.3, 45.4, 30.3, 23.6, 21.4;

**HRMS** Calcd (ESI)  $m/z$  for  $C_{26}H_{26}NO_2S$   $[M + H]^+$ : 416.1679, found: 416.1682.

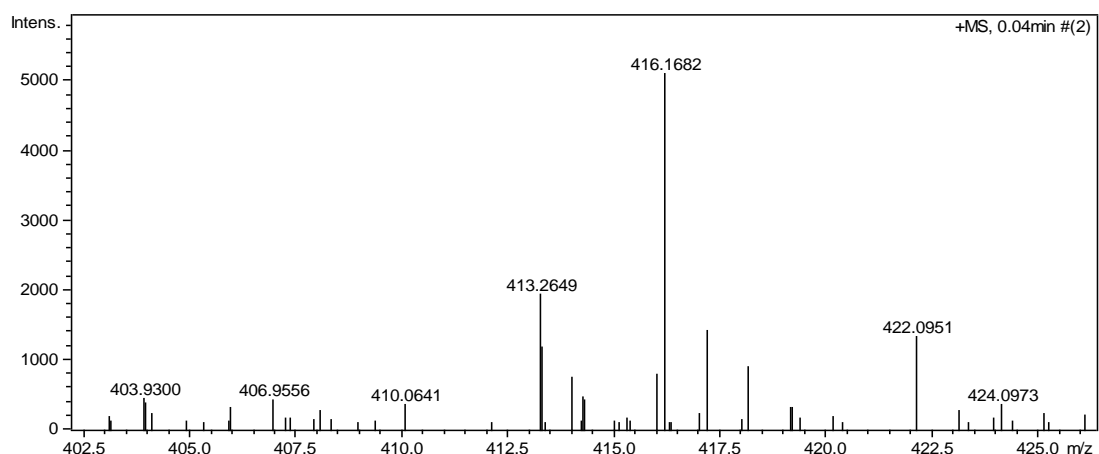

### 3-Methyl-4-methylene-3-(3-(naphthalen-2-yl)prop-2-yn-1-yl)-1-tosylpyrrolidine

**(3m)**

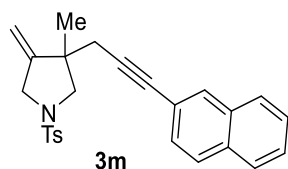

Flash column chromatography on a silica gel (ethyl acetate: petroleum ether, 10:1) gave the product **3m** (67.2 mg, 54% yield) as a yellow solid; m.p.: 82-85 °C.

**<sup>1</sup>H NMR** (CDCl<sub>3</sub>, 400 MHz)  $\delta$  7.86 (s, 1H), 7.81-7.73 (m, 5H), 7.51-7.45 (m, 2H), 7.38 (d,  $J$  = 8.4 Hz, 1H), 7.30 (d,  $J$  = 8.4 Hz, 2H), 5.00-4.99 (m, 2H), 3.99-3.87 (m, 2H), 3.50 (d,  $J$  = 9.6 Hz, 1H), 3.07 (d,  $J$  = 9.2 Hz, 1H), 2.56-2.46 (m, 2H), 2.35 (s, 3H), 1.29 (s, 3H);

**<sup>13</sup>C NMR** (CDCl<sub>3</sub>, 100 MHz)  $\delta$  150.8, 143.7, 132.9, 132.5, 132.4, 131.1, 129.6, 128.5, 127.8 (2C), 127.7, 127.5, 126.5, 126.4, 120.6, 106.6, 86.8, 83.0, 58.8, 52.3, 45.3, 30.1, 23.5, 21.5;

**HRMS** Calcd (ESI)  $m/z$  for  $C_{26}H_{25}NNaO_2S$   $[M + Na]^+$ : 438.1498, found: 438.1507.

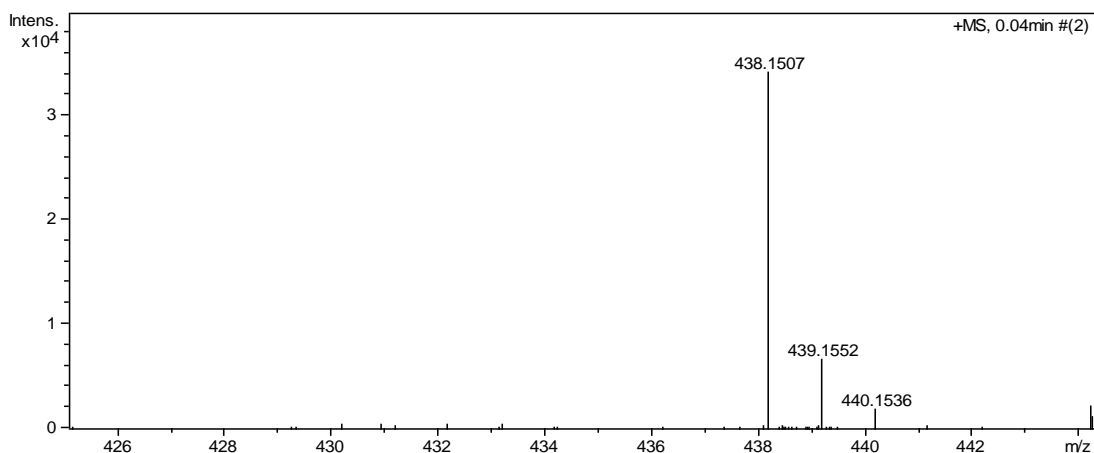

### 3-Methyl-4-methylene-3-(3-(thiophen-3-yl)prop-2-yn-1-yl)-1-tosylpyrrolidine (**3n**)

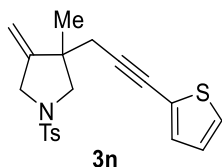

Flash column chromatography on a silica gel (ethyl acetate: petroleum ether, 10: 1) gave the product **3n** (66.5 mg, 60% yield) as a yellow solid; m.p.: 53-57 °C.

$^1\text{H NMR}$  ( $\text{CDCl}_3$ , 400 MHz)  $\delta$  7.72 (d,  $J = 8.0$  Hz, 2H), 7.33-7.29 (m, 3H), 7.24-7.22 (m, 1H), 7.01-6.99 (m, 1H), 4.96-4.93 (m, 2H), 3.94-3.83 (m, 2H), 3.43 (d,  $J = 9.2$  Hz, 1H), 3.01 (d,  $J = 9.2$  Hz, 1H), 2.48-2.38 (m, 5H), 1.23 (s, 3H);

$^{13}\text{C NMR}$  ( $\text{CDCl}_3$ , 100 MHz)  $\delta$  150.6, 143.7, 132.4, 129.9, 129.6, 128.0, 127.8, 125.1, 122.3, 106.5, 85.9, 77.6, 58.7, 52.2, 45.2, 30.0, 23.5, 21.5;

**HRMS** Calcd (ESI)  $m/z$  for  $\text{C}_{20}\text{H}_{21}\text{NNaO}_2\text{S}_2$   $[\text{M} + \text{Na}]^+$ : 394.0906, found: 394.0899.

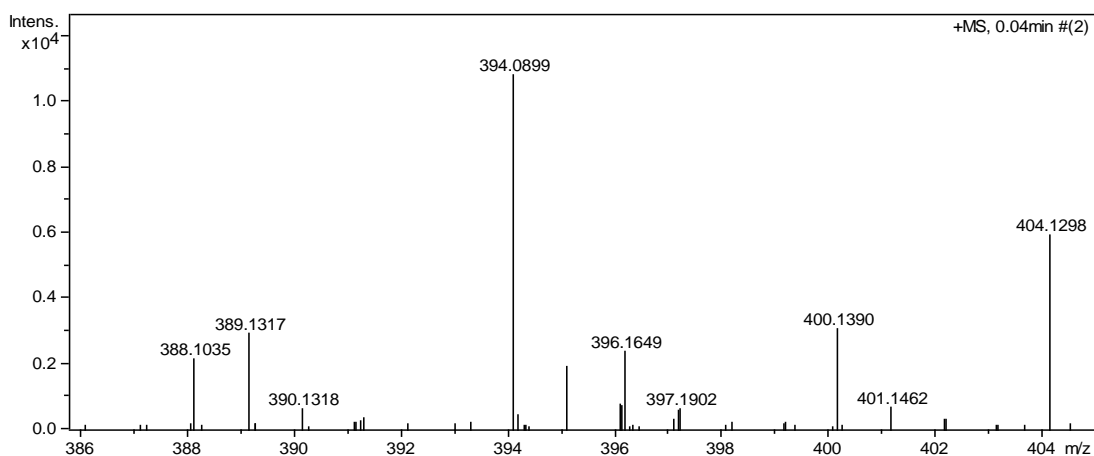

### 3-(3-(3-Methyl-4-methylene-1-tosylpyrrolidin-3-yl)prop-1-yn-1-yl)pyridine (3o)

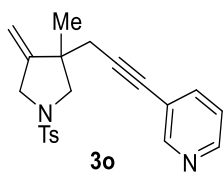

Flash column chromatography on a silica gel (ethyl acetate: petroleum ether, 3:1) gave the product **3o** (70.8 mg, 64% yield) as a yellow solid; m.p.: 59-63 °C.

<sup>1</sup>H NMR (CDCl<sub>3</sub>, 400 MHz) δ 8.52 (d, *J* = 15.2 Hz, 2H), 7.71 (d, *J* = 8.4 Hz, 2H), 7.61 (d, *J* = 7.6 Hz, 1H), 7.32 (d, *J* = 8.4 Hz, 2H), 7.23-7.20 (m, 1H), 4.96 (d, *J* = 8.0 Hz, 2H), 3.96-3.82 (m, 2H), 3.43 (d, *J* = 9.6 Hz, 1H), 3.00 (d, *J* = 9.2 Hz, 1H), 2.55-2.44 (m, 2H), 2.41 (s, 3H), 1.24 (s, 3H);

<sup>13</sup>C NMR (CDCl<sub>3</sub>, 100 MHz) δ 152.2, 150.4, 148.2, 143.8, 138.5, 132.2, 129.7, 127.8, 122.9, 120.4, 106.7, 90.1, 79.4, 58.6, 52.2, 45.2, 30.1, 23.3, 21.6;

HRMS Calcd (ESI) *m/z* for C<sub>21</sub>H<sub>22</sub>N<sub>2</sub>NaO<sub>2</sub>S [M + Na]<sup>+</sup>: 389.1294, found: 389.1290.

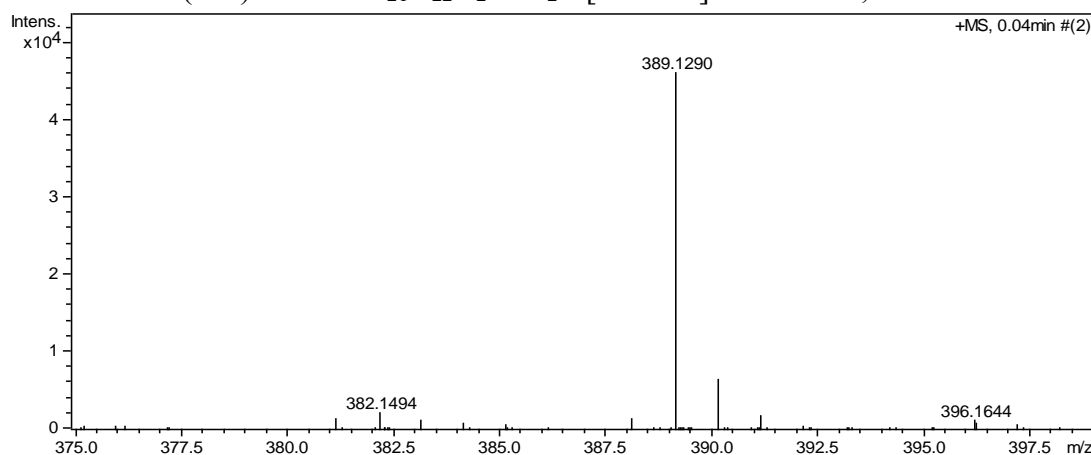

### 3-Methyl-4-methylene-3-(3-ferrocylprop-2-yn-1-yl)-1-tosylpyrrolidine (3p)

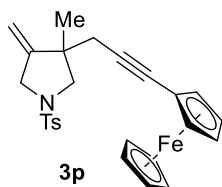

Flash column chromatography on a silica gel (ethyl acetate: petroleum ether, 11:1) gave the product **3p** (83.7 mg, 59% yield) as a yellow solid; m.p.: 104-108 °C.

**<sup>1</sup>H NMR** (CDCl<sub>3</sub>, 400 MHz) δ 7.73 (d, *J* = 8.0 Hz, 2H), 7.34 (d, *J* = 8.0 Hz, 2H), 4.96-4.95 (m, 2H), 4.31 (d, *J* = 12.0 Hz, 2H), 4.17-4.11 (m, 7H), 3.94-3.84 (m, 2H), 3.42 (d, *J* = 9.2 Hz, 1H), 3.01 (d, *J* = 9.2 Hz, 1H), 2.43 (s, 3H), 2.40-2.29 (m, 2H), 1.23 (s, 3H);  
**<sup>13</sup>C NMR** (CDCl<sub>3</sub>, 100 MHz) δ 150.7, 143.6, 132.5, 129.7, 127.8, 106.4, 82.3, 80.5, 71.2, 69.7, 68.2, 65.6, 58.7, 52.2, 45.2, 30.1, 23.5, 21.5;

**HRMS** Calcd (ESI) *m/z* for C<sub>26</sub>H<sub>28</sub>FeNO<sub>2</sub>S [M + H]<sup>+</sup>: 474.1185, found: 474.1195.

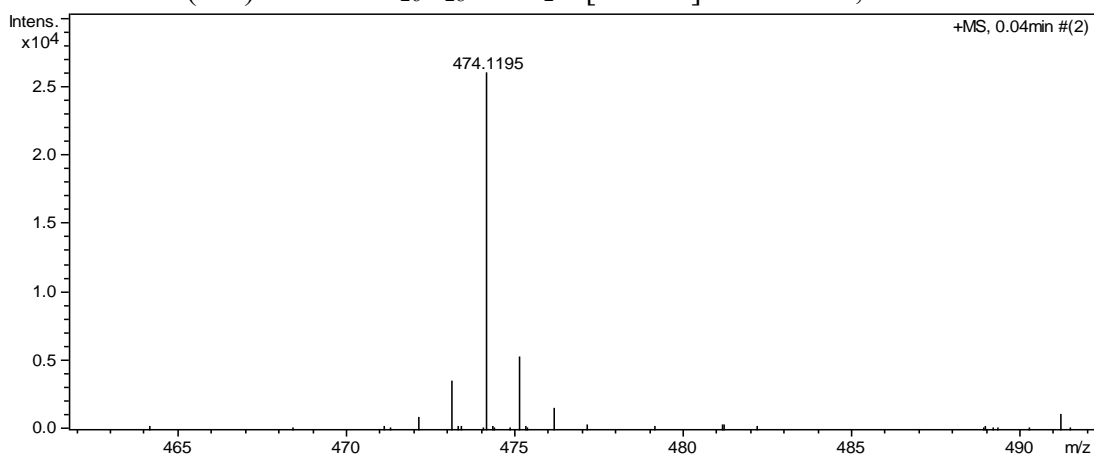

### 3-(3-Cyclopropylprop-2-yn-1-yl)-1-((4-methoxyphenyl)sulfonyl)-3-methyl-4-methylenepyrrolidine (**3q**)

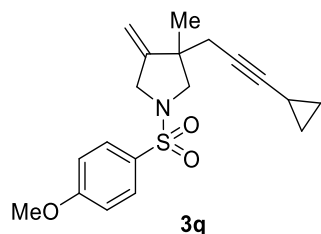

Flash column chromatography on a silica gel (ethyl acetate: petroleum ether, 5:1) gave the product **3q** (25.9 mg, 25% yield) as a yellow oil.

**<sup>1</sup>H NMR** (CDCl<sub>3</sub>, 400 MHz) δ 7.76 (d, *J* = 8.4 Hz, 2H), 7.00 (d, *J* = 8.4 Hz, 2H), 4.88 (d, *J* = 18.0 Hz, 2H), 3.88-3.83 (m, 5H), 3.30 (d, *J* = 9.2 Hz, 1H), 2.95 (d, *J* = 9.2 Hz, 1H), 2.20-2.10 (m, 2H), 1.25 (s, 1H), 1.15 (s, 3H), 0.70-0.68 (m, 2H), 0.53 (s, 2H);

**<sup>13</sup>C NMR** (CDCl<sub>3</sub>, 100 MHz) δ 163.0, 150.9, 129.9, 127.3, 114.2, 106.1, 85.6, 71.7, 58.6, 55.6, 52.3, 45.2, 29.5, 23.4, 8.0 (2C), -0.6;

**HRMS** Calcd (ESI)  $m/z$  for  $C_{19}H_{23}NNaO_3S$   $[M + Na]^+$ : 368.1291, found: 368.1301.

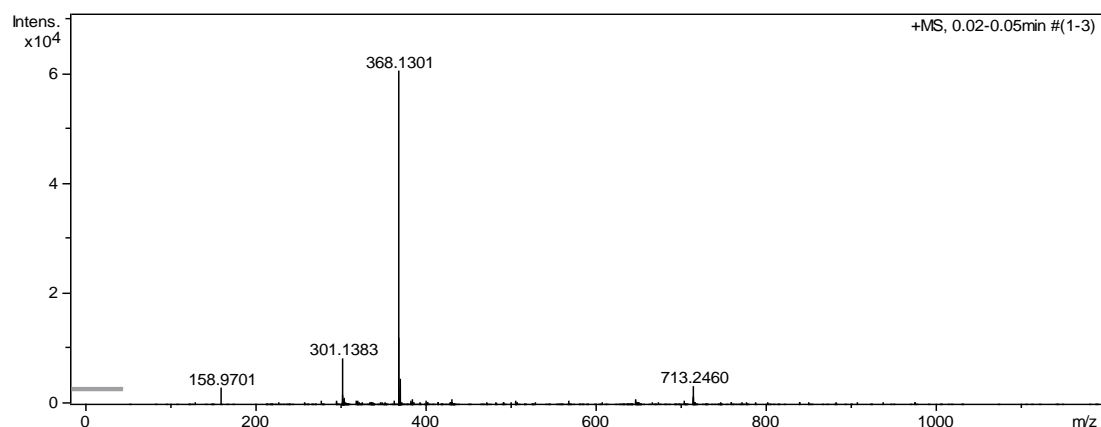

**3-(3-(Cyclohex-1-en-1-yl)prop-2-yn-1-yl)-1-((4-methoxyphenyl)sulfonyl)-3-methyl-4-methylenepyrrolidine (3r)**

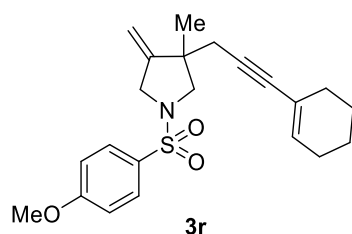

Flash column chromatography on a silica gel (ethyl acetate: petroleum ether, 7:1) gave the product **3r** (72.2 mg, 62% yield) as a yellow oil.

<sup>1</sup>H NMR (CDCl<sub>3</sub>, 400 MHz)  $\delta$  7.76 (d,  $J$  = 8.4 Hz, 2H), 6.99 (d,  $J$  = 8.8 Hz, 2H), 5.94 (s, 1H), 4.91 (d,  $J$  = 11.2 Hz, 2H), 3.86-3.84 (m, 5H), 3.33 (d,  $J$  = 9.6 Hz, 1H), 2.98 (d,  $J$  = 9.6 Hz, 1H), 2.36-2.26 (m, 2H), 2.05-2.01 (m, 4H), 1.61-1.55 (m, 4H), 1.18 (s, 3H);

<sup>13</sup>C NMR (CDCl<sub>3</sub>, 100 MHz)  $\delta$  163.0, 150.8, 133.7, 129.9, 127.2, 120.6, 114.1, 106.3, 84.4, 83.4, 58.7, 55.5, 52.3, 45.2, 29.9, 29.4, 25.5, 23.5, 22.3, 21.5;

**HRMS** Calcd (ESI)  $m/z$  for  $C_{22}H_{27}NNaO_3S$   $[M + Na]^+$ : 408.1604, found: 408.1588.



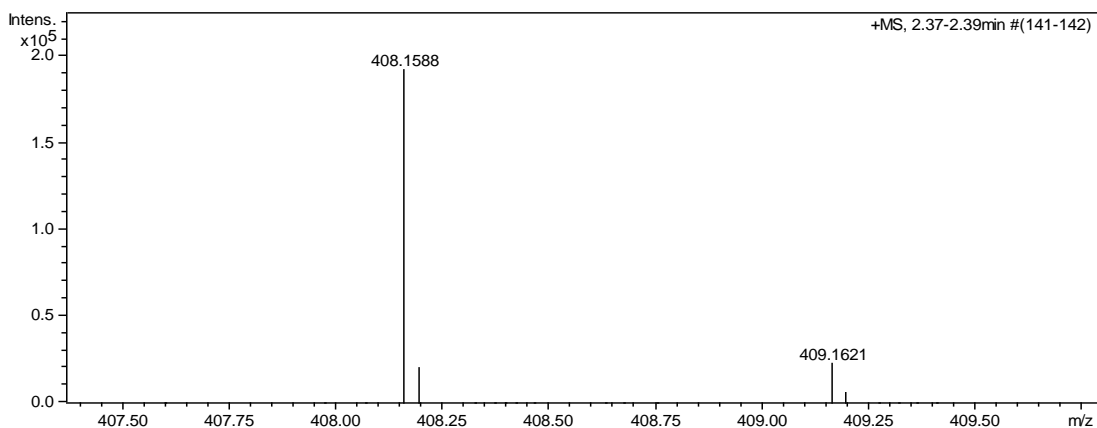

**(8*R*,9*S*,13*S*,14*S*)-13-Methyl-2-(3-(3-methyl-4-methylene-1-tosylpyrrolidin-3-yl)prop-1-yn-1-yl)-6,7,8,9,11,12,13,14,15,16-decahydro-17*H*-cyclopenta[*a*]phenanthren-17-one (3*s*)**

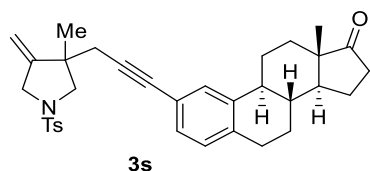

Flash column chromatography on a silica gel (ethyl acetate: petroleum ether, 5:1) gave the product **3s** (84.7 mg, 52% yield) as a yellow solid; m.p.: 198-201 °C.

<sup>1</sup>H NMR (CDCl<sub>3</sub>, 400 MHz) δ 7.71 (d, *J* = 7.6 Hz, 2H), 7.31 (d, *J* = 7.6 Hz, 2H), 7.20 (d, *J* = 8.4 Hz, 1H), 7.11 (d, *J* = 6.8 Hz, 2H), 4.94 (s, 2H), 3.93 (d, *J* = 14.4 Hz, 1H), 3.84 (d, *J* = 14.0 Hz, 1H), 3.43 (d, *J* = 9.2 Hz, 1H), 3.00 (d, *J* = 9.2 Hz, 1H), 2.88-2.85 (m, 2H), 2.53-2.46 (m, 1H), 2.42-2.37 (m, 5H), 2.29-2.25 (m, 1H), 2.18-1.94 (m, 5H), 1.67-1.57 (m, 2H), 1.52-1.37 (m, 4H), 1.23 (s, 3H), 0.90 (s, 3H);

<sup>13</sup>C NMR (CDCl<sub>3</sub>, 100 MHz) δ 220.6, 150.6, 143.6, 139.7, 136.4, 132.4, 131.9, 129.6, 128.8, 127.7, 125.2, 120.6, 106.4, 85.6, 82.5, 58.7, 52.1, 50.3, 47.8, 45.2, 44.3, 37.9, 35.7, 31.4, 30.0, 29.0, 26.2, 25.5, 23.2, 21.5, 13.7, 0.9;

**HRMS** Calcd (ESI) *m/z* for C<sub>34</sub>H<sub>39</sub>NNaO<sub>3</sub>S [M + Na]<sup>+</sup>: 564.2543, found: 564.2546.

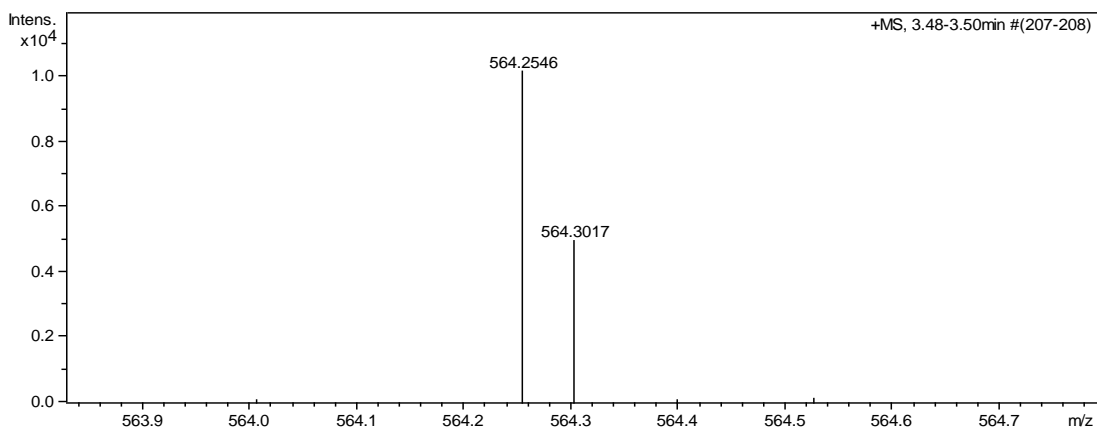

**(1*S*,2*R*,5*S*)-2-Isopropyl-5-methylcyclohexyl-4-(3-(3-methyl-4-methylene-1-tosylpyrrolidin-3-yl)prop-1-yn-1-yl)benzoate (**3t**)**

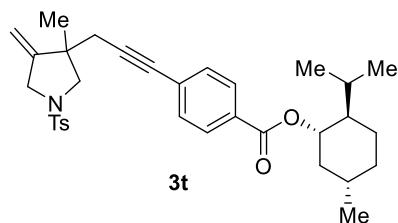

Flash column chromatography on a silica gel (ethyl acetate: petroleum ether, 10:1) gave the product **3t** (100.5 mg, 61% yield) as a yellow oil.

<sup>1</sup>H NMR (CDCl<sub>3</sub>, 400 MHz) δ 7.95 (d, *J* = 8.0 Hz, 2H), 7.71 (d, *J* = 8.0 Hz, 2H), 7.36-7.30 (m, 4H), 4.96 (d, *J* = 7.2 Hz, 2H), 4.92-4.89 (m, 1H), 3.93 (d, *J* = 14.0 Hz, 1H), 3.85 (d, *J* = 14.0 Hz, 1H), 3.43 (d, *J* = 9.6 Hz, 1H), 3.01 (d, *J* = 9.6 Hz, 1H), 2.54-2.43 (m, 2H), 2.40 (s, 3H), 2.11 (d, *J* = 12.0 Hz, 1H), 1.95-1.90 (m, 1H), 1.72 (d, *J* = 11.2 Hz, 2H), 1.57-1.52 (m, 2H), 1.25 (s, 3H), 1.17-1.05 (m, 3H), 0.93-0.90 (m, 6H), 0.79 (d, *J* = 6.8 Hz, 3H);

<sup>13</sup>C NMR (CDCl<sub>3</sub>, 100 MHz) δ 165.5, 150.5, 143.7, 132.3, 131.4, 129.8, 129.6, 129.3, 127.8, 106.6, 89.6, 82.1, 75.0, 58.7, 52.2, 47.2, 45.3, 40.9, 34.2, 31.4, 30.1, 26.5, 23.6, 23.5, 22.0, 21.5, 20.7, 16.5;

**HRMS** Calcd (ESI) *m/z* for C<sub>33</sub>H<sub>41</sub>NNaO<sub>4</sub>S [M + Na]<sup>+</sup>: 570.2649, found: 570.2647.

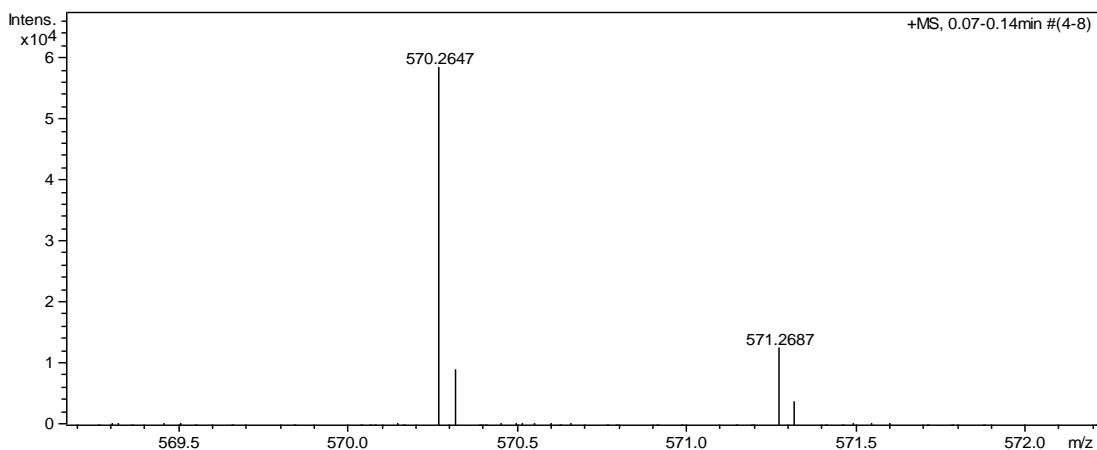

**3-(3-(4-Methoxyphenyl)prop-2-yn-1-yl)-3-methyl-4-methylene-1-(phenylsulfonyl)pyrrolidine (4a)**

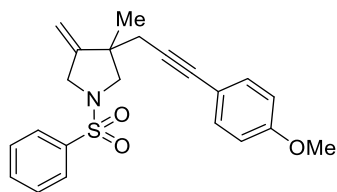

**4a**

Flash column chromatography on a silica gel (ethyl acetate: petroleum ether, 10:1) gave the product **4a** (82.6 mg, 72% yield) as a yellow solid; m.p.: 71-74 °C.

<sup>1</sup>H NMR (CDCl<sub>3</sub>, 400 MHz) δ 7.76 (d, *J* = 8.4 Hz, 2H), 7.52-7.42 (m, 3H), 7.17 (d, *J* = 6.8 Hz, 2H), 6.73 (d, *J* = 8.8 Hz, 2H), 4.87 (s, 2H), 3.88-3.79 (m, 2H), 3.72 (s, 3H), 3.39 (d, *J* = 9.2 Hz, 1H), 2.97 (d, *J* = 9.2 Hz, 1H), 2.37-2.28 (m, 2H), 1.15 (s, 3H);

<sup>13</sup>C NMR (CDCl<sub>3</sub>, 100 MHz) δ 159.2, 150.5, 135.4, 132.8 (2C), 129.0, 127.6, 115.4, 113.7, 106.5, 84.6, 82.3, 58.6, 55.2, 52.2, 45.3, 29.9, 23.3;

HRMS Calcd (ESI) m/z for C<sub>22</sub>H<sub>23</sub>NNaO<sub>3</sub>S [M + Na]<sup>+</sup>: 404.1291, found: 404.1294.

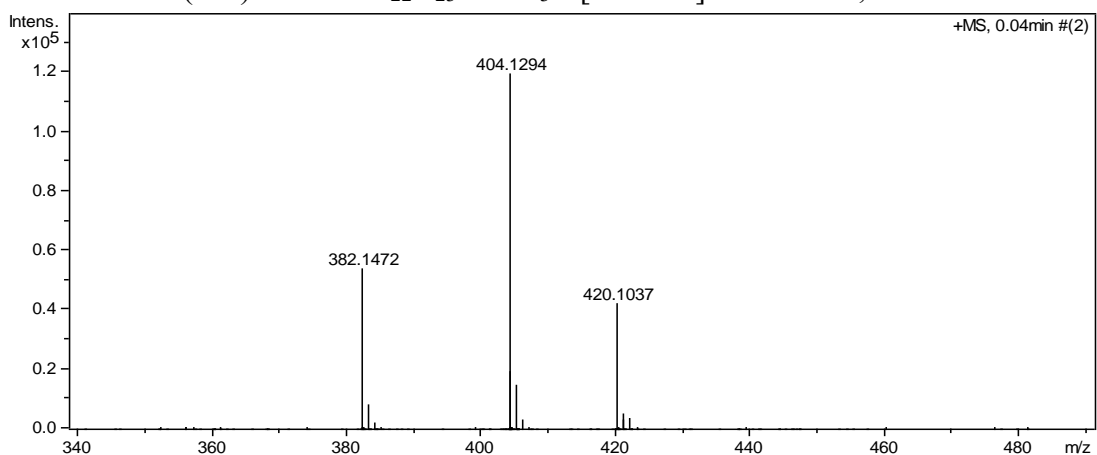

**3-(3-(4-Methoxyphenyl)prop-2-yn-1-yl)-1-((4-methoxyphenyl)sulfonyl)-3-methyl-4-methylenepyrrolidine (4b)**

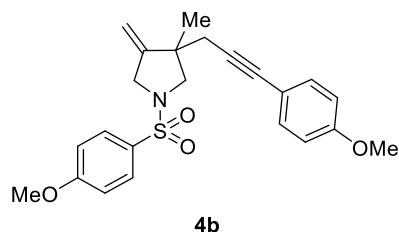

Flash column chromatography on a silica gel (ethyl acetate: petroleum ether, 5:1) gave the product **4b** (84.0 mg, 68% yield) as a yellow oil.

**<sup>1</sup>H NMR** (CDCl<sub>3</sub>, 400 MHz) δ 7.76 (d, *J* = 8.8 Hz, 2H), 7.23 (d, *J* = 8.4 Hz, 2H), 6.97 (d, *J* = 9.2 Hz, 2H), 6.80 (d, *J* = 8.8 Hz, 2H), 4.95-4.94 (m, 2H), 3.89-3.87 (m, 2H), 3.83 (s, 3H), 3.79 (s, 3H), 3.42 (d, *J* = 9.6 Hz, 1H), 3.02 (d, *J* = 9.6 Hz, 1H), 2.47-2.37 (m, 2H), 1.24 (s, 3H);

**<sup>13</sup>C NMR** (CDCl<sub>3</sub>, 100 MHz) δ 162.9, 159.1, 150.7, 132.8, 129.8, 126.9, 115.4, 114.1, 113.7, 106.3, 84.7, 82.3, 58.6, 55.5, 55.1, 52.3, 45.2, 29.9, 23.6;

**HRMS** Calcd (ESI) *m/z* for C<sub>23</sub>H<sub>25</sub>NNaO<sub>4</sub>S [M + Na]<sup>+</sup>: 434.1397, found: 434.1399.

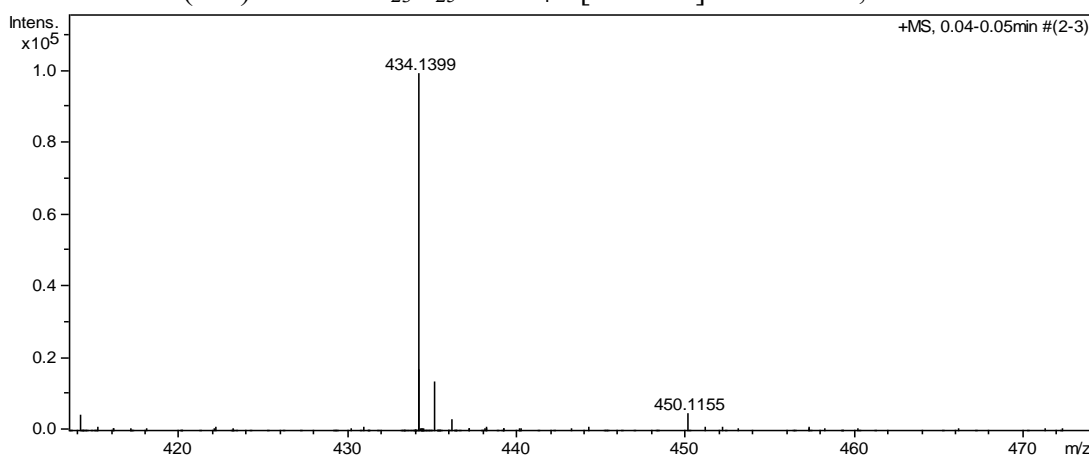

**1-((4-(*Tert*-butyl)phenyl)sulfonyl)-3-(3-(4-methoxyphenyl)prop-2-yn-1-yl)-3-methyl-4-methylenepyrrolidine (4c)**

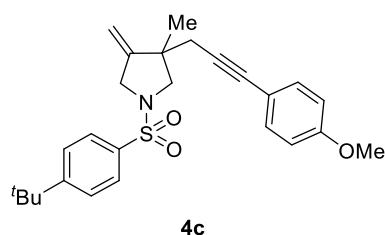

Flash column chromatography on a silica gel (ethyl acetate: petroleum ether, 12:1) gave the product **4c** (94.3 mg, 72% yield) as a yellow solid; m.p.: 85-89 °C.

<sup>1</sup>H NMR (CDCl<sub>3</sub>, 400 MHz) δ 7.76 (d, *J* = 8.8 Hz, 2H), 7.52 (d, *J* = 8.8 Hz, 2H), 7.29 (d, *J* = 8.8 Hz, 2H), 6.81 (d, *J* = 8.8 Hz, 2H), 4.96-4.95 (m, 2H), 3.99-3.94 (m, 1H), 3.90-3.85 (m, 1H), 3.80 (s, 3H), 3.46 (d, *J* = 9.6 Hz, 1H), 3.04 (d, *J* = 9.2 Hz, 1H), 2.47-2.37 (m, 2H), 1.33 (s, 9H), 1.24 (s, 3H);

<sup>13</sup>C NMR (CDCl<sub>3</sub>, 100 MHz) δ 159.2, 156.5, 150.8, 132.9, 132.7, 127.6, 126.0, 115.5, 113.8, 106.4, 84.8, 82.3, 58.7, 55.2, 52.2, 45.3, 35.1, 31.0, 30.0, 23.2;

HRMS Calcd (ESI) *m/z* for C<sub>26</sub>H<sub>31</sub>NNaO<sub>3</sub>S [M + Na]<sup>+</sup>: 460.1917, found: 460.1924.

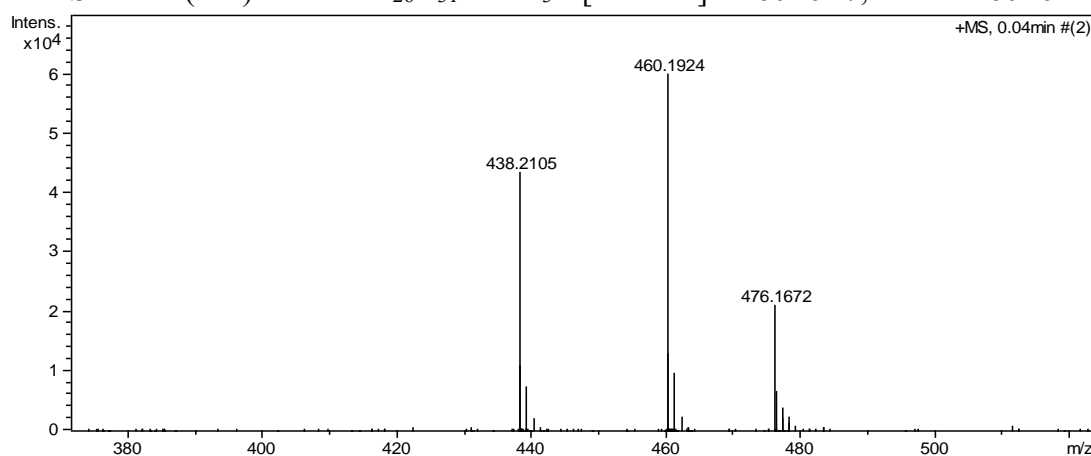

### 3-(3-(4-Methoxyphenyl)prop-2-yn-1-yl)-3-methyl-4-methylene-1-(o-tolylsulfonyl)pyrrolidine (**4d**)

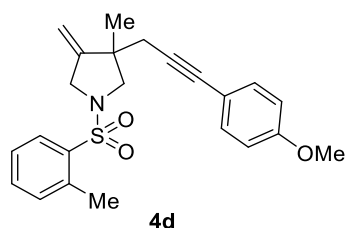

Flash column chromatography on a silica gel (ethyl acetate: petroleum ether, 15:1) gave the product **4d** (73.4 mg, 62% yield) as a yellow oil.

<sup>1</sup>H NMR (CDCl<sub>3</sub>, 400 MHz) δ 7.95-7.93 (m, 1H), 7.46-7.42 (m, 1H), 7.32-7.28 (m, 2H), 7.27-7.24 (m, 2H), 6.80 (d, *J* = 9.2 Hz, 2H), 5.00-4.98 (m, 2H), 3.99-3.98 (m, 2H), 3.79 (s, 3H), 3.51 (d, *J* = 9.2 Hz, 1H), 3.16 (d, *J* = 9.6 Hz, 1H), 2.66 (s, 3H), 2.55-2.43 (m, 2H), 1.28 (s, 3H);

$^{13}\text{C}$  NMR ( $\text{CDCl}_3$ , 100 MHz)  $\delta$  159.2, 150.7, 138.1, 135.9, 132.8 (2C), 132.7, 129.9, 126.0, 115.4, 113.7, 106.4, 84.6, 82.3, 58.1, 55.2, 51.6, 45.3, 30.0, 23.2, 20.7;

HRMS Calcd (ESI)  $m/z$  for  $\text{C}_{23}\text{H}_{25}\text{NNaO}_3\text{S}$   $[\text{M} + \text{Na}]^+$ : 418.1447, found: 418.1444.

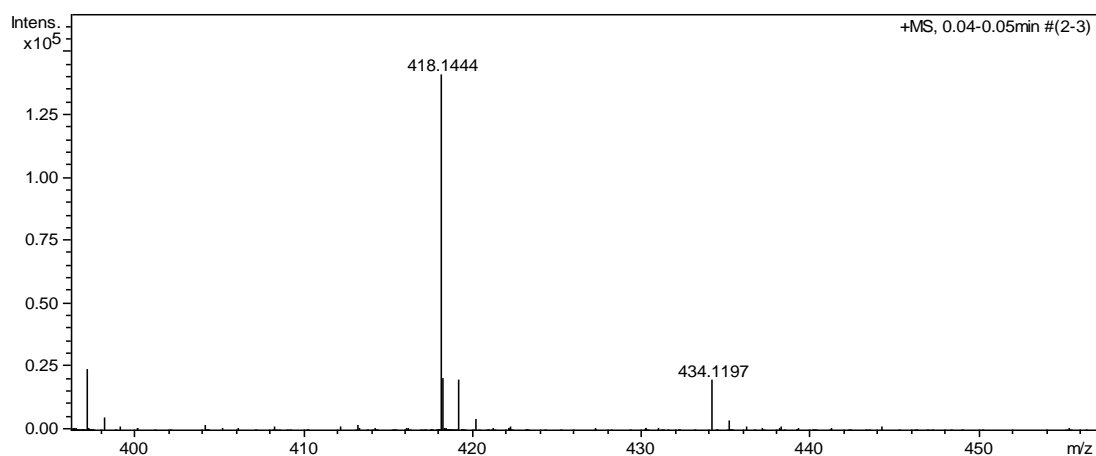

**1-((4-Fluorophenyl)sulfonyl)-3-(3-(4-methoxyphenyl)prop-2-yn-1-yl)-3-methyl-4-methylenepyrrolidine (4e)**

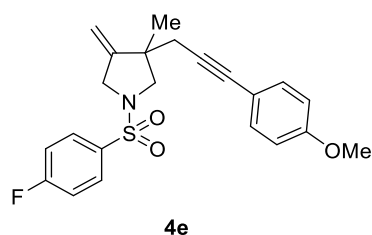

Flash column chromatography on a silica gel (ethyl acetate: petroleum ether, 10:1) gave the product **4e** (78.6 mg, 66% yield) as a yellow solid; m.p.: 87-91 °C.

$^1\text{H}$  NMR ( $\text{CDCl}_3$ , 400 MHz)  $\delta$  7.87-7.83 (m, 2H), 7.27-7.17 (m, 4H), 6.81 (d,  $J$  = 8.8 Hz, 2H), 4.98-4.97 (m, 2H), 3.92-3.91 (m, 2H), 3.80 (s, 3H), 3.45 (d,  $J$  = 9.2 Hz, 1H), 3.05 (d,  $J$  = 9.2 Hz, 1H), 2.47-2.38 (m, 2H), 1.25 (s, 3H);

$^{13}\text{C}$  NMR ( $\text{CDCl}_3$ , 100 MHz)  $\delta$  165.2 (d,  $J$  = 253.7 Hz), 159.3, 150.4, 132.9, 131.8, 130.4 (d,  $J$  = 9.2 Hz), 116.3 (d,  $J$  = 22.3 Hz), 115.3, 113.8, 106.7, 84.6, 82.5, 58.7, 55.3, 52.3, 45.4, 30.0, 23.6;

$^{19}\text{F}$  NMR ( $\text{CDCl}_3$ , 376 MHz) -104.8;

HRMS Calcd (ESI)  $m/z$  for  $\text{C}_{22}\text{H}_{22}\text{FNNaO}_3\text{S}$   $[\text{M} + \text{Na}]^+$ : 422.1197, found: 422.1203.

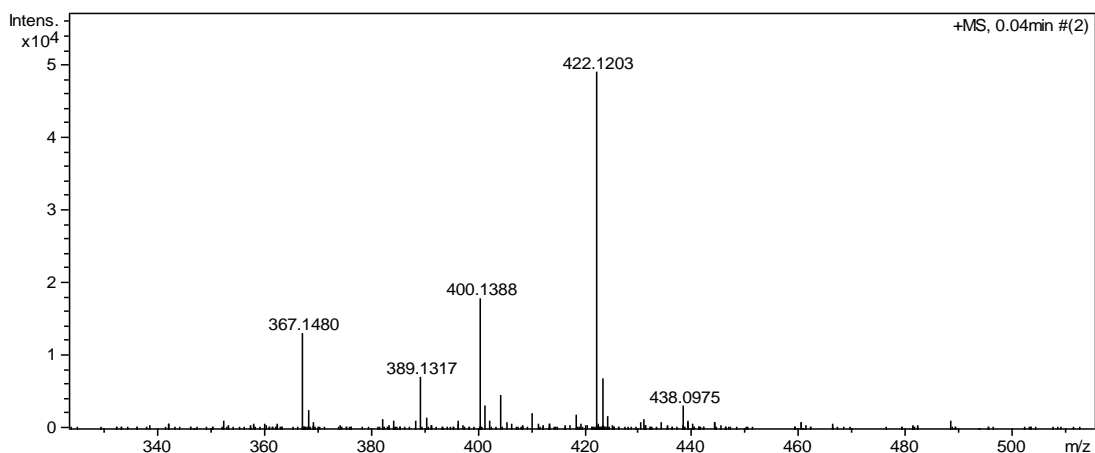

**1-((4-Chlorophenyl)sulfonyl)-3-(3-(4-methoxyphenyl)prop-2-yn-1-yl)-3-methyl-4-methylenepyrrolidine (4f)**

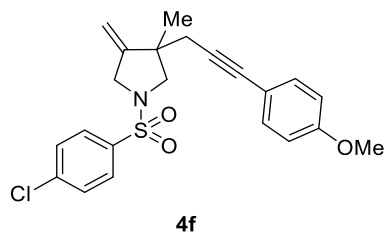

Flash column chromatography on a silica gel (ethyl acetate: petroleum ether, 12:1) gave the product **4f** (83.2 mg, 64% yield) as a yellow oil.

<sup>1</sup>H NMR (CDCl<sub>3</sub>, 400 MHz) δ 7.69 (d, *J* = 8.4 Hz, 2H), 7.41 (d, *J* = 8.4 Hz, 2H), 7.16 (d, *J* = 8.8 Hz, 2H), 6.74 (d, *J* = 8.4 Hz, 2H), 4.90-4.89 (m, 2H), 3.84-3.83 (m, 2H), 3.73 (s, 3H), 3.38 (d, *J* = 9.6 Hz, 1H), 2.98 (d, *J* = 9.6 Hz, 1H), 2.40-2.30 (m, 2H), 1.17 (s, 3H);

<sup>13</sup>C NMR (CDCl<sub>3</sub>, 100 MHz) δ 159.3, 150.3, 139.3, 134.2, 132.8, 129.3, 129.1, 115.3, 113.8, 106.7, 84.5, 82.5, 58.6, 55.2, 52.2, 45.4, 30.0, 23.5;

HRMS Calcd (ESI) m/z for C<sub>22</sub>H<sub>22</sub>ClNNaO<sub>3</sub>S [M + Na]<sup>+</sup>: 438.0901, found: 438.0899.

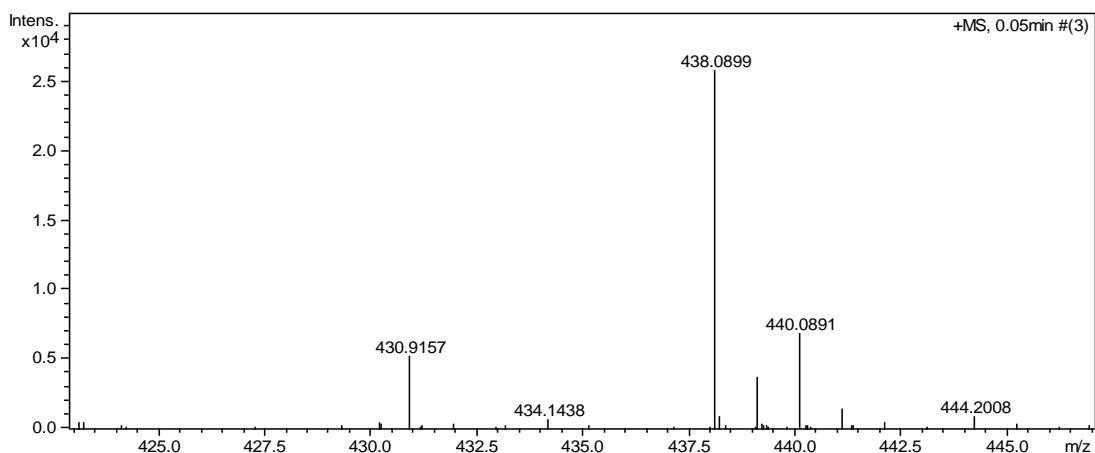

**3-(3-(4-Methoxyphenyl)prop-2-yn-1-yl)-3-methyl-4-methylene-1-((4-(trifluoromethyl)phenyl)sulfonyl)pyrrolidine (4g)**

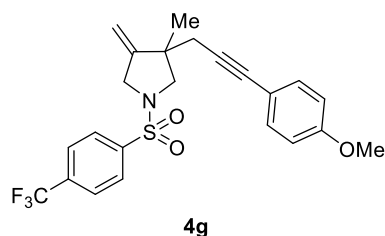

Flash column chromatography on a silica gel (ethyl acetate: petroleum ether, 10:1) gave the product **4g** (67.0 mg, 50% yield) as a brown solid; m.p.: 98-101 °C.

<sup>1</sup>H NMR (CDCl<sub>3</sub>, 400 MHz) δ 7.96 (d, *J* = 8.0 Hz, 2H), 7.78 (d, *J* = 8.4 Hz, 2H), 7.25 (d, *J* = 6.4 Hz, 2H), 6.81 (d, *J* = 8.8 Hz, 2H), 4.98-4.97 (m, 2H), 4.00-3.90 (m, 2H), 3.80 (s, 3H), 3.50 (d, *J* = 9.6 Hz, 1H), 3.07 (d, *J* = 9.6 Hz, 1H), 2.47-2.38 (m, 2H), 1.25 (s, 3H);

<sup>13</sup>C NMR (CDCl<sub>3</sub>, 100 MHz) δ 159.3, 150.0, 139.5, 134.4 (q, *J* = 32.9 Hz), 132.8, 128.1, 126.2 (q, *J* = 3.6 Hz), 123.2 (q, *J* = 271.6 Hz), 115.3, 113.8, 106.9, 84.4, 82.6, 58.7, 55.24, 52.2, 45.5, 29.9, 23.4;

<sup>19</sup>F NMR (CDCl<sub>3</sub>, 376 MHz) -63.0;

HRMS Calcd (ESI) m/z for C<sub>23</sub>H<sub>22</sub>F<sub>3</sub>NNaO<sub>3</sub>S [M + Na]<sup>+</sup>: 472.1165, found: 472.1174.



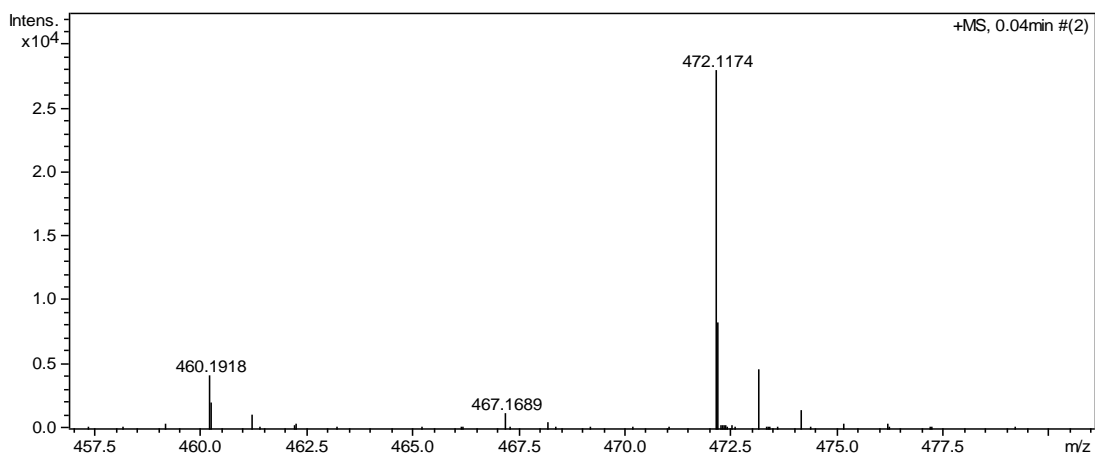

**3-(3-(4-Methoxyphenyl)prop-2-yn-1-yl)-3-methyl-4-methylene-1-((4-(trifluoromethoxy)phenyl)sulfonyl)pyrrolidine (4h)**

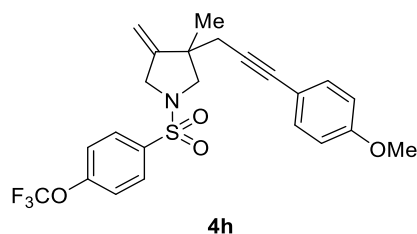

Flash column chromatography on a silica gel (ethyl acetate: petroleum ether, 10: 1) gave the product **4h** (84.0 mg, 60% yield) as a yellow solid; M.p.: 70-73 °C.

<sup>1</sup>H NMR (CDCl<sub>3</sub>, 400 MHz) δ 7.89 (d, *J* = 8.8 Hz, 2H), 7.34 (d, *J* = 8.0 Hz, 2H), 7.26 (d, *J* = 8.8 Hz, 2H), 6.82 (d, *J* = 8.8 Hz, 2H), 4.99-4.98 (m, 2H), 3.98-3.89 (m, 2H), 3.80 (s, 3H), 3.48 (d, *J* = 9.2 Hz, 1H), 3.07 (d, *J* = 9.2 Hz, 1H), 2.47-2.38 (m, 2H), 1.26 (s, 3H);

<sup>13</sup>C NMR (CDCl<sub>3</sub>, 100 MHz) δ 159.3, 152.3, 152.2, 150.2, 134.2, 132.8, 129.8, 120.8, 120.2 (q, *J* = 258.2 Hz), 115.3, 113.8, 106.8, 84.5, 82.5, 58.7, 55.2, 52.2, 45.4, 30.0, 23.4;

<sup>19</sup>F NMR (CDCl<sub>3</sub>, 376 MHz) -57.6;

HRMS Calcd (ESI) *m/z* for C<sub>23</sub>H<sub>22</sub>F<sub>3</sub>NNaO<sub>4</sub>S [M + Na]<sup>+</sup>: 488.1114, found: 488.1120.

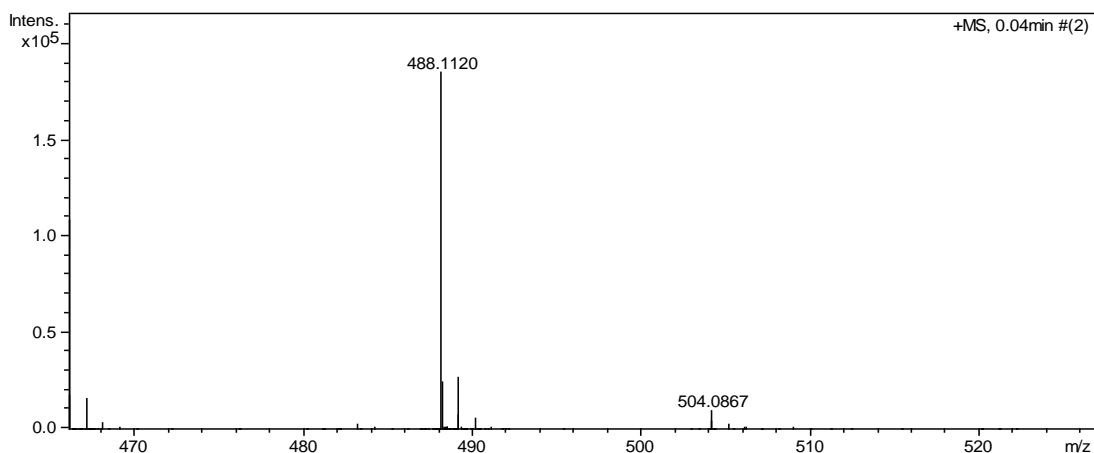

**3-(3-(4-Methoxyphenyl)prop-2-yn-1-yl)-3-methyl-4-methylene-1-(thiophen-2-ylsulfonyl)pyrrolidine (4i)**

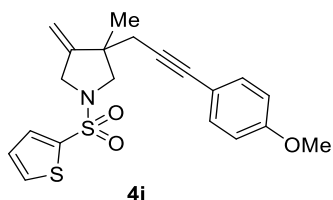

Flash column chromatography on a silica gel (ethyl acetate: petroleum ether, 8:1) gave the product **4i** (83.8 mg, 72% yield) as a yellow oil.

<sup>1</sup>H NMR (CDCl<sub>3</sub>, 400 MHz) δ 7.61-7.58 (m, 2H), 7.28 (d, *J* = 8.8 Hz, 2H), 7.14-7.12 (m, 1H), 6.81 (d, *J* = 8.8 Hz, 2H), 4.99-4.97 (m, 2H), 4.04-3.93 (m, 2H), 3.80 (s, 3H), 3.51 (d, *J* = 9.6 Hz, 1H), 3.10 (d, *J* = 9.6 Hz, 1H), 2.48-2.38 (m, 2H), 1.25 (s, 3H);

<sup>13</sup>C NMR (CDCl<sub>3</sub>, 100 MHz) δ 159.2, 150.3, 135.6, 132.9, 132.5, 132.0, 127.6, 115.4, 113.8, 106.7, 84.6, 82.4, 58.8, 55.2, 52.4, 45.5, 30.0, 23.4;

HRMS Calcd (ESI) m/z for C<sub>20</sub>H<sub>21</sub>NNaO<sub>3</sub>S<sub>2</sub> [M + Na]<sup>+</sup>: 410.0855, found: 410.0850.

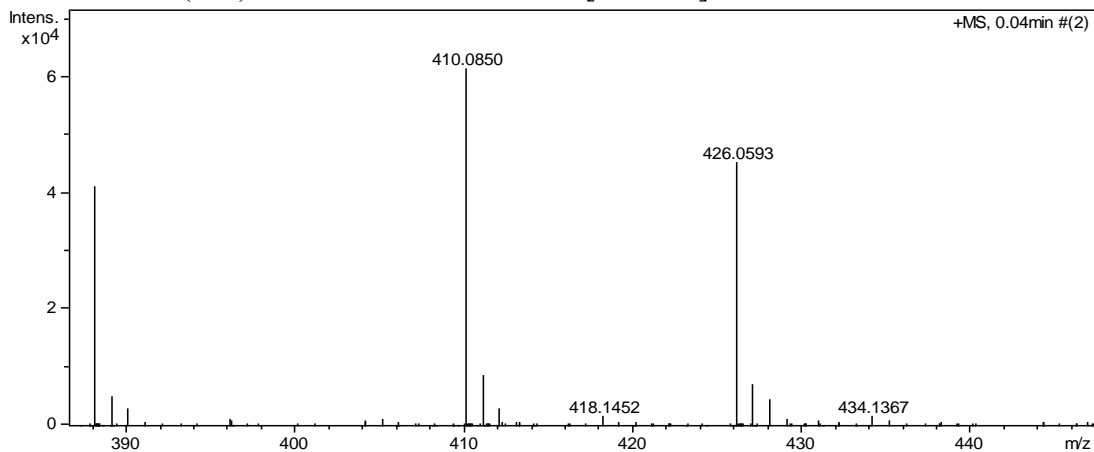

**3-(3-(4-Methoxyphenyl)prop-2-yn-1-yl)-3-methyl-4-methylene-1-(methylsulfonyl)**

### pyrrolidine (4j)

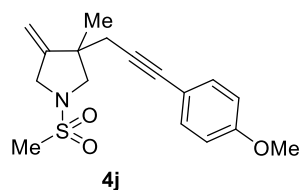

Flash column chromatography on a silica gel (ethyl acetate: petroleum ether, 4: 1) gave the product **4j** (30.7 mg, 33% yield) as a brown solid; m.p.: 57-60 °C.

$^1\text{H NMR}$  ( $\text{CDCl}_3$ , 400 MHz)  $\delta$  7.32 (d,  $J = 8.4$  Hz, 2H), 6.81 (d,  $J = 8.4$  Hz, 2H), 5.06-5.05 (m, 2H), 4.11-4.02 (m, 2H), 3.79 (s, 3H), 3.55 (d,  $J = 9.6$  Hz, 1H), 3.20 (d,  $J = 9.6$  Hz, 1H), 2.85 (s, 3H), 2.62-2.50 (m, 2H), 1.34 (s, 3H);

$^{13}\text{C NMR}$  ( $\text{CDCl}_3$ , 100 MHz)  $\delta$  159.3, 150.6, 132.9, 115.4, 113.9, 106.8, 84.6, 82.5, 58.7, 55.3, 52.2, 45.6, 34.7, 30.1, 23.4;

**HRMS** Calcd (ESI)  $m/z$  for  $\text{C}_{17}\text{H}_{21}\text{NNaO}_3\text{S}$   $[\text{M} + \text{Na}]^+$ :342.1134, found:342.1120.

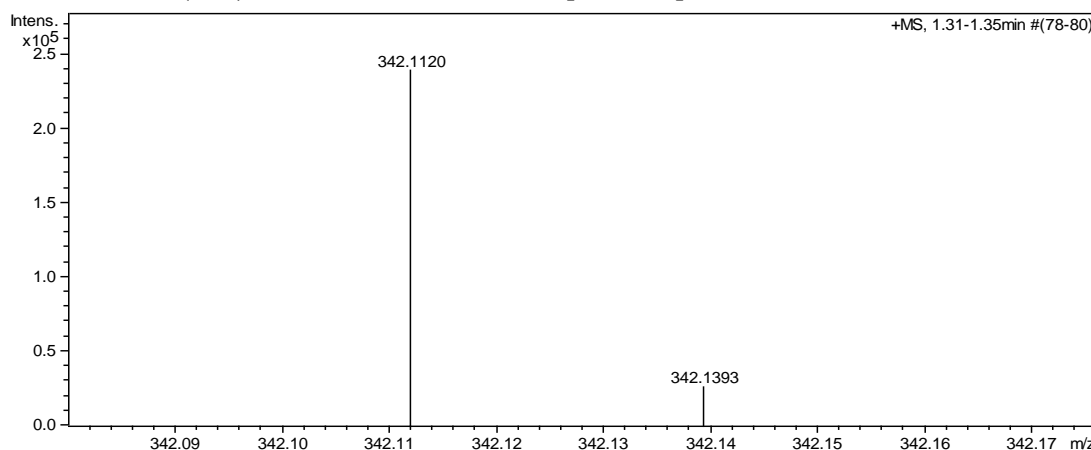

### 3-(3-(4-Methoxyphenyl)prop-2-yn-1-yl)-4-methylene-1-tosylpyrrolidine (4k)

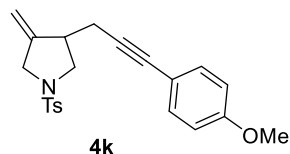

Flash column chromatography on a silica gel (ethyl acetate: petroleum ether, 8:1) gave the product **4k** (30.0 mg, 26% yield) as a yellow oil.

$^1\text{H NMR}$  ( $\text{CDCl}_3$ , 400 MHz)  $\delta$  7.72 (d,  $J = 8.0$  Hz, 2H), 7.31 (d,  $J = 8.0$  Hz, 2H), 7.26-7.24 (m, 2H), 6.80 (d,  $J = 8.8$  Hz, 2H), 5.03-5.00 (m, 2H), 3.90-3.80 (m, 5H), 3.59-3.55 (m, 1H), 3.19-3.15 (m, 1H), 2.92-2.86 (m, 1H), 2.58-2.52 (m, 1H), 2.44-2.37 (m, 4H);

$^{13}\text{C}$  NMR ( $\text{CDCl}_3$ , 100 MHz)  $\delta$  159.3, 146.4, 143.7, 132.9, 132.5, 129.7, 127.9, 115.4, 113.8, 107.8, 85.2, 81.7, 55.3, 53.0, 52.3, 42.2, 22.8, 21.5;

HRMS Calcd (ESI)  $m/z$  for  $\text{C}_{22}\text{H}_{23}\text{NNaO}_3\text{S}$   $[\text{M} + \text{Na}]^+$ : 404.1291, found: 404.1289.

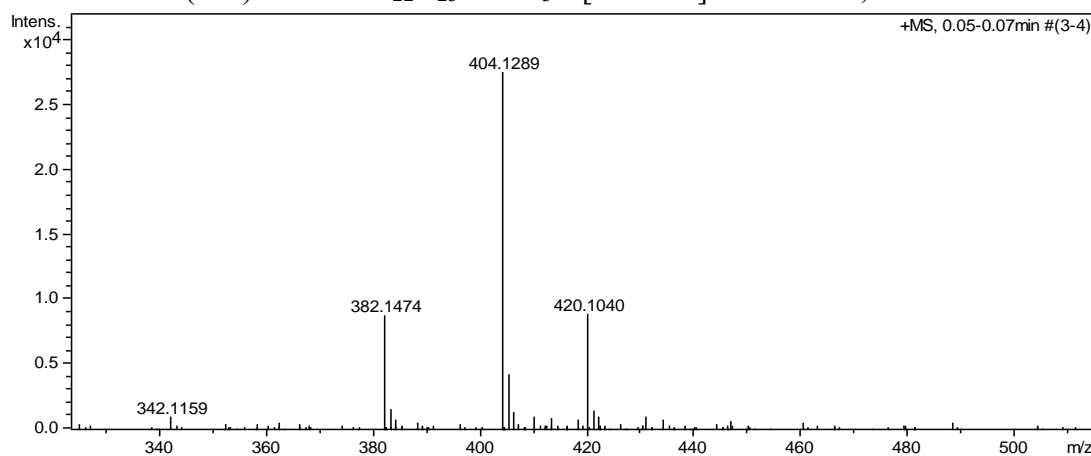

#### 4-(3-(4-Methoxyphenyl)prop-2-yn-1-yl)-4-methyl-1-tosylpyrrolidin-3-one (5)

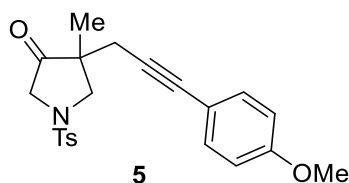

Flash column chromatography on a silica gel (ethyl acetate: petroleum ether, 5:1) gave the product **5** (38.5 mg, 48% yield) as a yellow oil.

$^1\text{H}$  NMR ( $\text{CDCl}_3$ , 400 MHz)  $\delta$  7.71 (d,  $J = 8.4$  Hz, 2H), 7.32 (d,  $J = 8.0$  Hz, 2H), 7.16 (d,  $J = 8.8$  Hz, 2H), 6.78 (d,  $J = 8.8$  Hz, 2H), 3.80-3.72 (m, 4H), 3.57-3.54 (m, 1H), 3.46-3.39 (m, 2H), 2.61-2.56 (m, 1H), 2.47-2.42 (m, 1H), 2.39 (s, 3H), 1.26 (s, 3H);

$^{13}\text{C}$  NMR ( $\text{CDCl}_3$ , 100 MHz)  $\delta$  210.9, 159.4, 144.3, 132.9, 131.3, 129.9, 128.0, 114.8, 113.8, 83.3, 82.6, 55.9, 55.3, 53.7, 49.7, 25.8, 21.6, 20.9;

HRMS Calcd (ESI)  $m/z$  for  $\text{C}_{22}\text{H}_{23}\text{NNaO}_4\text{S}$   $[\text{M} + \text{Na}]^+$ : 420.1240, found: 420.1236.

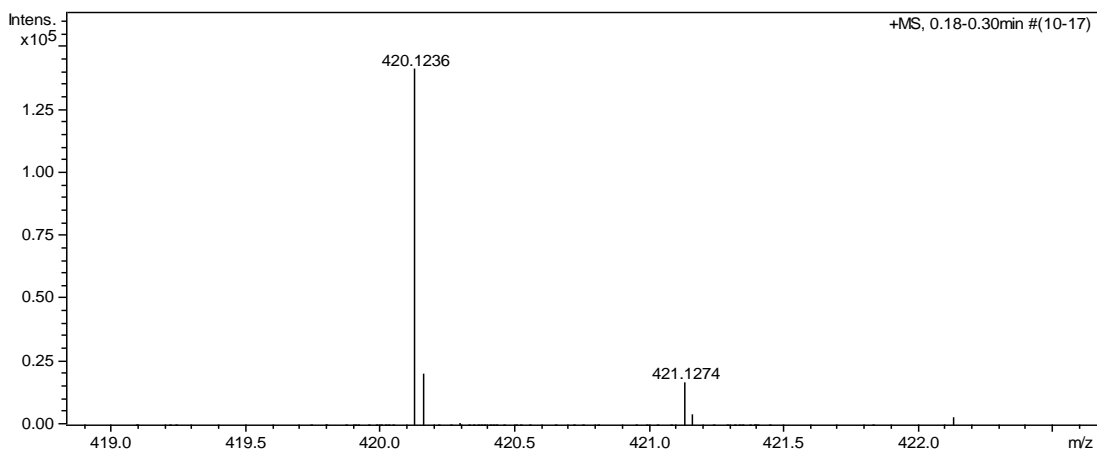

### 3-(3-(4-Methoxyphenyl)prop-2-yn-1-yl)-3-methyl-4-methylenepyrrolidine (6)

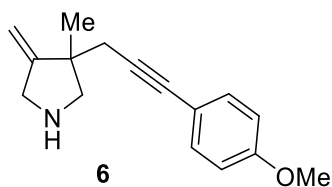

Flash column chromatography on a silica gel (ethyl acetate: Methanol, 10:1) gave the product **6** (39.6 mg, 82% yield) as a white oil.

$^1\text{H NMR}$  (  $(\text{CD}_3)_2\text{SO}$ , 400 MHz)  $\delta$  7.31 (d,  $J = 8.4$  Hz, 2H), 6.90 (d,  $J = 8.4$  Hz, 2H), 4.92 (s, 2H), 3.75 (s, 3H), 3.55-3.44 (m, 2H), 2.97 (d,  $J = 10.8$  Hz, 1H), 2.64 (d,  $J = 10.8$  Hz, 1H), 2.54-2.40 (m, 2H), 1.18 (s, 3H);

$^{13}\text{C NMR}$  (  $(\text{CD}_3)_2\text{SO}$ , 100 MHz)  $\delta$  159.0, 157.2, 132.7, 115.3, 114.2, 103.6, 86.9, 81.4, 58.8, 55.3, 52.1, 45.1, 29.6, 23.9;

**HRMS** Calcd (ESI) m/z for  $\text{C}_{16}\text{H}_{19}\text{NNaO}$   $[\text{M} + \text{Na}]^+$ : 264.1359, found: 264.1338.

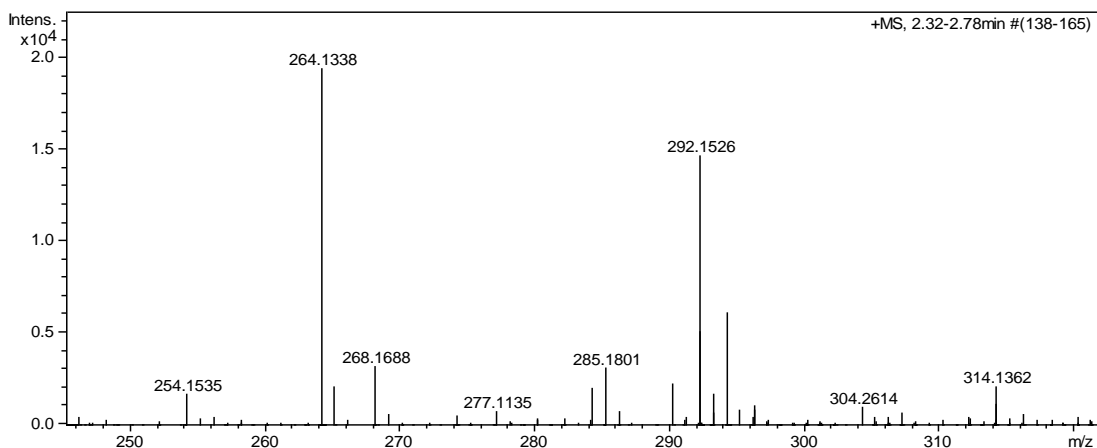

#### 4. Single Crystal X-Ray Diffraction

Crystals of **3b** were obtained by slow diffusion from a solution of the compounds in  $\text{CHCl}_3$  layered with petroleum ether at room temperature for several days (Figure S1). Crystal data and details of the structure determination are presented in Table S2.

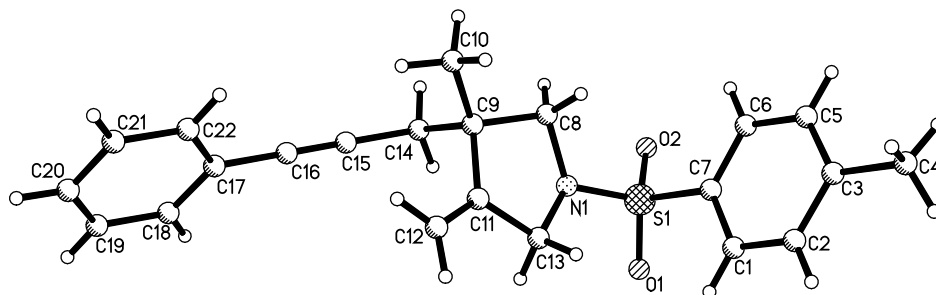

Figure S1. Crystal structure of **3b**

**Table S2** The single crystal data of compounds **3b**

| Phase                                                | <b>3b</b>                                                         |
|------------------------------------------------------|-------------------------------------------------------------------|
| Identification code                                  | XSJ20220725                                                       |
| Empirical formula                                    | C <sub>22</sub> H <sub>23</sub> NO <sub>2</sub> S                 |
| Formula weight                                       | 365.47                                                            |
| Temperature/K                                        | 296(2)                                                            |
| Wavelength/ Å                                        | 0.71073                                                           |
| Crystal system                                       | Monoclinic                                                        |
| Space group                                          | P2(1)/n                                                           |
| <i>a</i> / Å                                         | 16.6490(11)                                                       |
| <i>b</i> / Å                                         | 6.3815(5)                                                         |
| <i>c</i> / Å                                         | 18.6164(12)                                                       |
| $\alpha$ (°)                                         | 90                                                                |
| $\beta$ (°)                                          | 95.783(2)                                                         |
| $\gamma$ (°)                                         | 90                                                                |
| Volume (Å <sup>3</sup> )                             | 1967.8(2)                                                         |
| <i>Z</i>                                             | 4                                                                 |
| Calculated density (mg·m <sup>-3</sup> )             | 1.234                                                             |
| Absorption coefficient (mm <sup>-1</sup> )           | 0.180                                                             |
| <i>F</i> (000)                                       | 776                                                               |
| Crystal size (mm)                                    | 0.280 x 0.240 x 0.200                                             |
| $\theta$ range for data collection (deg)             | 3.130 to 25.997                                                   |
| Limiting indices                                     | -20 ≤ <i>h</i> ≤ 20,<br>-7 ≤ <i>k</i> ≤ 7,<br>-22 ≤ <i>l</i> ≤ 22 |
| Reflections collected/unique                         | 26735 / 3844 [R(int) = 0.0520]                                    |
| Completeness to theta                                | 99.8 %                                                            |
| Max. and min. transmission                           | 0.7456 and 0.6907                                                 |
| Refinement method                                    | Full-matrix least-squares on F <sup>2</sup>                       |
| Data/restraints/parameters                           | 3844 / 0 / 237                                                    |
| Goodness-of-fit on F <sup>2</sup>                    | 1.040                                                             |
| Final <i>R</i> indices [I > 2σ(I)]                   | R1 = 0.0479, wR2 = 0.1058                                         |
| <i>R</i> indices (all data)                          | R1 = 0.0827, wR2 = 0.1214                                         |
| Largest diff. peak and hole / (e · Å <sup>-3</sup> ) | 0.213 and -0.239                                                  |

## 5. References

1. J.-B. Qiao, Y.-Q. Zhang, Q.-W. Yao, Z.-Z. Zhao, X. Peng and X.-Z. Shu, *J. Am. Chem. Soc.*, 2021, **143**, 12961–7157.
2. C. H. Oh, H. R. Sung, S. J. Park and K. H. Ahn, *J. Org. Chem.*, 2002, **67**, 7155–7157.
3. C.-W. Lee, K. S. Oh, K. S. Kim and K. H. Ahn, *Org. Lett.*, 2000, **2**, 1213–1216.
4. A. Padwa, H. Nimmesgern and G. S. K. Wong, *Tetrahedron Lett.*, 1985, 957-960.
5. W.-B. Xu, M. Sun, M. Shu and C. Li, *J. Am. Chem. Soc.*, 2021. **143**, 8255–8260.

## 6. Copies of NMR Spectra



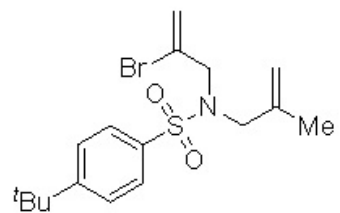

**1c** <sup>1</sup>H NMR (400 MHz, CDCl<sub>3</sub>)

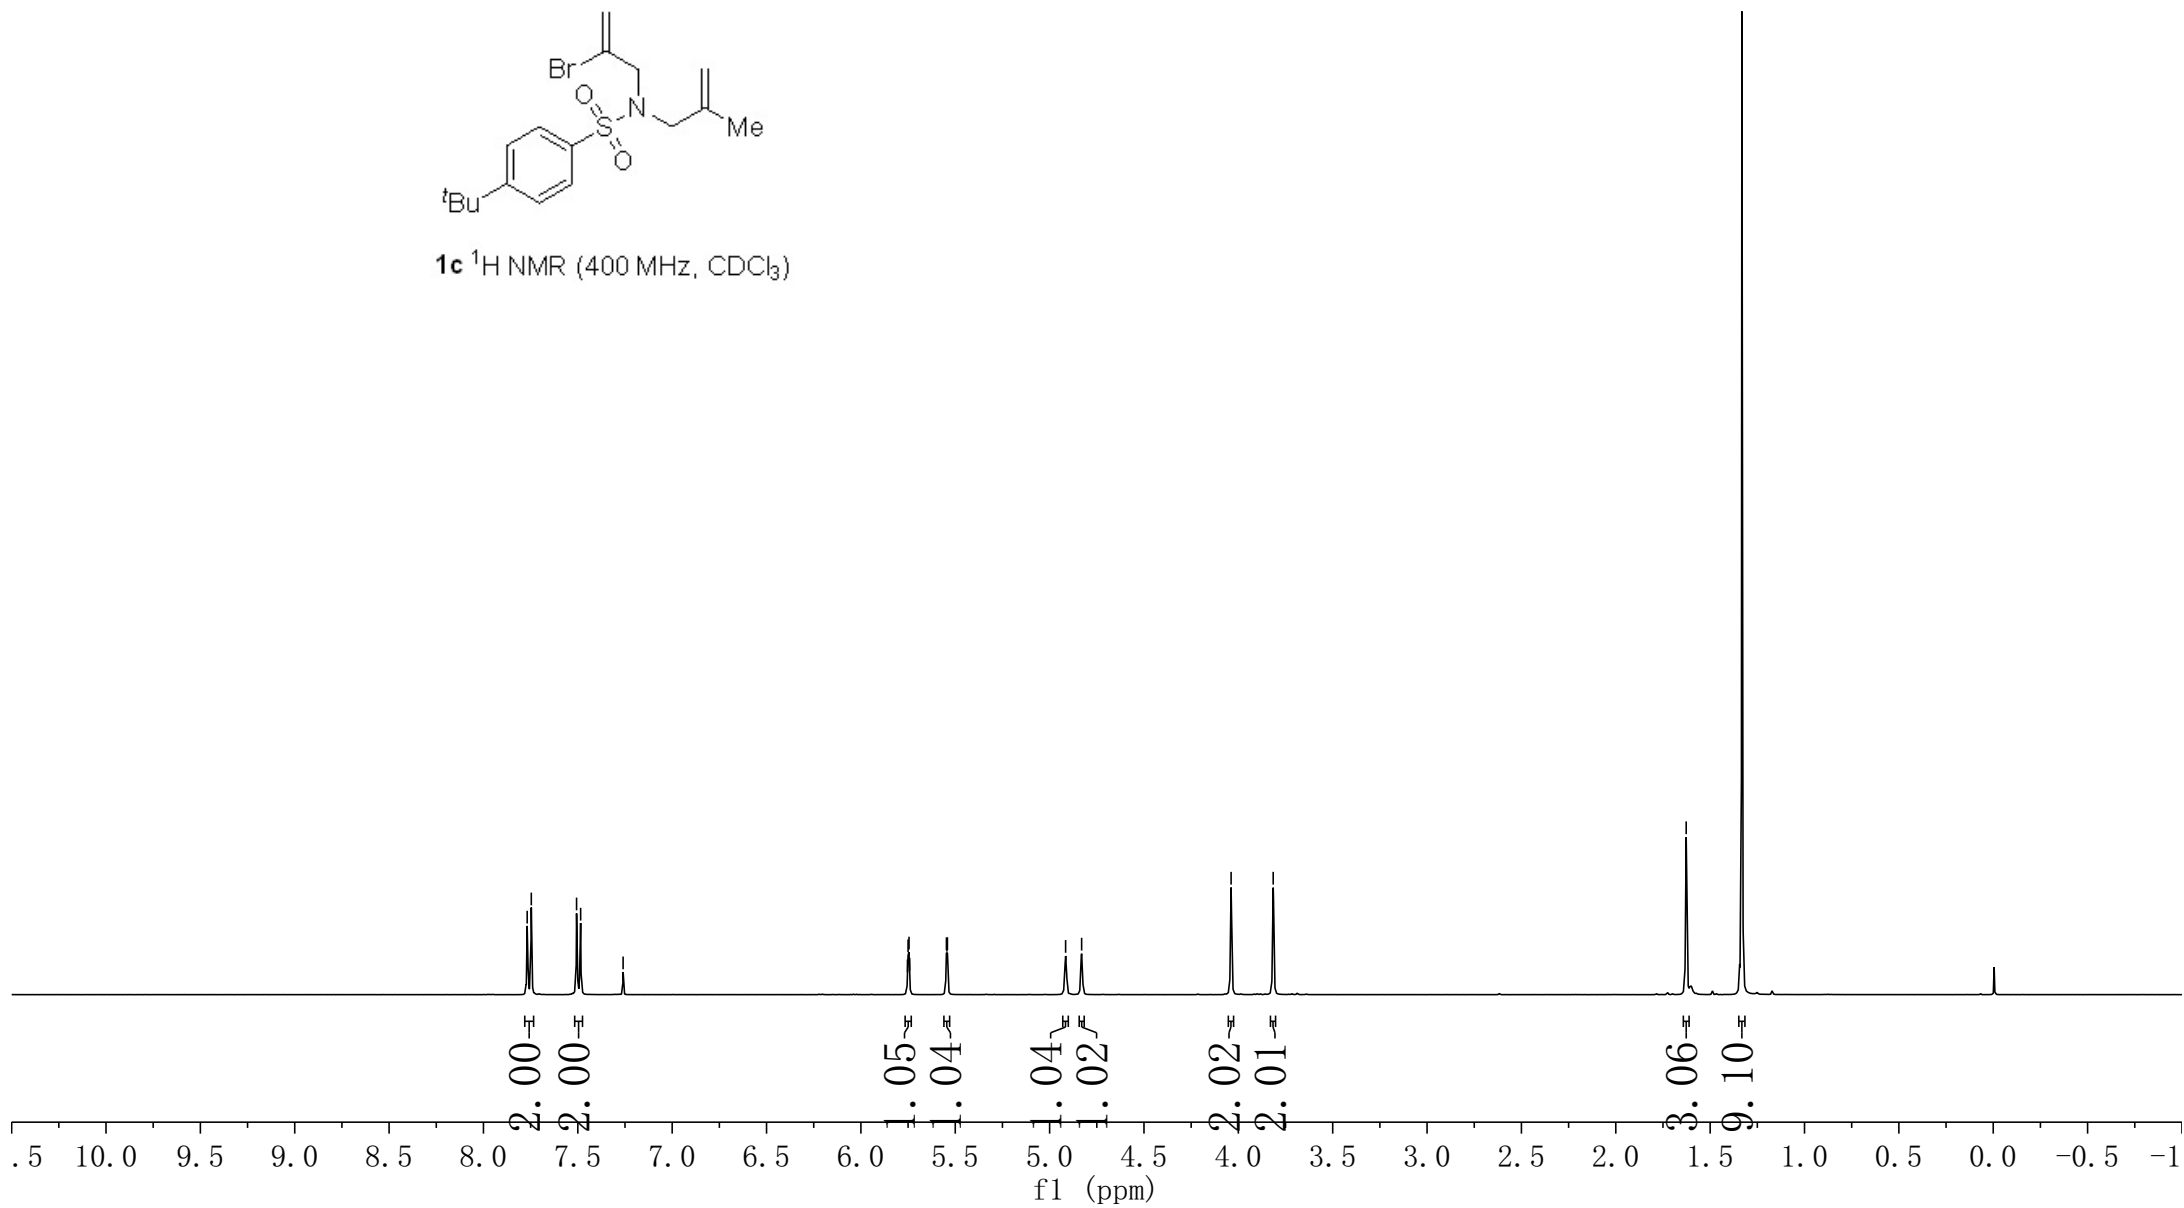

-156.473

~139.478

~137.111

~127.658

~127.183

~125.862

~119.416

~115.371

~77.319

~77.000

~76.682

~53.951

~53.533

~35.097

~31.043

~19.828

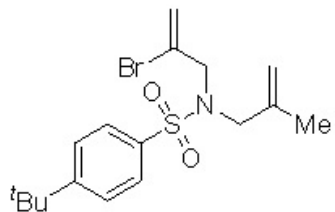

**1c** <sup>13</sup>C NMR (100 MHz, CDCl<sub>3</sub>)

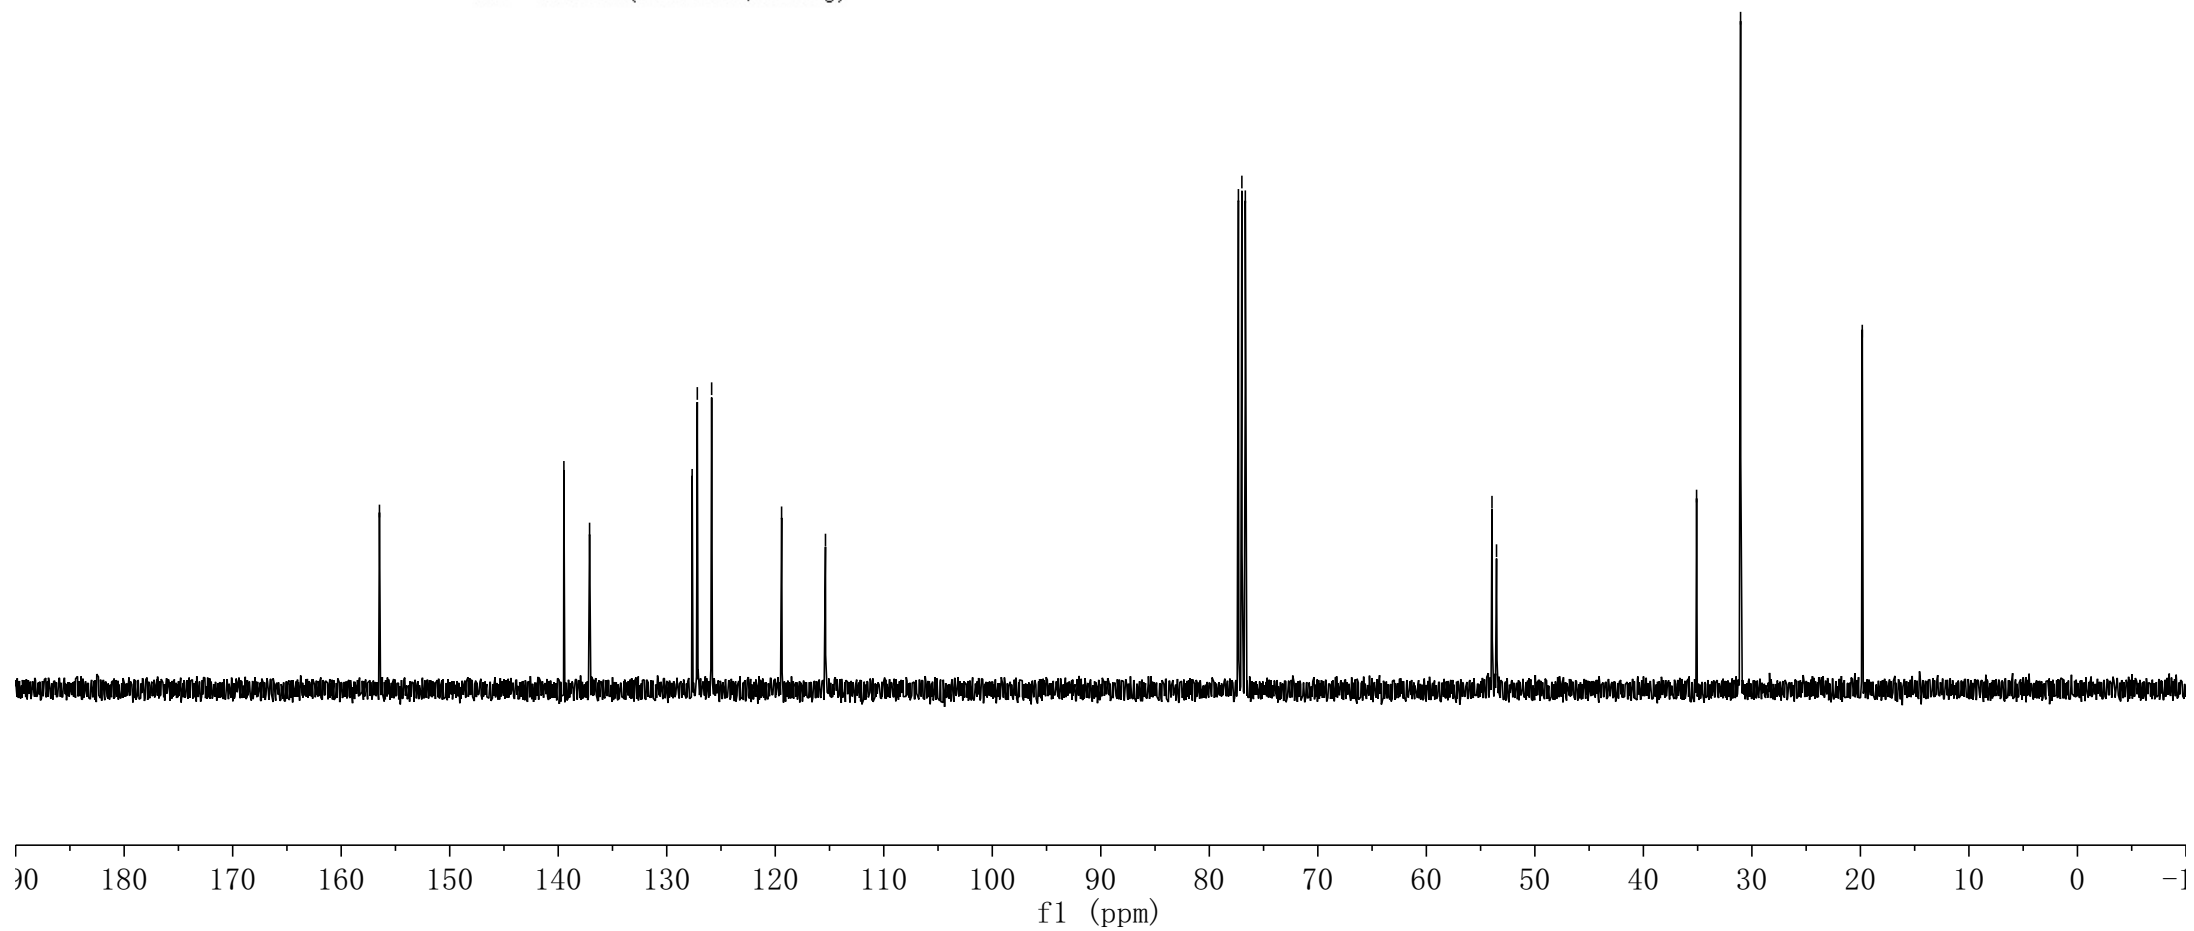

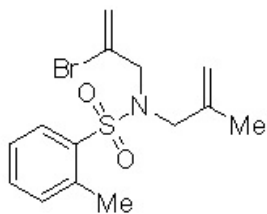

**1d** <sup>1</sup>H NMR (400 MHz, CDCl<sub>3</sub>)

7.917  
7.897  
7.373  
7.354  
7.335  
7.234  
7.212  
7.192  
5.690  
5.688  
5.685  
5.683  
5.466  
4.870  
4.806

~3.994  
~3.833

-2.537

-1.490

-0.000

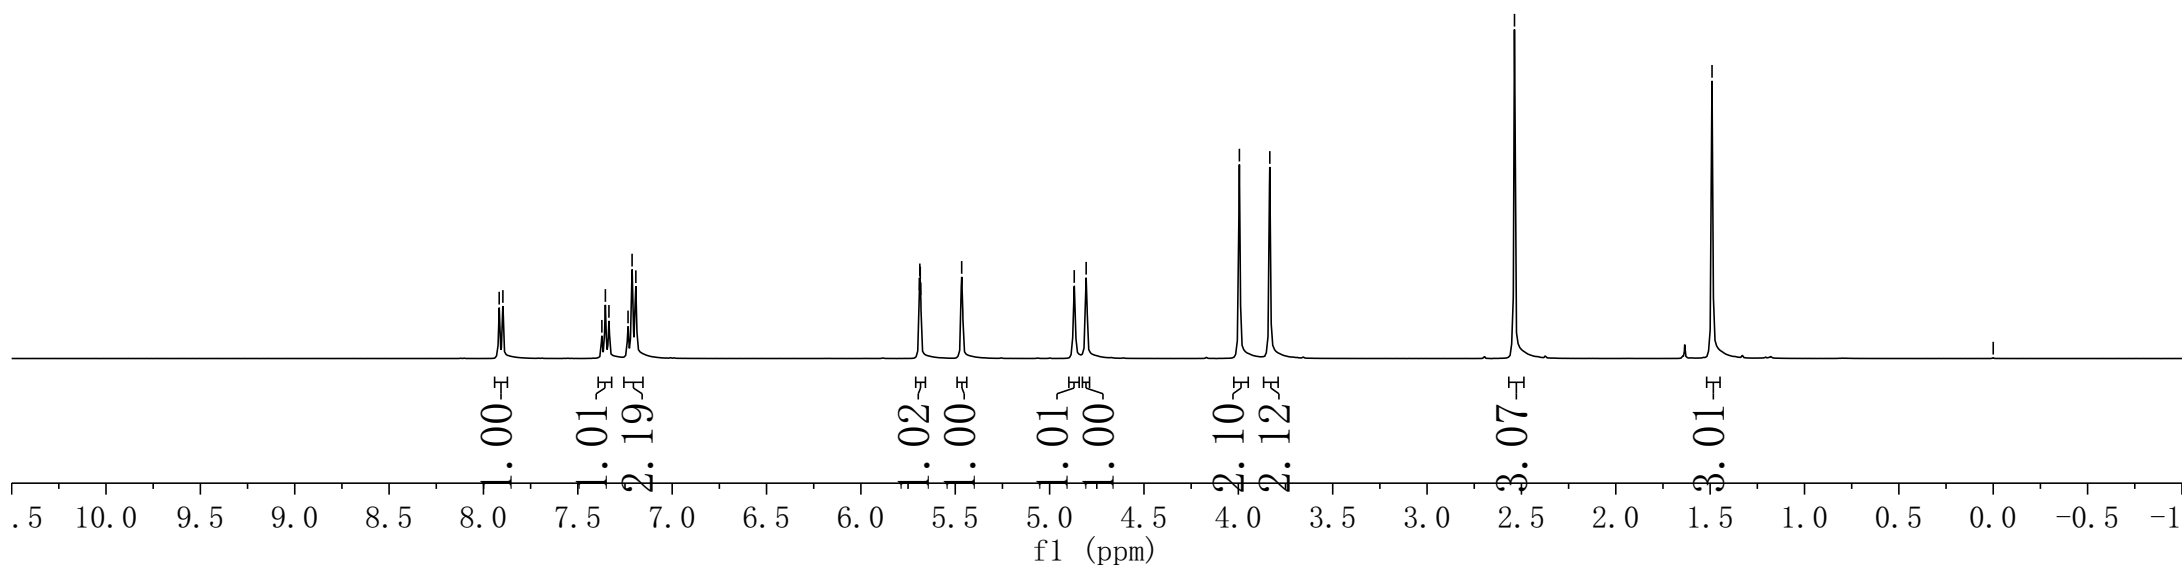

139.126  
137.844  
137.642  
132.791  
132.474  
130.059  
127.163  
125.923  
120.261  
115.735

77.318  
77.000  
76.681

53.036  
52.345

20.598  
19.632

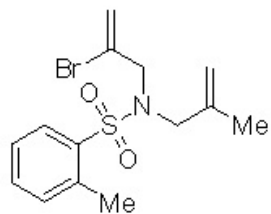

1d <sup>13</sup>C NMR (100 MHz, CDCl<sub>3</sub>)

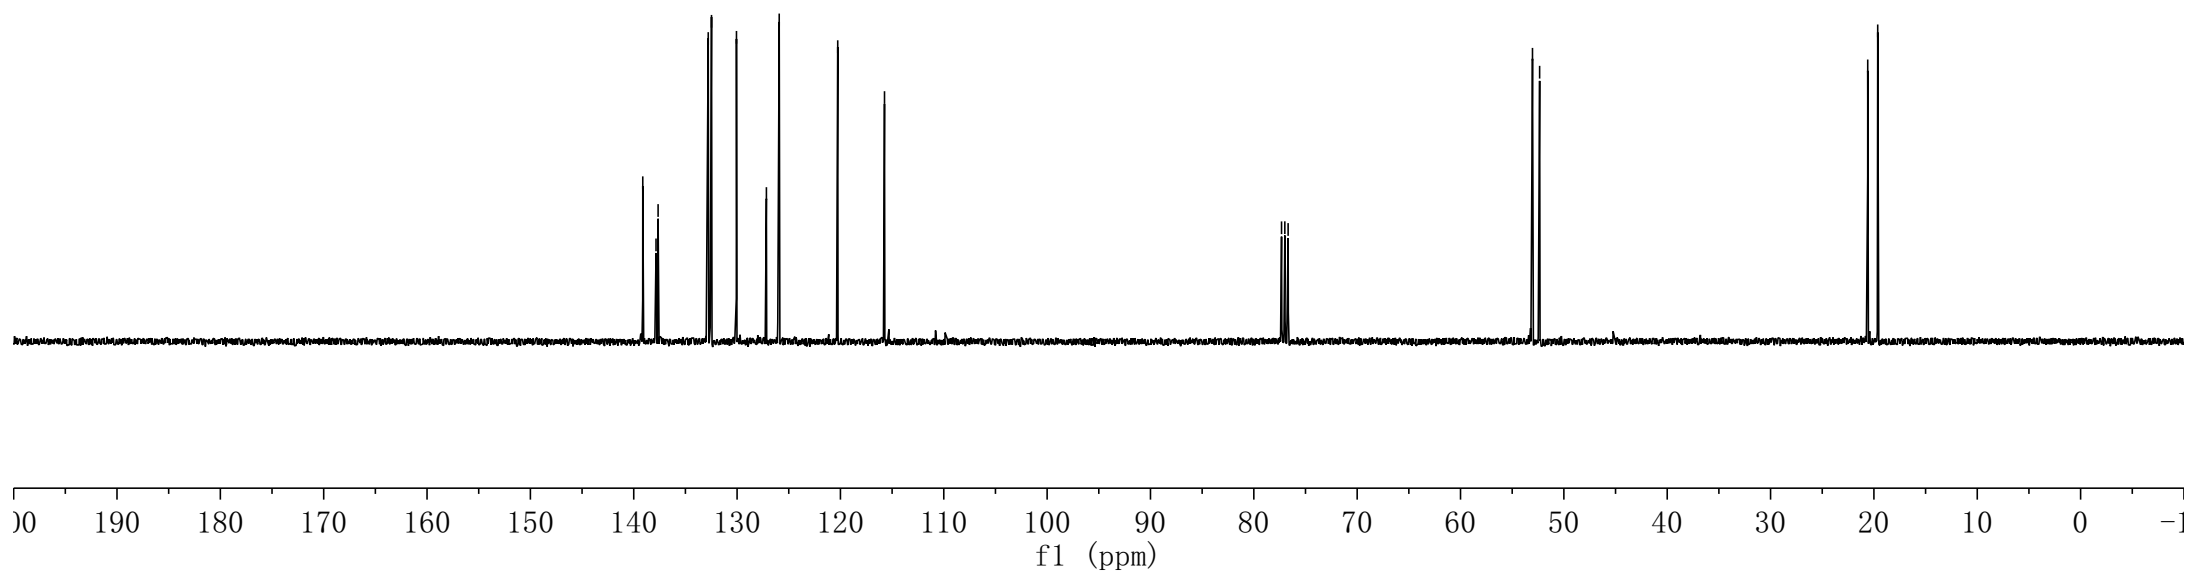

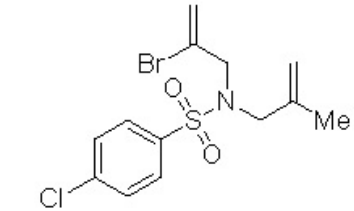

**1f** <sup>1</sup>H NMR (400 MHz, CDCl<sub>3</sub>)

7.790  
7.769  
7.478  
7.456  
7.260  
5.754  
5.751  
5.749  
5.748  
5.746  
5.743  
5.566  
5.563  
5.560  
4.949  
4.843

4.069  
3.849

1.648

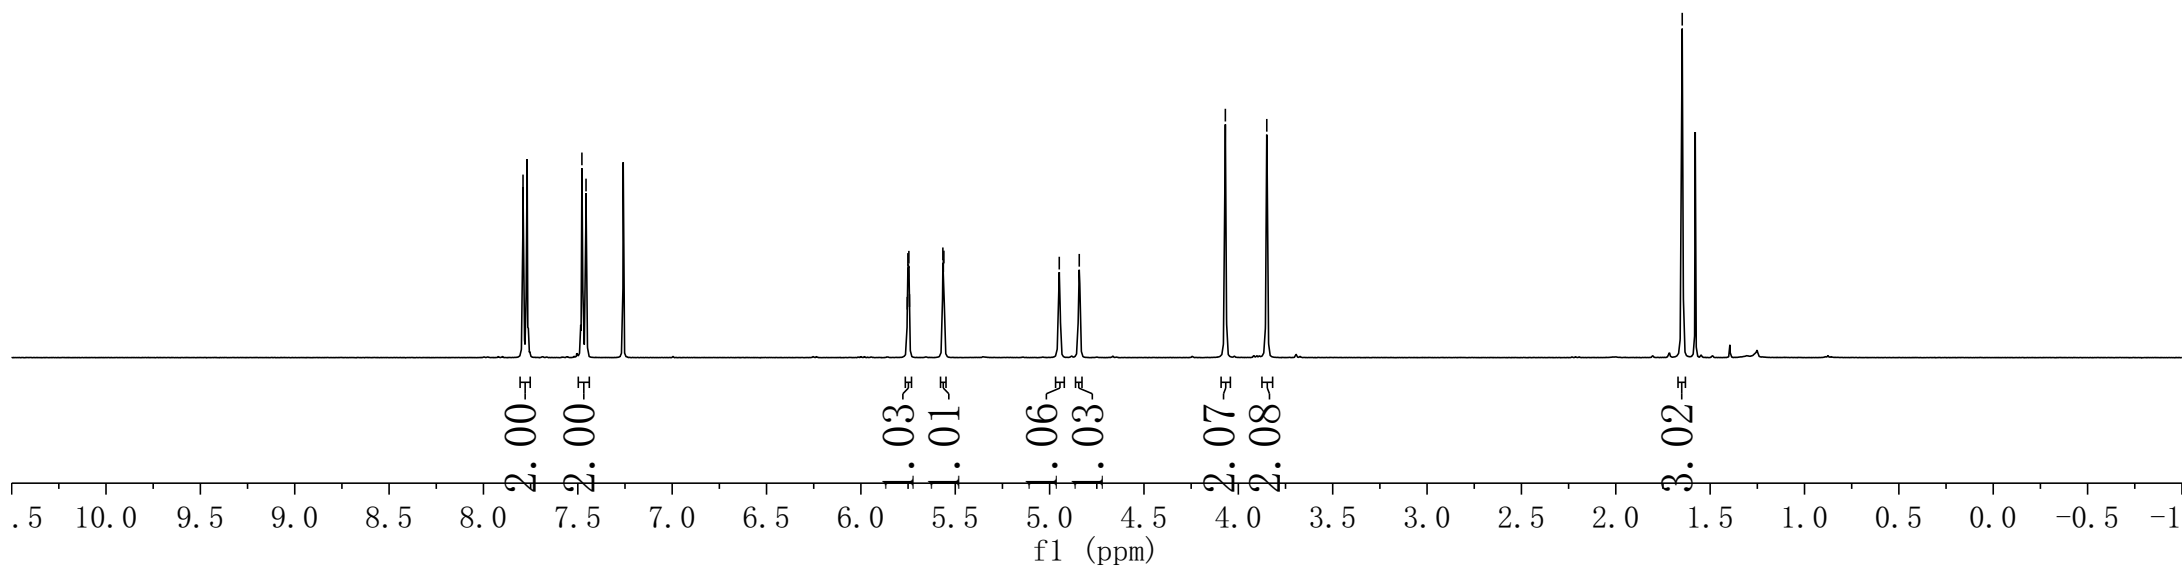

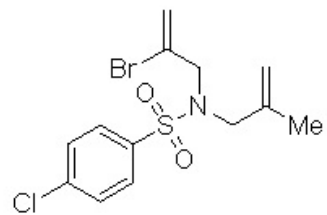

1f <sup>13</sup>C NMR (100 MHz, CDCl<sub>3</sub>)

139.091  
139.059  
138.988  
129.179  
128.753  
127.333  
120.169  
115.600

77.318  
77.000  
76.682

53.820  
53.311

19.868

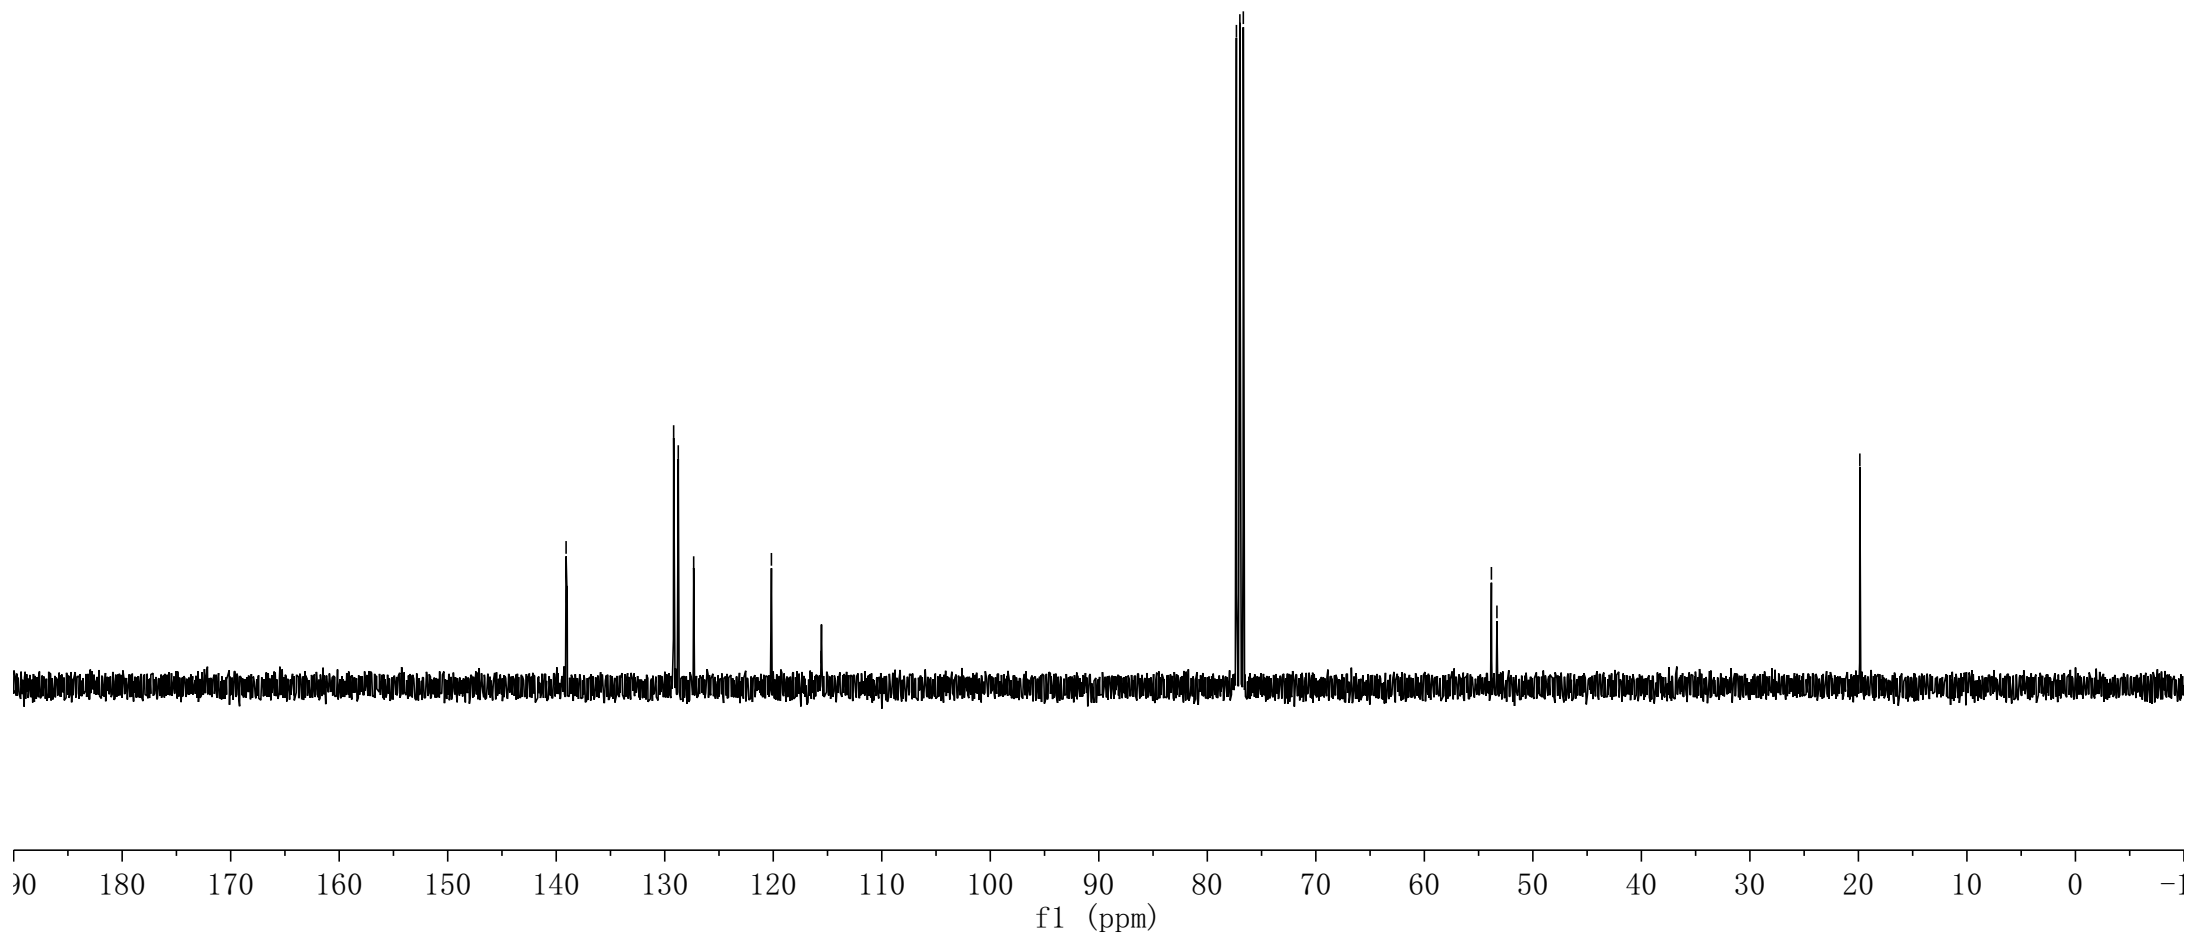

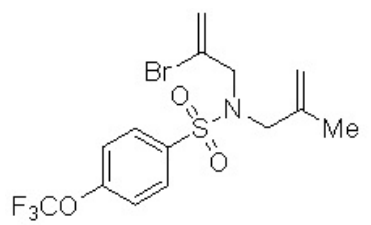

**1h** <sup>1</sup>H NMR (400 MHz, CDCl<sub>3</sub>)

7.896  
7.873  
7.315  
7.292  
7.260  
5.737  
5.734  
5.732  
5.729  
5.726  
5.536  
5.534  
5.531  
4.921  
4.823  
-4.063  
-3.846

-1.619

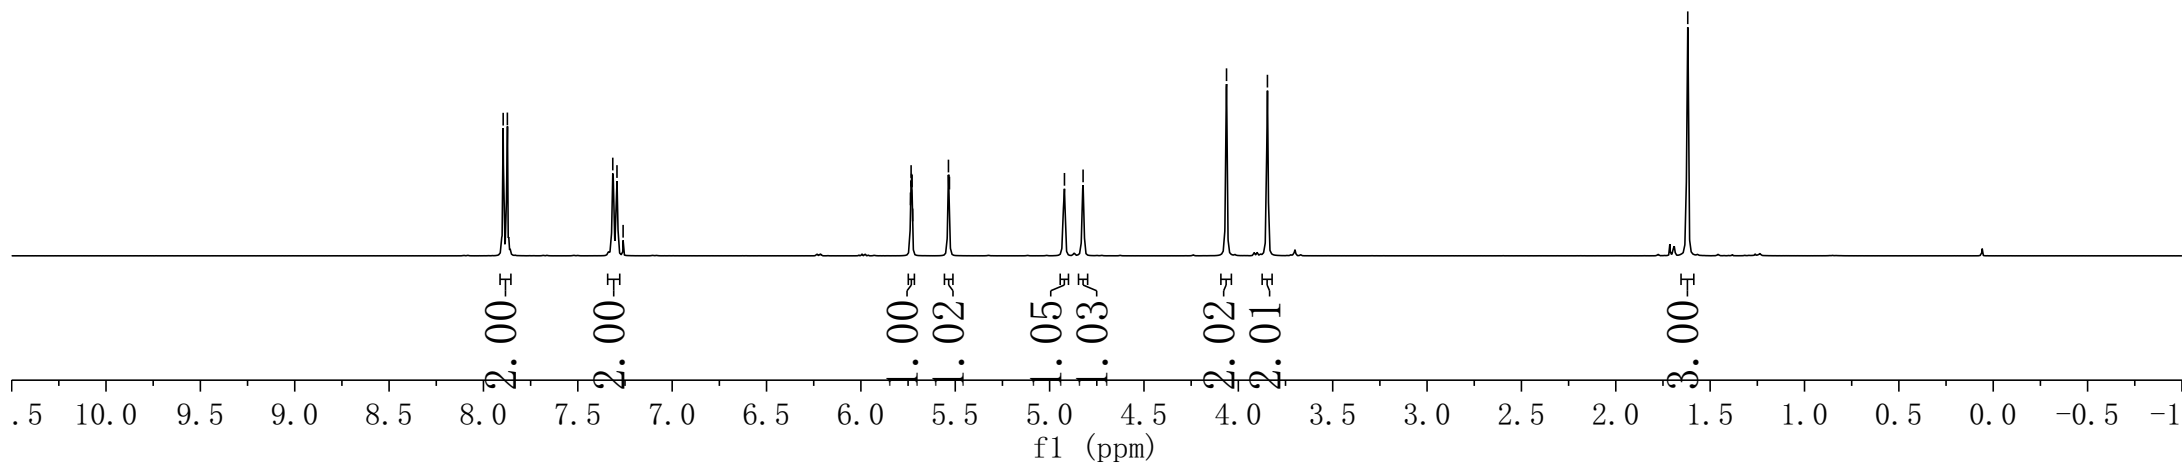

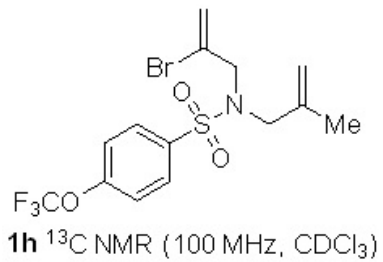

152.013  
139.022  
138.871  
129.418  
127.257  
124.037  
121.458  
120.760  
120.266  
118.879  
116.297  
115.528

77.318  
77.000  
76.682

53.812  
53.284

19.771

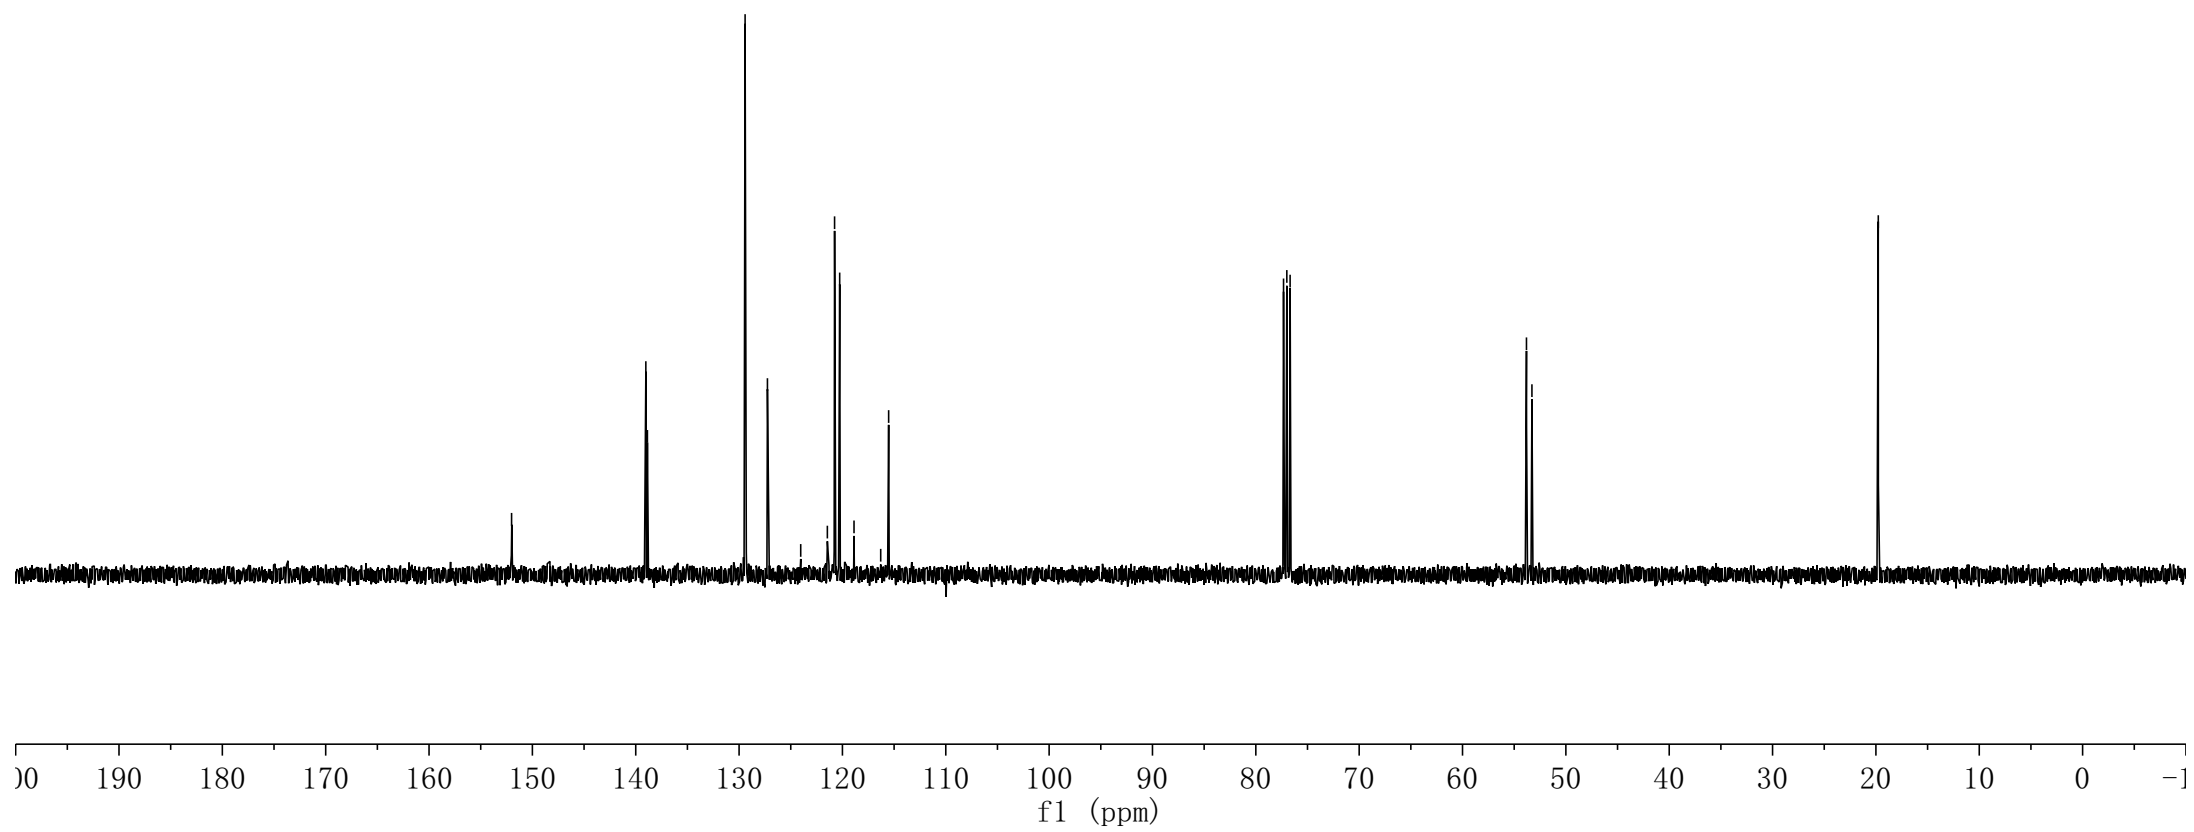



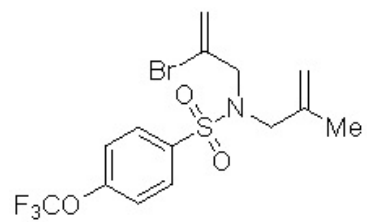

1h  $^{19}\text{F}$  NMR (376 MHz,  $\text{CDCl}_3$ )

--57.747

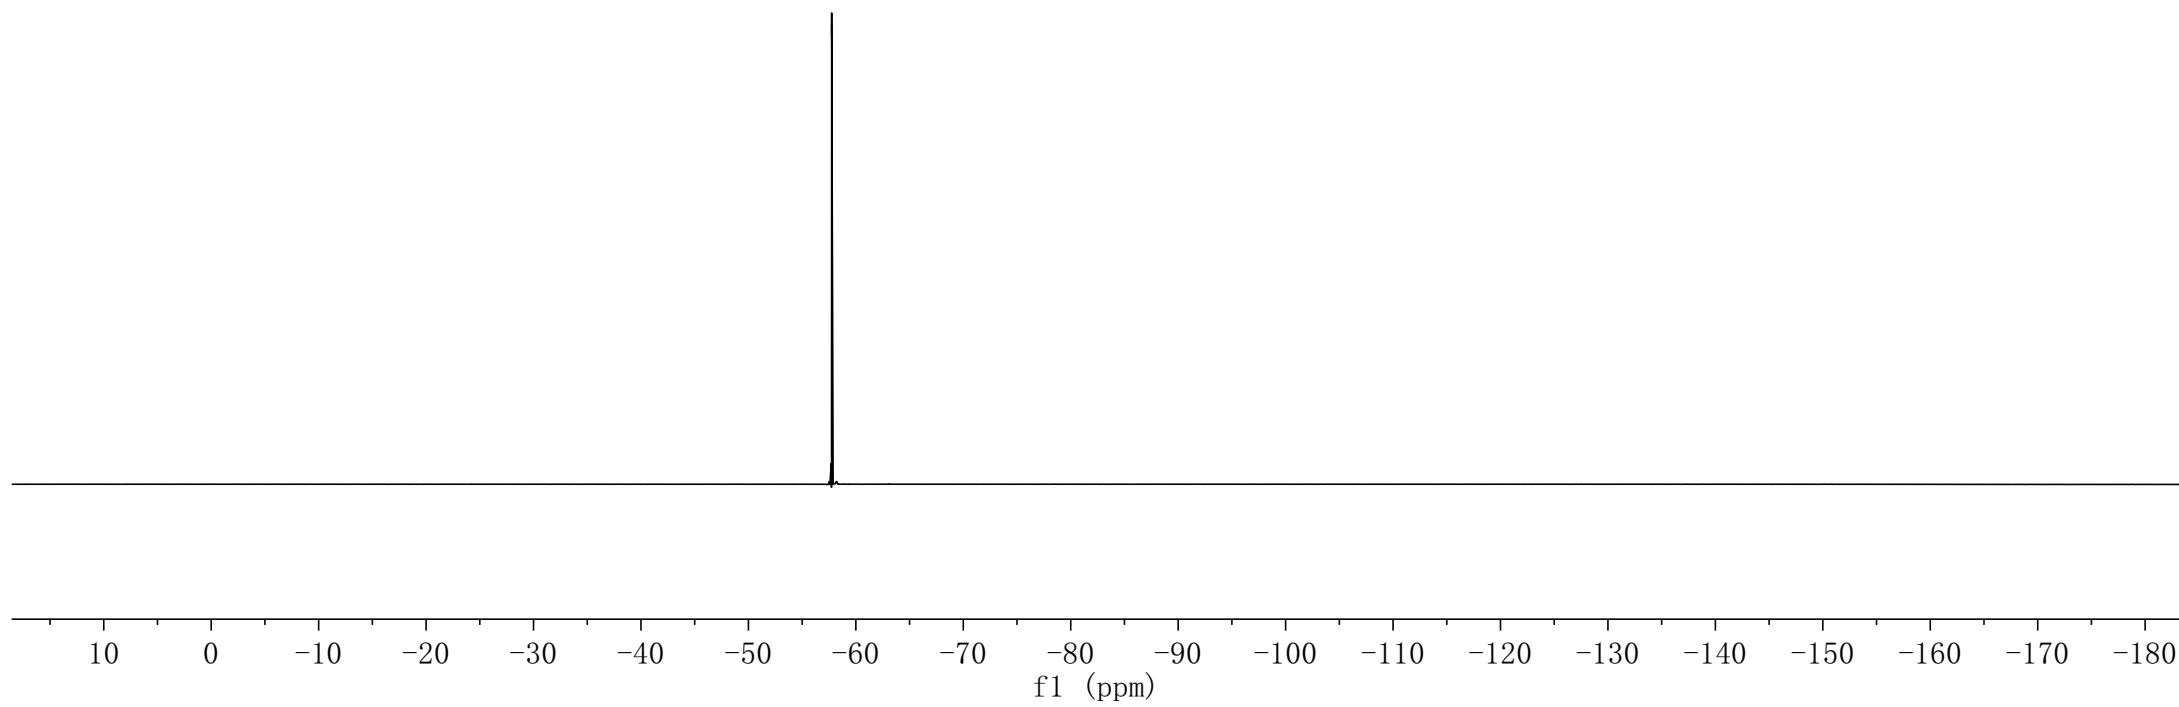

7.563  
7.559  
7.557  
7.553  
7.547  
7.260  
7.063  
7.053  
7.051  
7.041  
5.767  
5.764  
5.762  
5.758  
5.756  
5.547  
5.545  
5.542  
4.912  
4.838

-4.028  
-3.809

-1.638

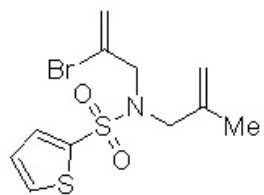

1i <sup>1</sup>H NMR (400 MHz, CDCl<sub>3</sub>)

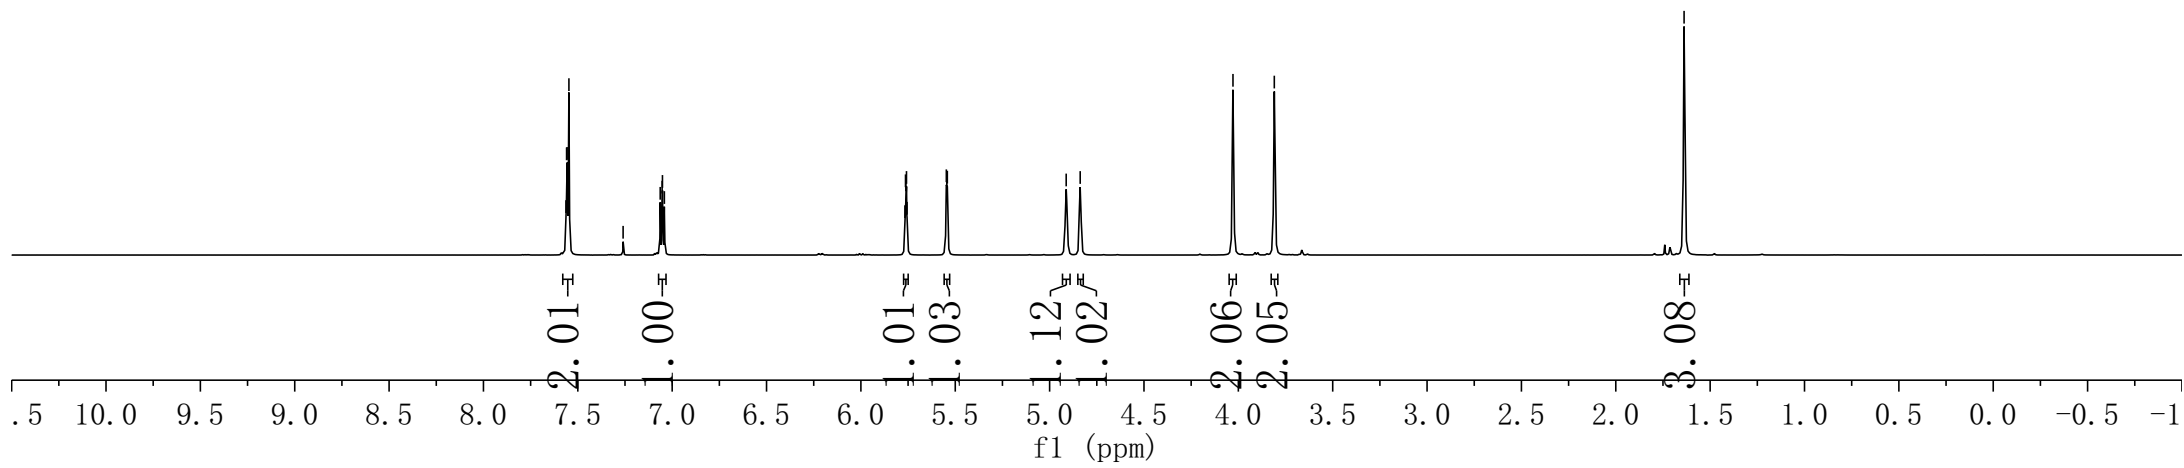

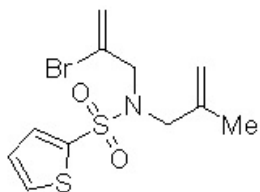

**1i**  $^{13}\text{C}$  NMR (100 MHz,  $\text{CDCl}_3$ )

140.456  
139.033  
132.021  
131.633  
127.164  
127.084  
119.709  
115.415

77.319  
77.000  
76.681

54.176  
53.718

19.675

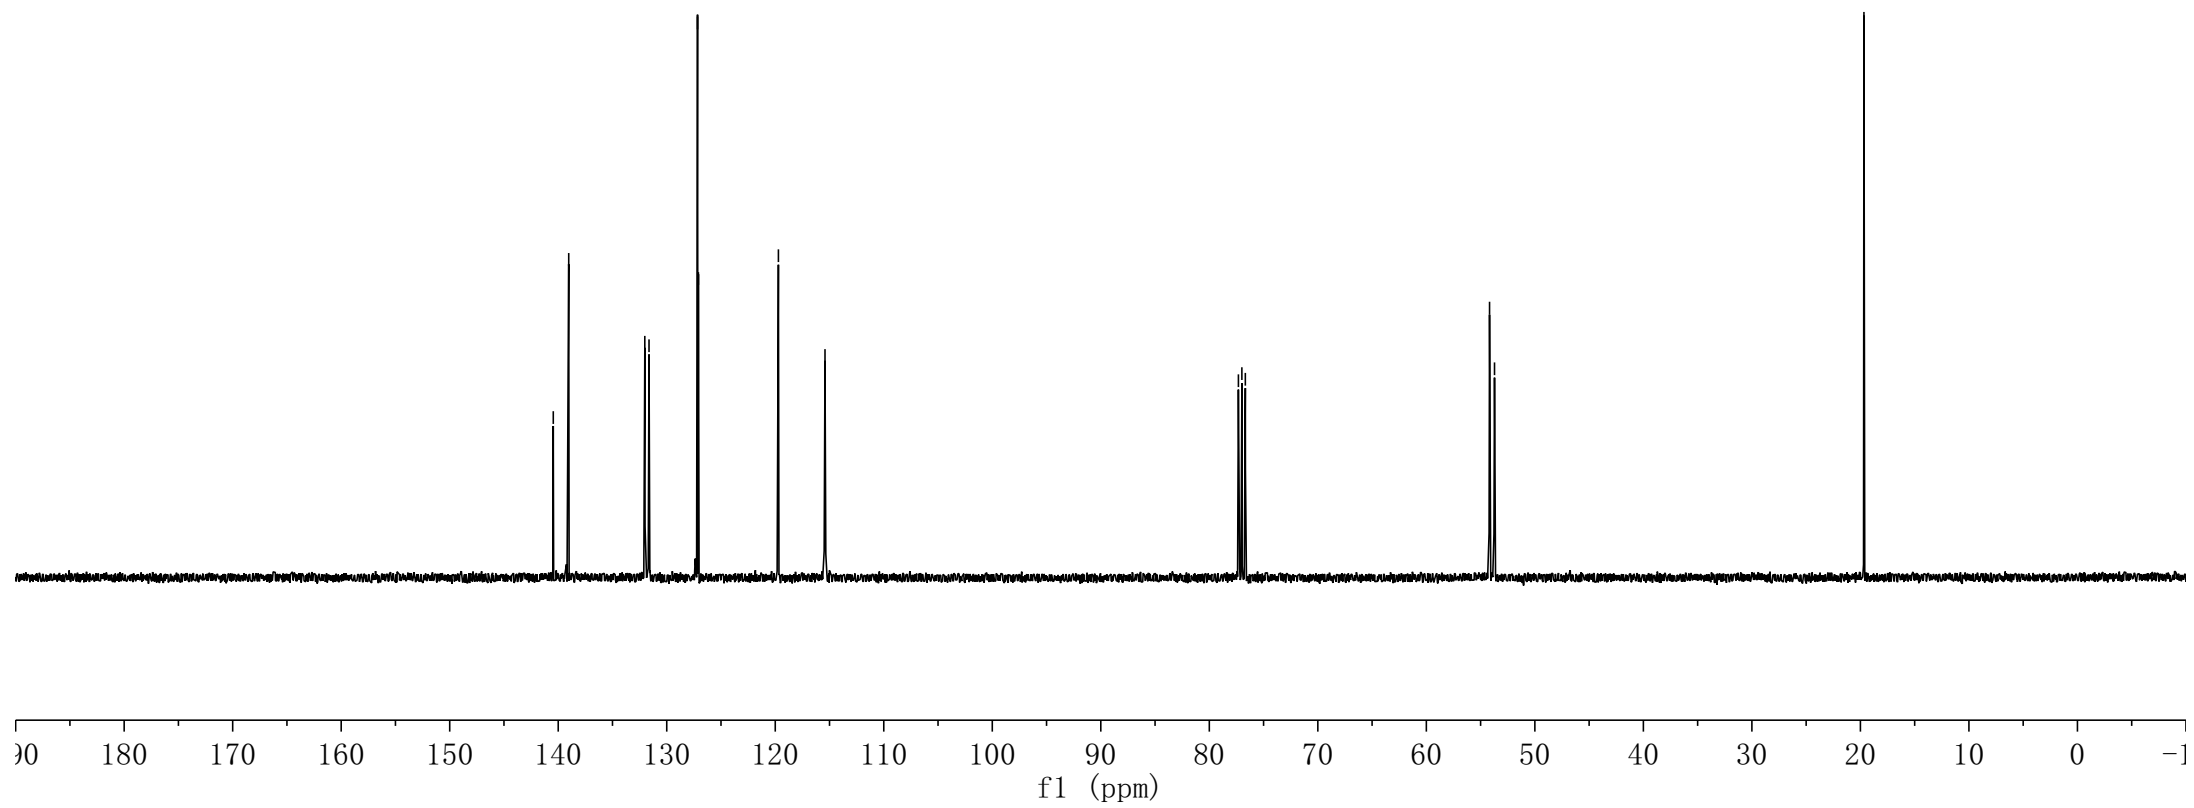

7.672  
7.667  
7.659  
7.651  
7.647  
7.639  
7.335  
7.330  
7.321  
7.310  
7.305  
7.298  
7.284  
7.271  
7.268  
7.257  
7.251  
7.245  
5.634  
5.459  
5.442  
5.431  
5.188  
-4.317  
-3.989  
-2.426  
-0.000

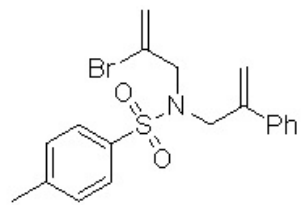

11 <sup>1</sup>H NMR (400 MHz, CDCl<sub>3</sub>)

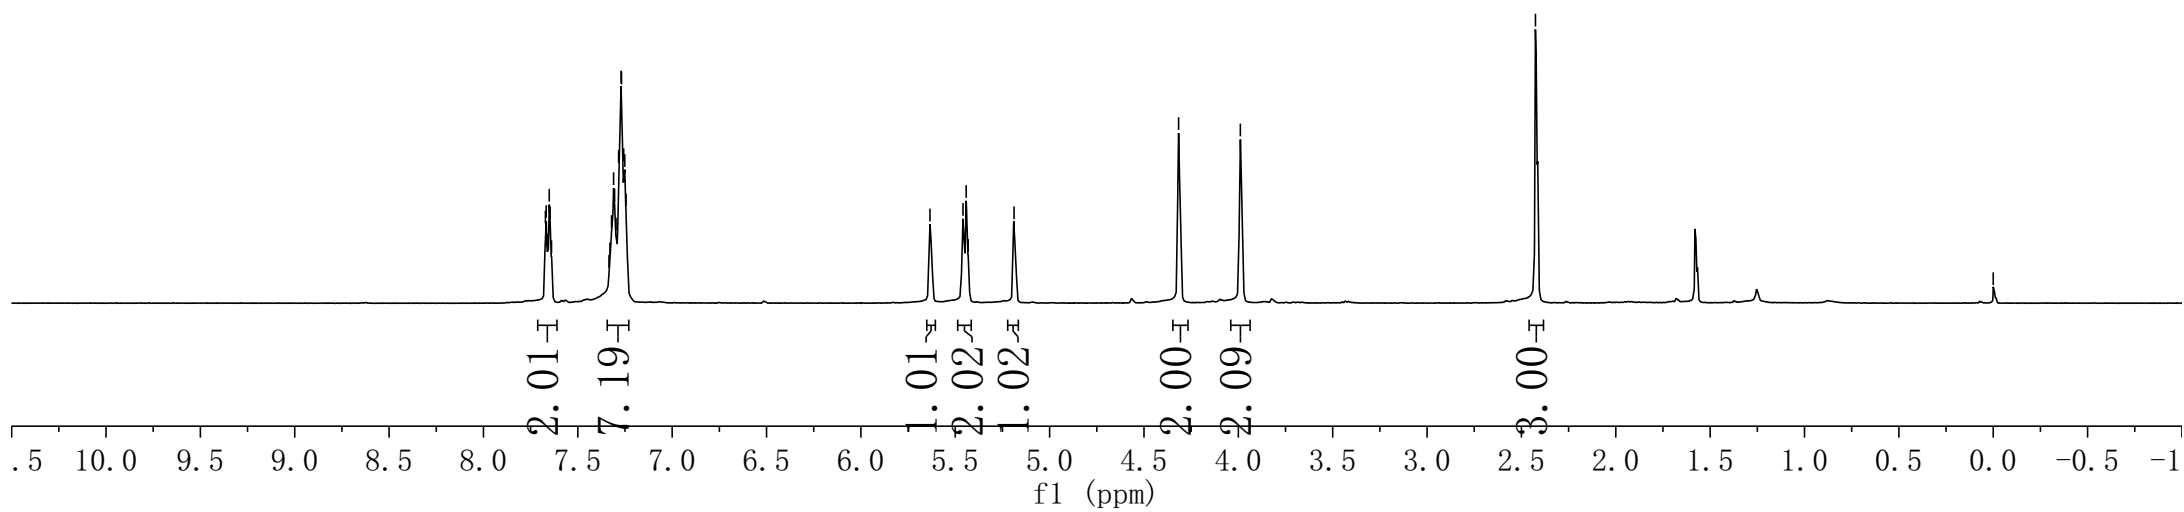

143.421  
141.941  
138.195  
136.515  
129.506  
128.282  
127.934  
127.297  
127.164  
126.264  
119.201  
116.897

77.318  
77.000  
76.682

54.063  
51.380

21.445

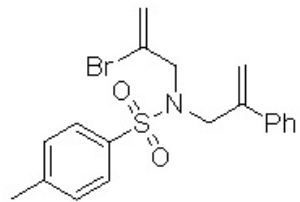

**11**  $^{13}\text{C}$  NMR (100 MHz,  $\text{CDCl}_3$ )

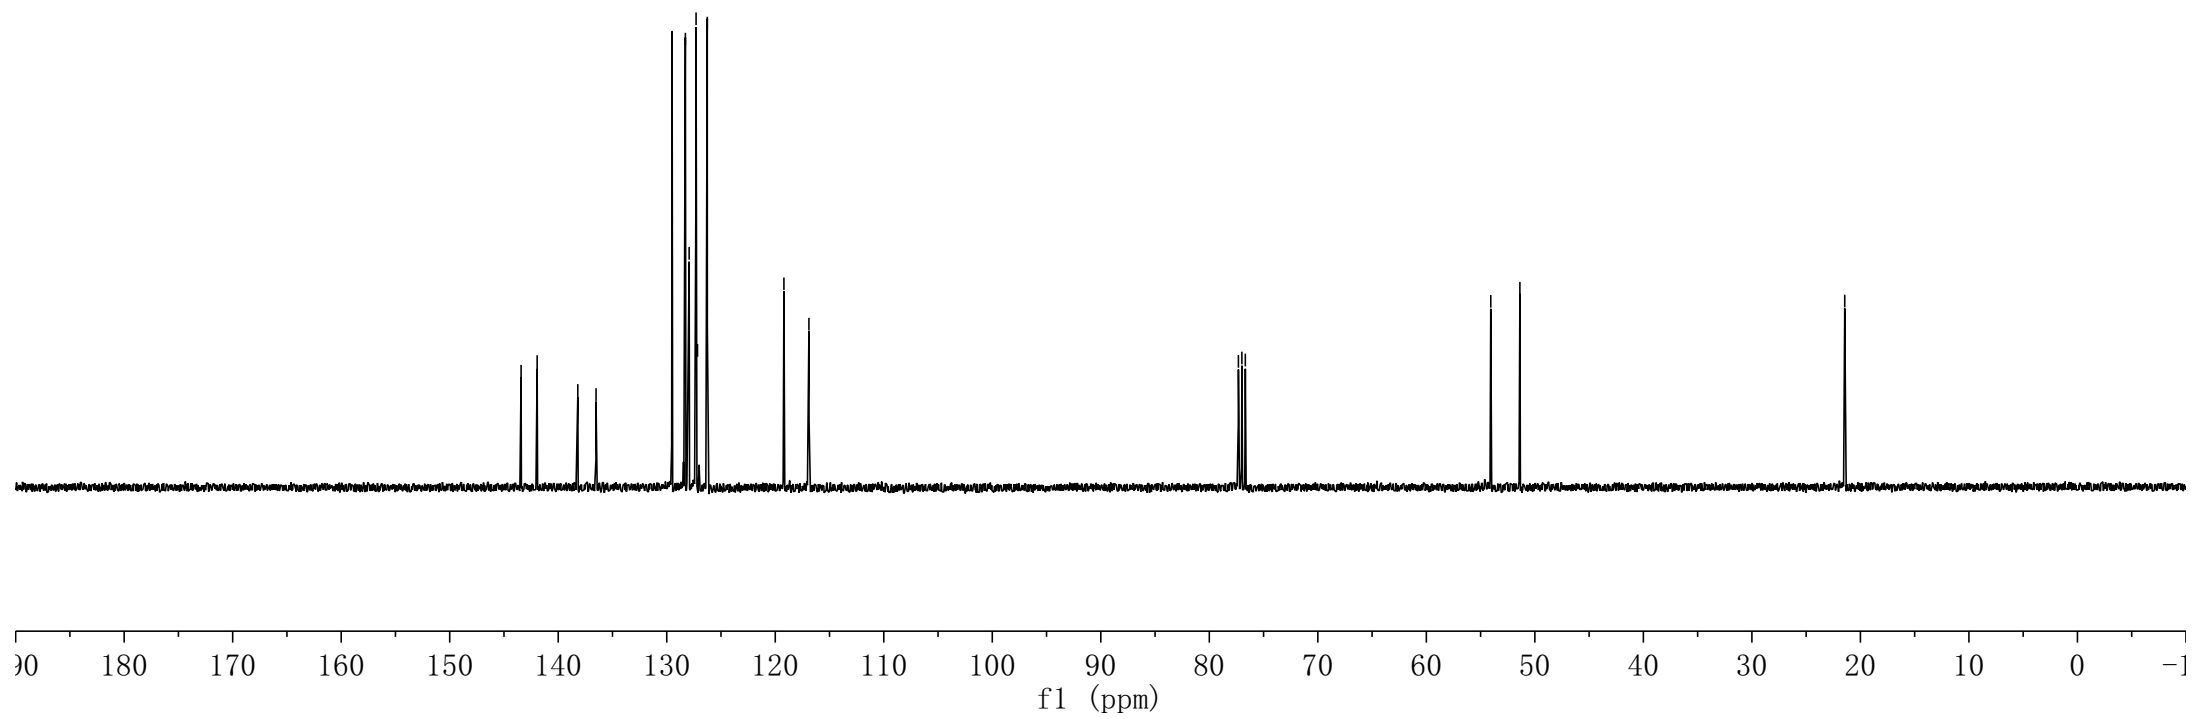

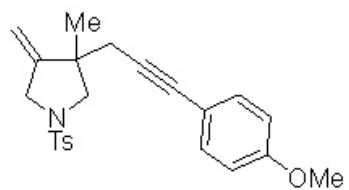

**3a**  $^1\text{H}$  NMR (400 MHz,  $\text{CDCl}_3$ )

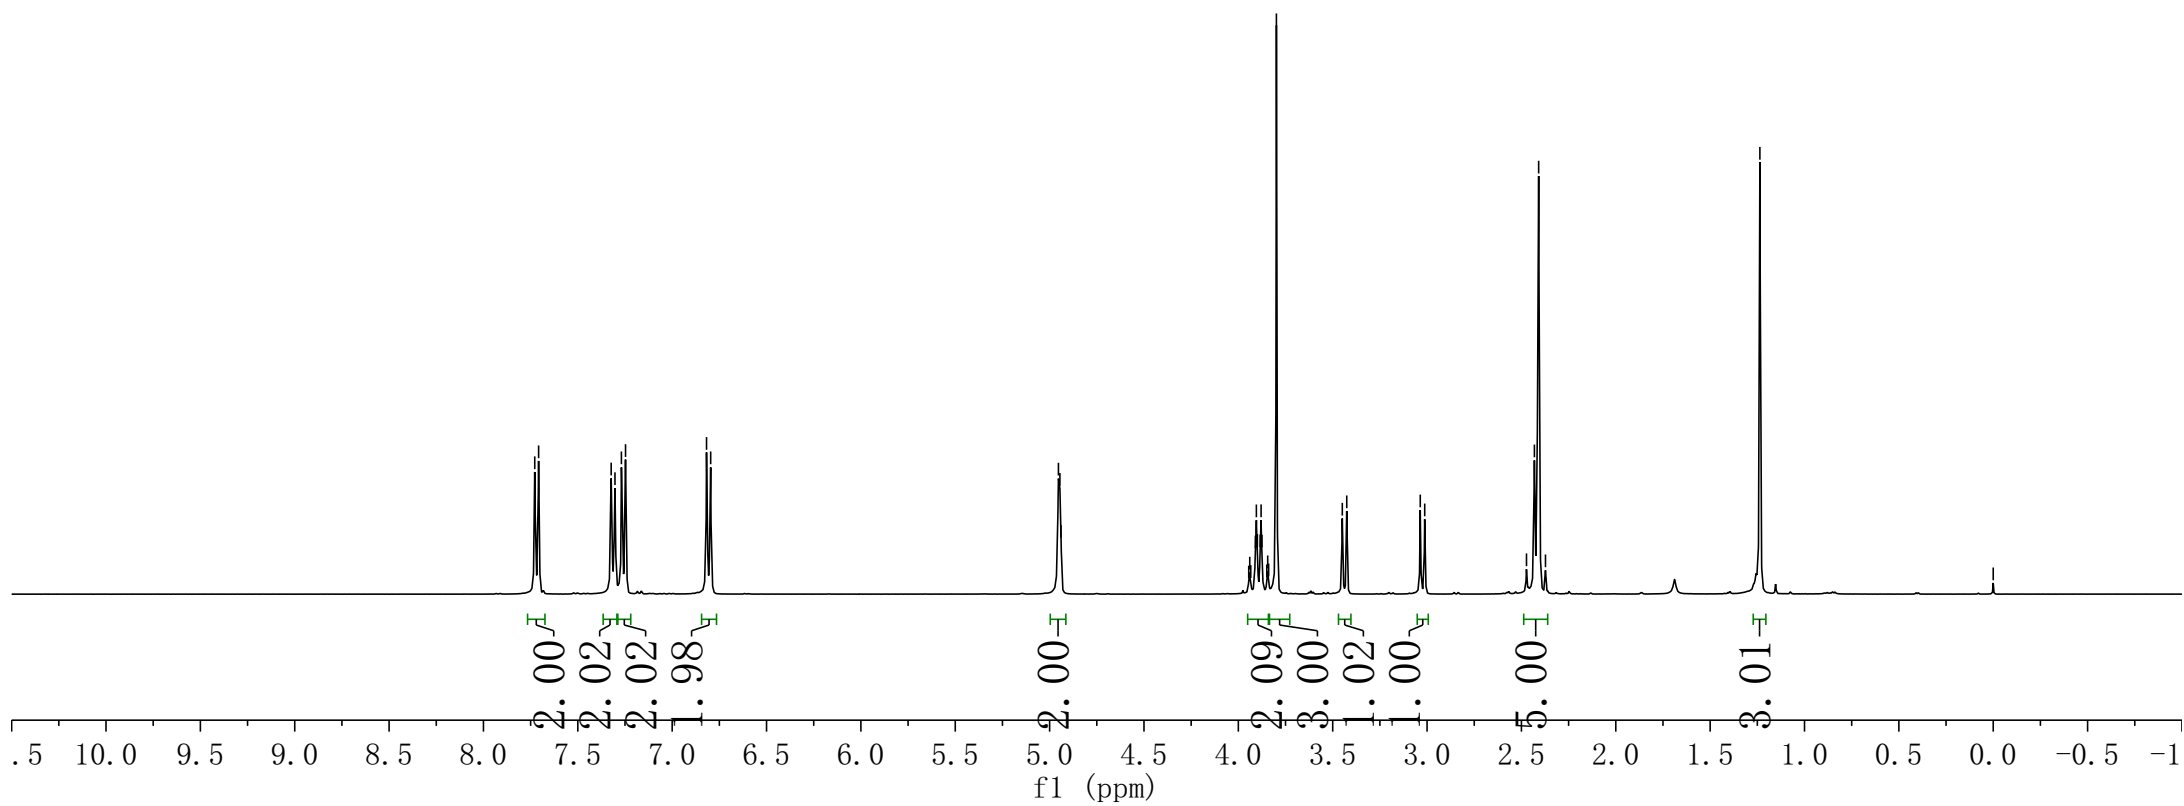

7.728  
7.708  
7.323  
7.303  
7.269  
7.247  
6.818  
6.796  
4.953  
4.946  
4.940  
3.945  
3.940  
3.934  
3.910  
3.904  
3.899  
3.884  
3.879  
3.875  
3.849  
3.844  
3.839  
3.798  
3.449  
3.426  
3.036  
3.012  
2.473  
2.431  
2.409  
2.373  
1.236  
--0.000

-159.179  
 -150.694  
 -143.606  
 132.851  
 132.441  
 129.618  
 127.806  
 -115.449  
 113.763  
 -106.404  
 84.744  
 82.320  
 77.318  
 77.000  
 76.682  
 -58.698  
 -55.229  
 -52.249  
 -45.304  
 -30.013  
 23.437  
 -21.516

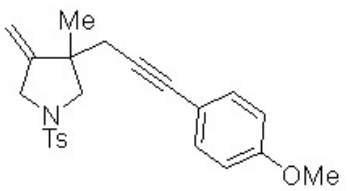

**3a** <sup>13</sup>C NMR (100 MHz, CDCl<sub>3</sub>)

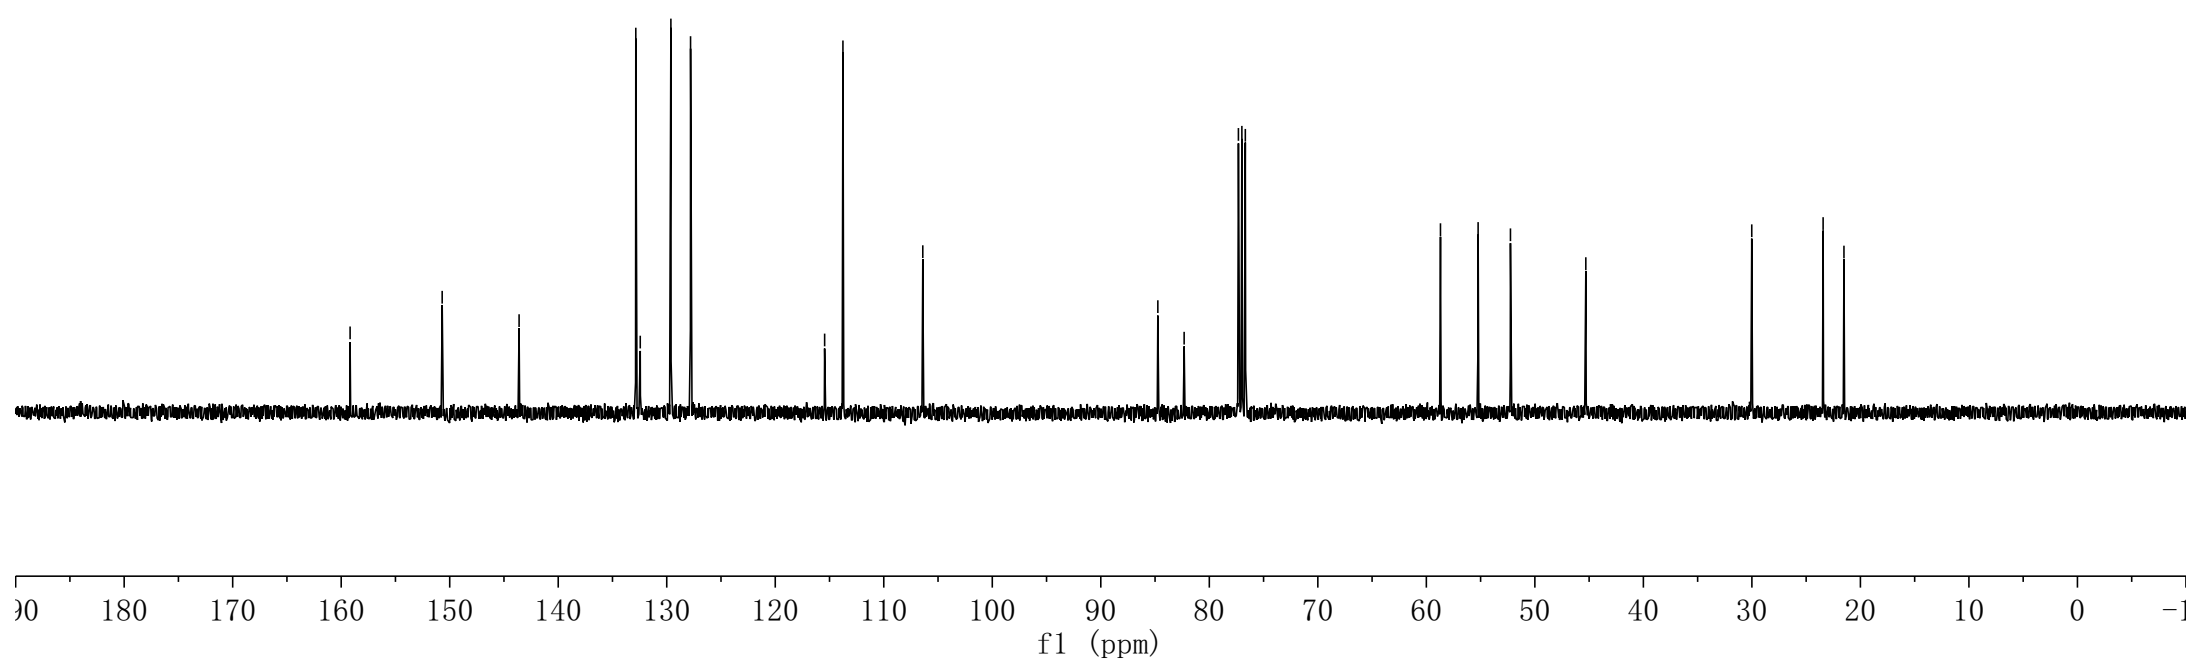

7.726  
7.706  
7.313  
7.306  
7.292  
7.276  
7.270  
7.259  
7.257

4.957  
4.951  
3.942  
3.907  
3.882  
3.846  
3.451  
3.428  
3.041  
3.017  
2.494  
2.452  
2.434  
2.391

-1.241

-0.000

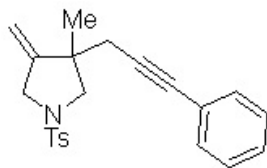

3b <sup>1</sup>H NMR (400 MHz, CDCl<sub>3</sub>)

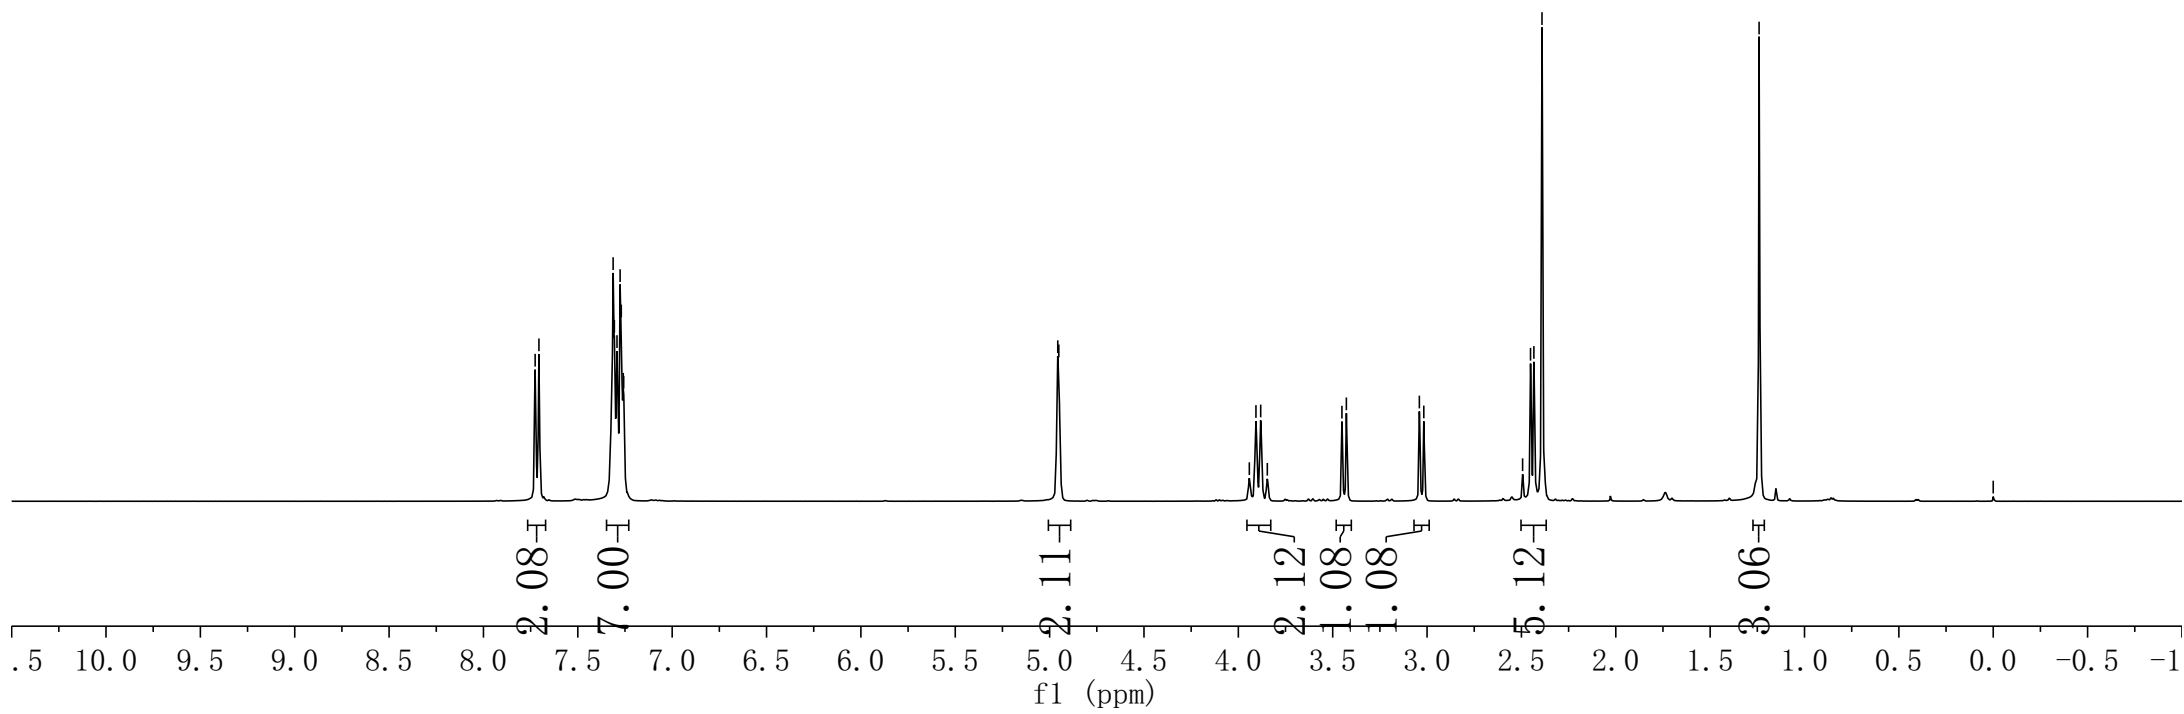



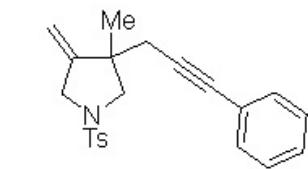

3b  $^{13}\text{C}$  NMR (100 MHz,  $\text{CDCl}_3$ )

150.527  
143.586  
132.395  
131.425  
129.568  
128.091  
127.735  
123.265

106.434

86.333  
82.532  
77.318  
77.000  
76.681

58.636  
52.190  
45.202

29.907  
23.401  
21.439

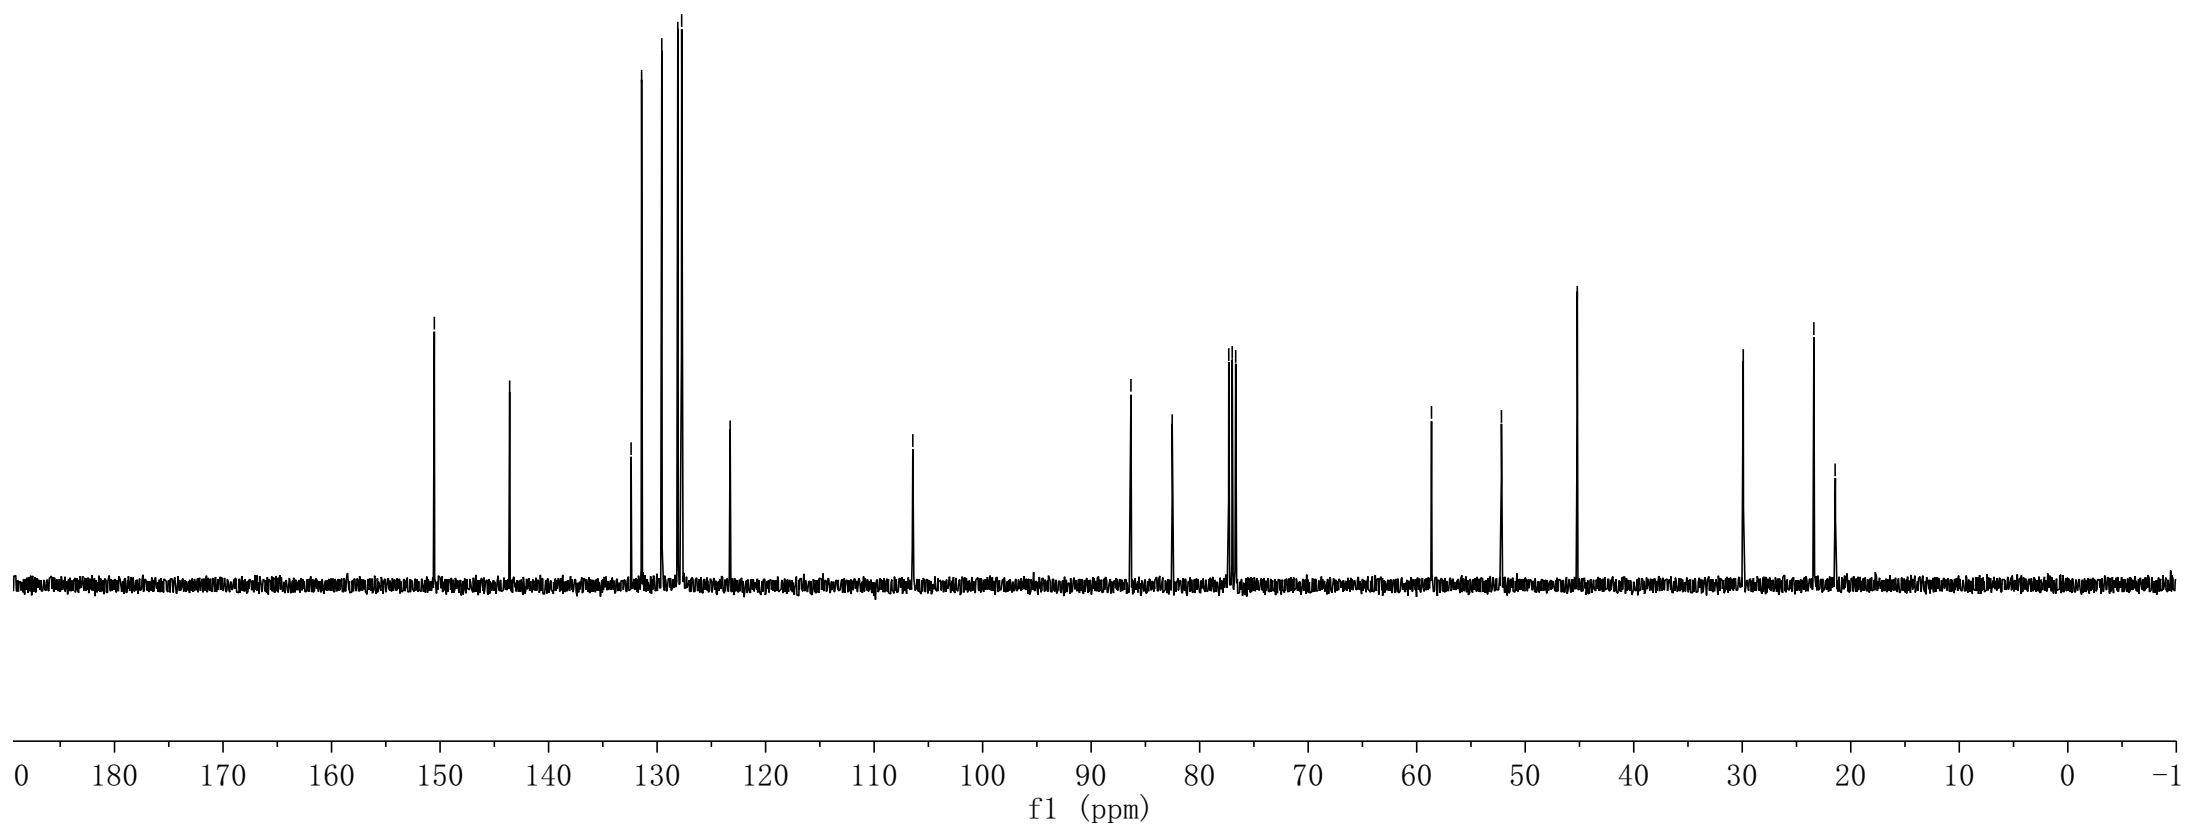

7.731  
7.710  
7.325  
7.305  
7.260  
7.251  
7.231  
7.121  
7.100

4.956  
4.950  
4.944

3.910  
3.904  
3.899  
3.893  
3.888  
3.883  
3.444  
3.420  
3.045  
3.022  
2.663  
2.644  
2.625  
2.606  
2.479  
2.437  
2.424  
2.411  
2.383  
1.242  
1.225  
1.205

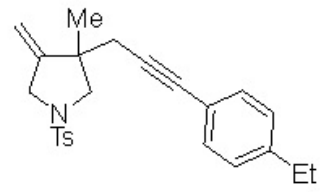

3c <sup>1</sup>H NMR (400 MHz, CDCl<sub>3</sub>)

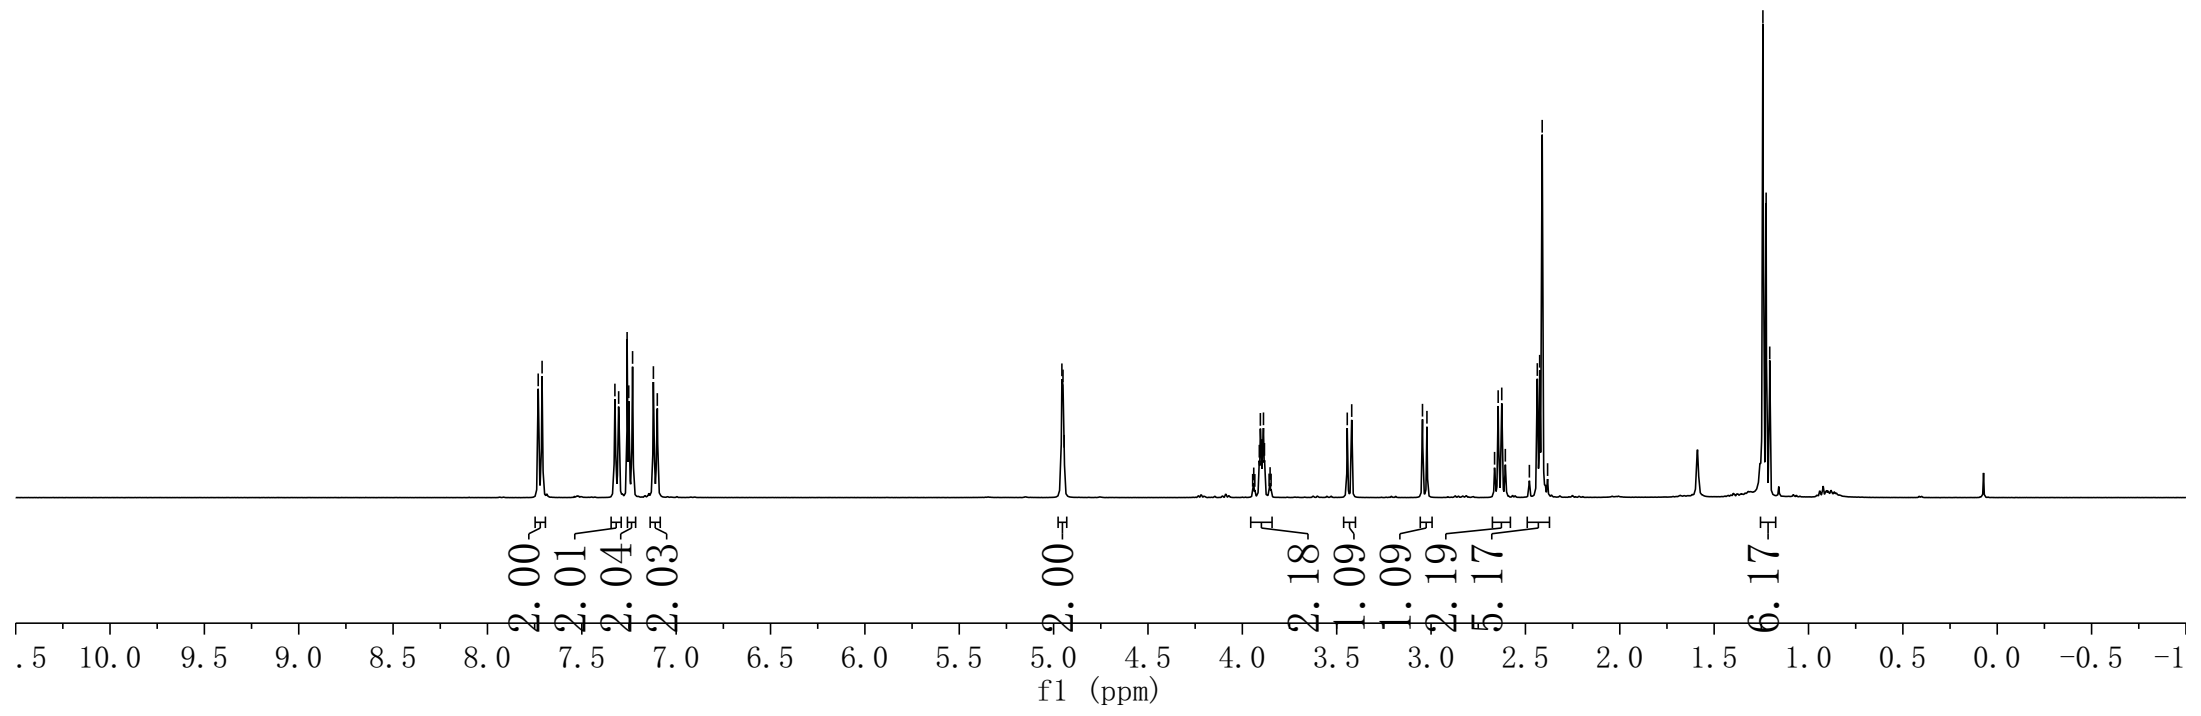

150.638  
144.156  
143.607  
132.422  
131.461  
129.620  
127.802  
127.712  
120.471

-106.437

85.551  
82.637  
77.318  
77.000  
76.681

58.695  
52.250  
45.294

29.987  
28.712  
23.453  
21.508  
15.377

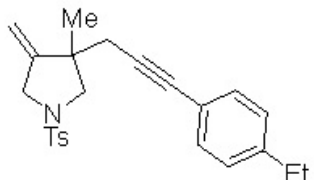

3c <sup>13</sup>C NMR (100 MHz, CDCl<sub>3</sub>)

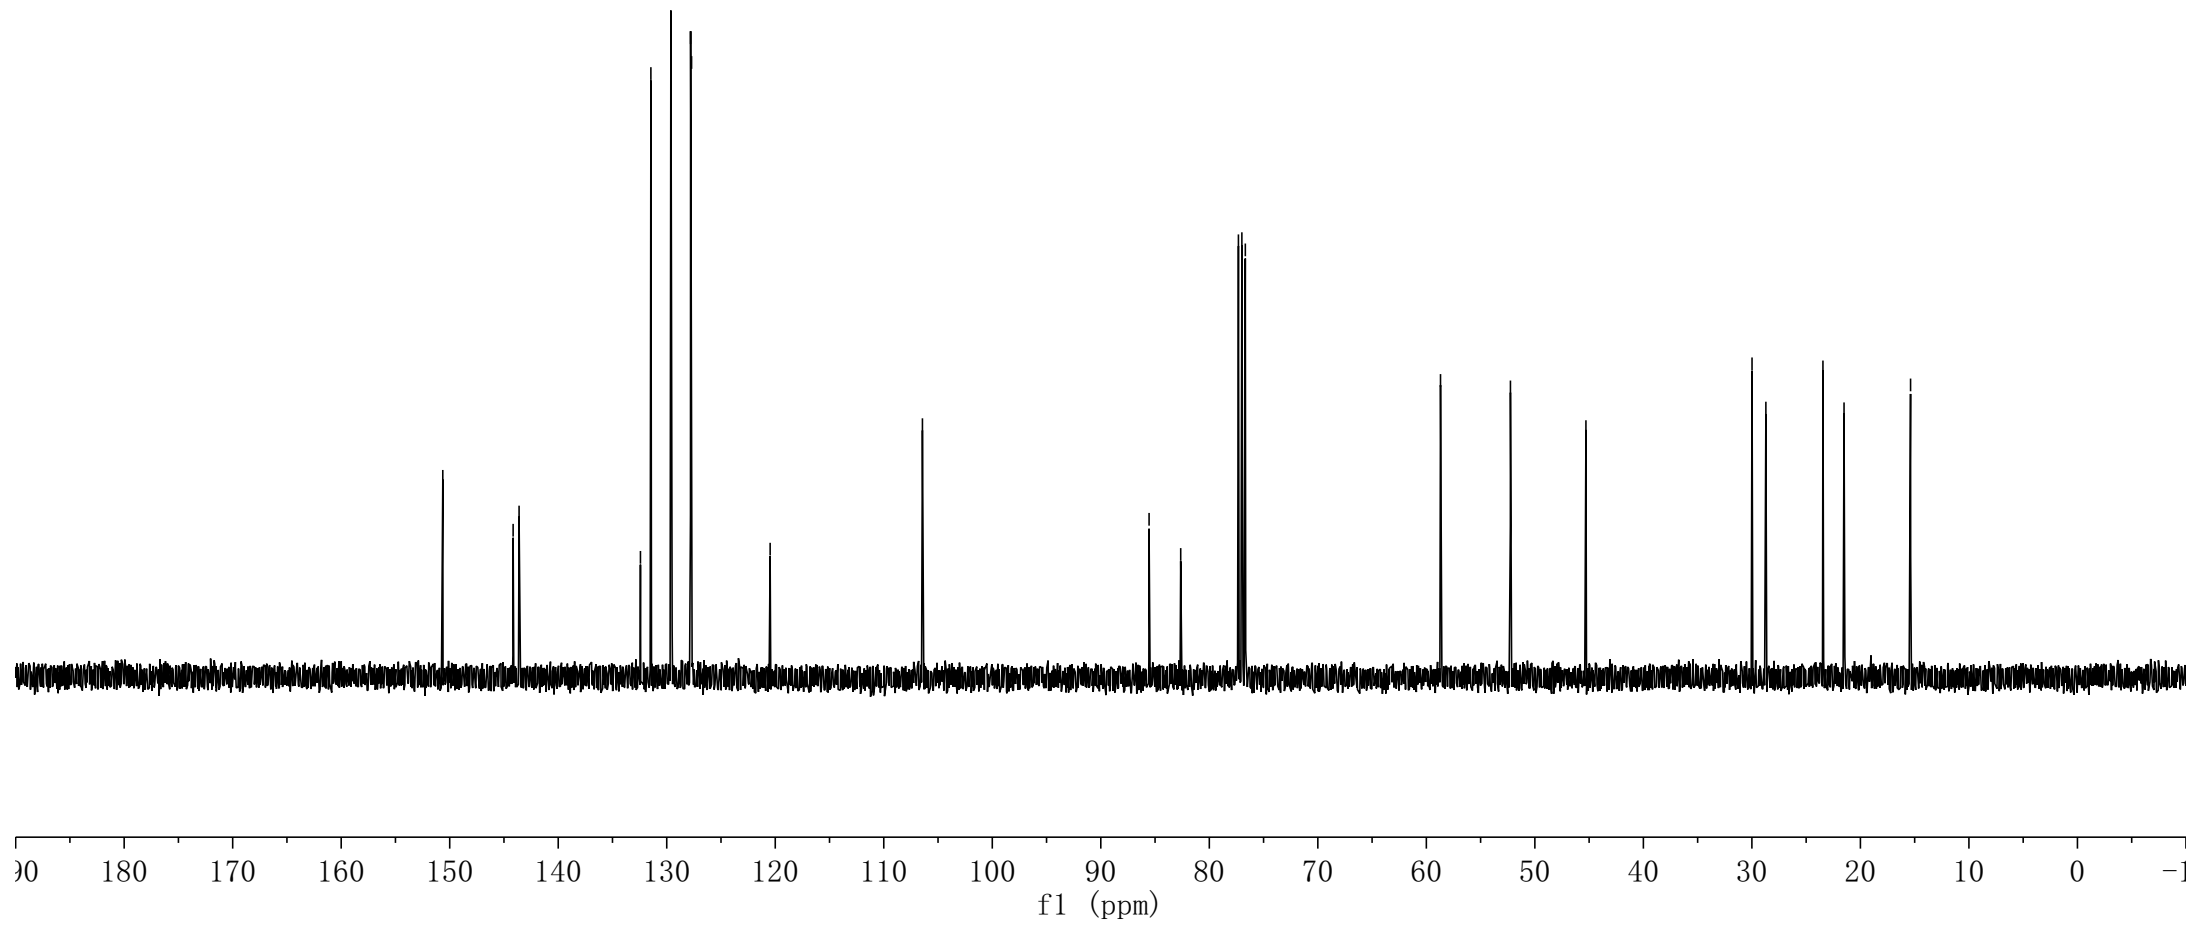

7.730  
7.711  
7.322  
7.302  
7.260  
7.244  
7.226  
7.096  
7.077

4.951  
3.939  
3.904  
3.888  
3.852  
3.445  
3.421  
3.045  
3.021  
2.586  
2.567  
2.548  
2.479  
2.437  
2.423  
2.406  
2.382  
1.670  
1.651  
1.634  
1.615  
1.597  
1.578  
1.241  
0.949  
0.931  
0.912

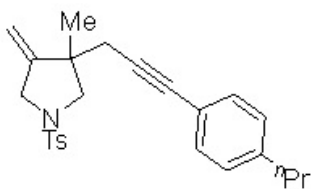

3d <sup>1</sup>H NMR (400 MHz, CDCl<sub>3</sub>)

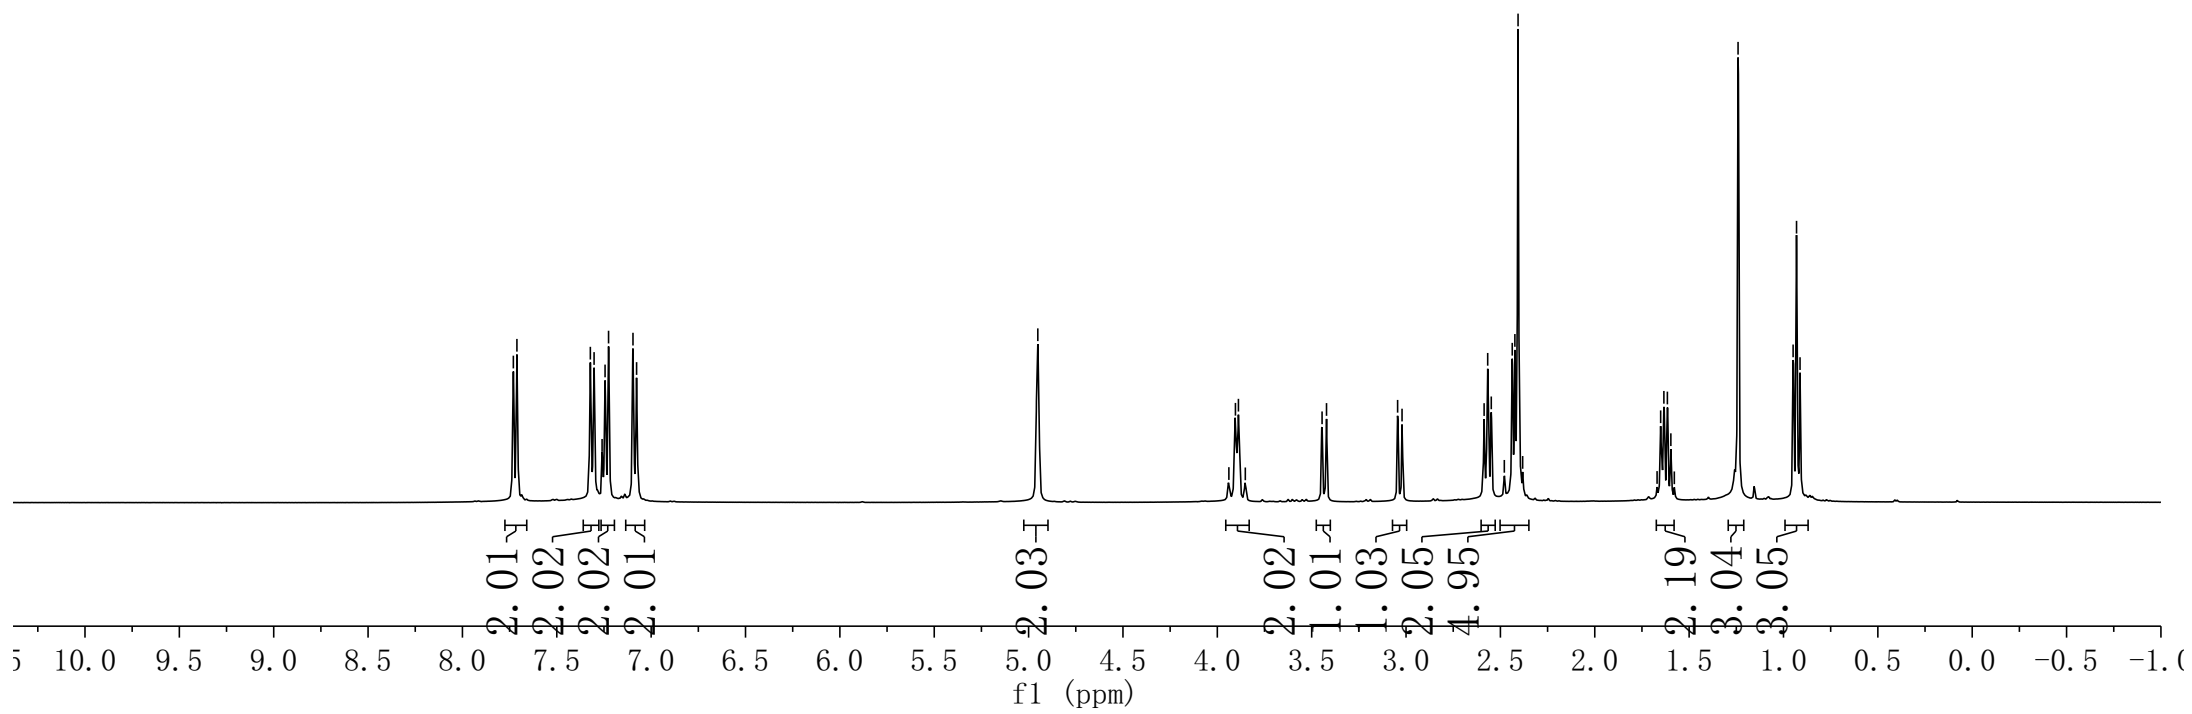

150.596  
143.607  
142.588  
132.375  
131.346  
129.608  
128.295  
127.776  
120.455

106.428

85.549  
82.634  
77.319  
77.000  
76.682

58.669  
52.228  
45.268  
37.810  
29.957  
24.306  
23.428  
21.483  
13.683

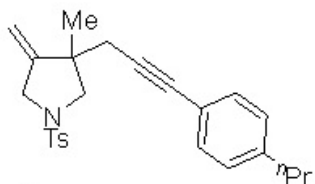

3d <sup>13</sup>C NMR (100 MHz, CDCl<sub>3</sub>)

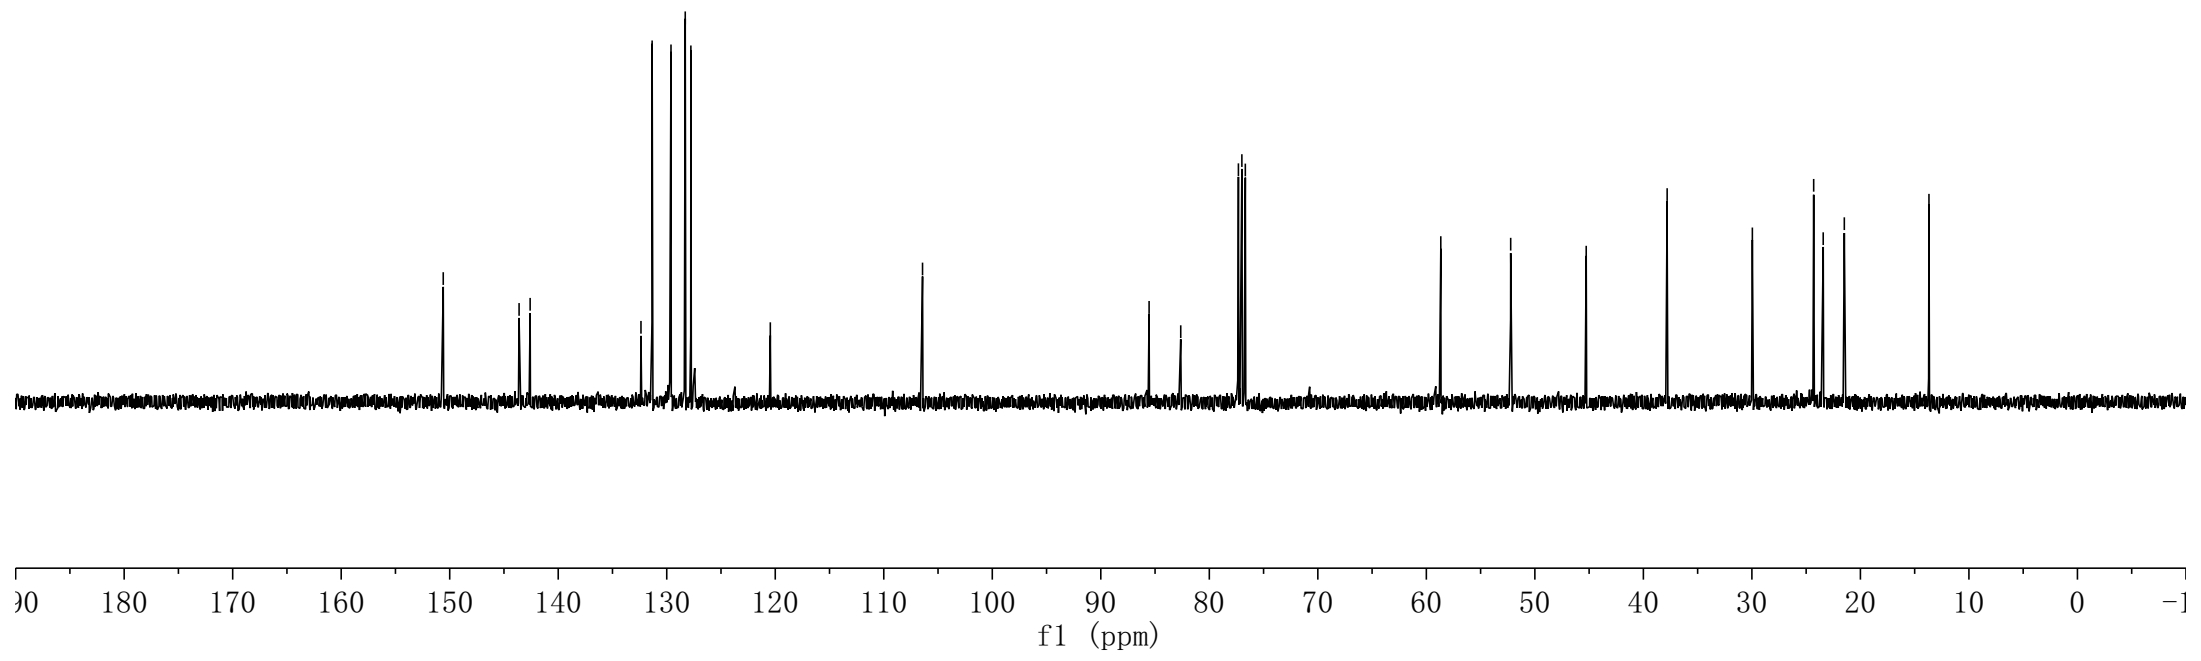

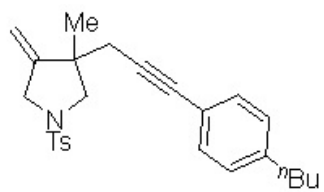

**3e**  $^1\text{H NMR}$  (400 MHz,  $\text{CDCl}_3$ )

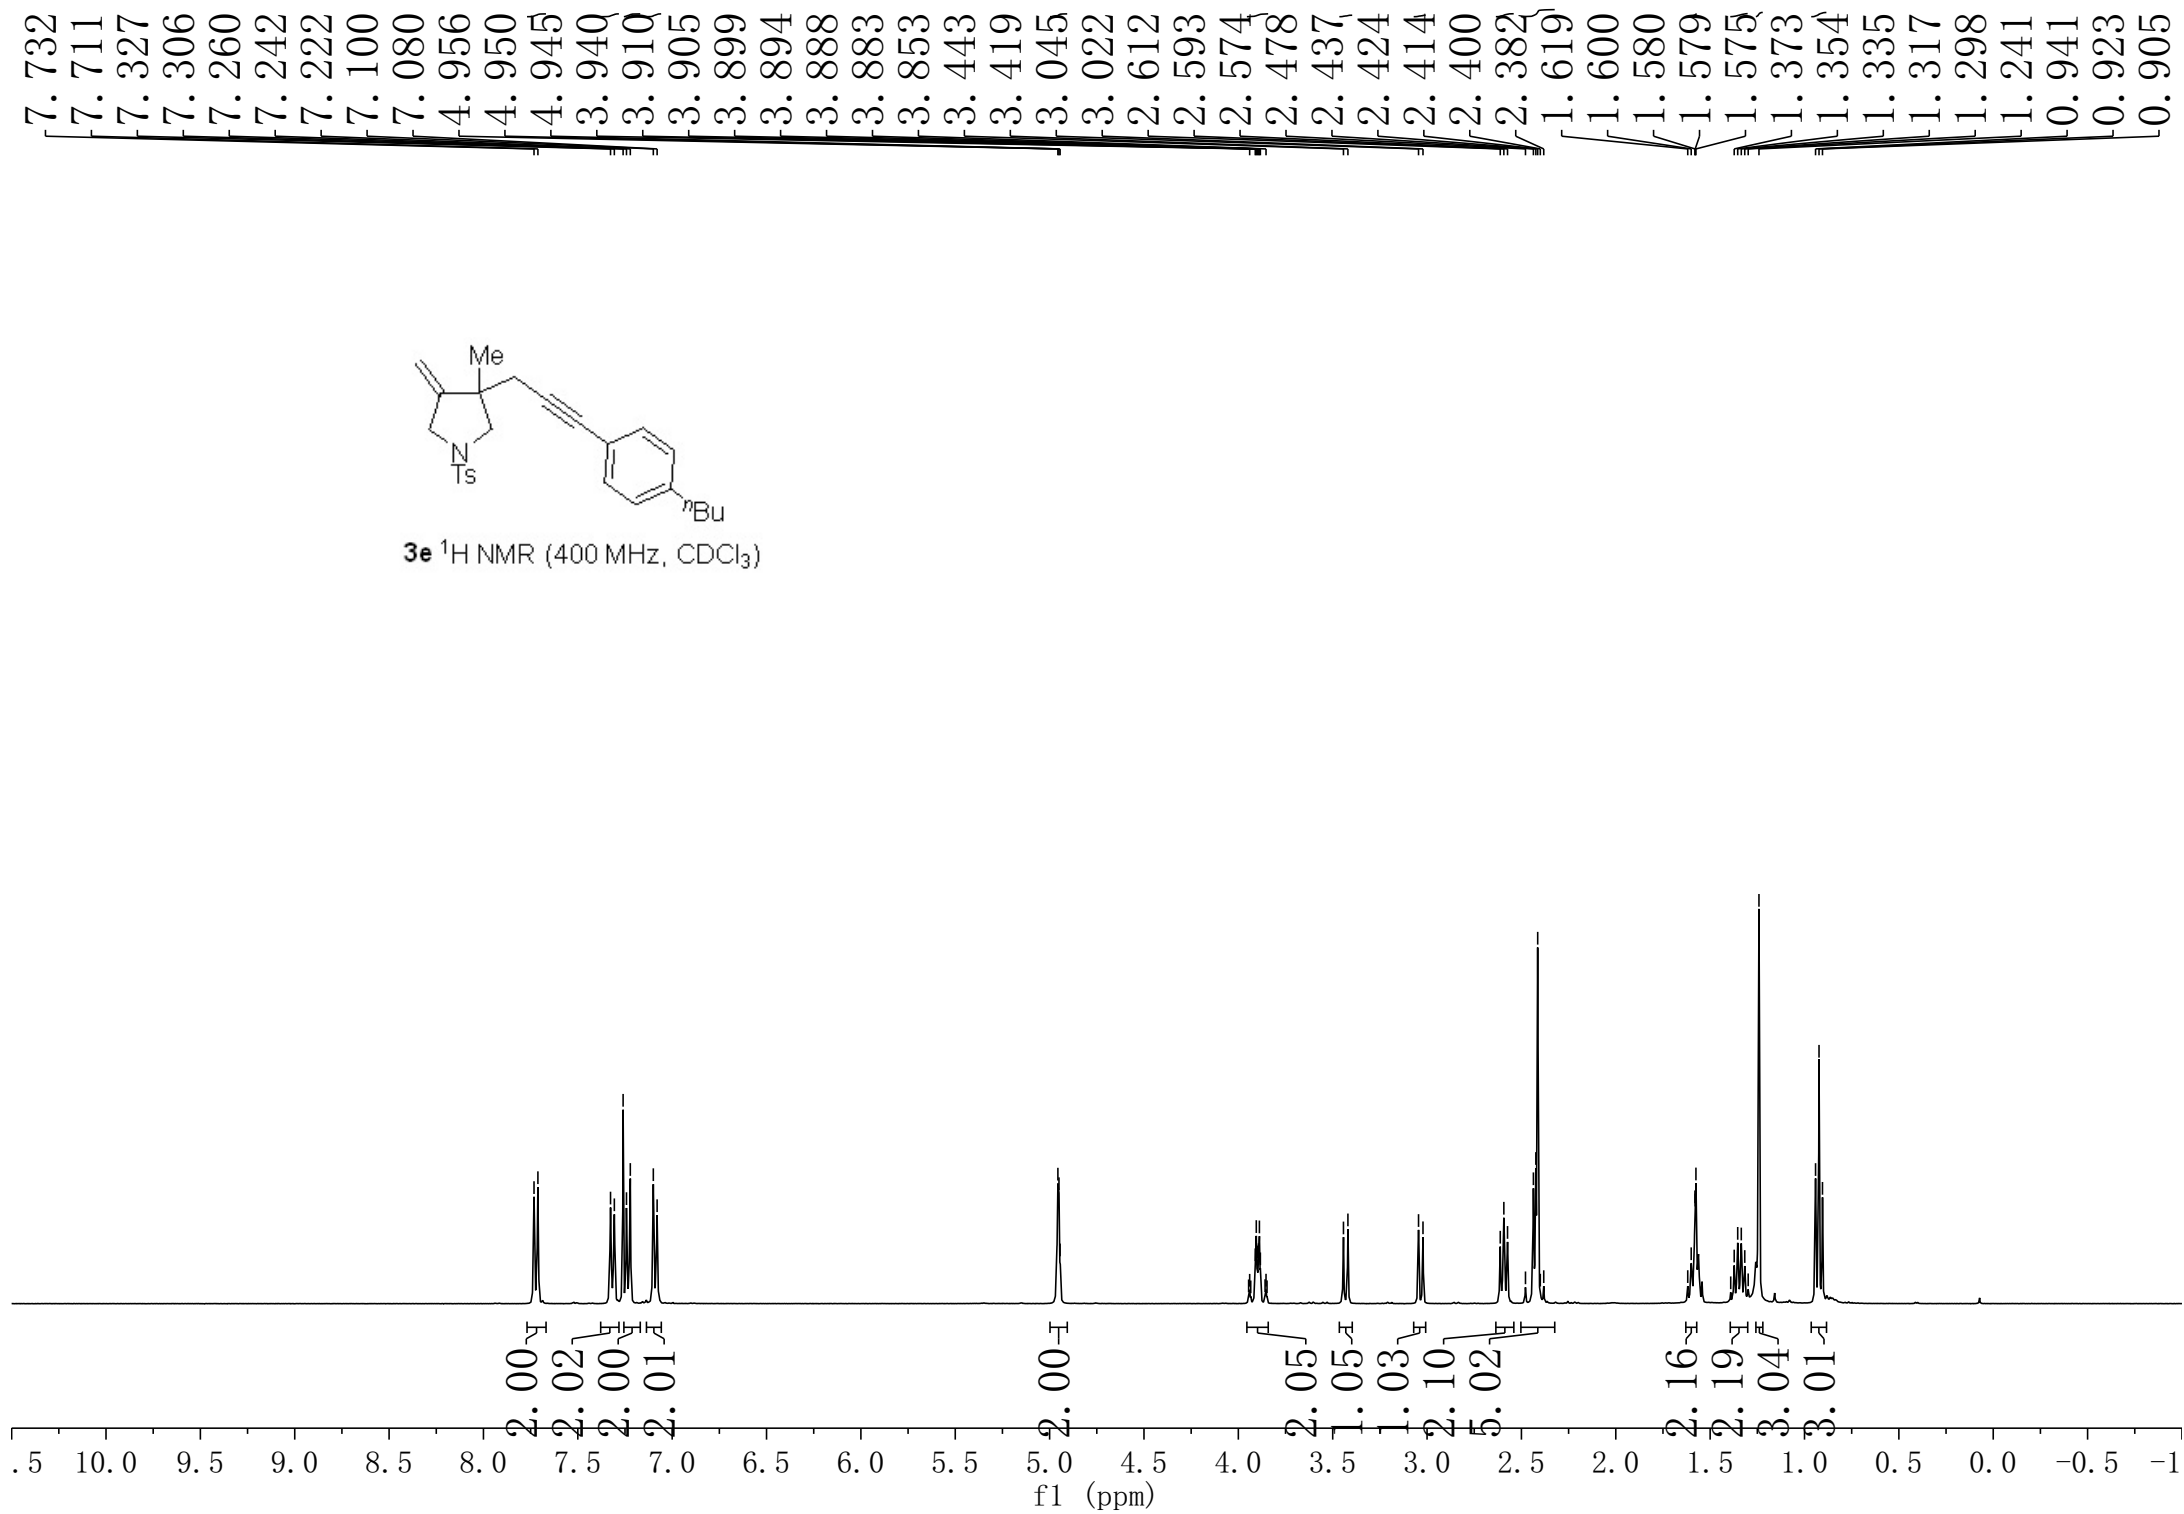

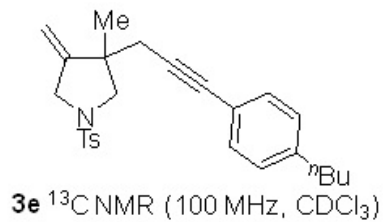

150.671  
 143.611  
 142.861  
 132.471  
 131.394  
 129.632  
 128.279  
 127.820  
 120.442

-106.438

85.555  
 82.669  
 77.318  
 77.000  
 76.682

58.711  
 52.260  
 45.311

35.482  
 33.397  
 30.003  
 23.462  
 22.244  
 21.522  
 13.895

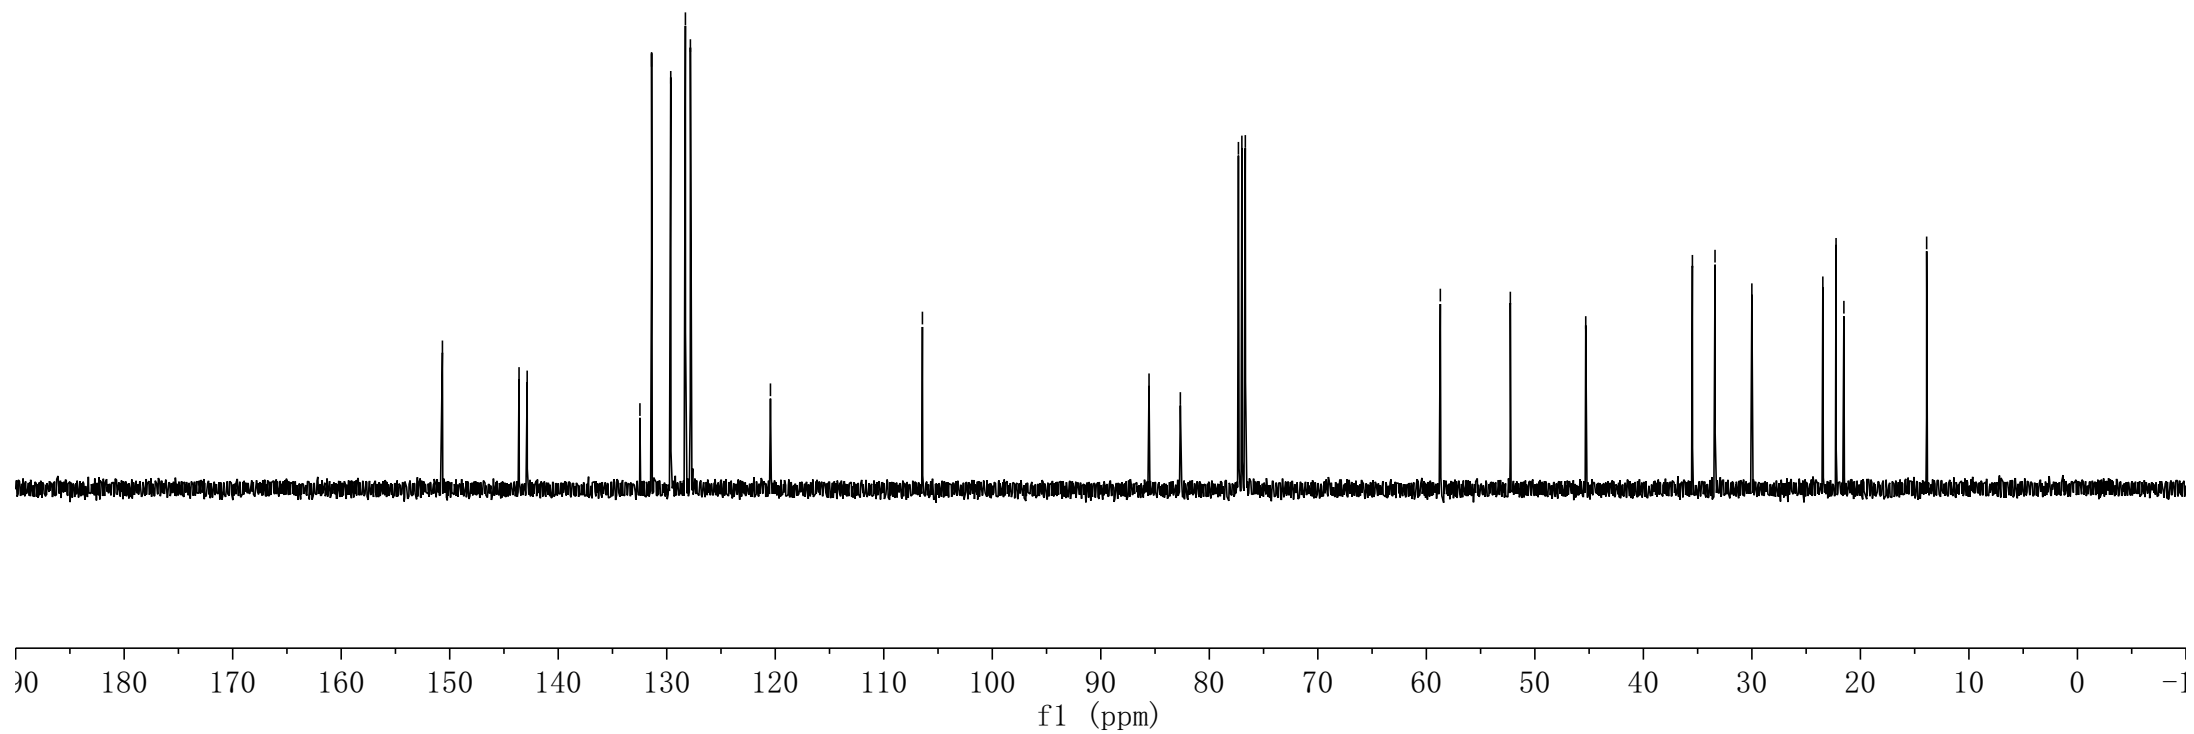

7.758  
7.738  
7.602  
7.583  
7.545  
7.524  
7.473  
7.455  
7.435  
7.421  
7.401  
7.382  
7.364  
7.340  
7.320  
7.260

4.989  
4.984  
4.978  
3.984  
3.979  
3.974  
3.949  
3.944  
3.939  
3.915  
3.911  
3.881  
3.876  
3.871  
3.492  
3.468  
3.074  
3.051  
2.540  
2.498  
2.480  
2.438  
2.414  
1.276

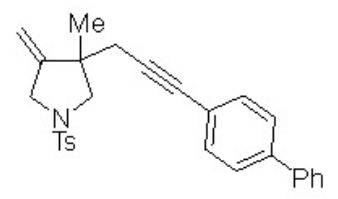

**3f** <sup>1</sup>H NMR (400 MHz, CDCl<sub>3</sub>)

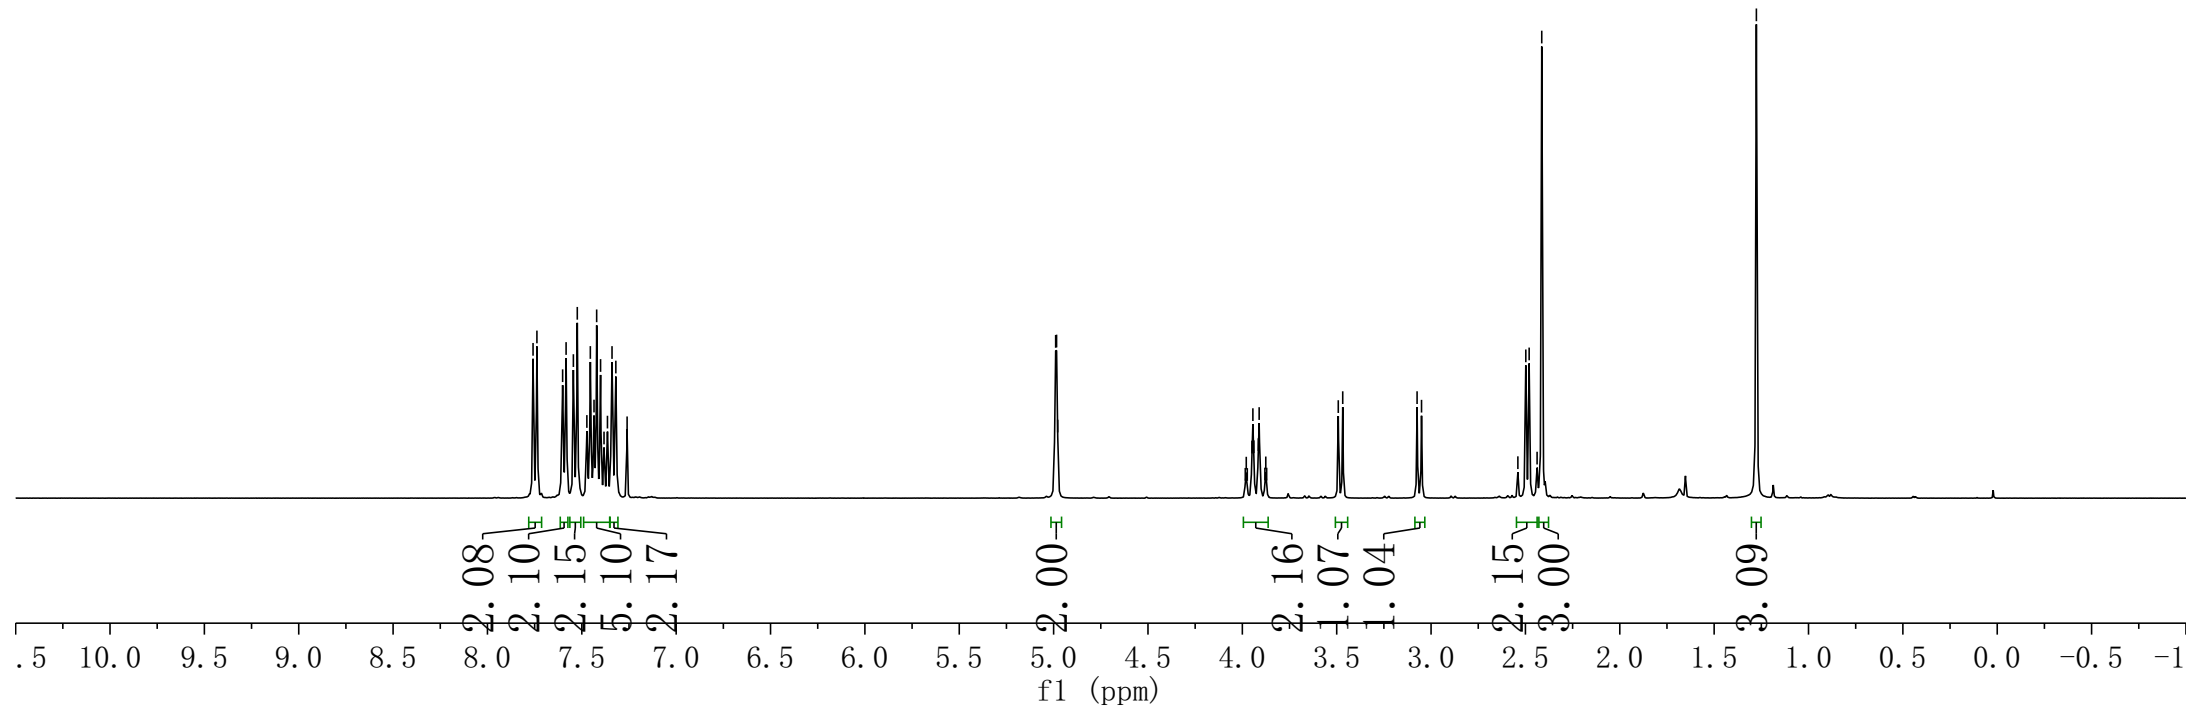



150.622  
143.635  
140.568  
140.310  
132.479  
131.927  
129.635  
128.798  
127.819  
127.523  
126.914  
126.841  
122.252  
-106.511

87.097  
82.451  
77.319  
77.000  
76.682

58.721  
52.256  
45.307

30.089  
23.459  
21.518

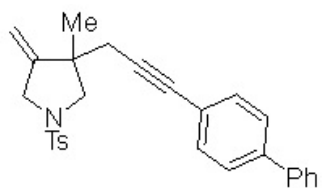

**3f**  $^{13}\text{C}$  NMR (100 MHz,  $\text{CDCl}_3$ )

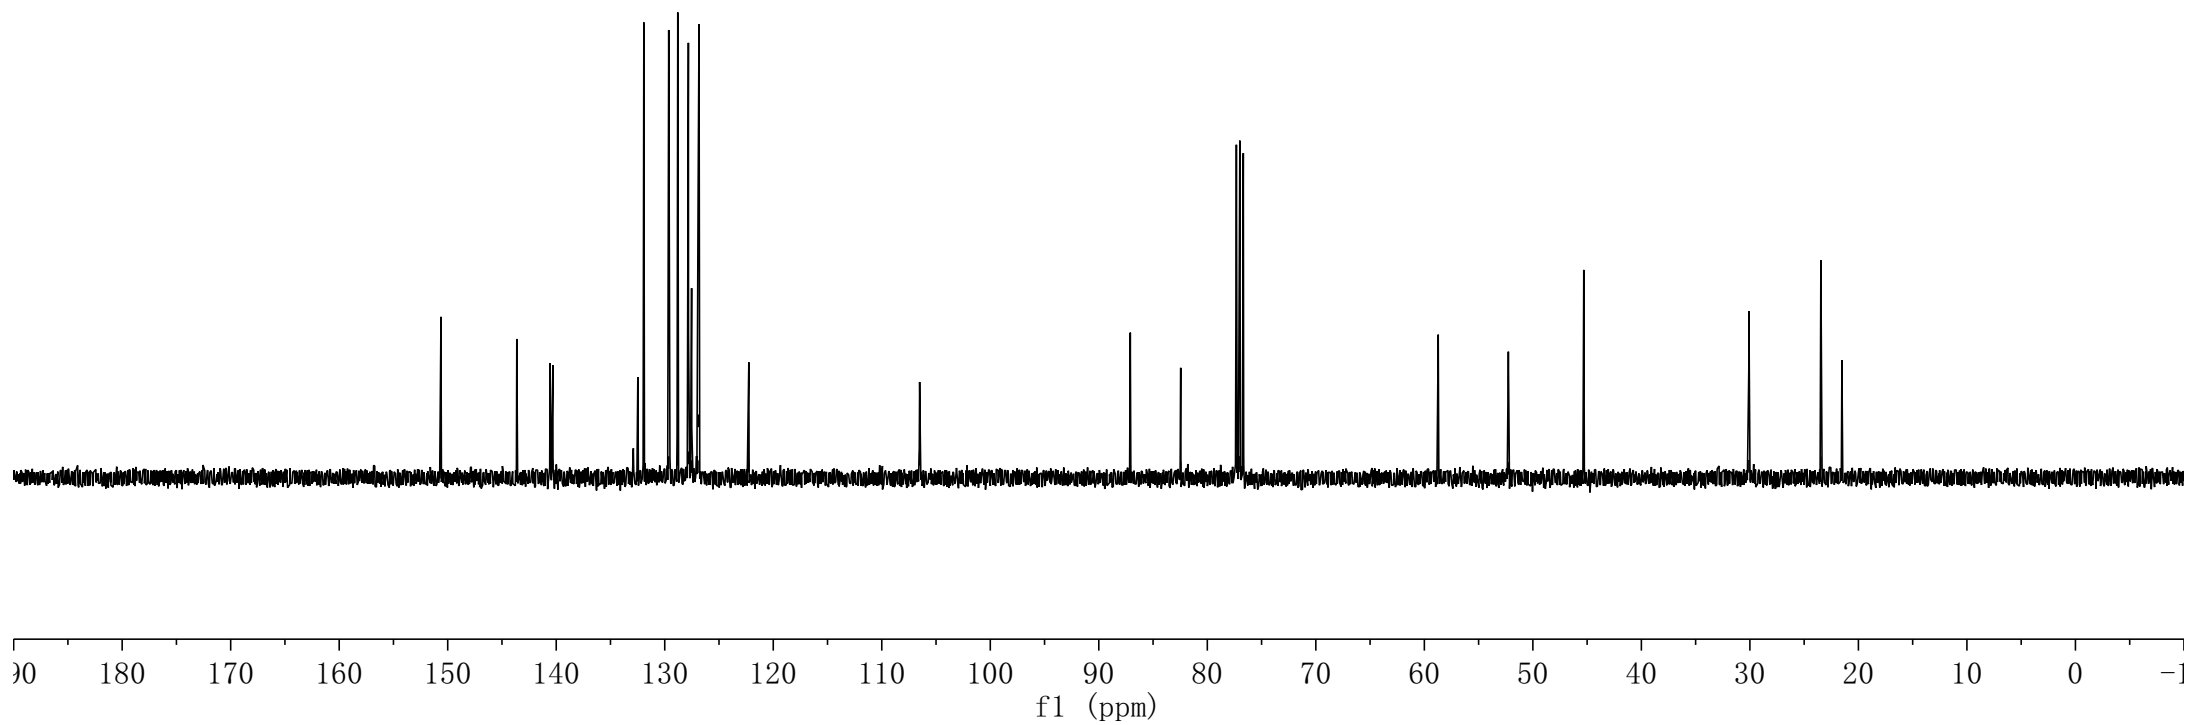

7.725  
7.705  
7.323  
7.315  
7.302  
7.293  
7.285  
7.279  
7.260  
6.988  
6.966  
6.945  
4.965  
4.960  
4.955  
4.951  
4.945  
4.939  
3.957  
3.951  
3.945  
3.922  
3.916  
3.910  
3.871  
3.866  
3.861  
3.836  
3.831  
3.826  
3.448  
3.425  
3.019  
2.996  
2.494  
2.452  
2.428  
2.409  
2.386  
1.234

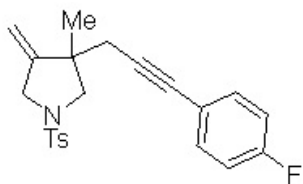

3g <sup>1</sup>H NMR (400 MHz, CDCl<sub>3</sub>)

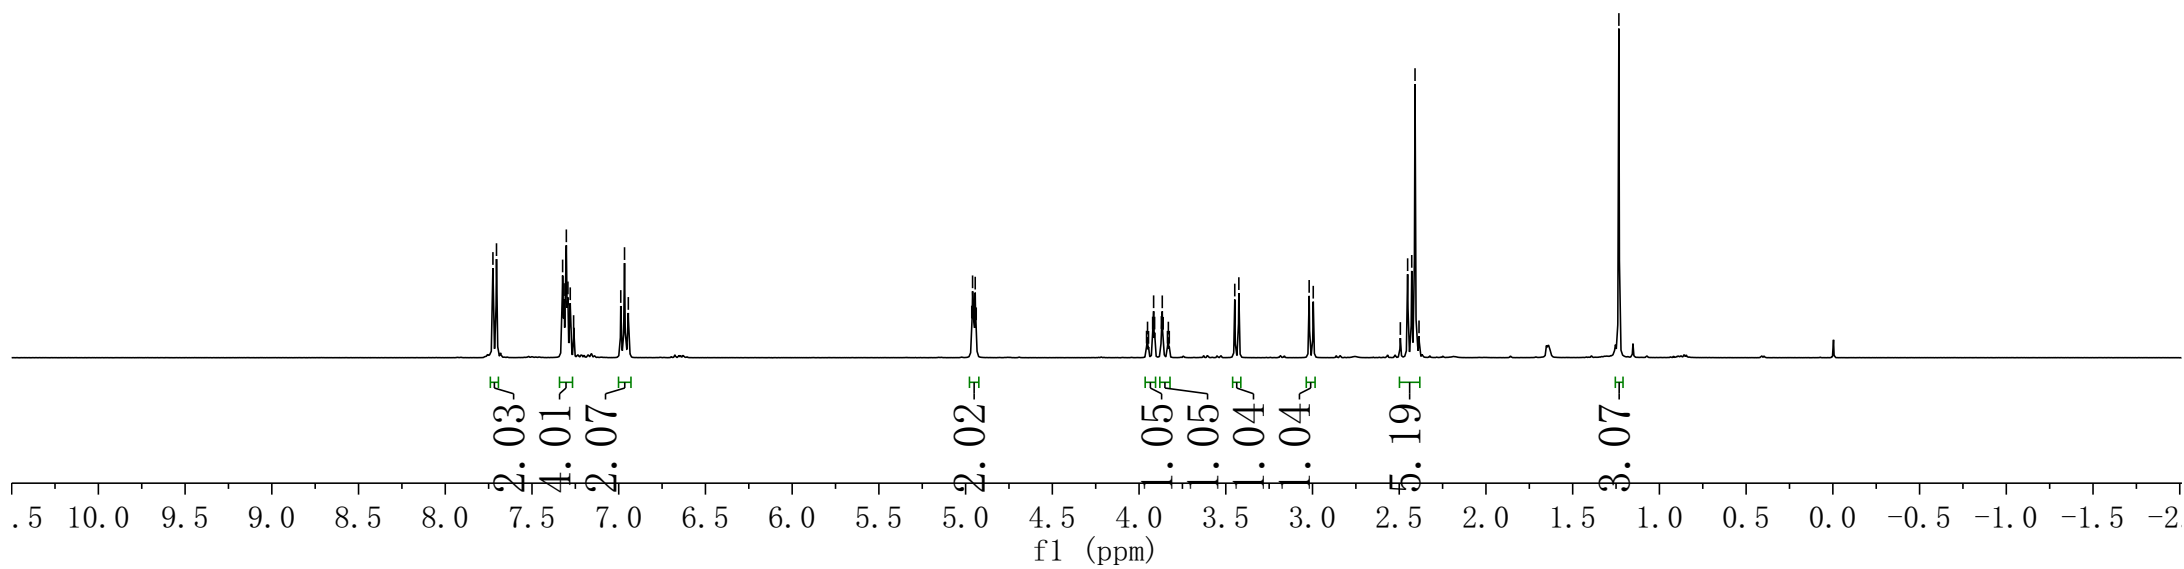

~163.397  
~160.921

-150.608

-143.663

-133.378

-133.296

-132.418

-129.640

-127.834

-119.407

-119.371

-115.510

-115.291

-109.966

-106.522

86.042

81.525

77.318

77.000

76.682

cdc13

cdc13

cdc13

58.685

52.219

45.258

-29.979

-23.384

-21.531

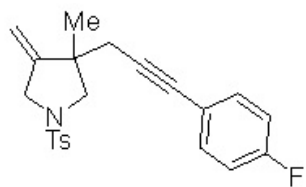

**3g** <sup>13</sup>C NMR (100 MHz, CDCl<sub>3</sub>)

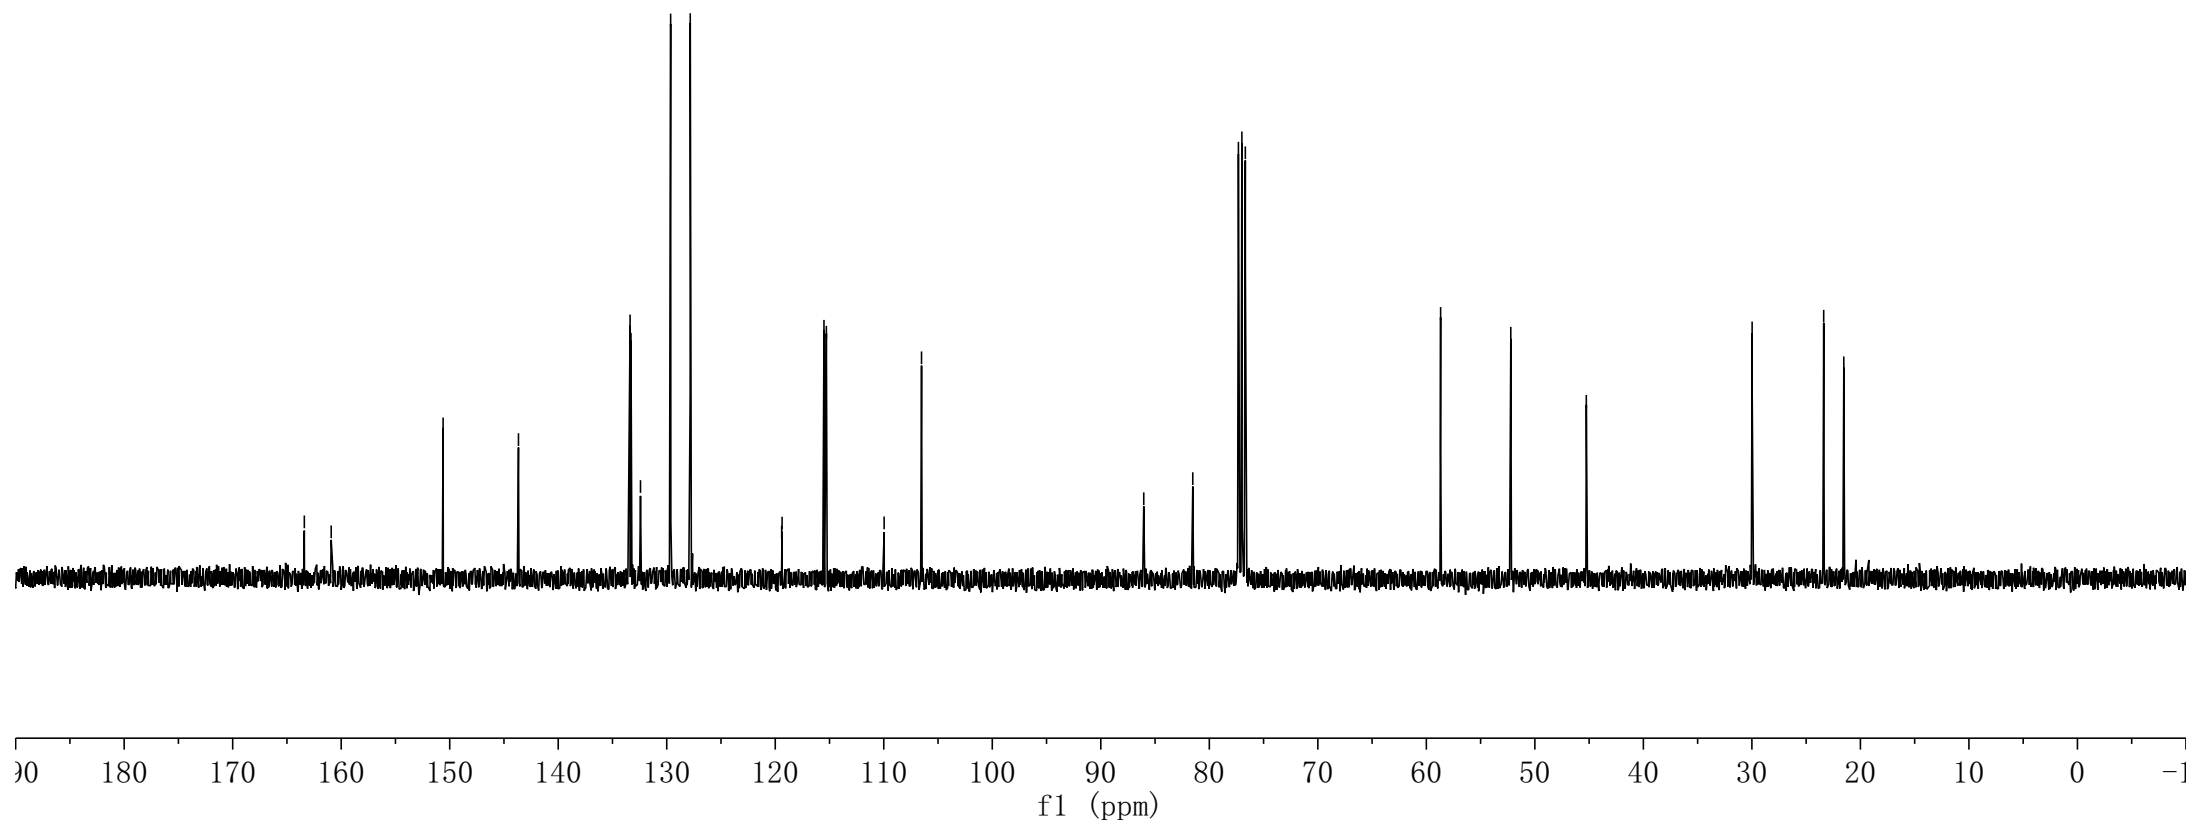

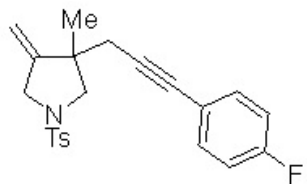

**3g**  $^{19}\text{F}$  NMR (376 MHz,  $\text{CDCl}_3$ )

--111.623

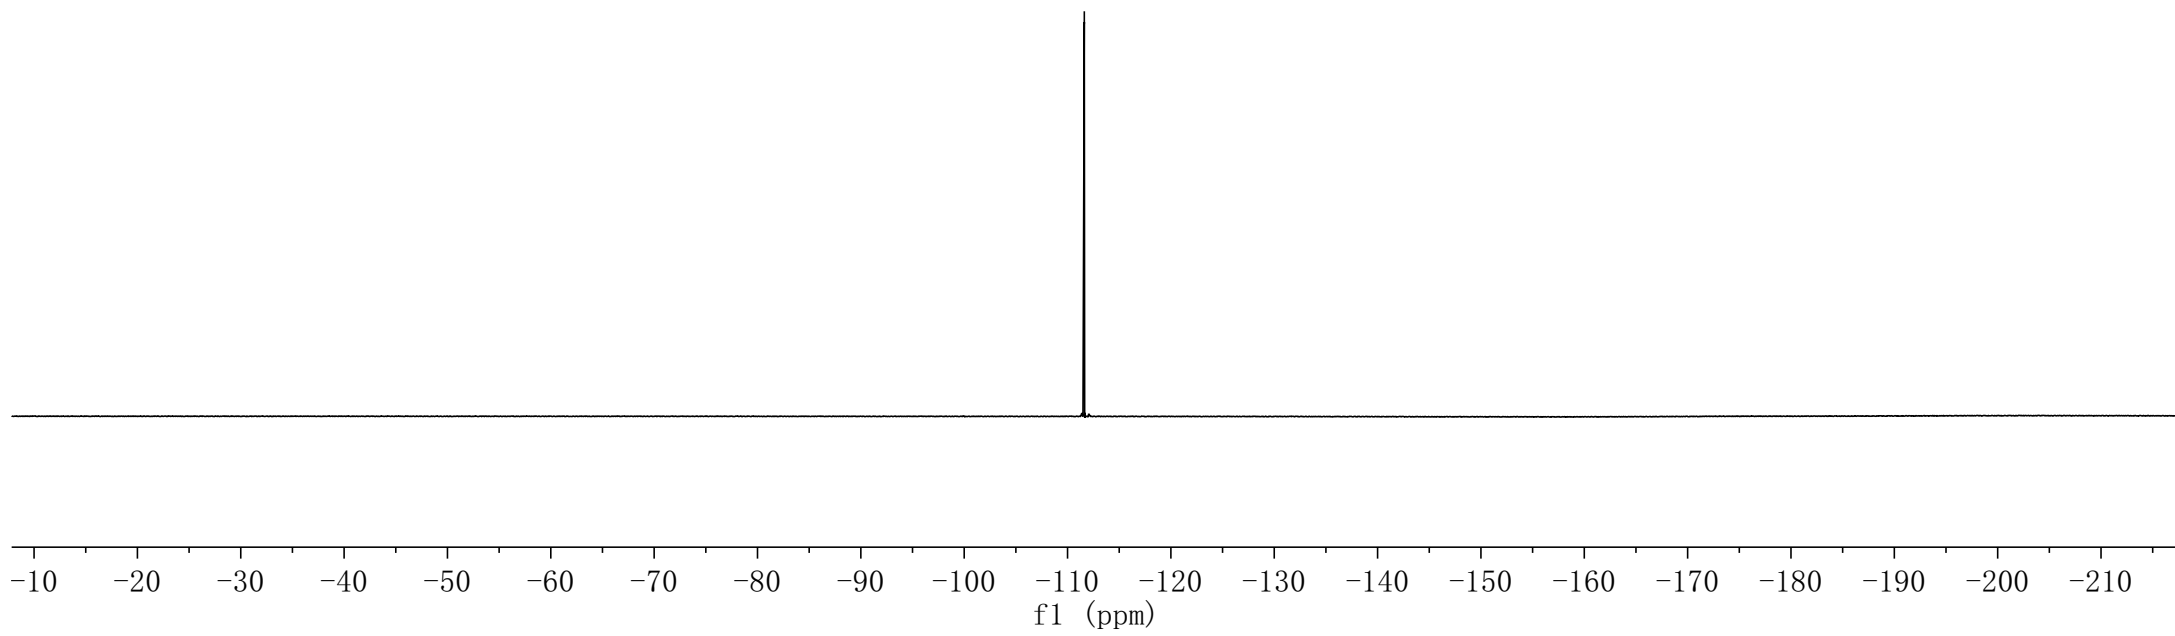

7.725  
7.705  
7.322  
7.302  
7.246

4.970  
4.964  
4.960  
4.951  
4.946  
4.941  
3.957  
3.952  
3.946  
3.923  
3.917  
3.911  
3.871  
3.865  
3.860  
3.836  
3.830  
3.825  
3.446  
3.423  
3.018  
2.994  
2.506  
2.464  
2.439  
2.407  
1.234  
0.000

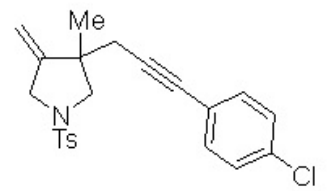

3h <sup>1</sup>H NMR (400 MHz, CDCl<sub>3</sub>)

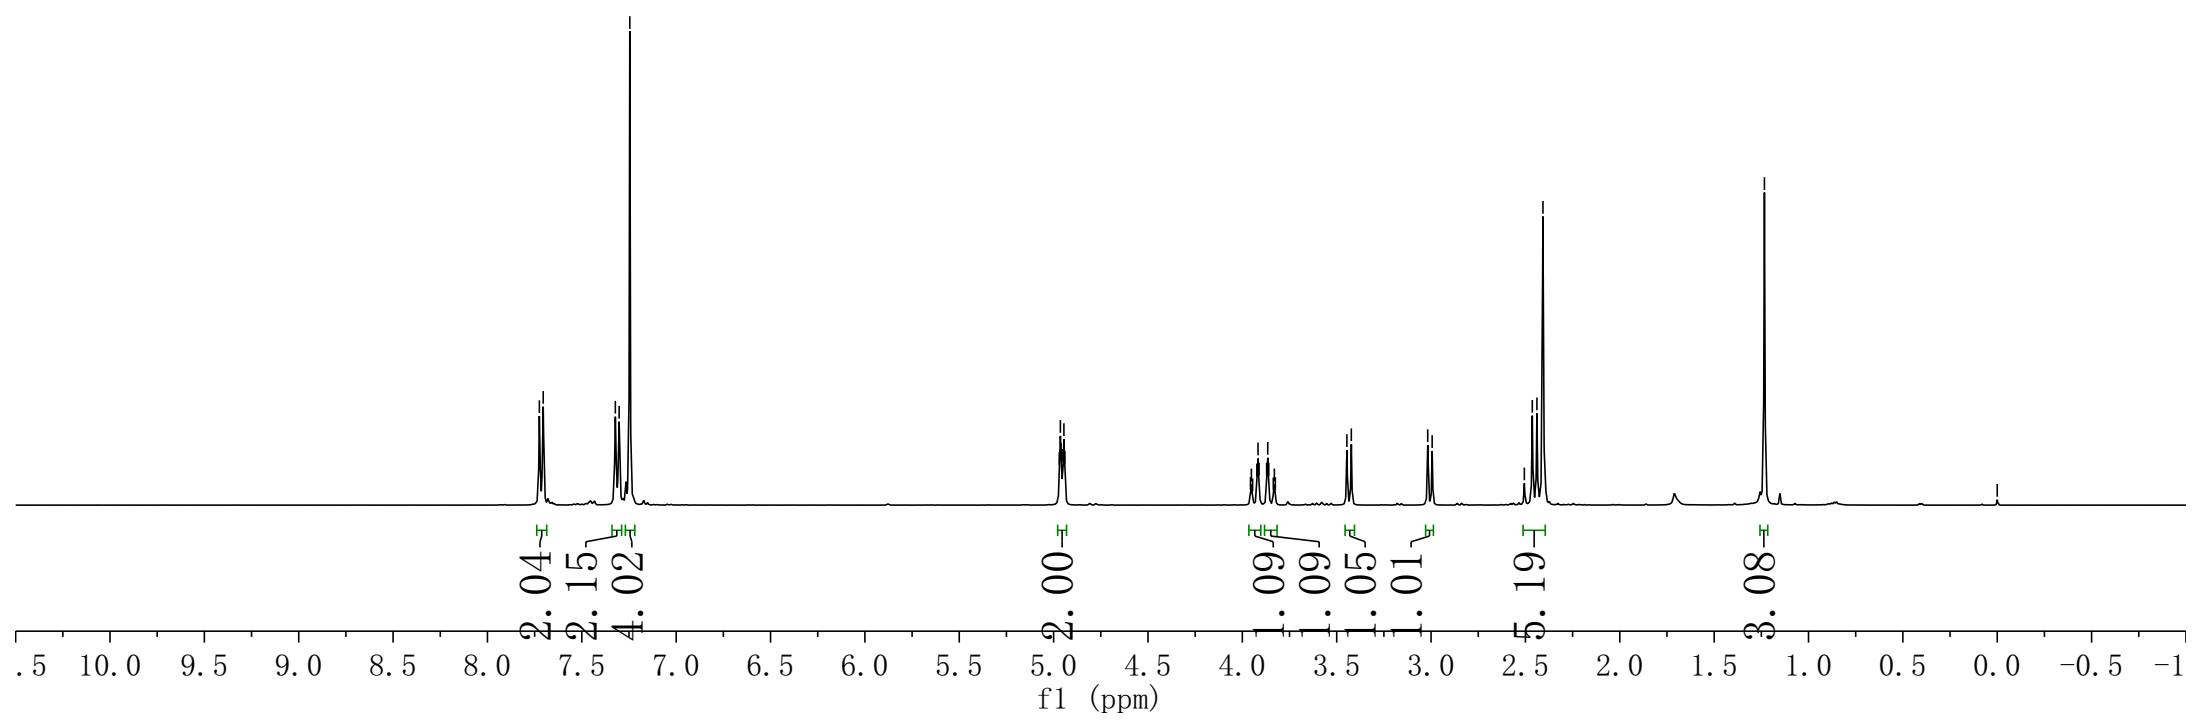

-150.520  
-143.652  
-133.732  
-132.724  
-132.401  
-129.613  
-128.445  
-127.790  
-121.802  
-106.541

87.494  
81.504  
77.317  
77.000  
76.682

58.651  
52.190  
45.209

30.003  
23.373  
21.488

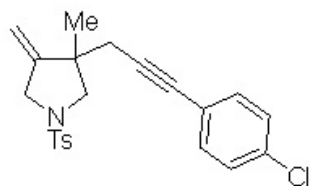

3h <sup>13</sup>C NMR (100 MHz, CDCl<sub>3</sub>)

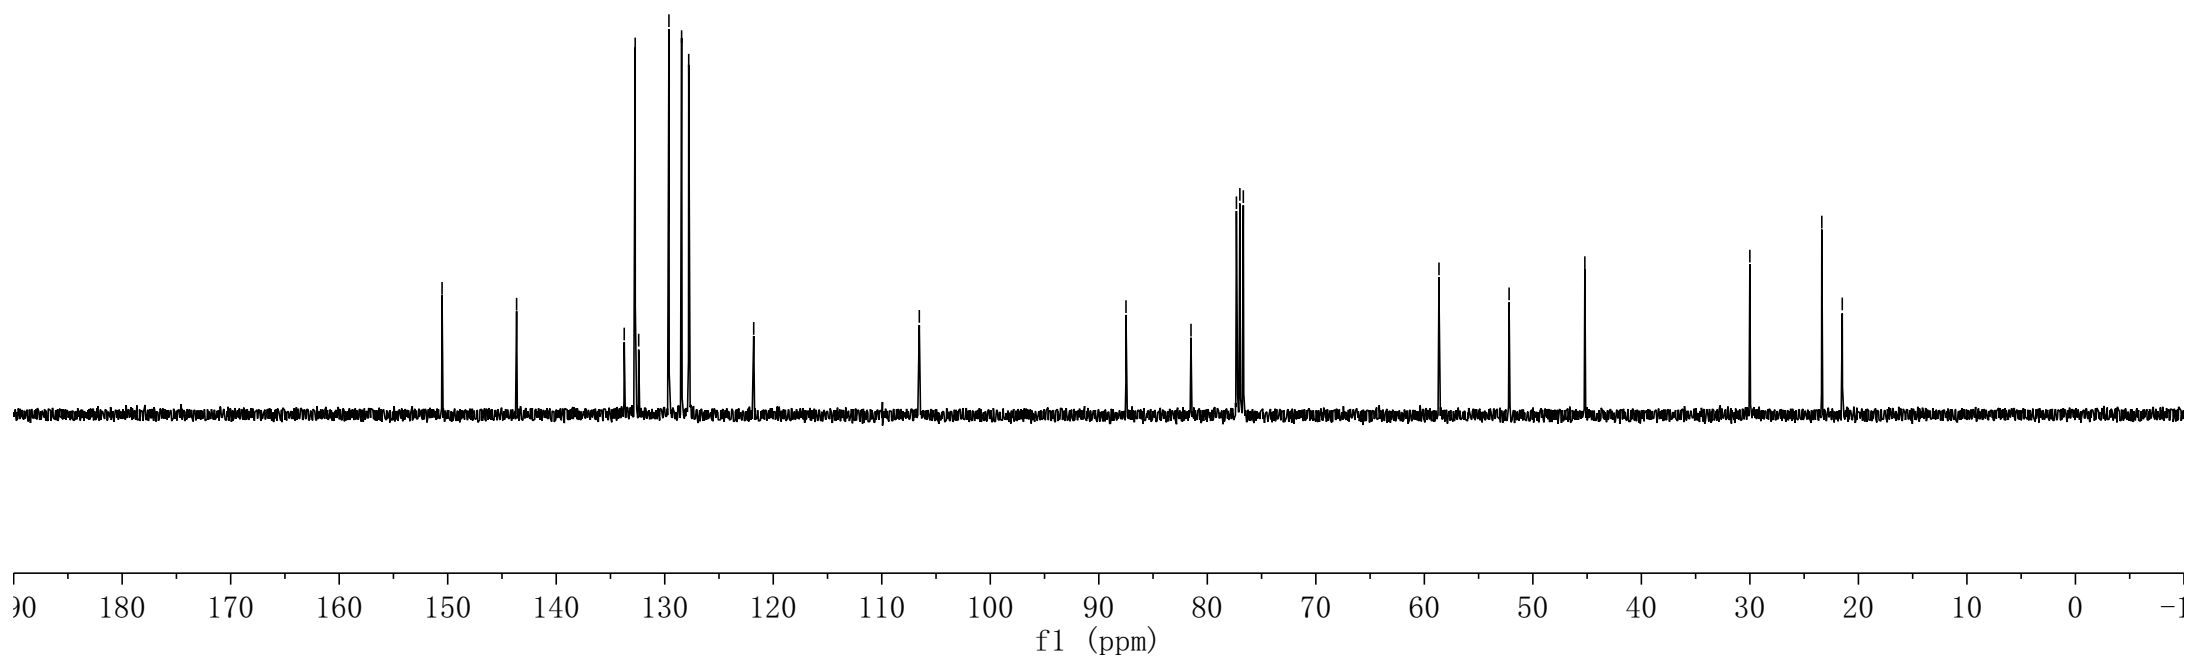

7.717  
7.697  
7.574  
7.553  
7.417  
7.396  
7.330  
7.310  
7.260

4.976  
4.972  
4.967  
4.954  
4.948  
4.943  
3.985  
3.980  
3.974  
3.950  
3.944  
3.939  
3.832  
3.827  
3.821  
3.797  
3.791  
3.786  
3.453  
3.429  
2.977  
2.953  
2.565  
2.523  
2.492  
2.450  
2.413  
1.230

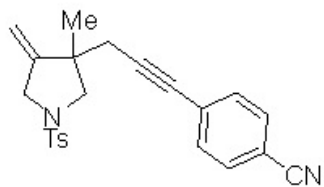

3i <sup>1</sup>H NMR (400 MHz, CDCl<sub>3</sub>)

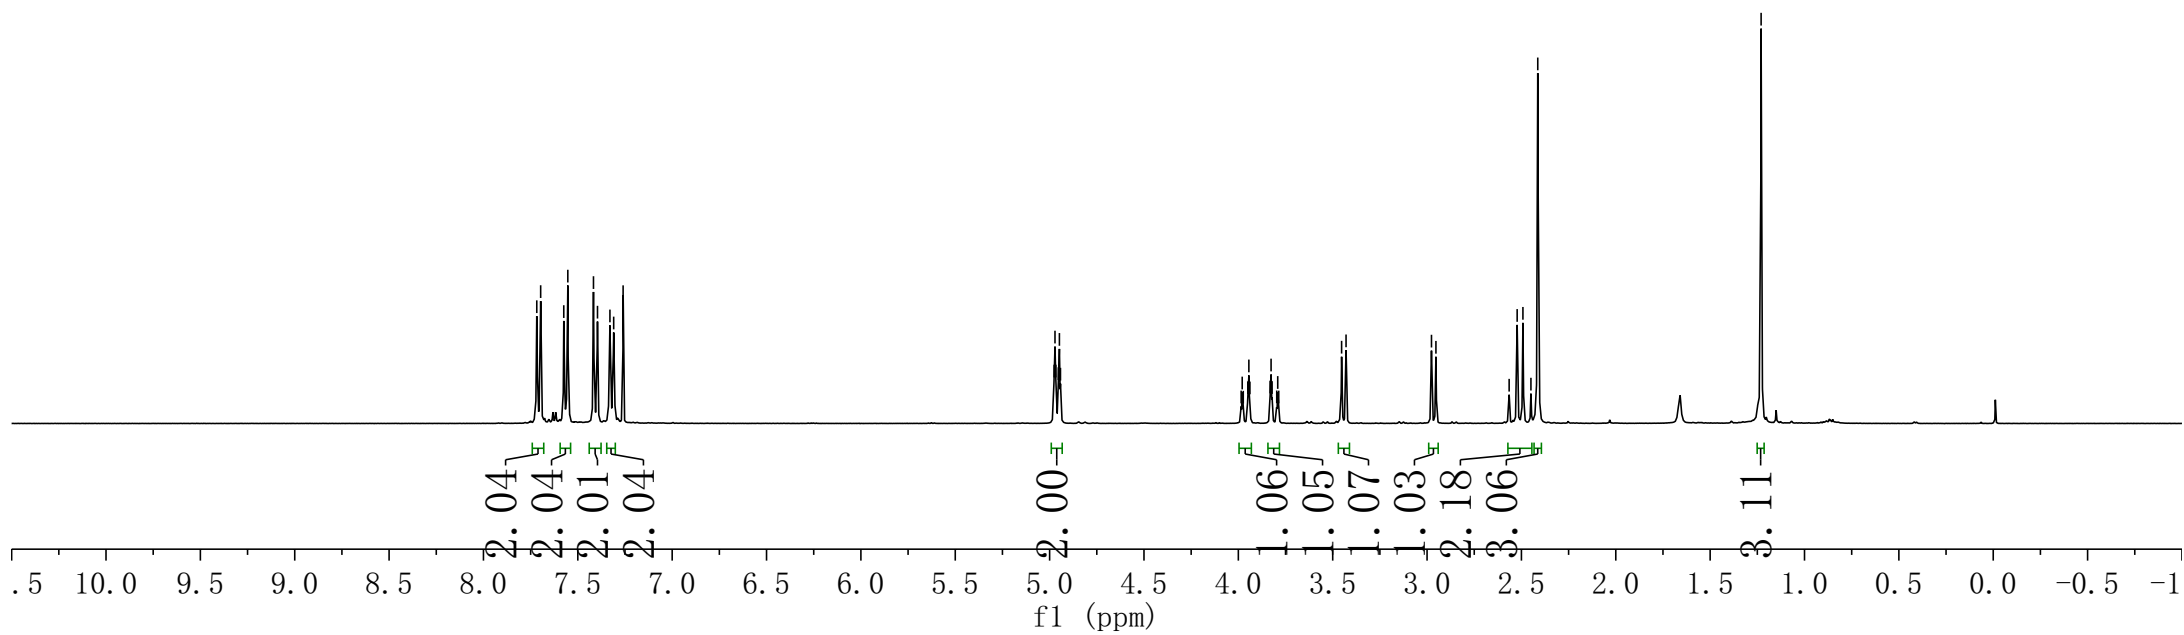

150.369  
143.724  
132.401  
132.094  
131.883  
129.655  
128.301  
127.804  
118.444  
111.170  
106.740

-91.513  
81.315  
77.318  
77.000  
76.682

58.655  
52.105  
45.178

-30.167  
23.192  
-21.522

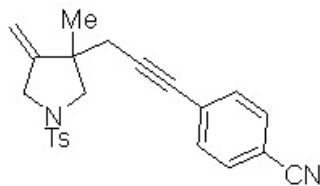

**3i**  $^{13}\text{C}$  NMR (100 MHz,  $\text{CDCl}_3$ )

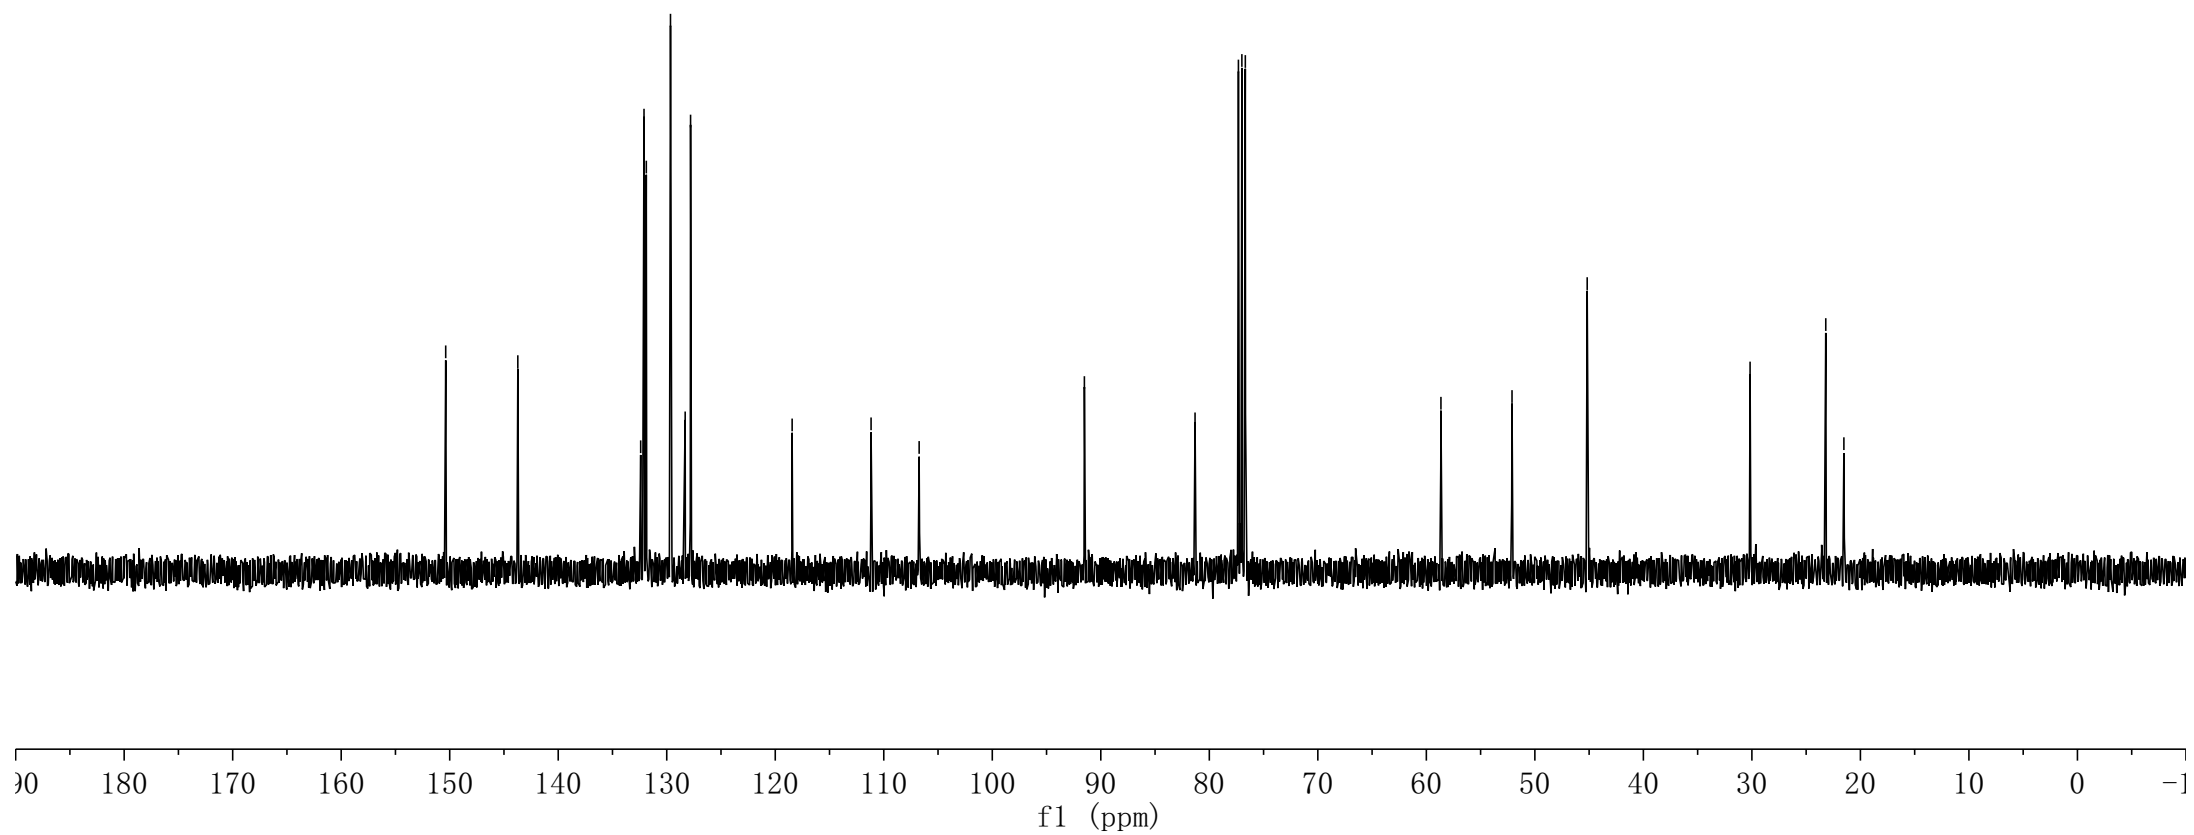



7.733  
7.713  
7.323  
7.303  
7.260  
7.188  
7.171  
7.152  
7.137  
7.117  
7.106  
7.088

4.962  
4.957  
4.951

3.959  
3.953  
3.923  
3.918  
3.912  
3.890  
3.885  
3.879  
3.855  
3.850  
3.844  
3.455  
3.431  
3.044  
3.020  
2.486  
2.444  
2.430  
2.404  
2.388  
2.319  
1.916

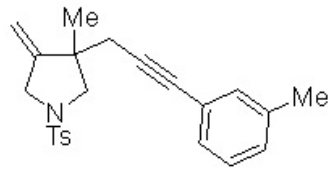

3j <sup>1</sup>H NMR (400 MHz, CDCl<sub>3</sub>)

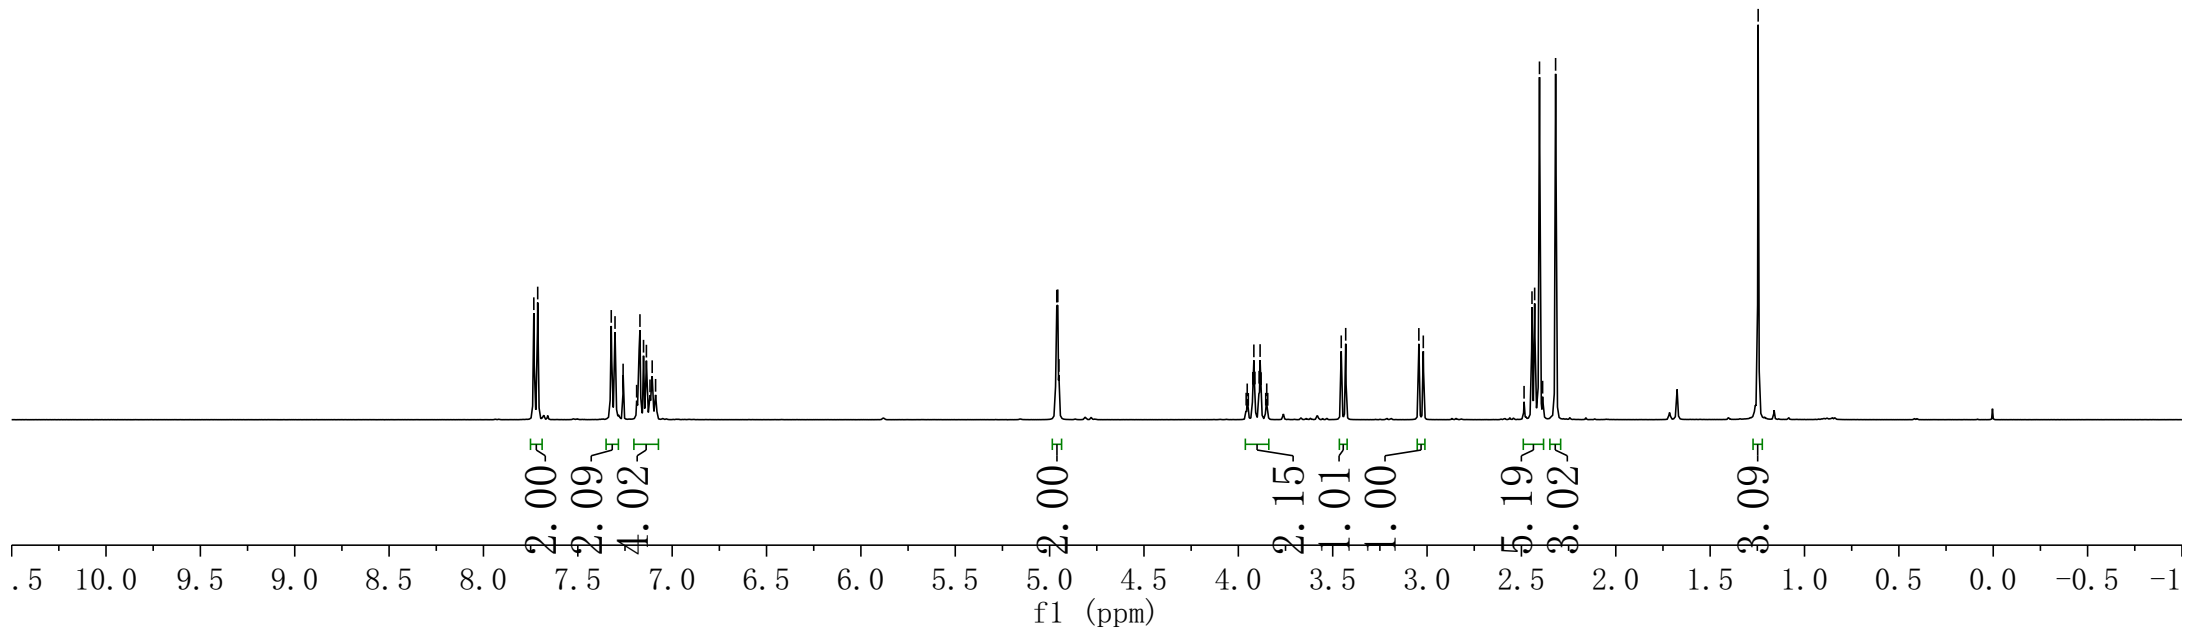

150.655  
143.635  
137.844  
132.501  
132.101  
129.635  
128.720  
128.589  
128.075  
127.816  
123.132

-106.485

85.955  
82.725  
77.318  
77.000  
76.683

58.731  
52.226  
45.295

30.005  
23.362  
21.523  
21.179

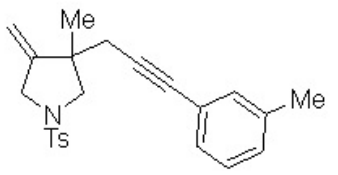

3j <sup>13</sup>C NMR (100 MHz, CDCl<sub>3</sub>)

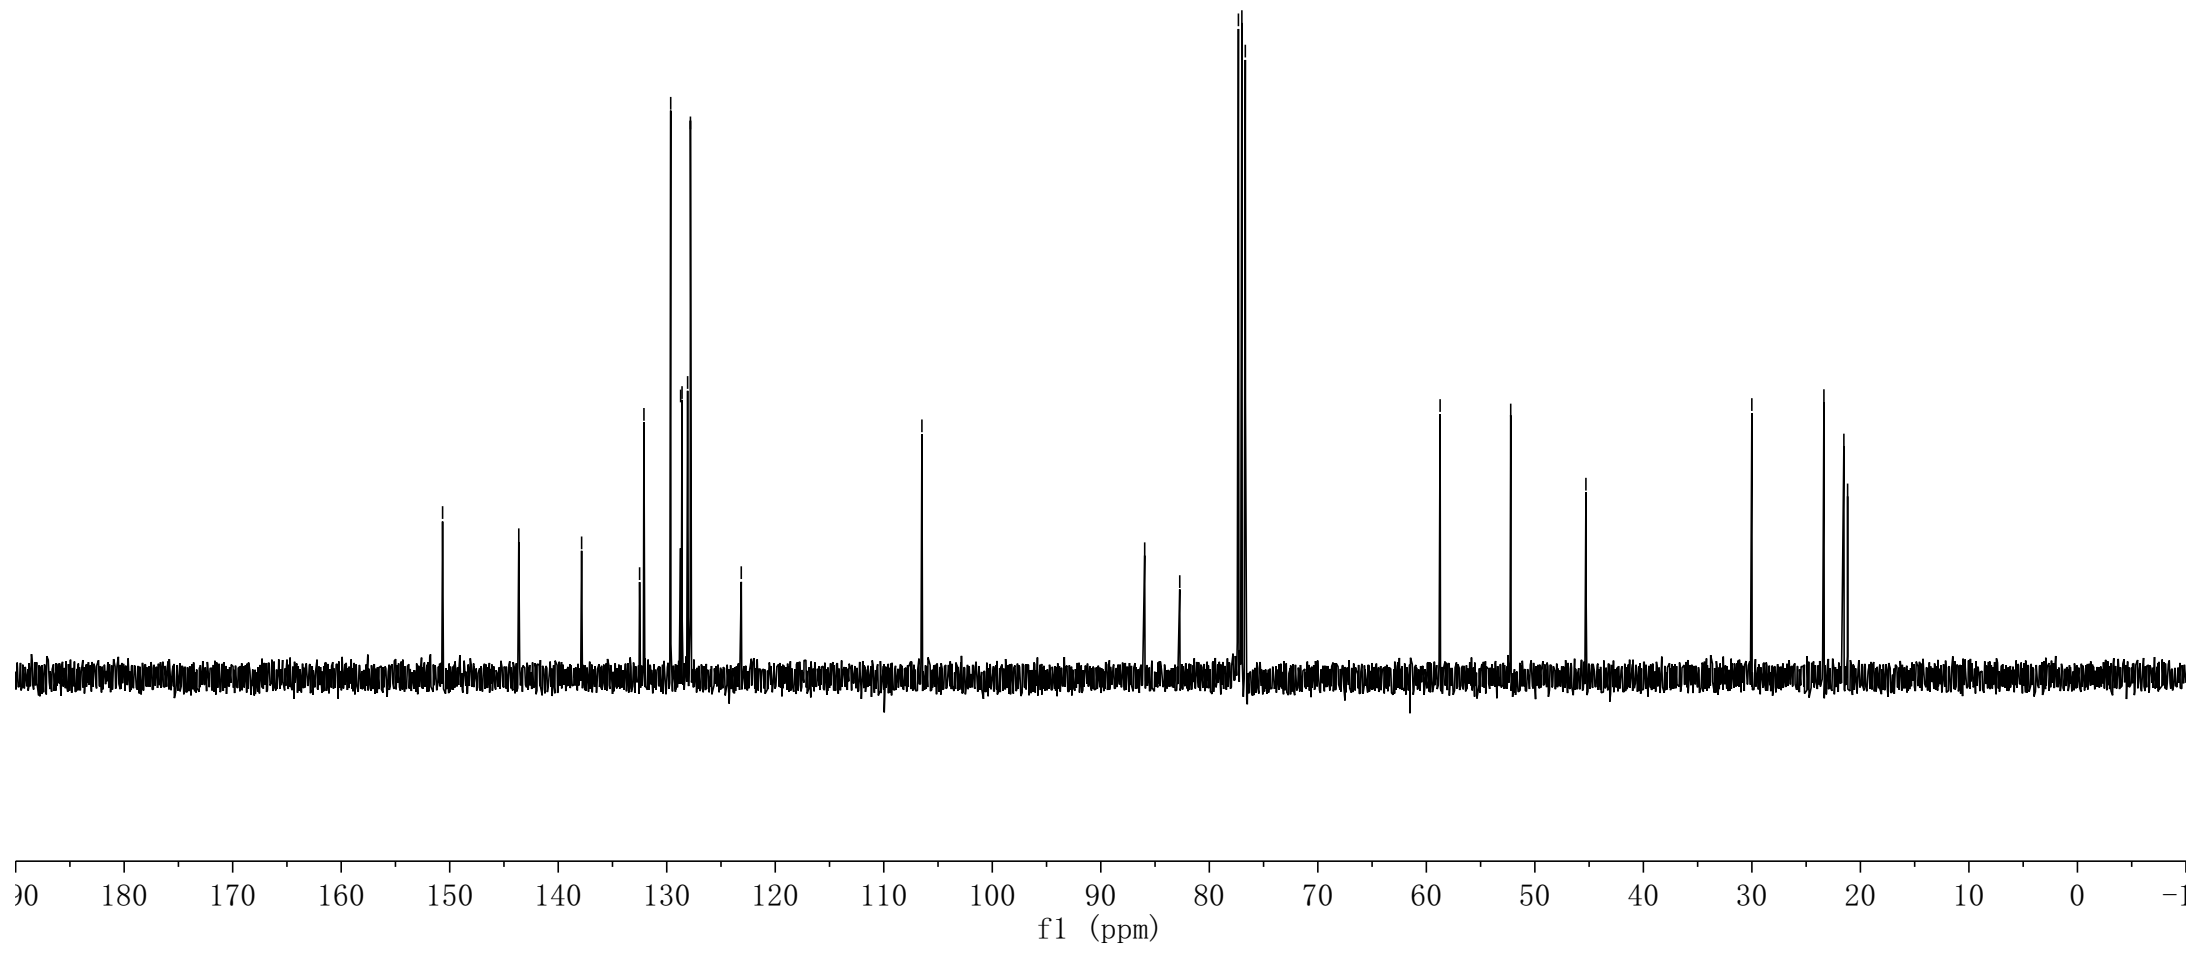

7.731  
7.710  
7.338  
7.320  
7.300  
7.276  
7.271  
7.264  
7.257  
7.251  
7.246  
7.237  
7.233  
7.076  
7.058  
7.038  
7.014  
4.982  
4.976  
4.970  
3.960  
3.955  
3.949  
3.925  
3.919  
3.914  
3.891  
3.886  
3.881  
3.856  
3.851  
3.846  
3.460  
3.436  
3.054  
3.030  
2.477  
2.473  
2.400  
1.260  
-0.000

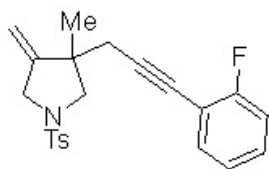

**3k**  $^1\text{H}$  NMR (400 MHz,  $\text{CDCl}_3$ )

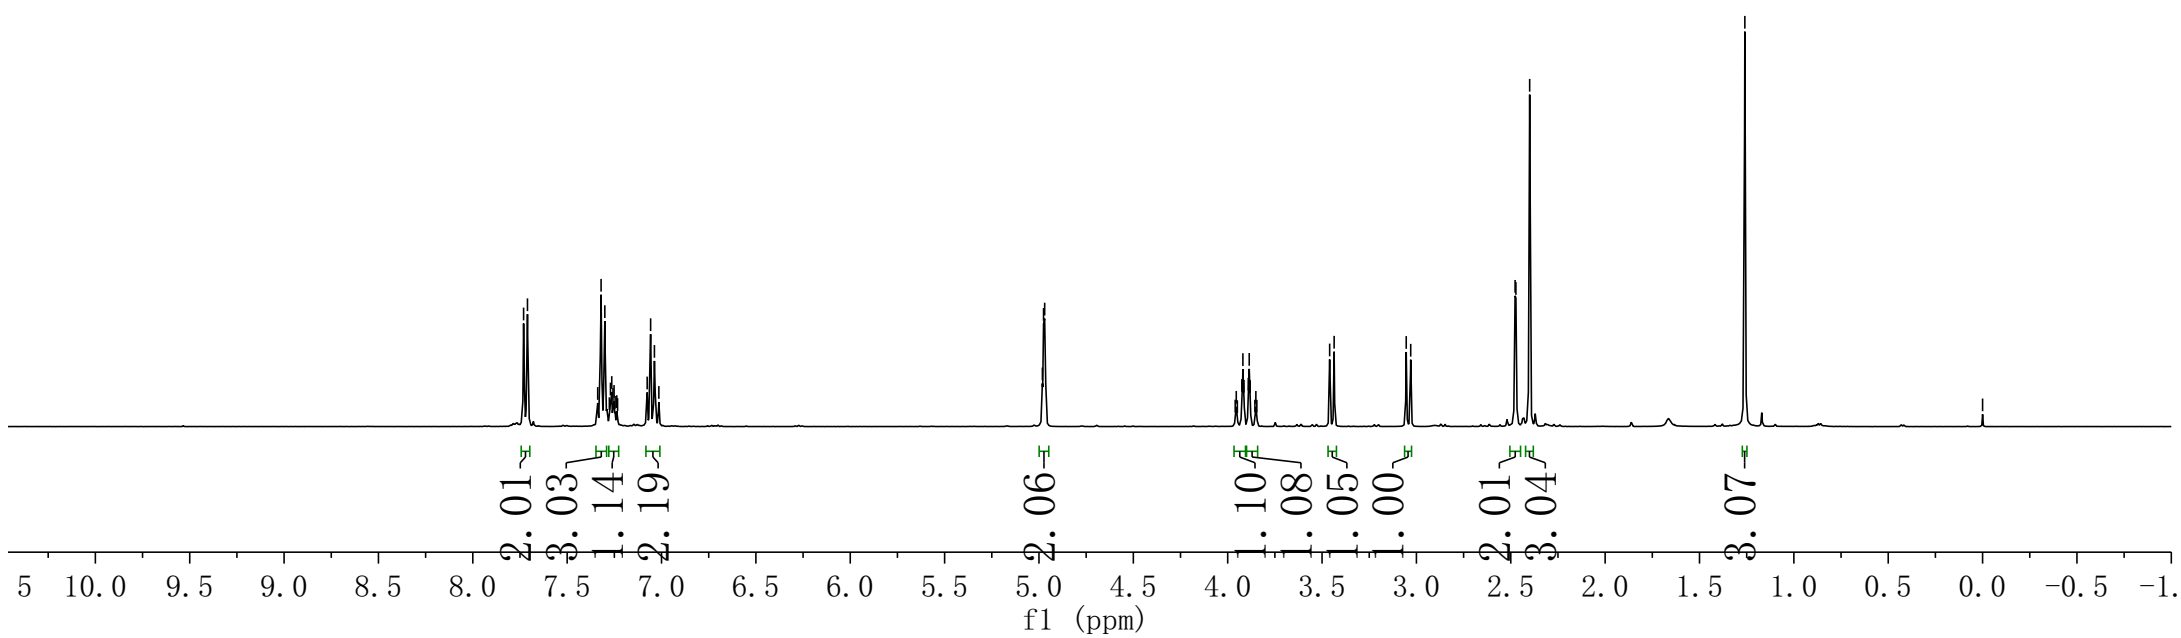

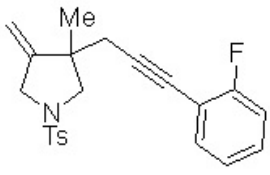

**3k** <sup>13</sup>C NMR (100 MHz, CDCl<sub>3</sub>)

- ~164.034
- ~161.541
- 150.377
- 143.614
- 133.336
- 133.323
- ~132.351
- 129.597
- 129.473
- 129.395
- 127.749
- 123.765
- 123.728
- 115.364
- 115.156
- 111.829
- 111.672
- 106.628
- 91.913
- 91.880
- 77.318
- 77.000
- 76.681
- 75.901
- 75.895
- 58.665
- 52.152
- 45.166

- 30.114
- 23.234
- 21.459

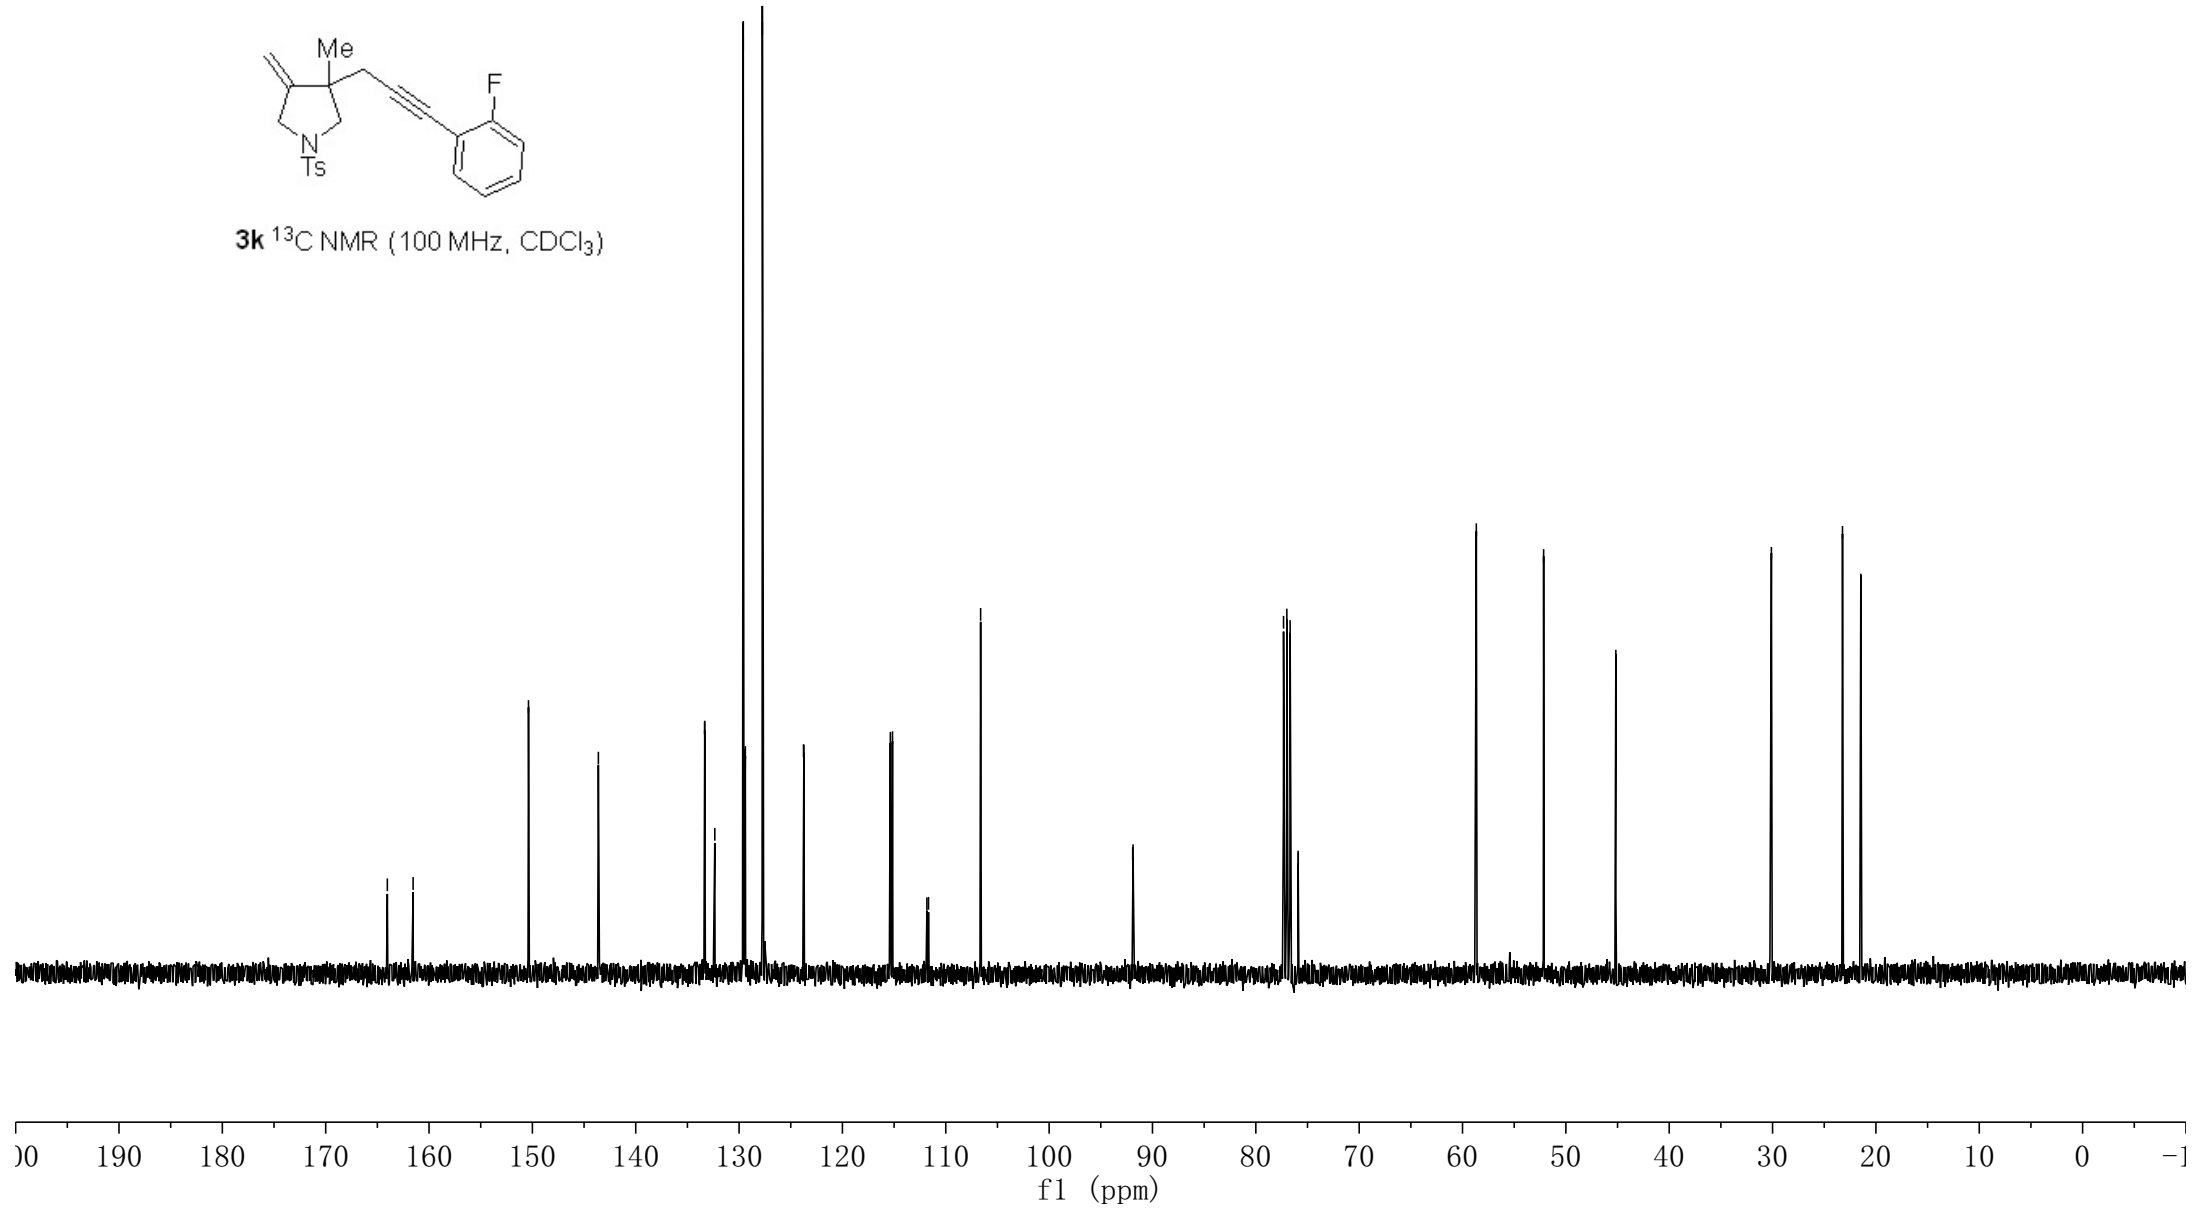

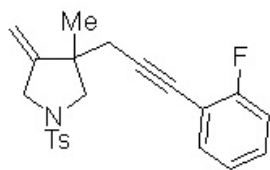

3k  $^{19}\text{F}$  NMR (376 MHz,  $\text{CDCl}_3$ )

--110.631

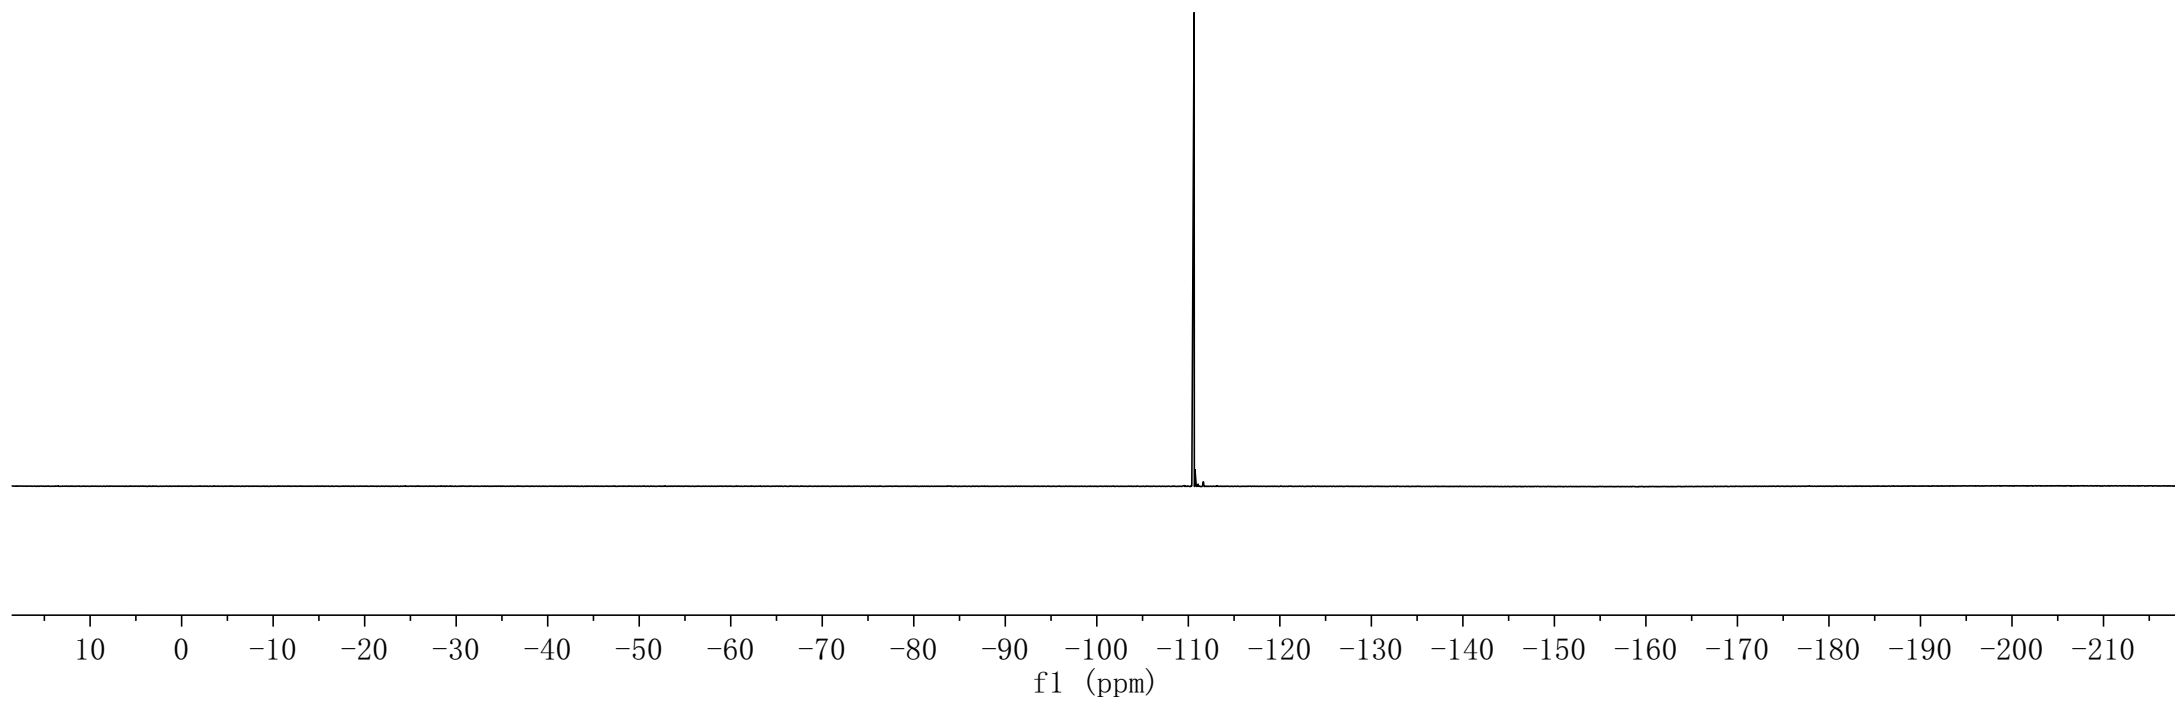

8.263  
8.242  
7.857  
7.837  
7.814  
7.793  
7.735  
7.715  
7.581  
7.564  
7.540  
7.517  
7.500  
7.421  
7.402  
7.383  
7.260  
7.254  
7.234

5.030  
5.024  
4.015  
3.980  
3.946  
3.911  
3.567  
3.543  
3.122  
3.098  
2.689  
2.647  
2.623  
2.581  
2.330  
-1.338

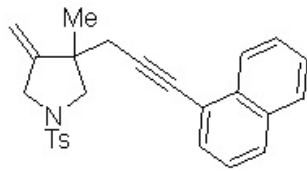

**31** <sup>1</sup>H NMR (400 MHz, CDCl<sub>3</sub>)

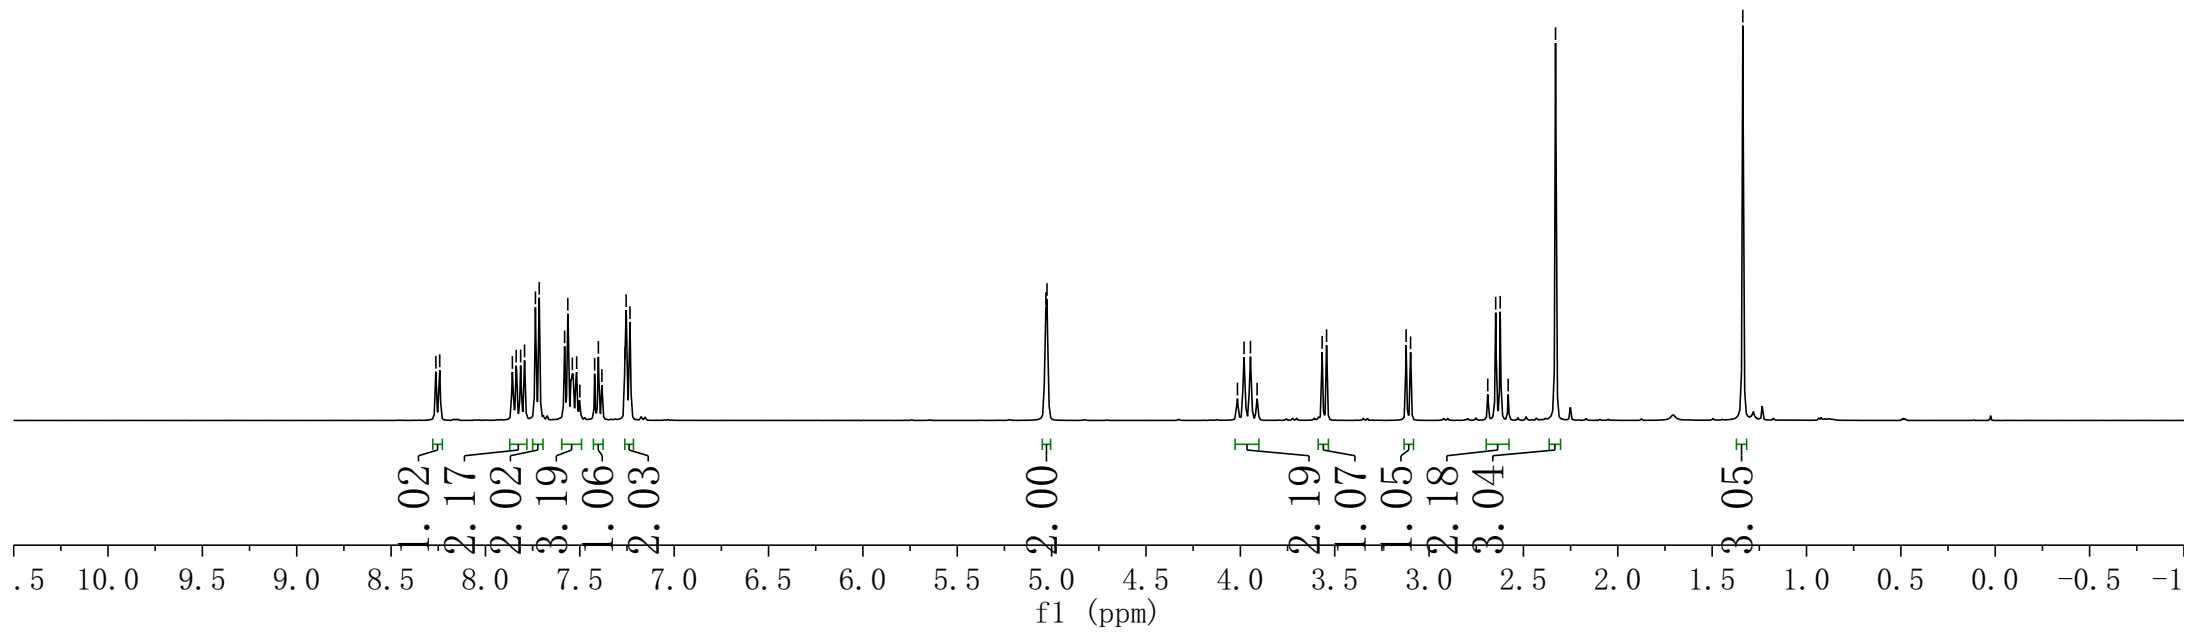

150.611  
143.606  
133.327  
133.069  
132.388  
130.237  
129.567  
128.215  
128.177  
127.736  
126.561  
126.236  
126.013  
125.090  
120.990  
-106.611

-91.293  
80.623  
77.319  
77.000  
76.682

58.749  
52.260  
45.390

30.277  
23.647  
21.400

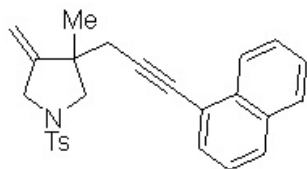

**3I**  $^{13}\text{C}$  NMR (100 MHz,  $\text{CDCl}_3$ )

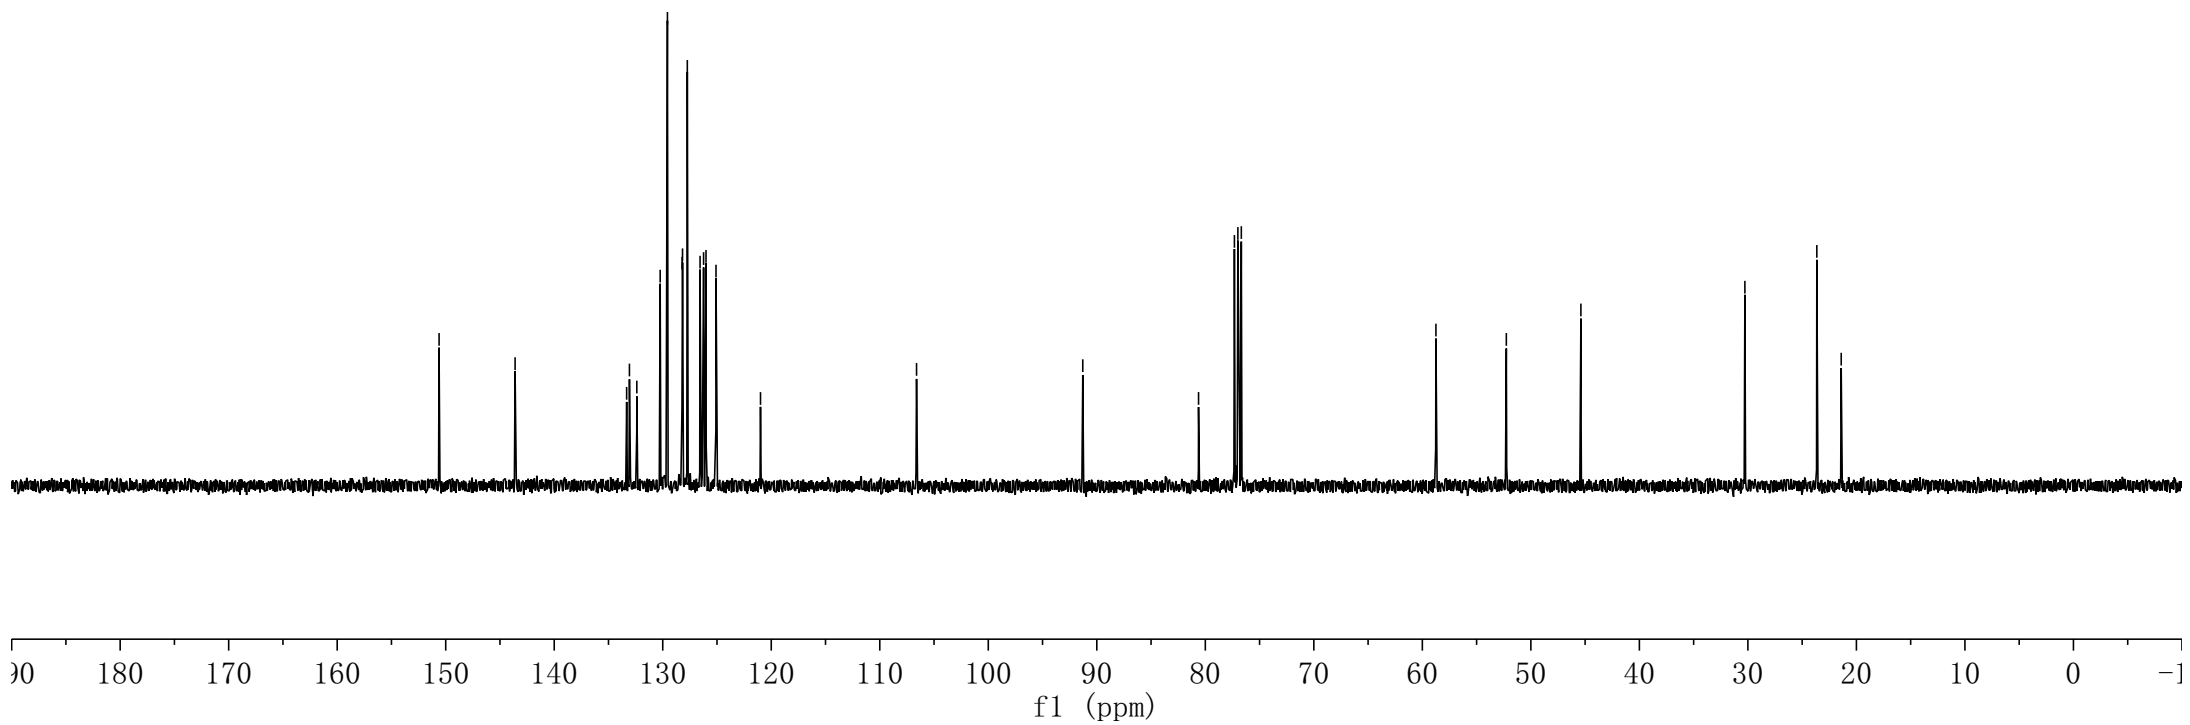

7.859  
7.813  
7.800  
7.790  
7.780  
7.765  
7.759  
7.748  
7.738  
7.728  
7.506  
7.489  
7.480  
7.470  
7.467  
7.454  
7.389  
7.368  
7.309  
7.288  
7.260  
4.999  
4.994  
4.988  
3.990  
3.985  
3.980  
3.954  
3.950  
3.945  
3.917  
3.912  
3.907  
3.882  
3.877  
3.873  
3.512  
3.488  
3.085  
3.062  
2.560  
2.518  
2.500  
2.457  
2.353  
1.

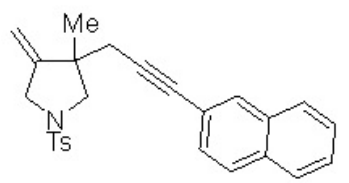

3m <sup>1</sup>H NMR (400 MHz, CDCl<sub>3</sub>)

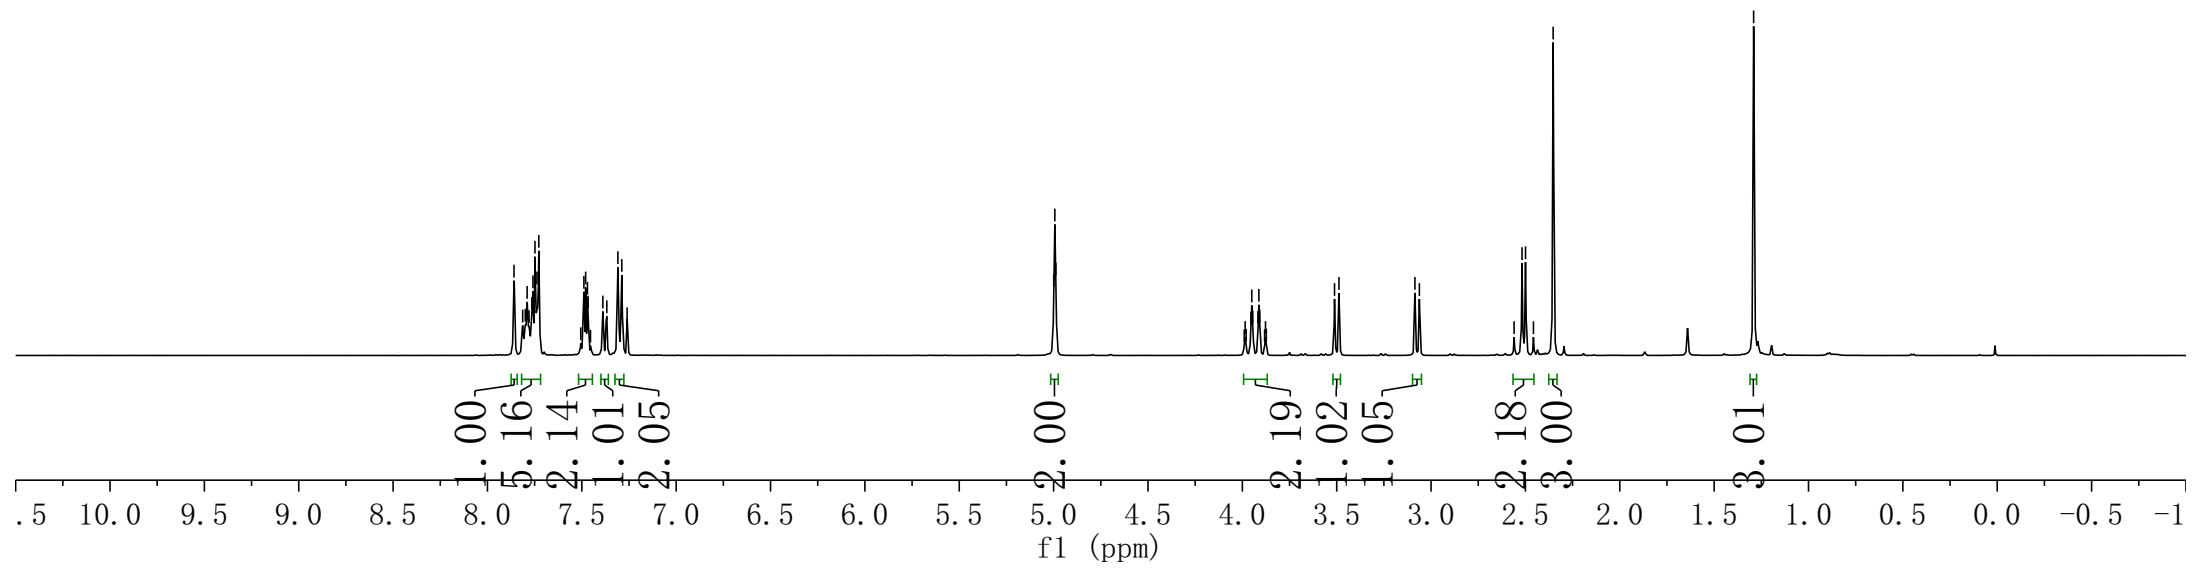



150.774  
143.663  
132.902  
132.544  
132.433  
131.142  
129.631  
128.494  
127.826  
127.807  
127.671  
127.540  
126.451  
126.427  
120.614  
-106.556

86.761  
82.950  
77.318  
77.000  
76.682

58.750  
52.276  
45.343

30.138  
23.487  
21.471

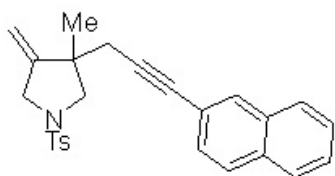

**3m**  $^{13}\text{C}$  NMR (100 MHz,  $\text{CDCl}_3$ )

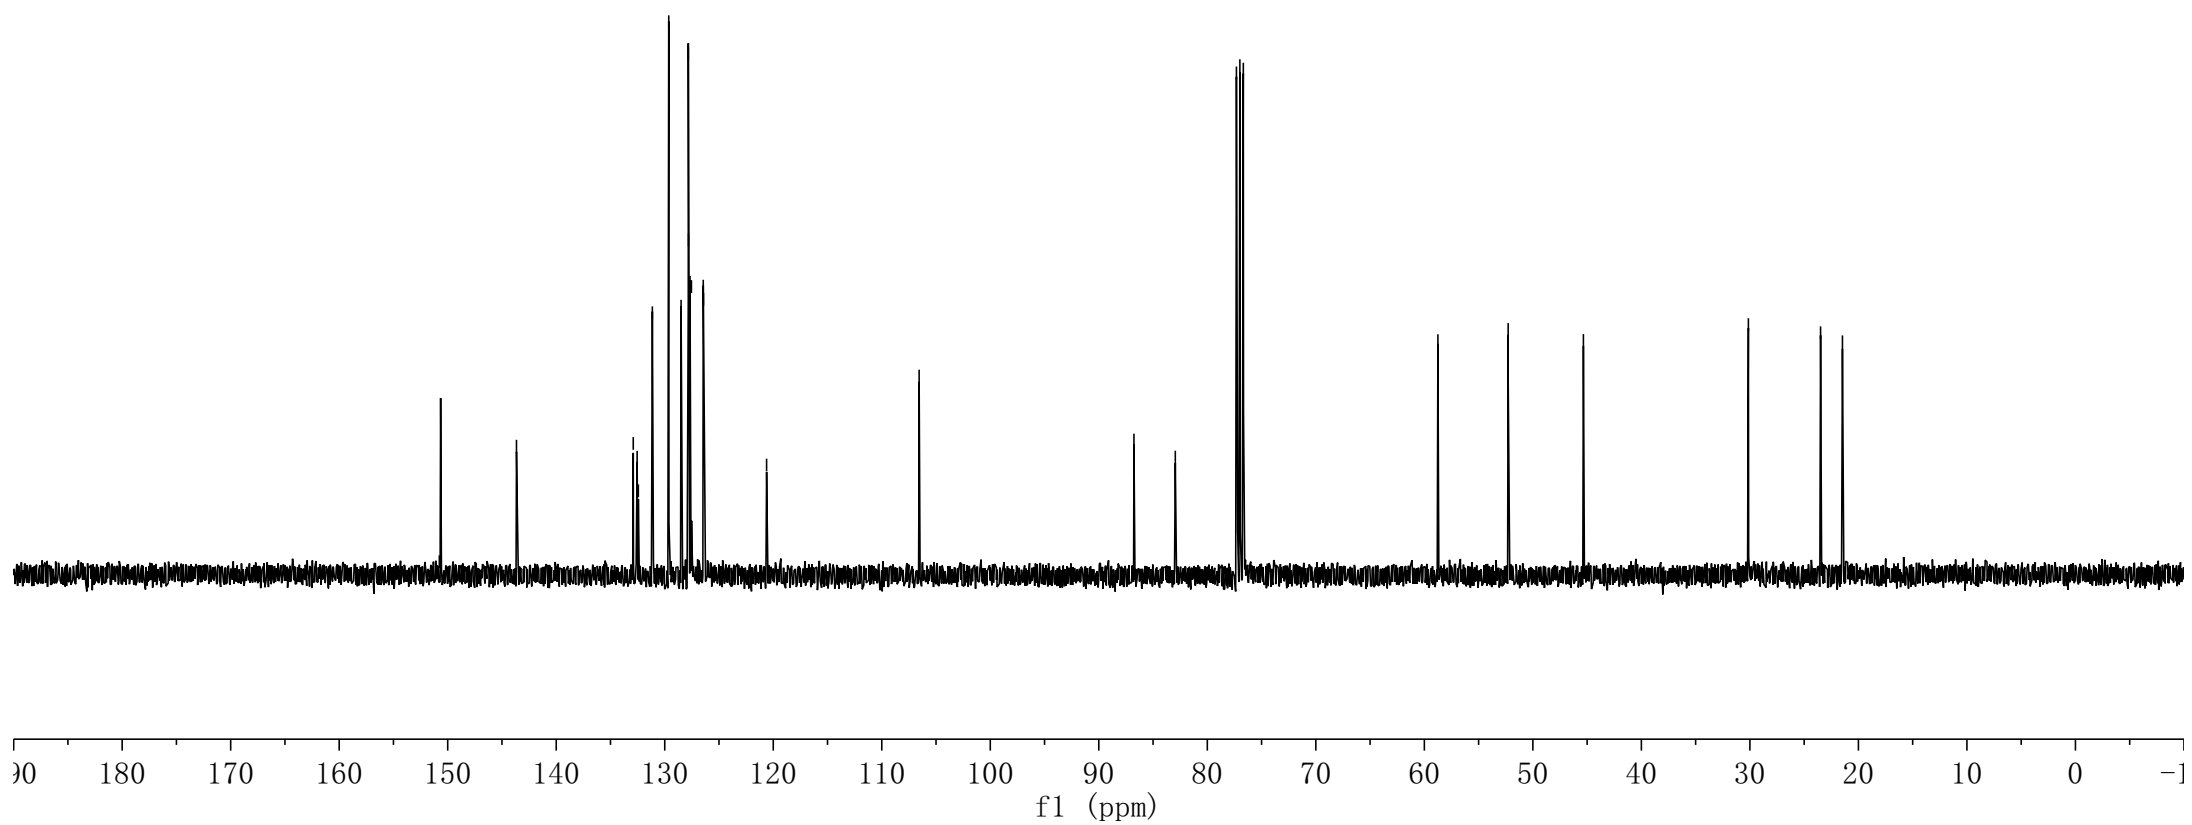

7.725  
7.705  
7.327  
7.307  
7.297  
7.294  
7.290  
7.287  
7.260  
7.237  
7.229  
7.224  
7.217  
7.007  
7.004  
6.995  
6.992  
4.958  
4.953  
4.946  
4.939  
4.933  
3.944  
3.939  
3.933  
3.909  
3.904  
3.898  
3.874  
3.868  
3.863  
3.839  
3.833  
3.828  
3.437  
3.414  
3.023  
3.000  
2.481  
2.439  
2.417  
2.376  
1.229

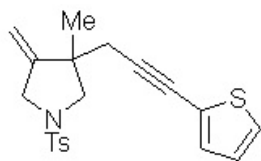

**3n**  $^1\text{H}$  NMR (400 MHz,  $\text{CDCl}_3$ )

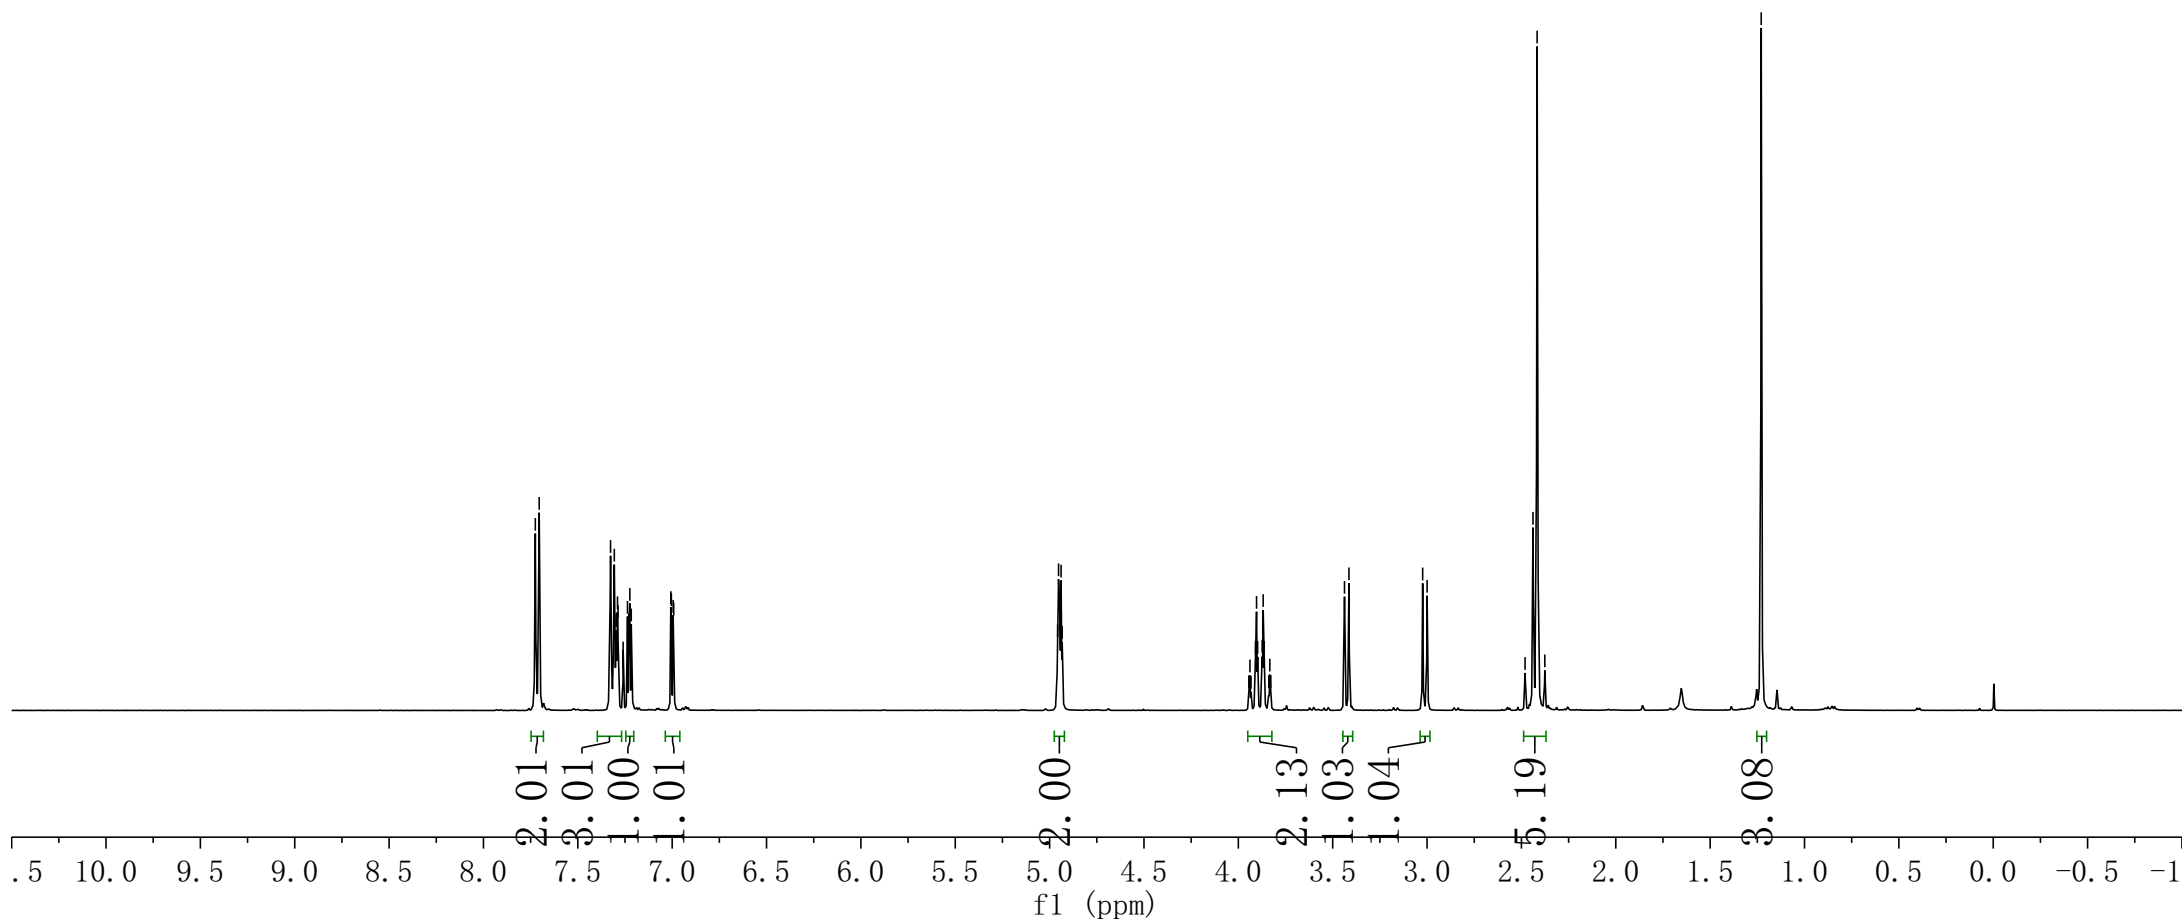

-150.629  
-143.652  
-132.425  
-129.855  
-129.644  
-128.007  
-127.829  
-125.056  
-122.281  
-106.485

85.892  
77.611  
77.318  
77.000  
76.682

58.685  
52.239  
45.249

30.028  
23.453  
21.537

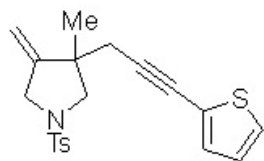

3n <sup>13</sup>C NMR (100 MHz, CDCl<sub>3</sub>)

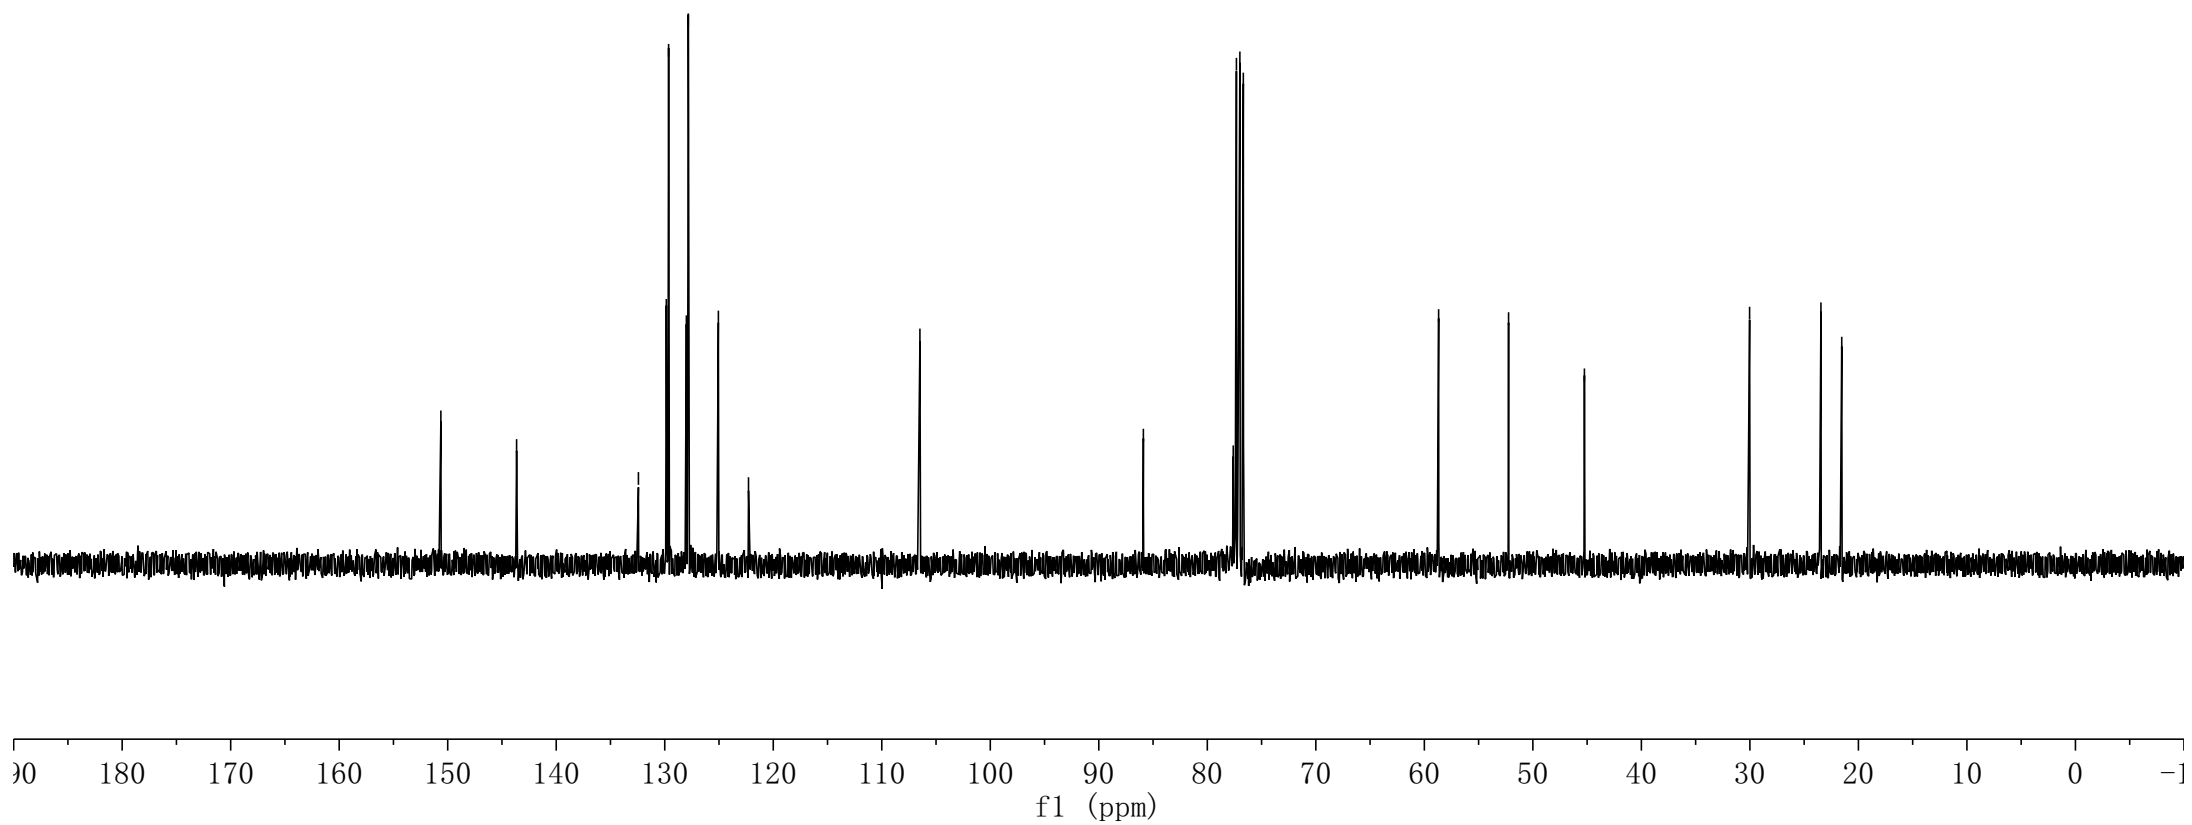

8.539  
8.501  
7.720  
7.699  
7.619  
7.600  
7.327  
7.306  
7.260  
7.227  
7.215  
7.208  
7.196

4.972  
4.952  
3.963  
3.959  
3.953  
3.928  
3.923  
3.918  
3.856  
3.820  
3.816  
3.440  
3.416  
3.007  
2.984  
2.545  
2.503  
2.477  
2.435  
2.408  
1.785  
1.241

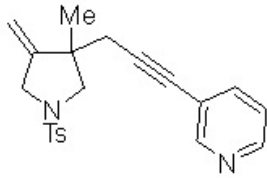

**3o** <sup>1</sup>H NMR (400 MHz, CDCl<sub>3</sub>)

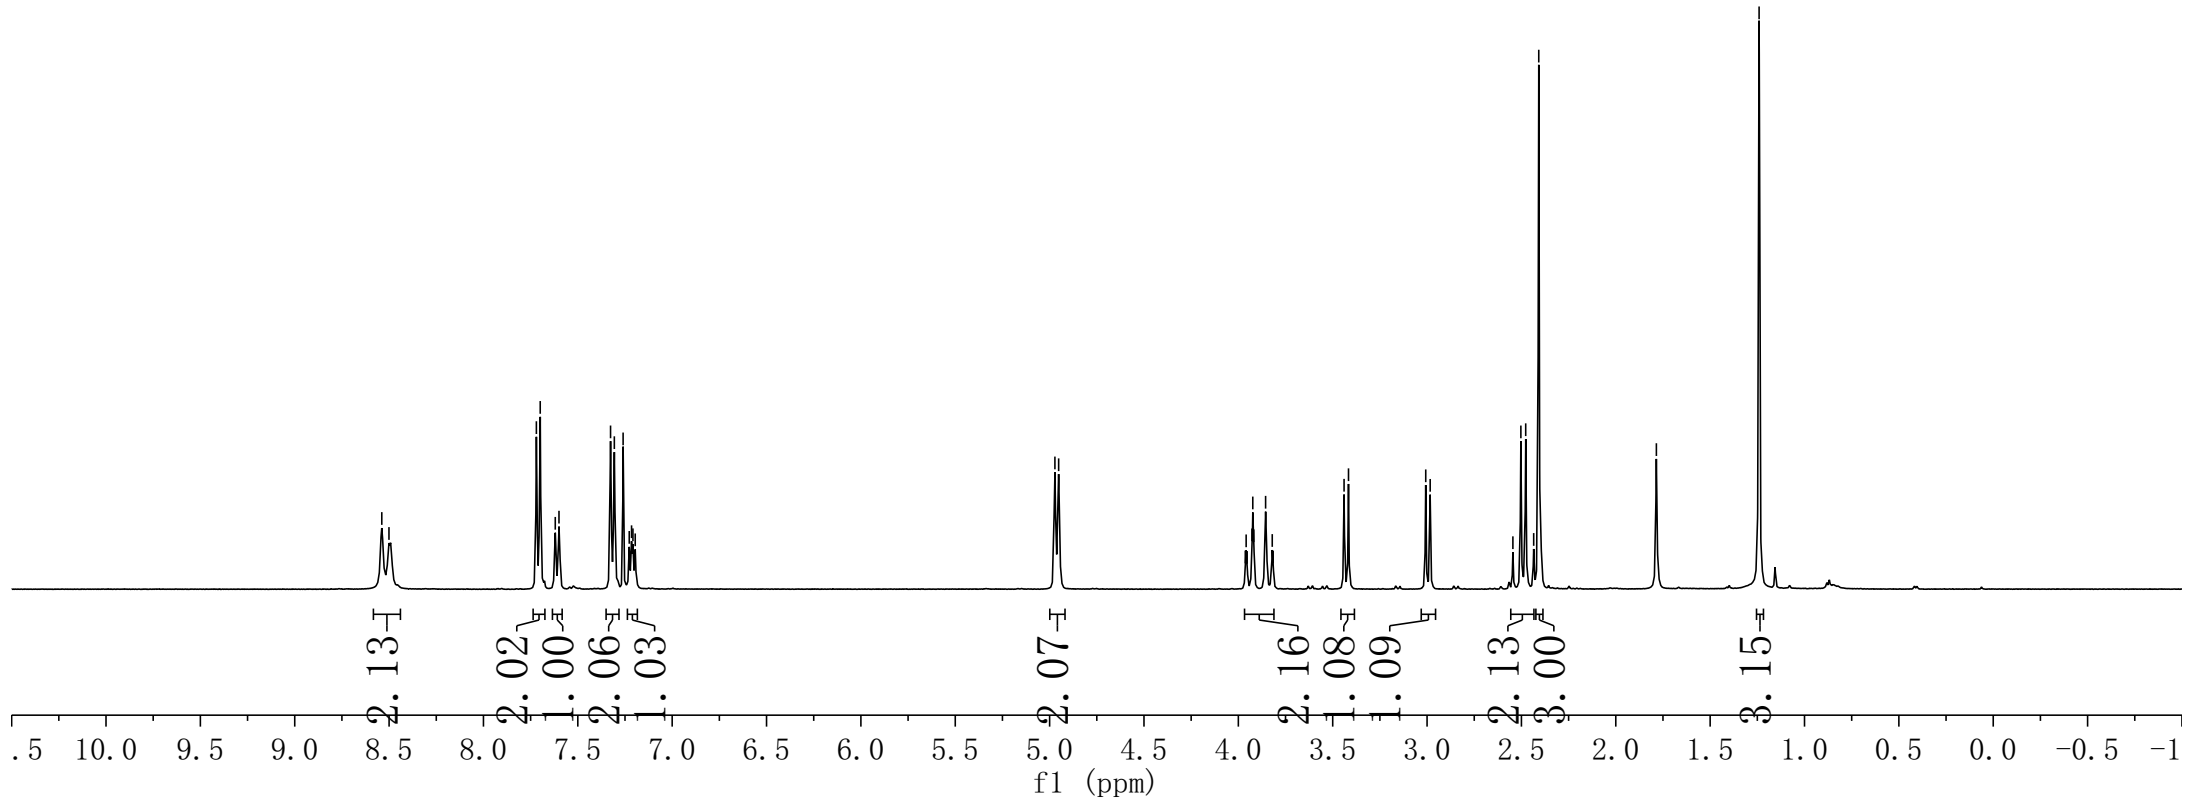

152.247  
150.380  
148.247  
143.785  
138.459  
132.205  
129.666  
127.837  
122.899  
120.422

-106.713

-90.063  
79.360  
77.318  
77.000  
76.683

58.645  
52.189  
45.188

-30.051  
23.347  
-21.551

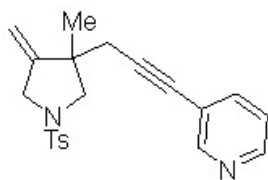

3o <sup>13</sup>C NMR (100 MHz, CDCl<sub>3</sub>)

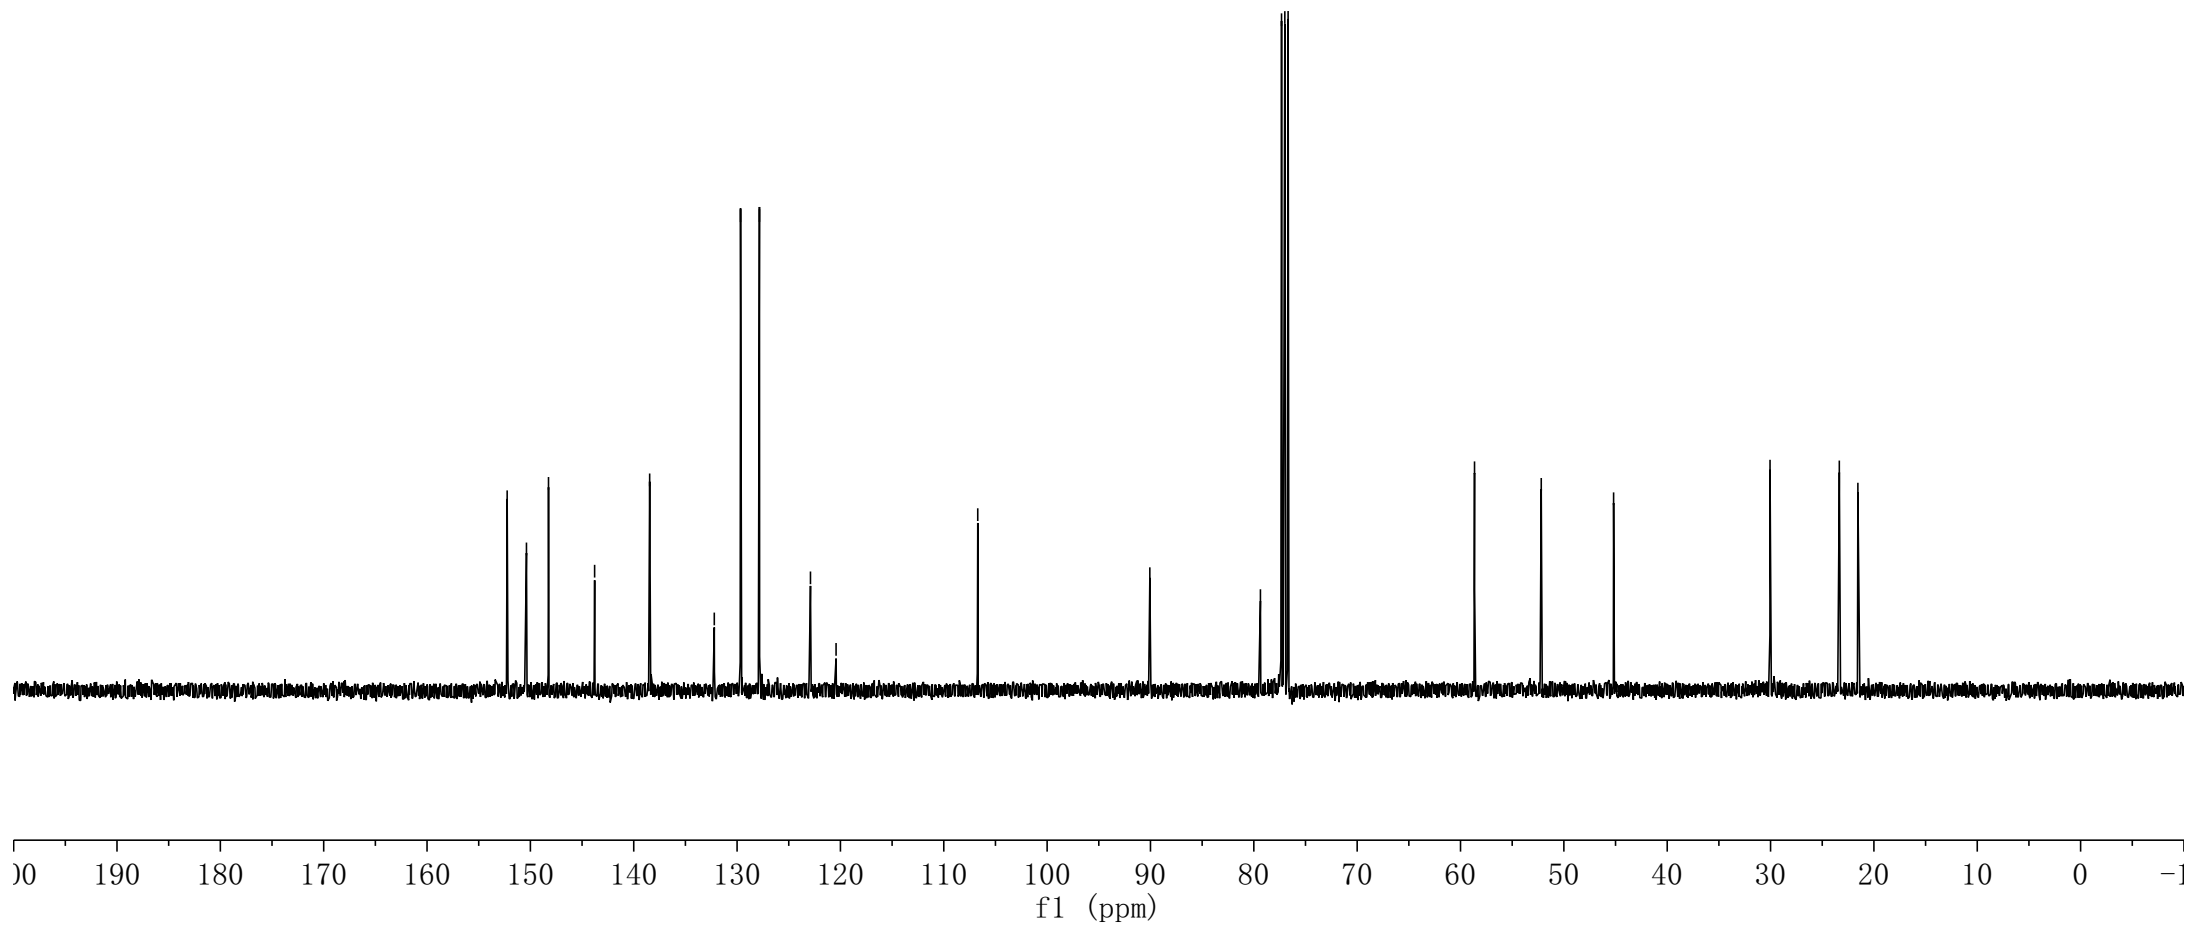

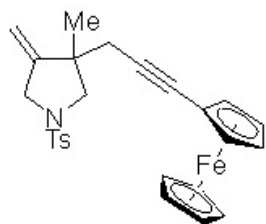

3p  $^1\text{H}$  NMR (400 MHz,  $\text{CDCl}_3$ )

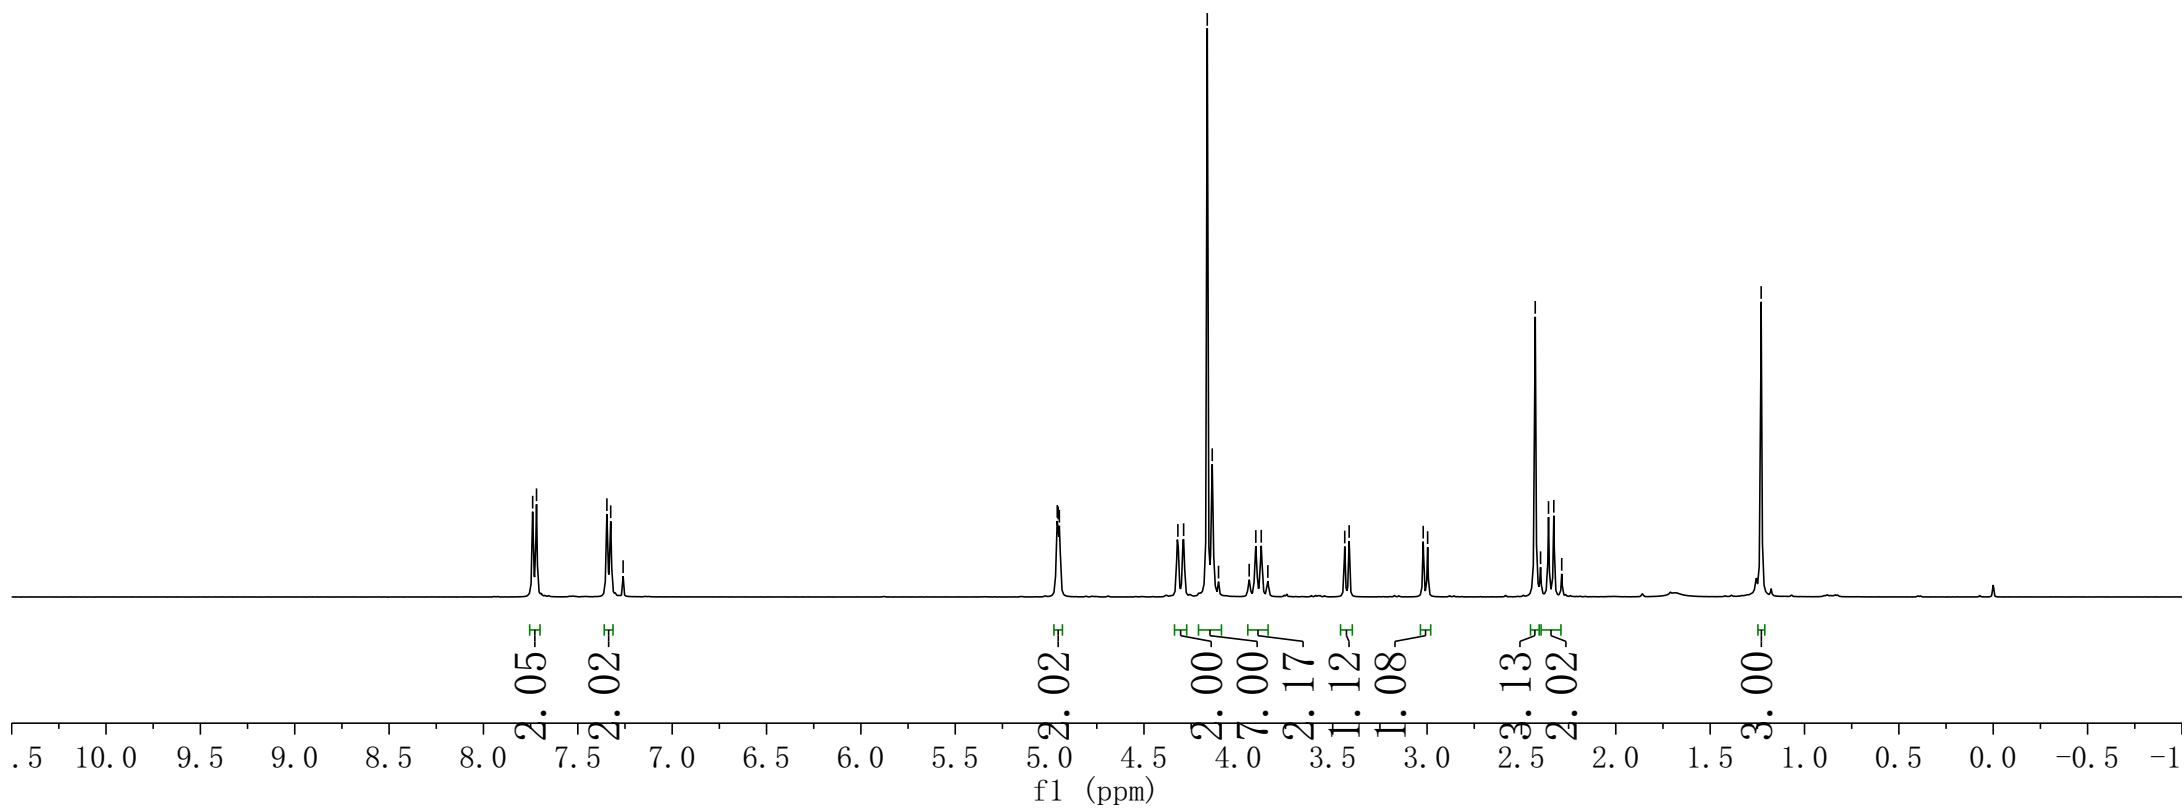

7.739  
7.719  
7.346  
7.326  
7.260

4.960  
4.955  
4.948  
4.320  
4.290  
4.165  
4.138  
4.105  
3.943  
3.907  
3.879  
3.844  
3.436  
3.413  
3.020  
2.997  
2.427  
2.399  
2.357  
2.328  
2.287  
-1.230

-150.710  
-143.630  
132.483  
129.668  
127.804  
  
-106.353  
  
82.341  
80.482  
77.318  
77.000  
76.682  
71.153  
69.662  
68.226  
65.624  
58.672  
52.227  
45.191  
  
-30.122  
23.478  
-21.537

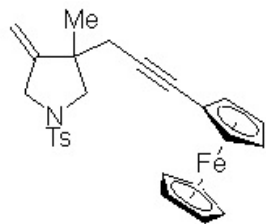

3p  $^{13}\text{C}$  NMR (100 MHz,  $\text{CDCl}_3$ )

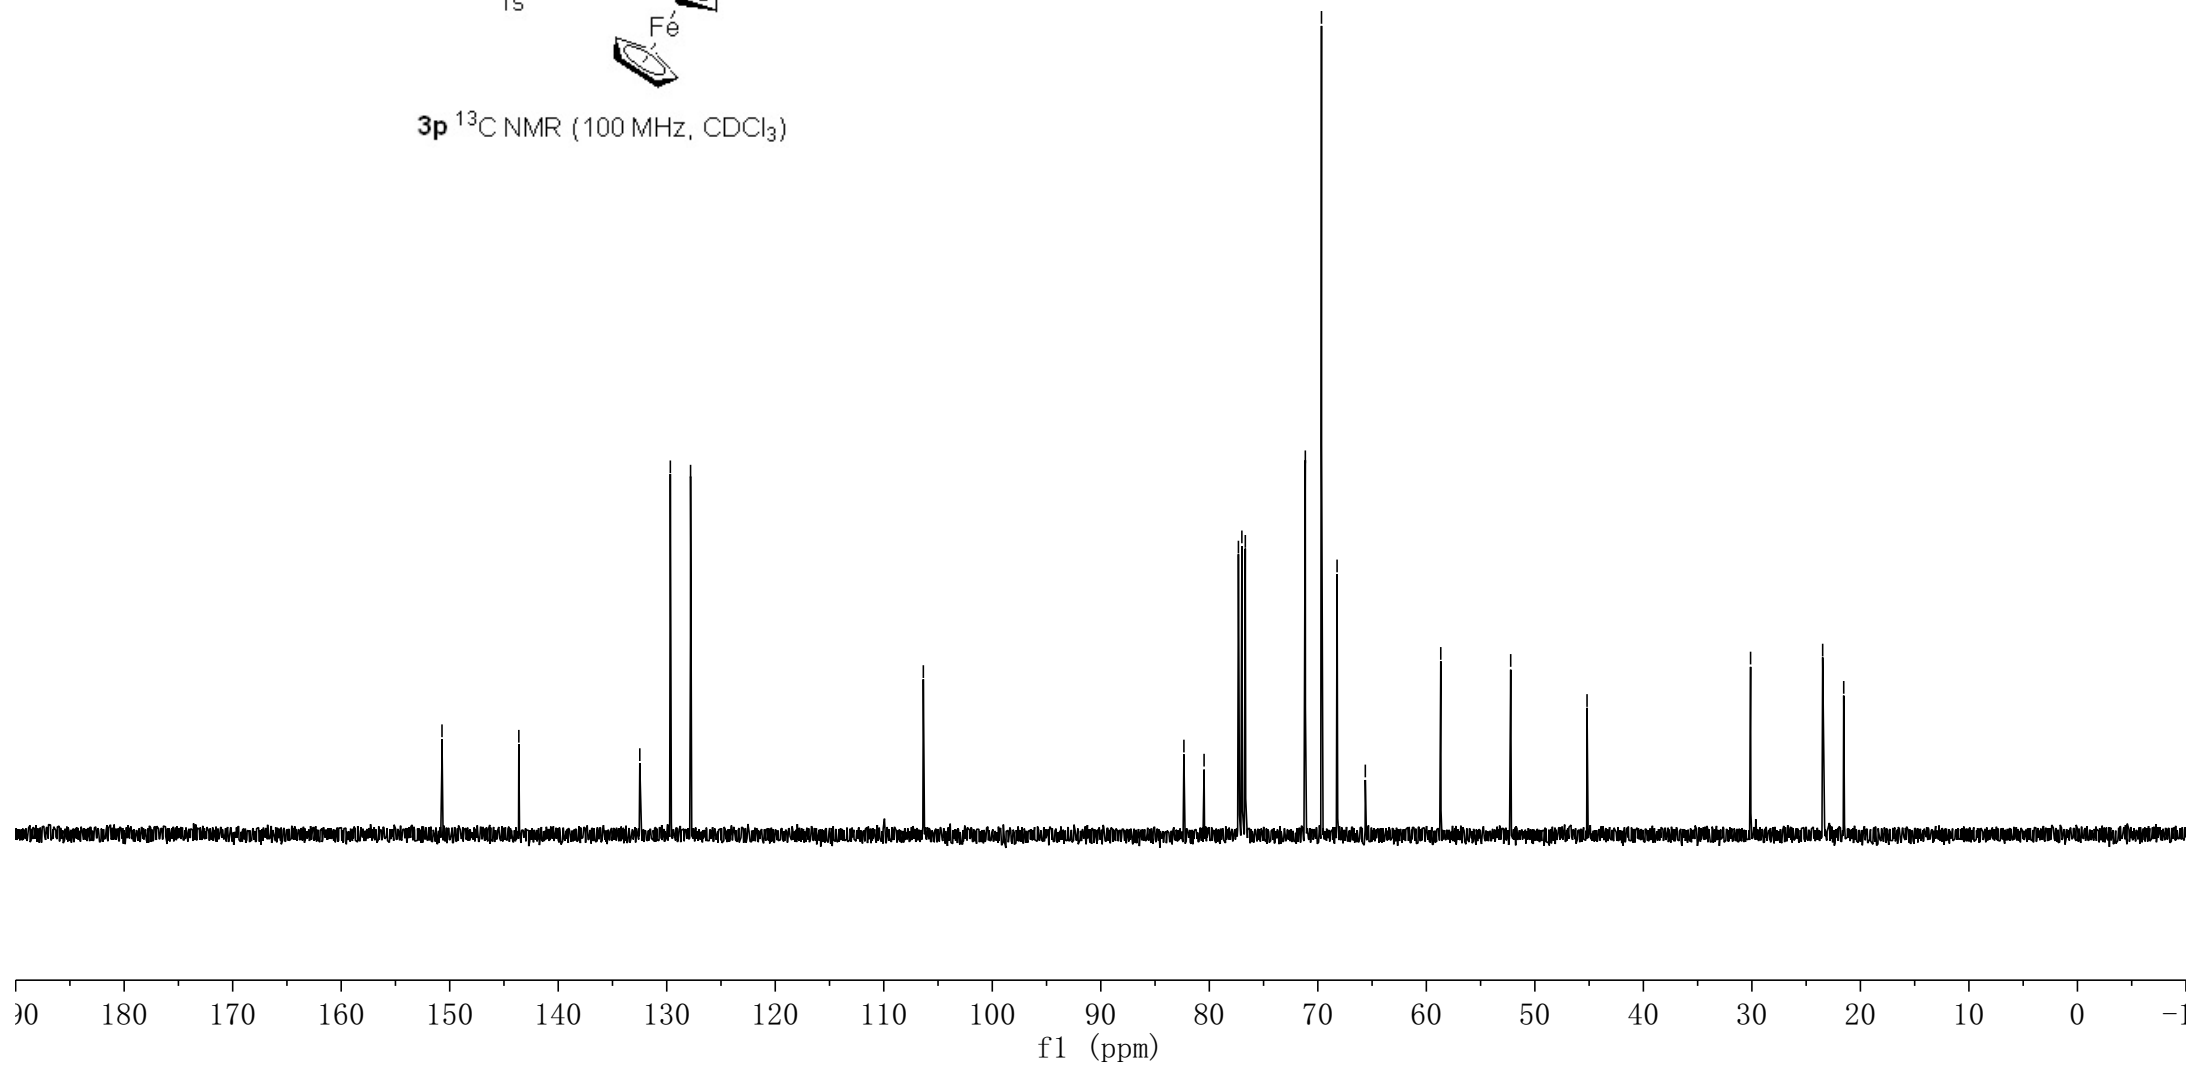

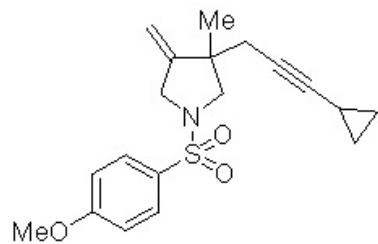

**3q**  $^1\text{H}$  NMR (400 MHz,  $\text{CDCl}_3$ )

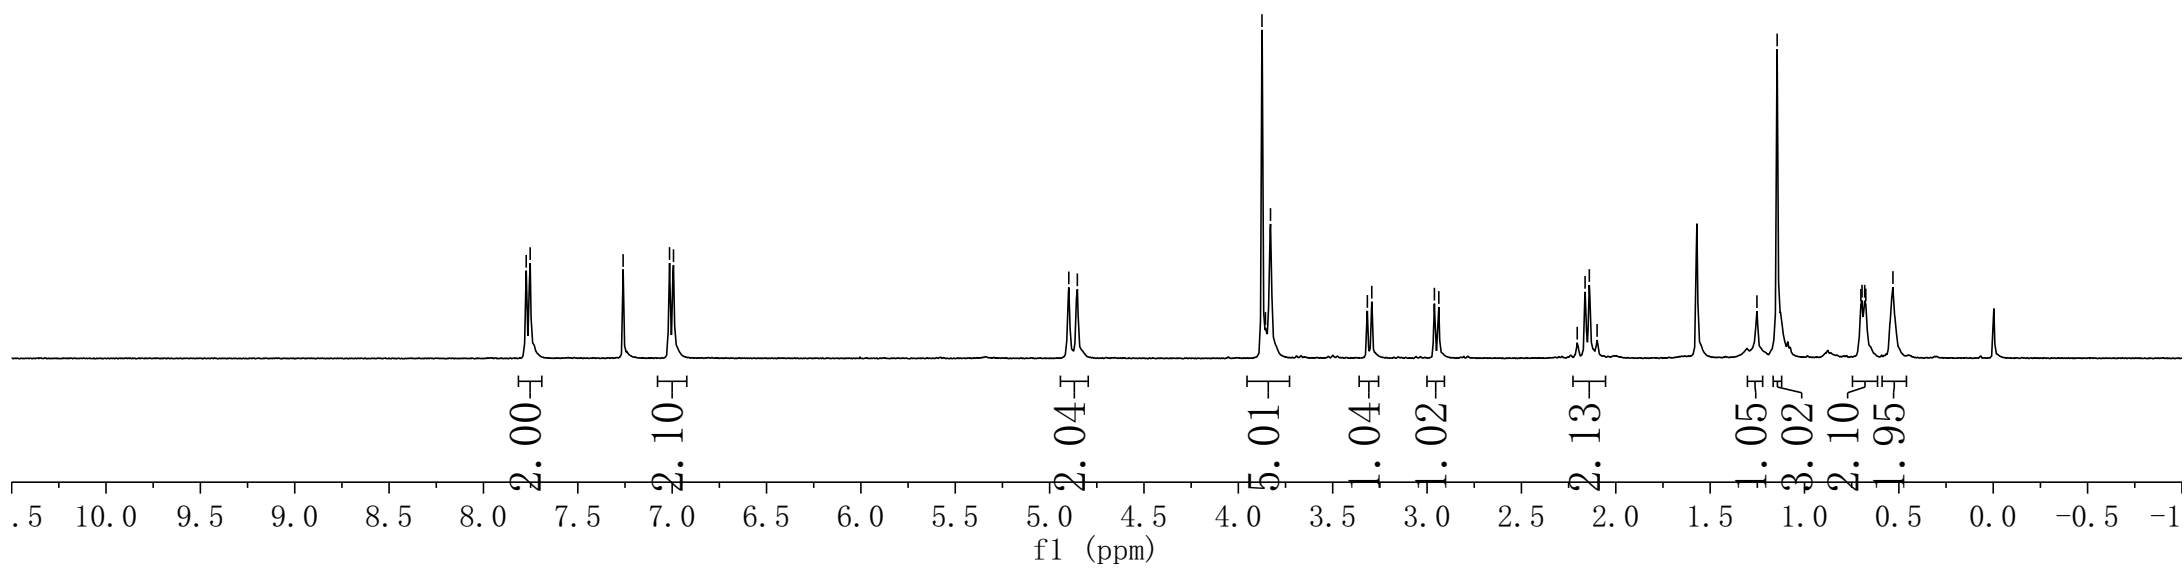

7.773  
7.752  
7.260  
7.014  
6.993

4.898  
4.853

3.875  
3.856  
3.830  
3.316  
3.293  
2.961  
2.938  
2.204  
2.163  
2.140  
2.099  
1.252  
1.145  
0.701  
0.695  
0.681  
0.675  
0.531



-163.024

-150.947

-129.907

-127.251

-114.161

-106.097

85.567

77.318

77.000

76.682

71.697

58.640

55.571

52.286

45.186

-29.449

-23.417

8.043

8.000

-0.579

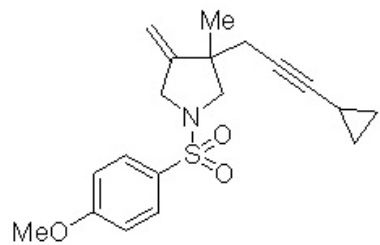

**3q**  $^{13}\text{C}$  NMR (100 MHz,  $\text{CDCl}_3$ )

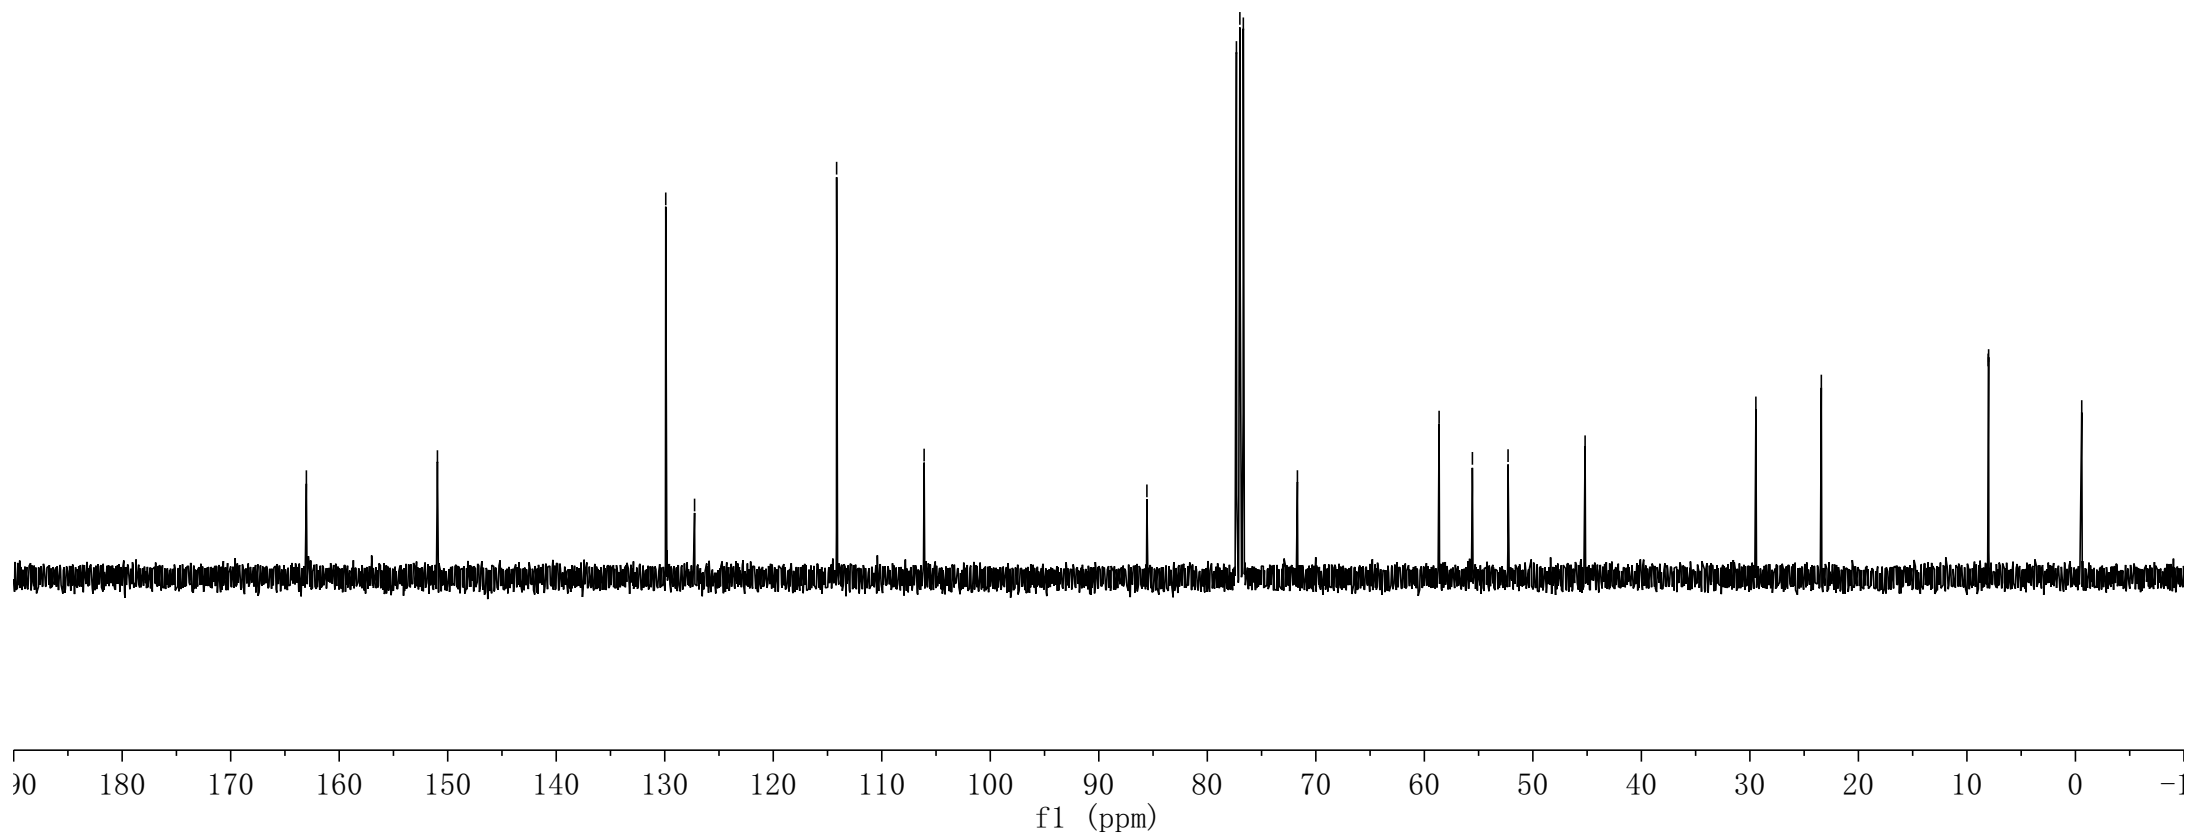

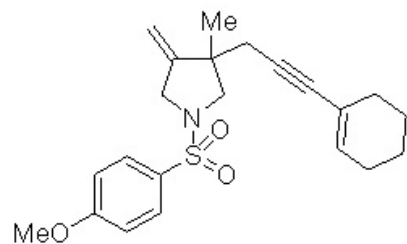

**3r** <sup>1</sup>H NMR (400 MHz, CDCl<sub>3</sub>)

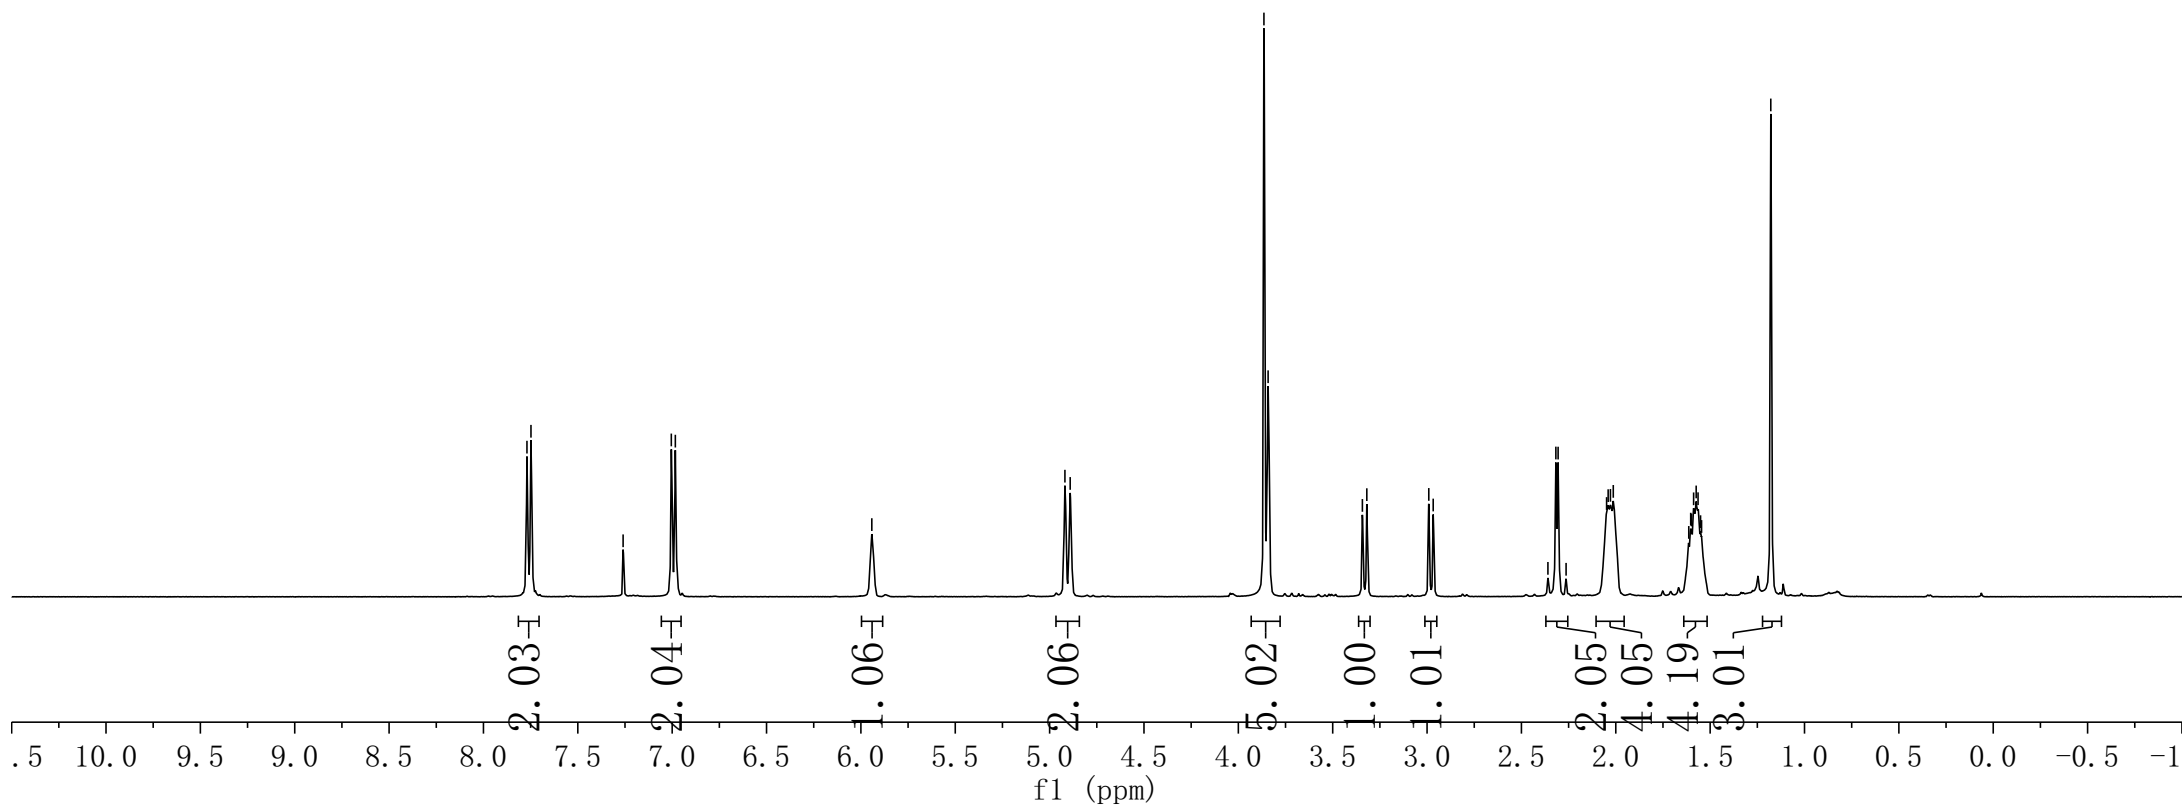

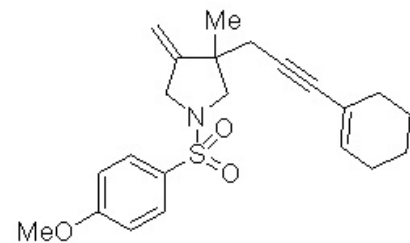

**3r**  $^{13}\text{C}$  NMR (100 MHz,  $\text{CDCl}_3$ )

-163.008  
 -150.804  
 133.739  
 129.919  
 127.202  
 120.567  
 114.143  
 106.250

84.401  
 83.372  
 77.318  
 77.000  
 76.682

58.673  
 55.542  
 52.286  
 45.249

29.882  
 29.401  
 25.471  
 23.514  
 22.264  
 21.483

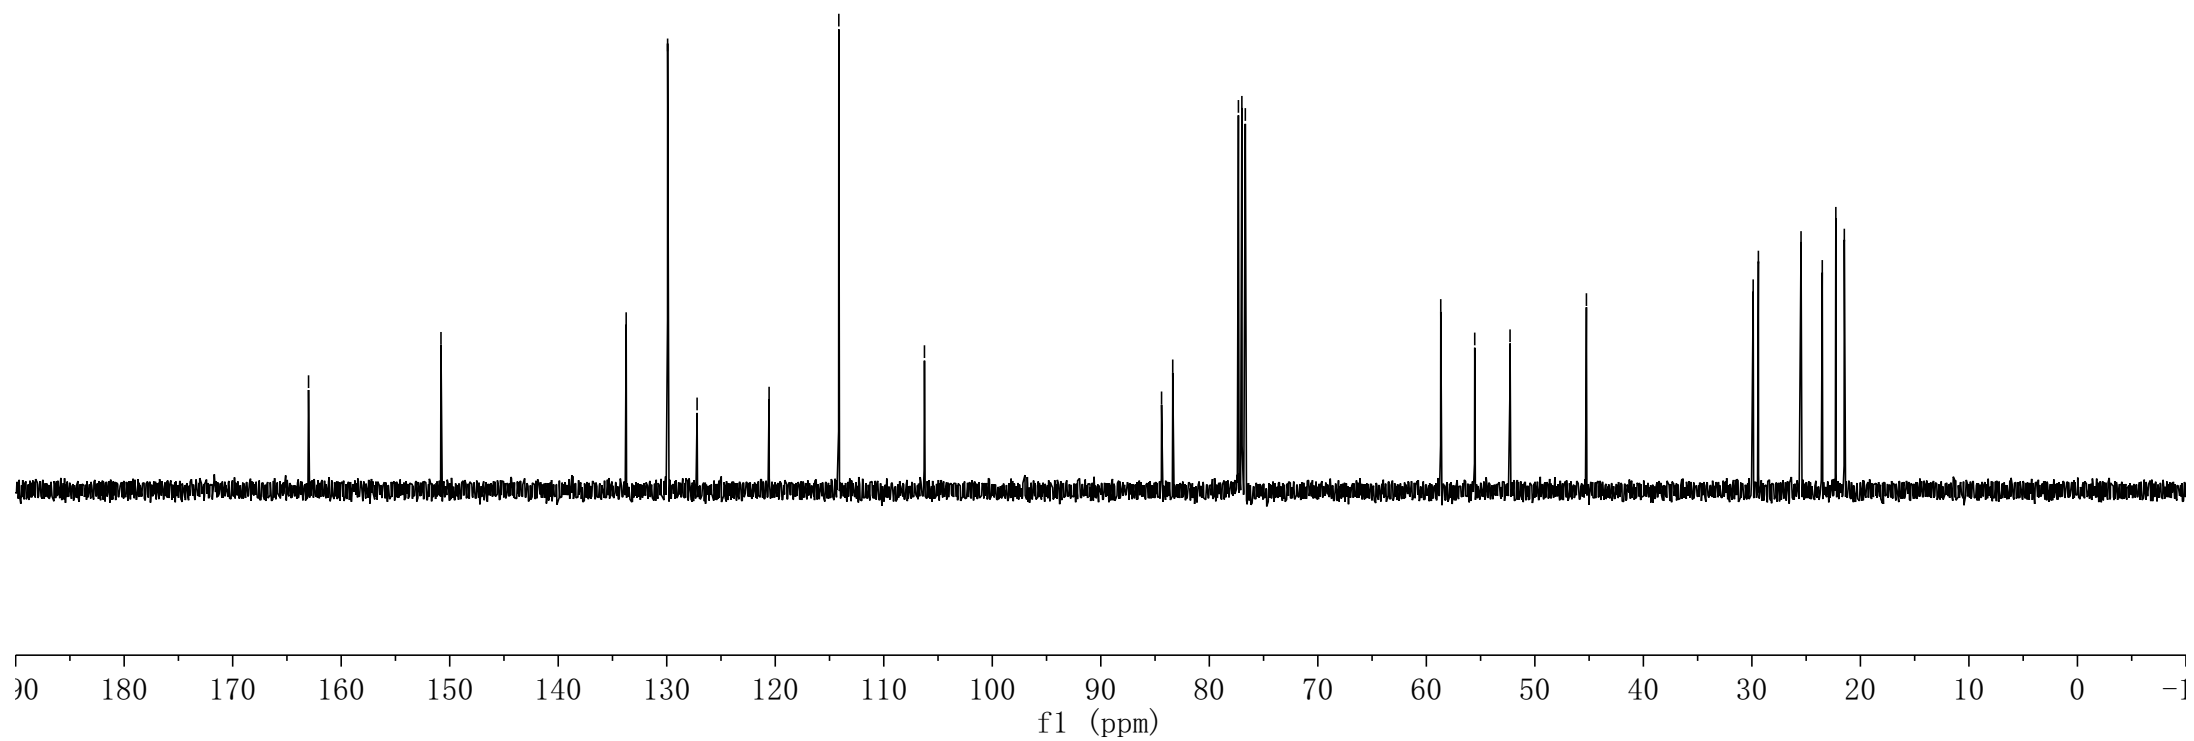

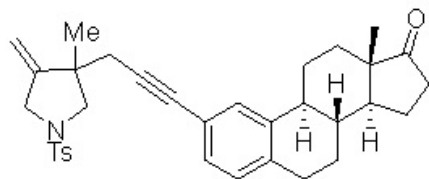

**3s**  $^1\text{H}$  NMR (400 MHz,  $\text{CDCl}_3$ )

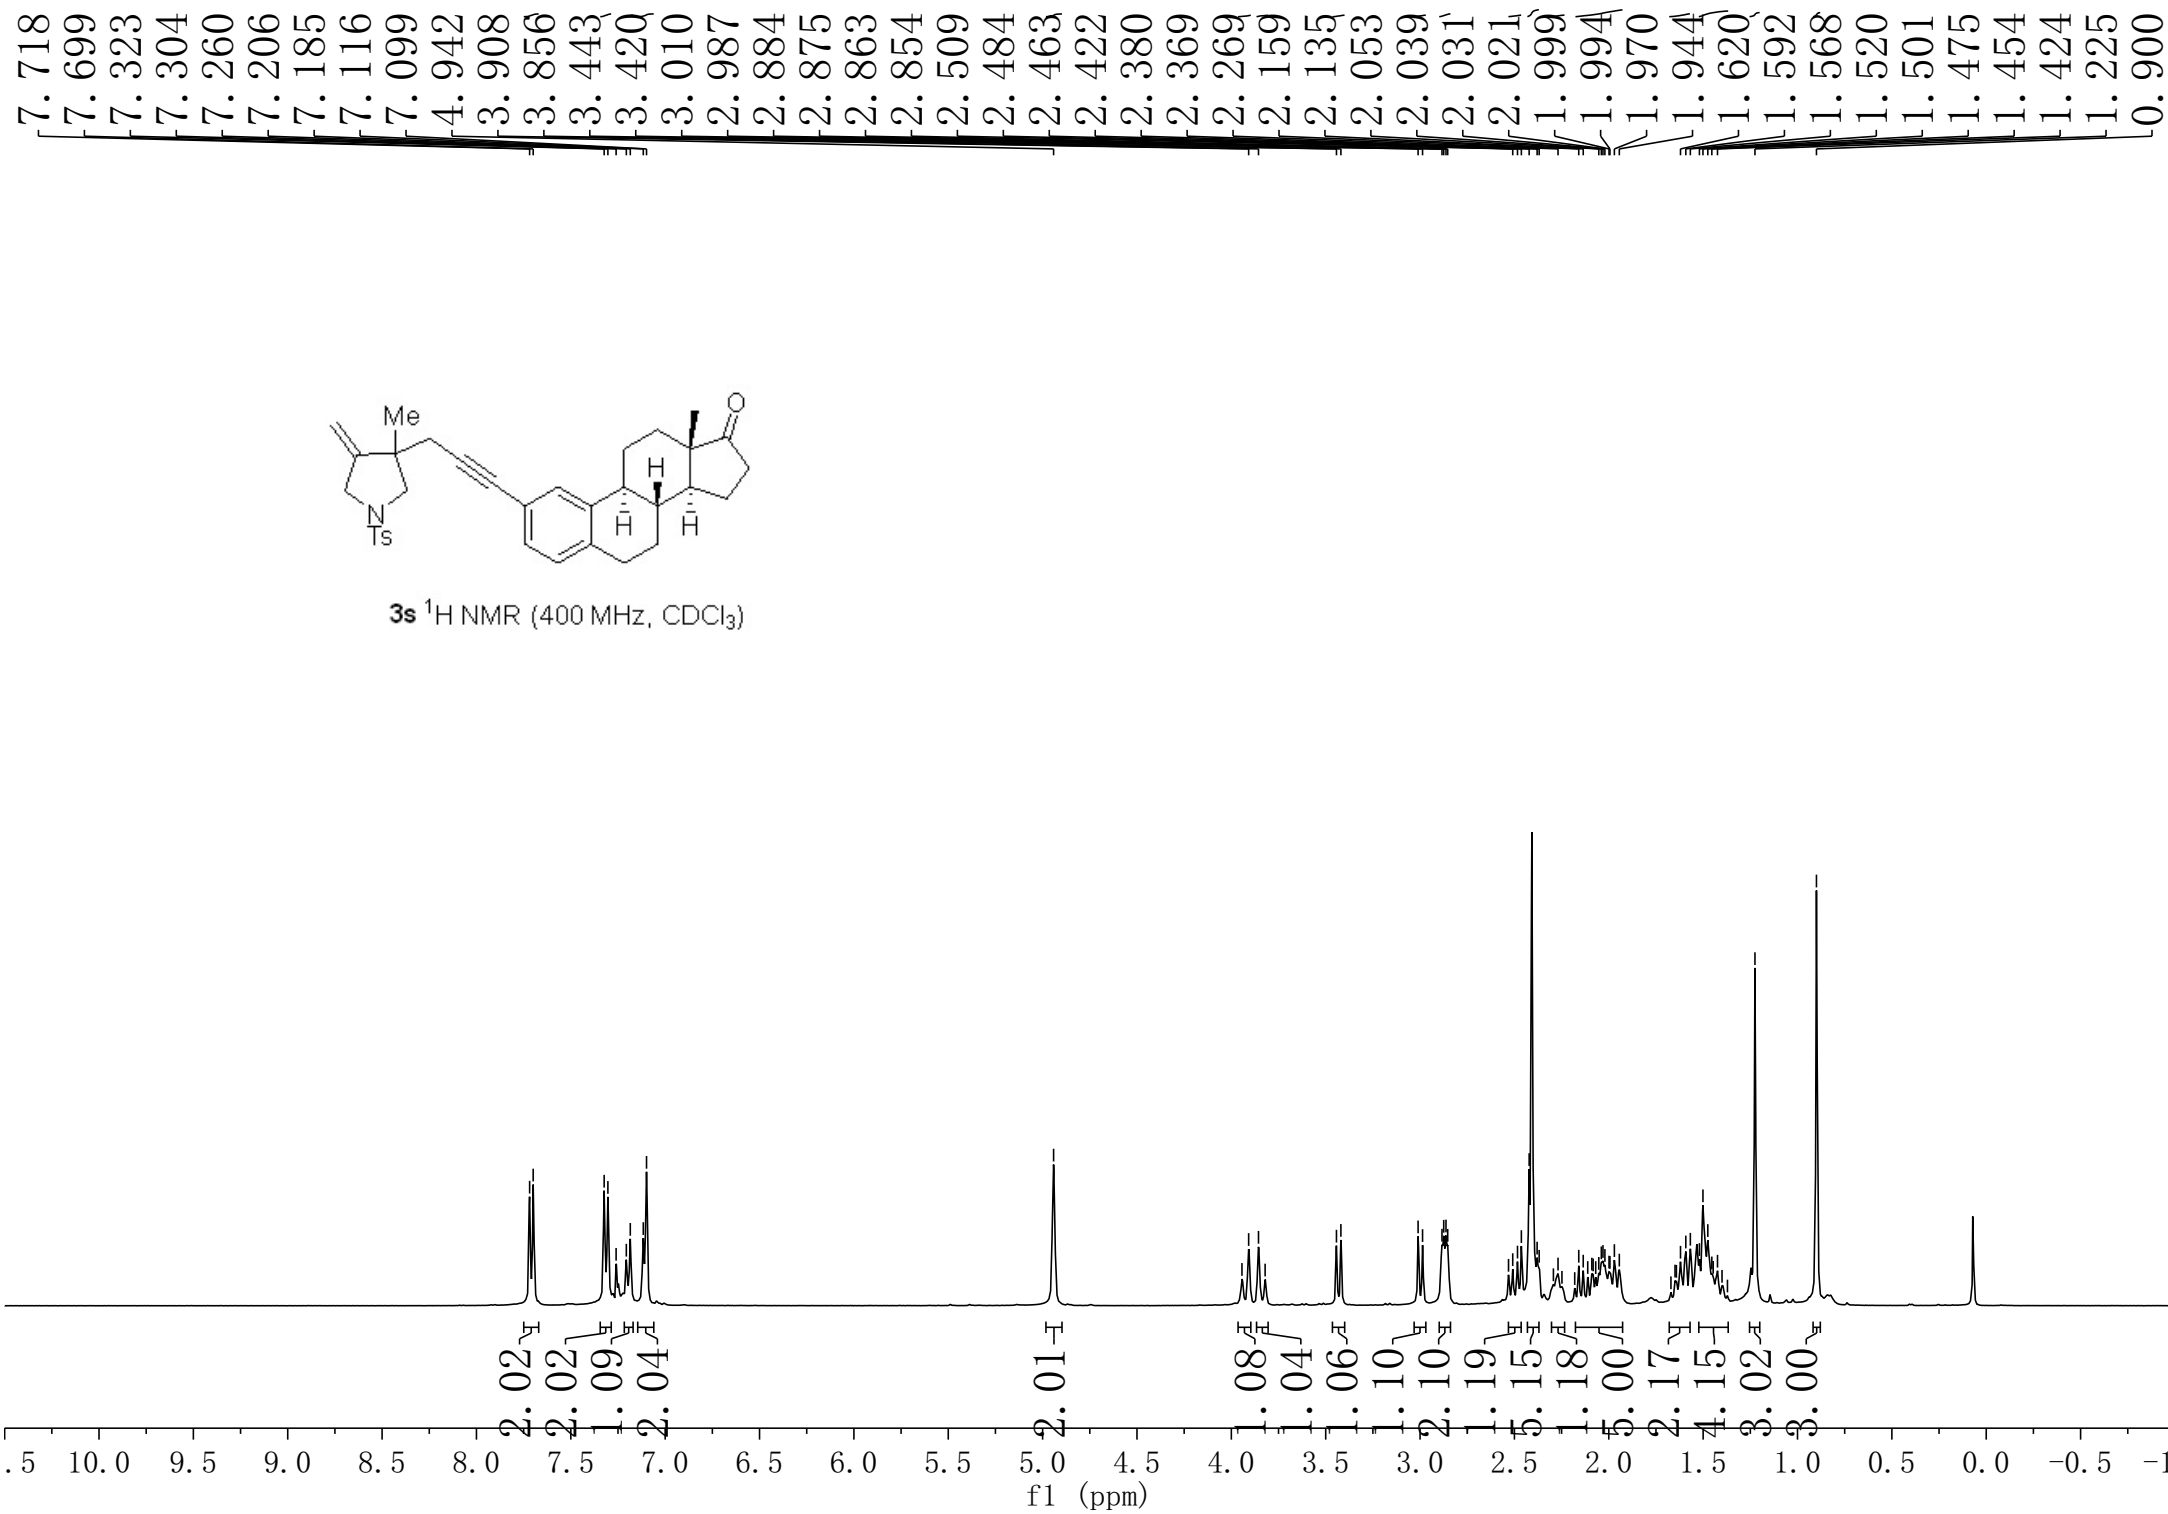

-220.637

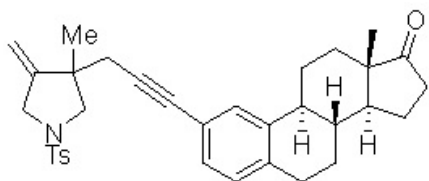

**3s**  $^{13}\text{C}$  NMR (100 MHz,  $\text{CDCl}_3$ )

150.585  
143.558  
139.698  
136.397  
132.416  
131.921  
129.586  
128.796  
127.737  
125.167  
120.604  
-106.426

85.590  
82.482  
77.319  
77.000  
76.682  
58.665  
52.139  
50.344  
47.825  
45.233  
44.283  
37.870  
35.740  
31.434  
29.976  
28.996  
26.230  
25.501  
23.199  
21.472  
13.732  
0.932

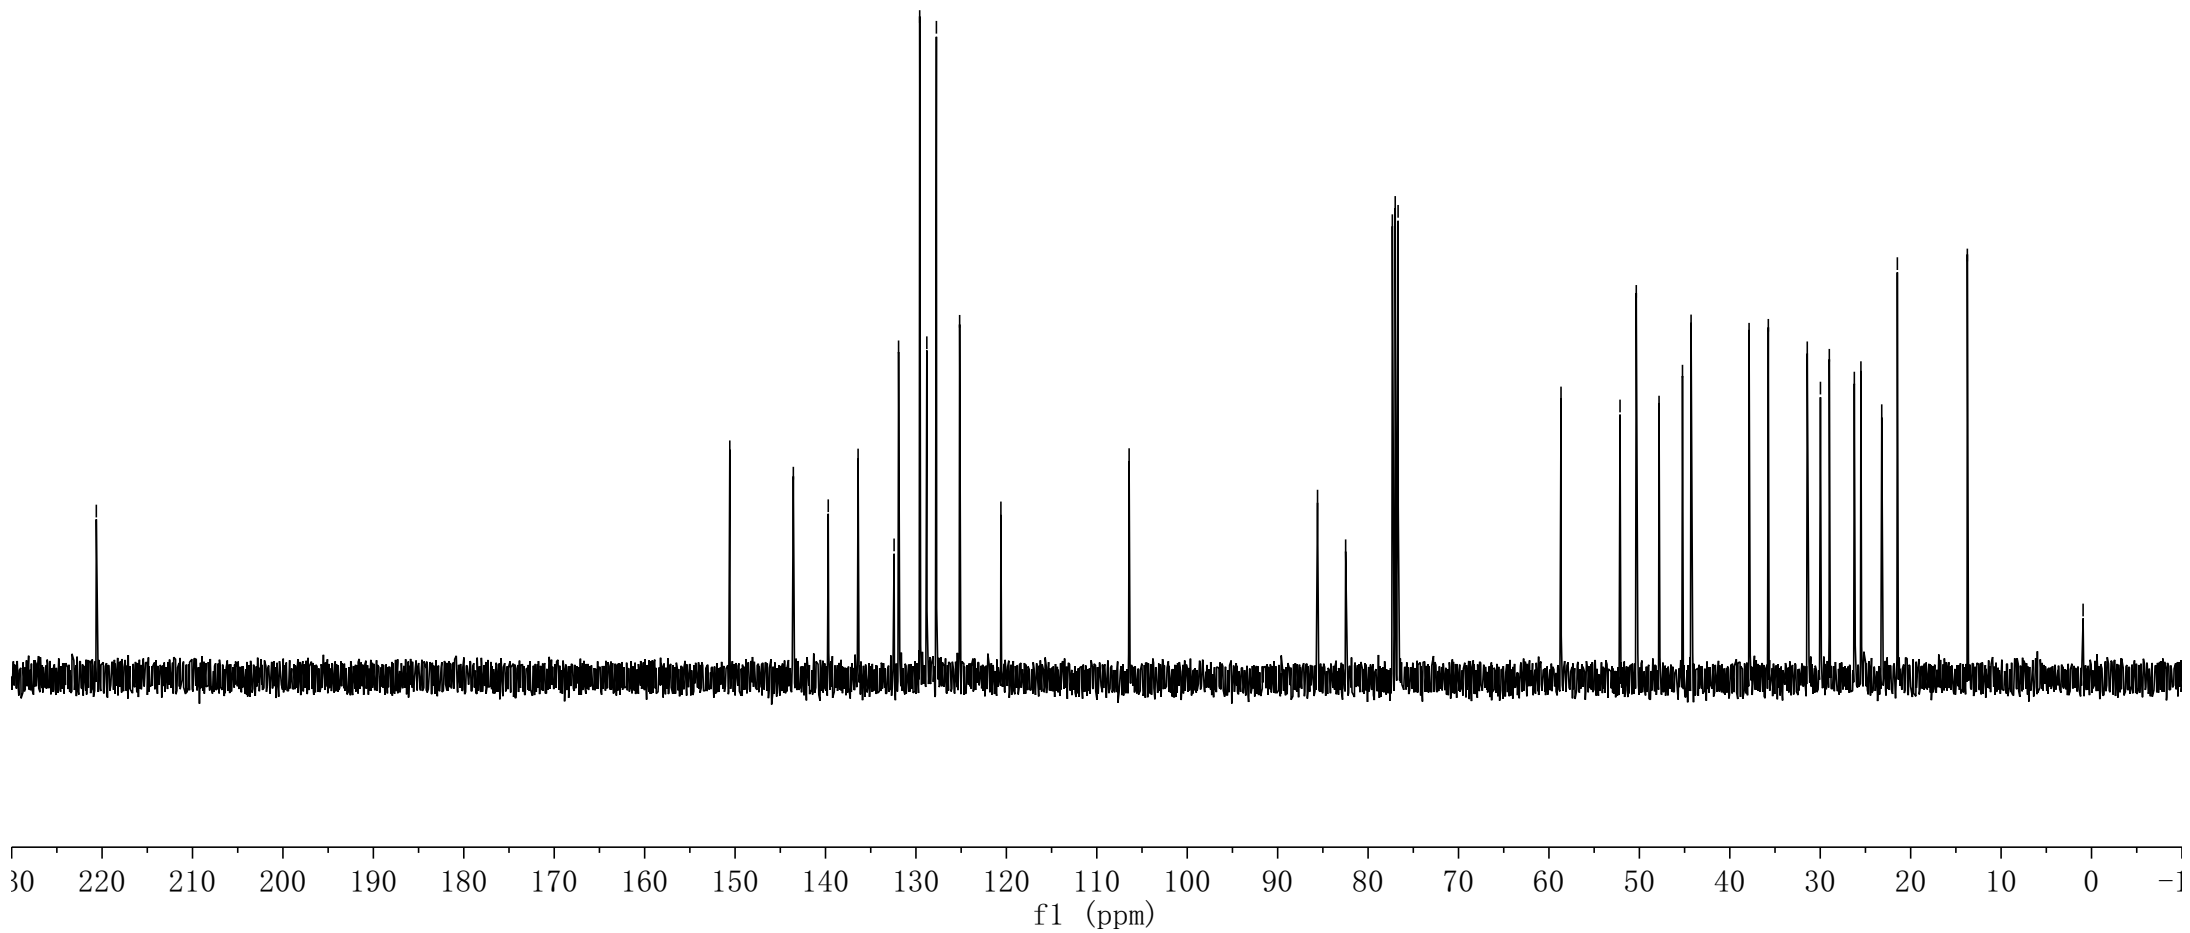

7.955  
7.935  
7.723  
7.703  
7.361  
7.341  
7.321  
7.302  
7.260  
4.971  
4.953  
4.922  
4.914  
4.896  
4.887  
3.947  
3.912  
3.869  
3.834  
3.445  
3.421  
3.026  
3.002  
2.495  
2.473  
2.432  
2.401  
2.128  
2.098  
1.950  
1.933  
1.920  
1.737  
1.709  
1.572  
1.545  
1.518  
1.245  
1.139  
1.108  
1.079  
1.050  
0.927  
0.916  
0.904  
0.794  
0.777

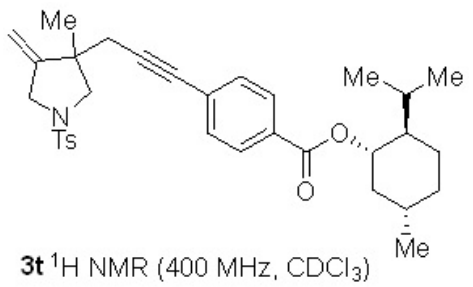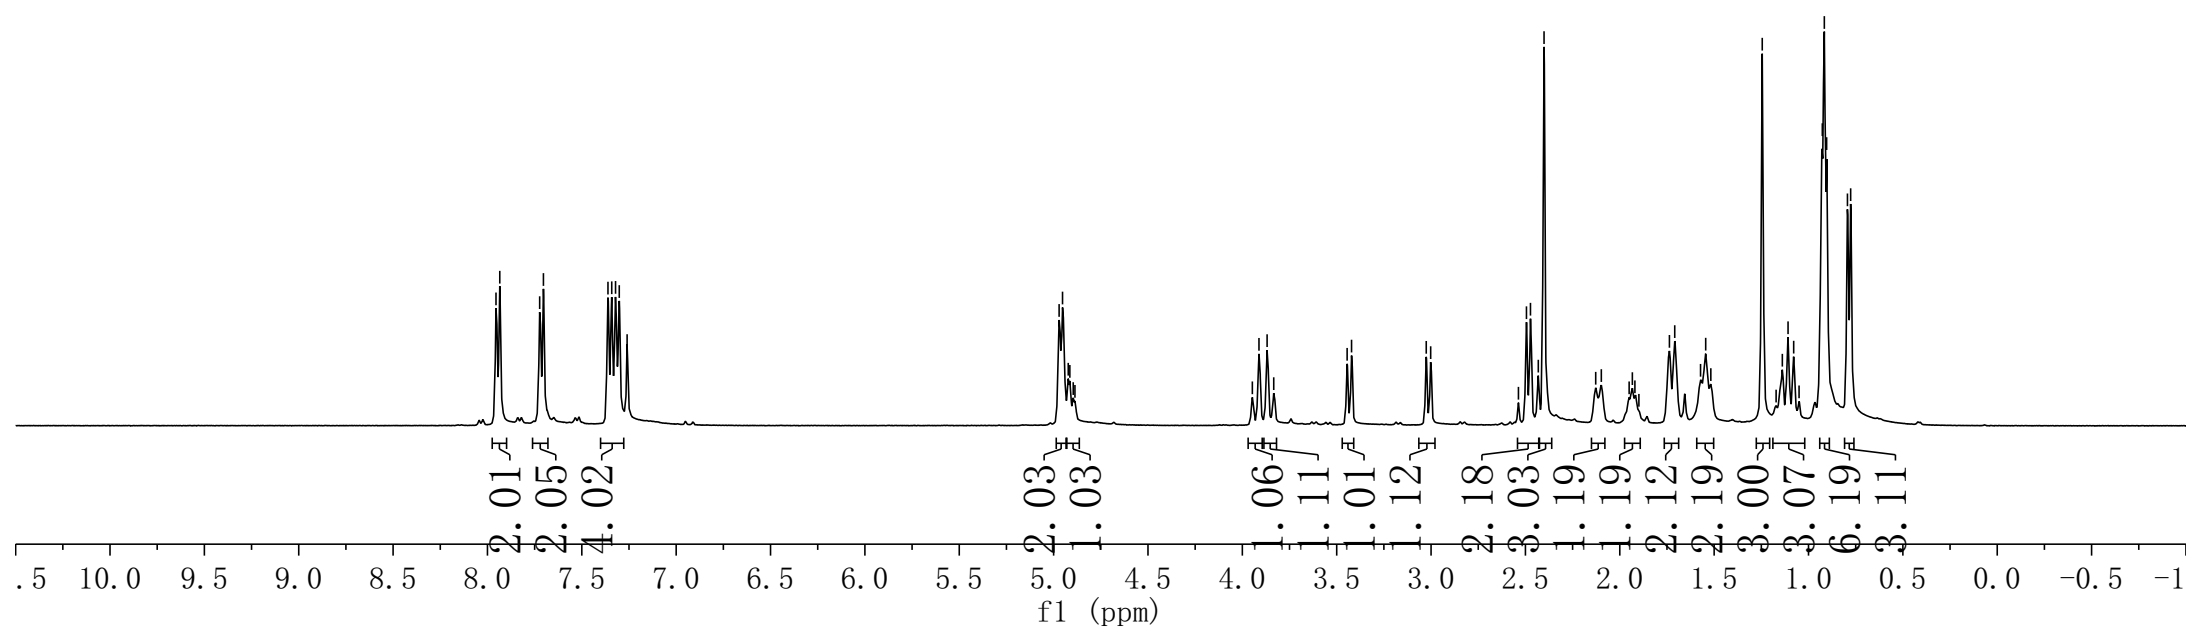

-165.485

-150.465

-143.681

-132.342

-131.369

-129.846

-129.644

-129.317

-127.832

-106.631

89.633

82.125

77.318

77.000

76.682

74.986

58.657

52.221

47.193

45.252

40.893

34.239

31.395

30.088

26.480

23.589

23.485

22.005

21.509

20.716

16.493

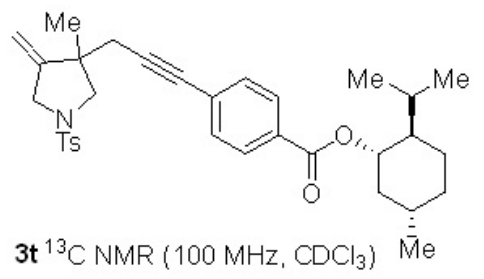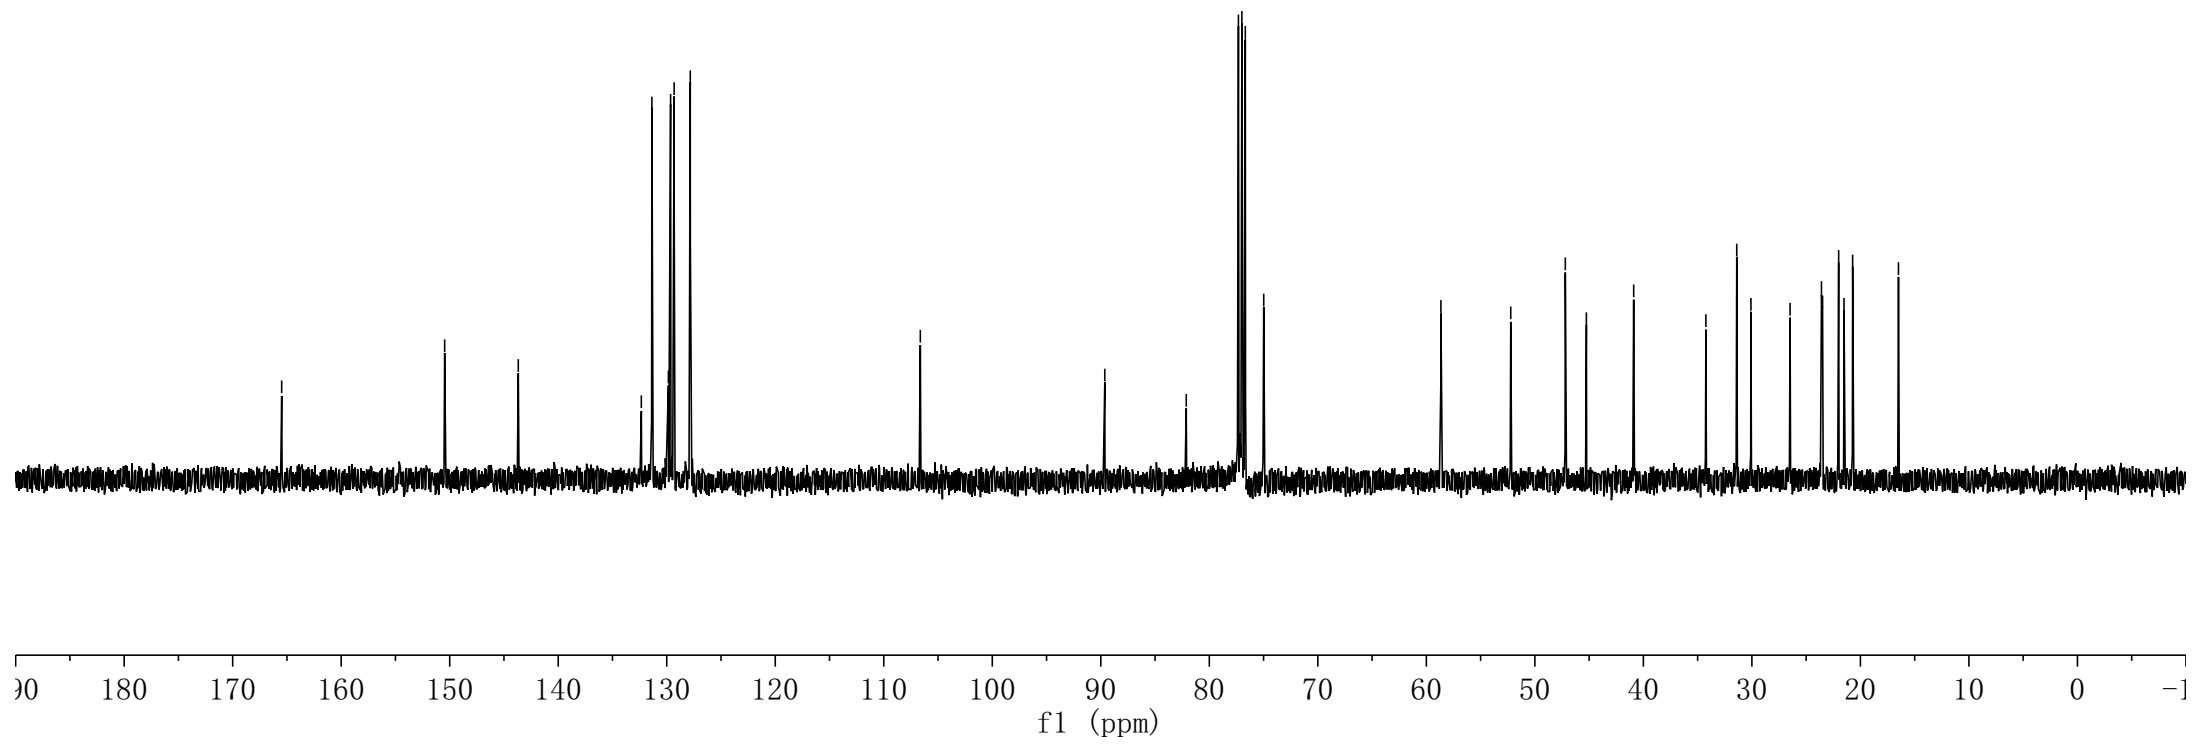

7.770  
7.749  
7.523  
7.507  
7.488  
7.461  
7.444  
7.424  
7.182  
7.165  
6.739  
6.717

4.874  
3.884  
3.849  
3.824  
3.789  
3.718  
3.398  
3.375  
2.980  
2.957  
2.372  
2.322  
2.280

-1.152

--0.000

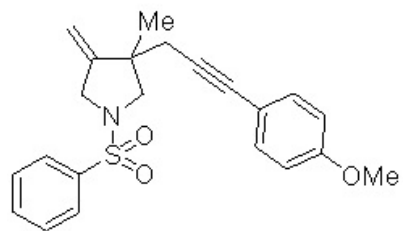

**4a**  $^1\text{H}$  NMR (400 MHz,  $\text{CDCl}_3$ )

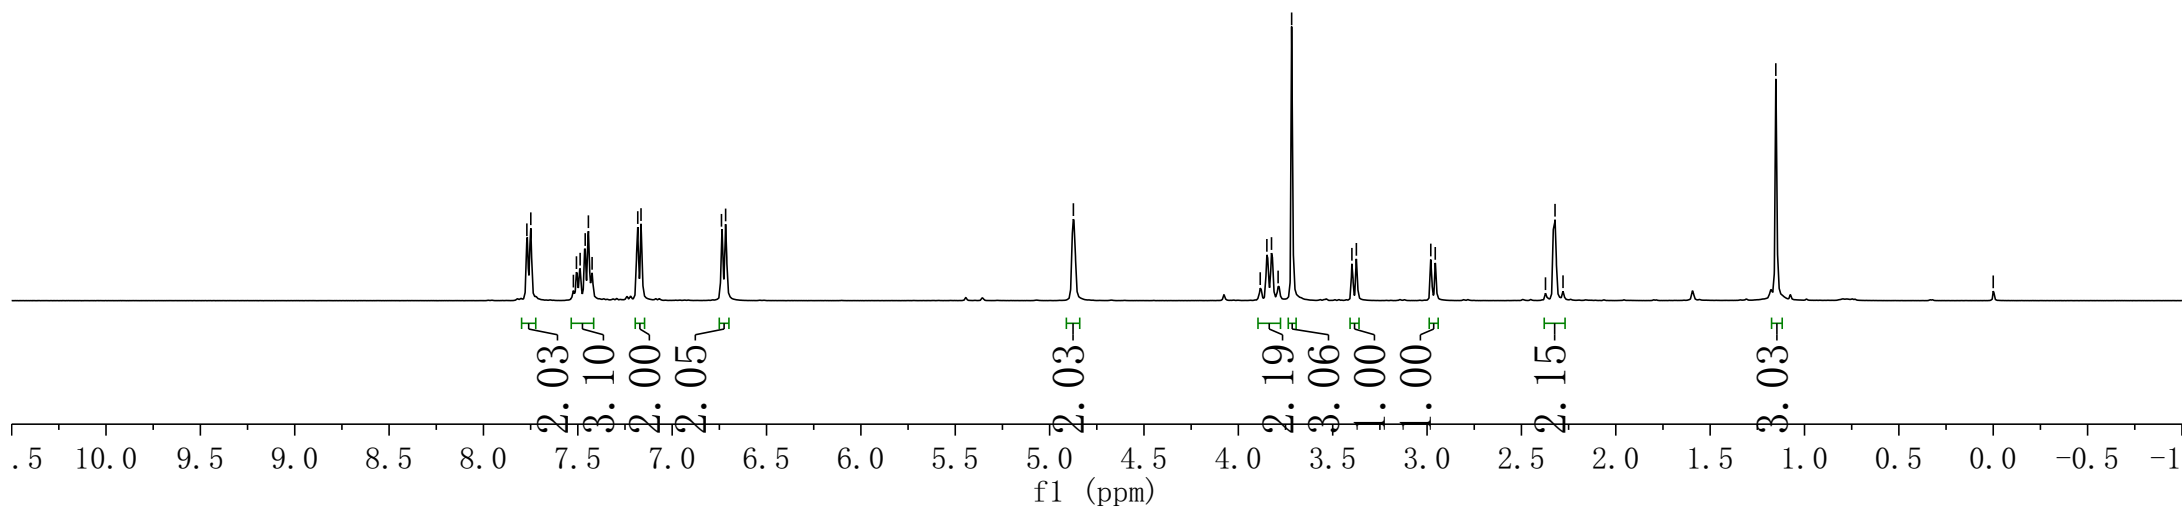



-159.154  
 -150.469  
 135.441  
 132.815  
 132.789  
 128.974  
 127.637  
 -115.352  
 113.724  
 -106.483  
 84.636  
 82.331  
 77.319  
 77.000  
 76.682  
 -58.629  
 -55.180  
 -52.172  
 -45.267  
 -29.907  
 -23.300

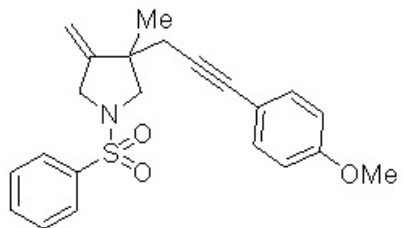

**4a**  $^{13}\text{C}$  NMR (100 MHz,  $\text{CDCl}_3$ )

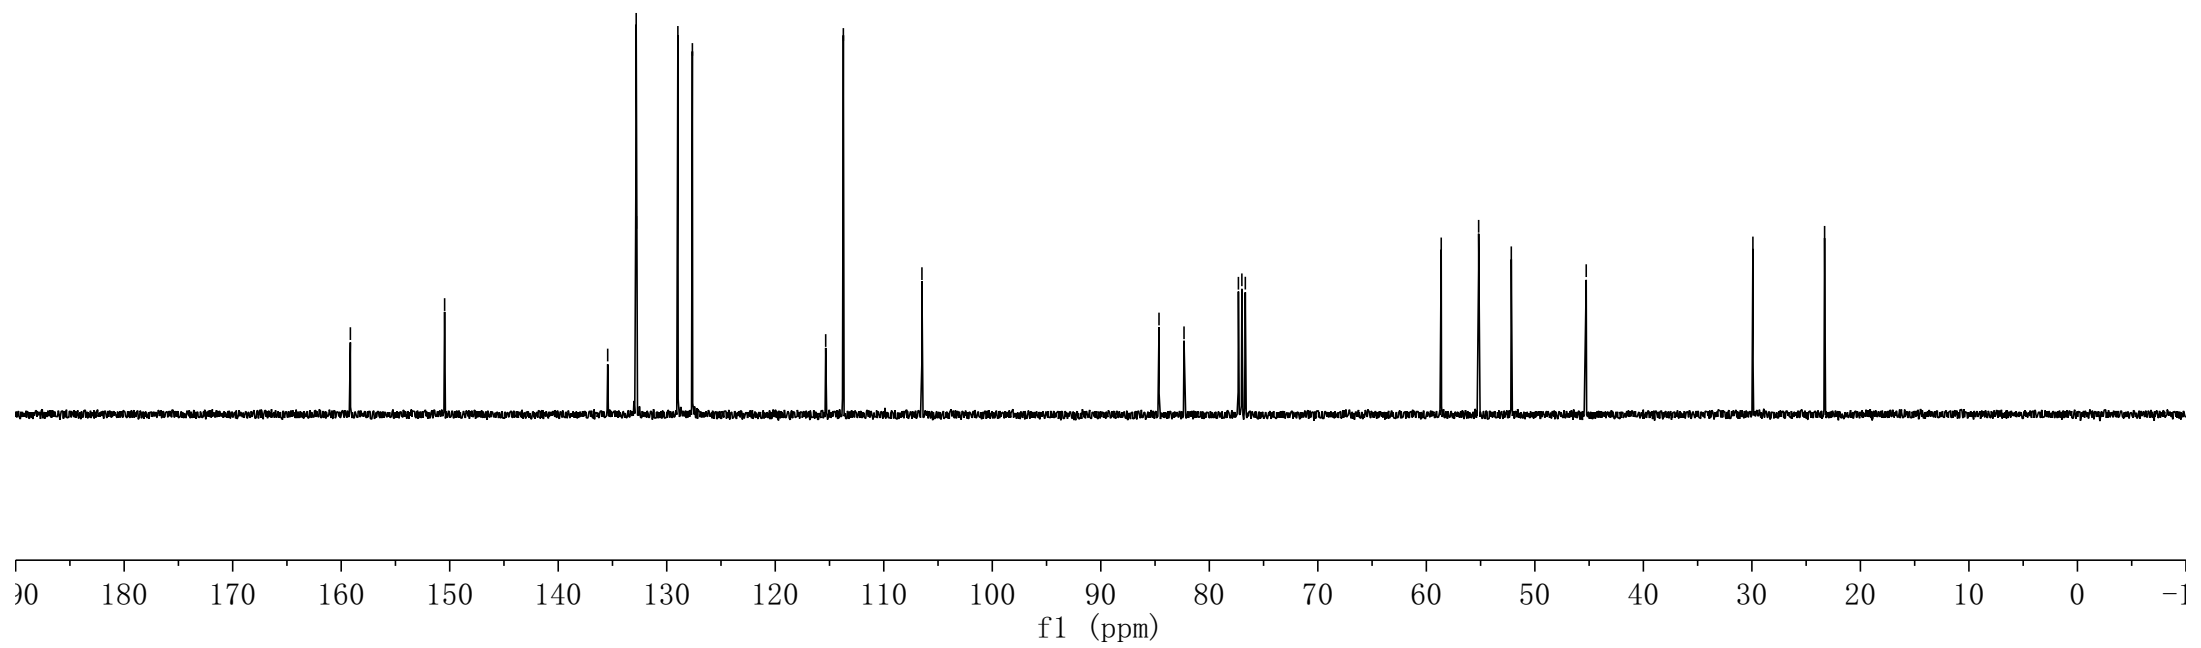

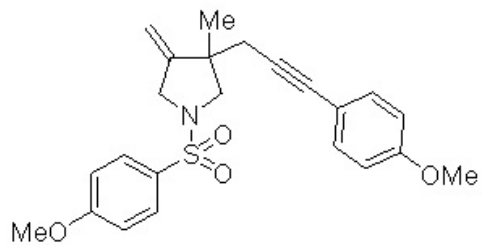

**4b**  $^1\text{H}$  NMR (400 MHz,  $\text{CDCl}_3$ )

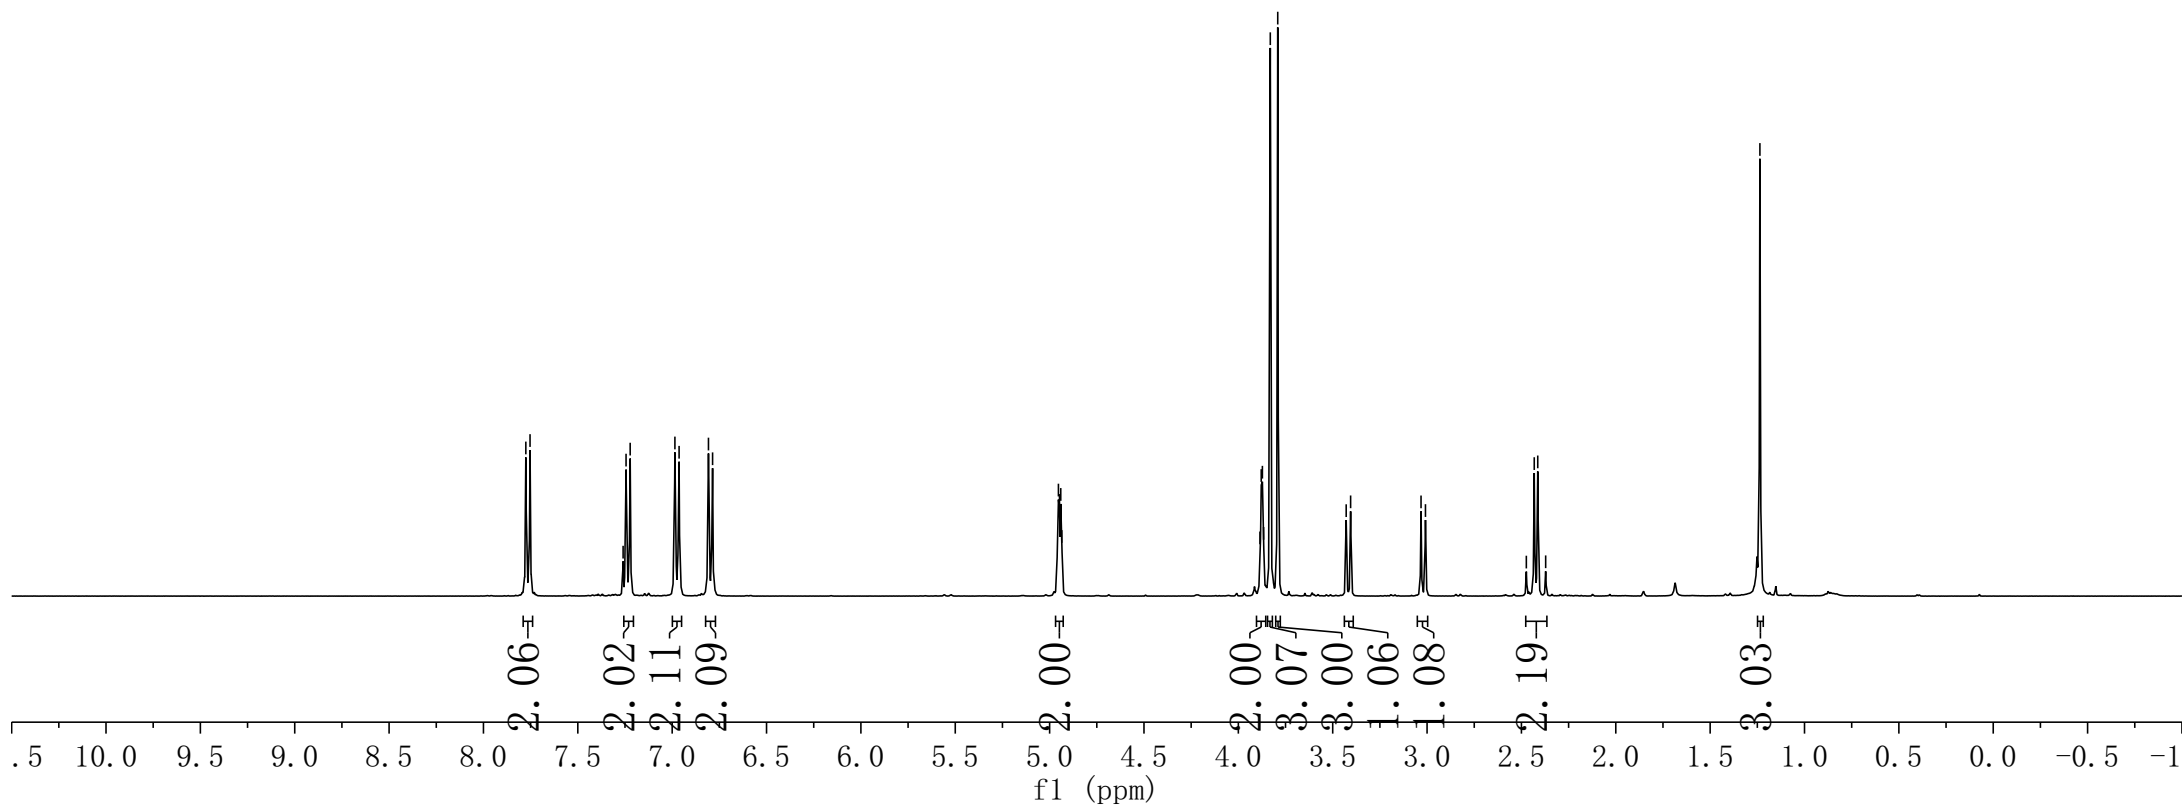

7.775  
7.753  
7.260  
7.244  
7.223  
6.986  
6.963  
6.808  
6.786

4.953  
4.948  
4.941  
4.936  
3.885  
3.879  
3.873  
3.866  
3.831  
3.791  
3.429  
3.405  
3.032  
3.008  
2.474  
2.432  
2.414  
2.372  
1.236

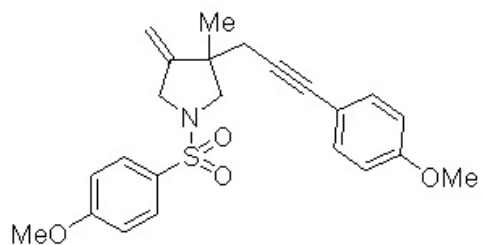

**4b**  $^{13}\text{C}$  NMR (100 MHz,  $\text{CDCl}_3$ )

162.945  
159.113  
150.653

132.760  
129.836  
126.878

115.350  
114.095  
113.699  
106.340

84.733  
82.261  
77.319  
77.000  
76.681

58.608  
55.453  
55.149  
52.269  
45.228

-29.943  
-23.556

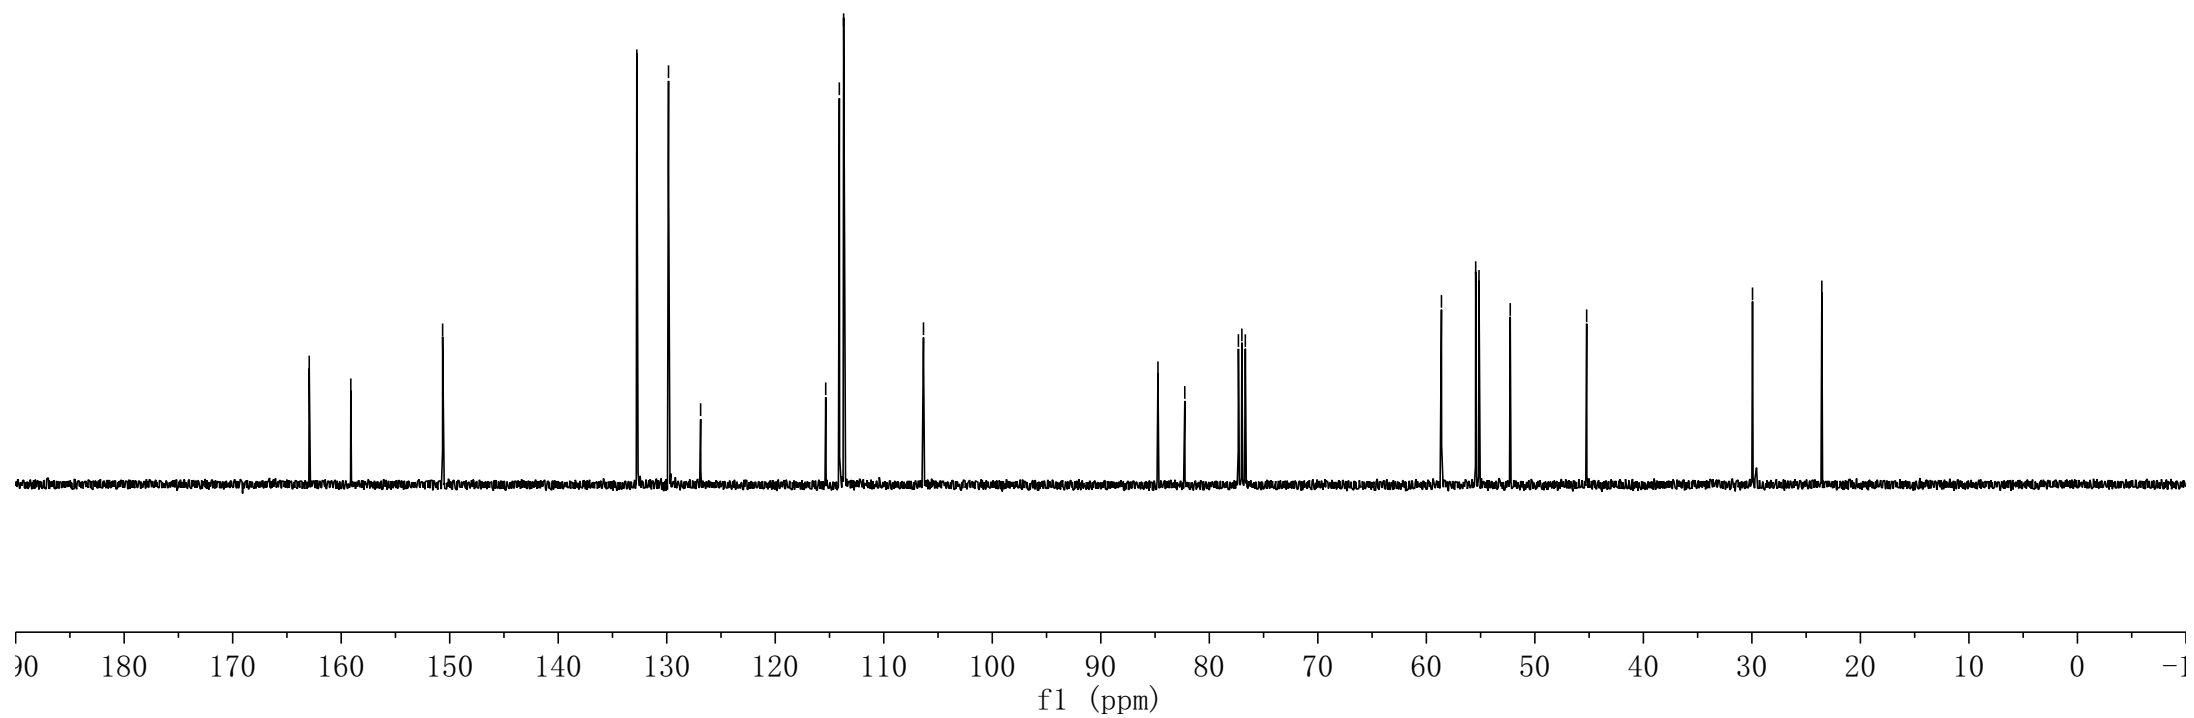

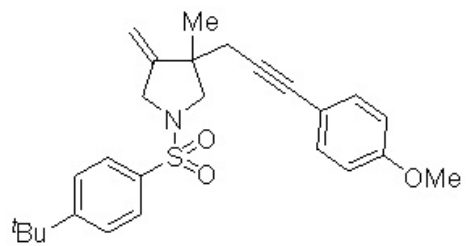

**4c**  $^1\text{H}$  NMR (400 MHz,  $\text{CDCl}_3$ )

7.766  
7.744  
7.535  
7.513  
7.301  
7.279  
7.260  
6.821  
6.799

4.962  
4.956  
4.950

3.985  
3.980  
3.974  
3.950  
3.945  
3.939  
3.899  
3.894  
3.889  
3.864  
3.859  
3.795  
3.473  
3.449  
3.052  
3.029  
2.465  
2.423  
2.412  
2.370  
1.328  
1.210

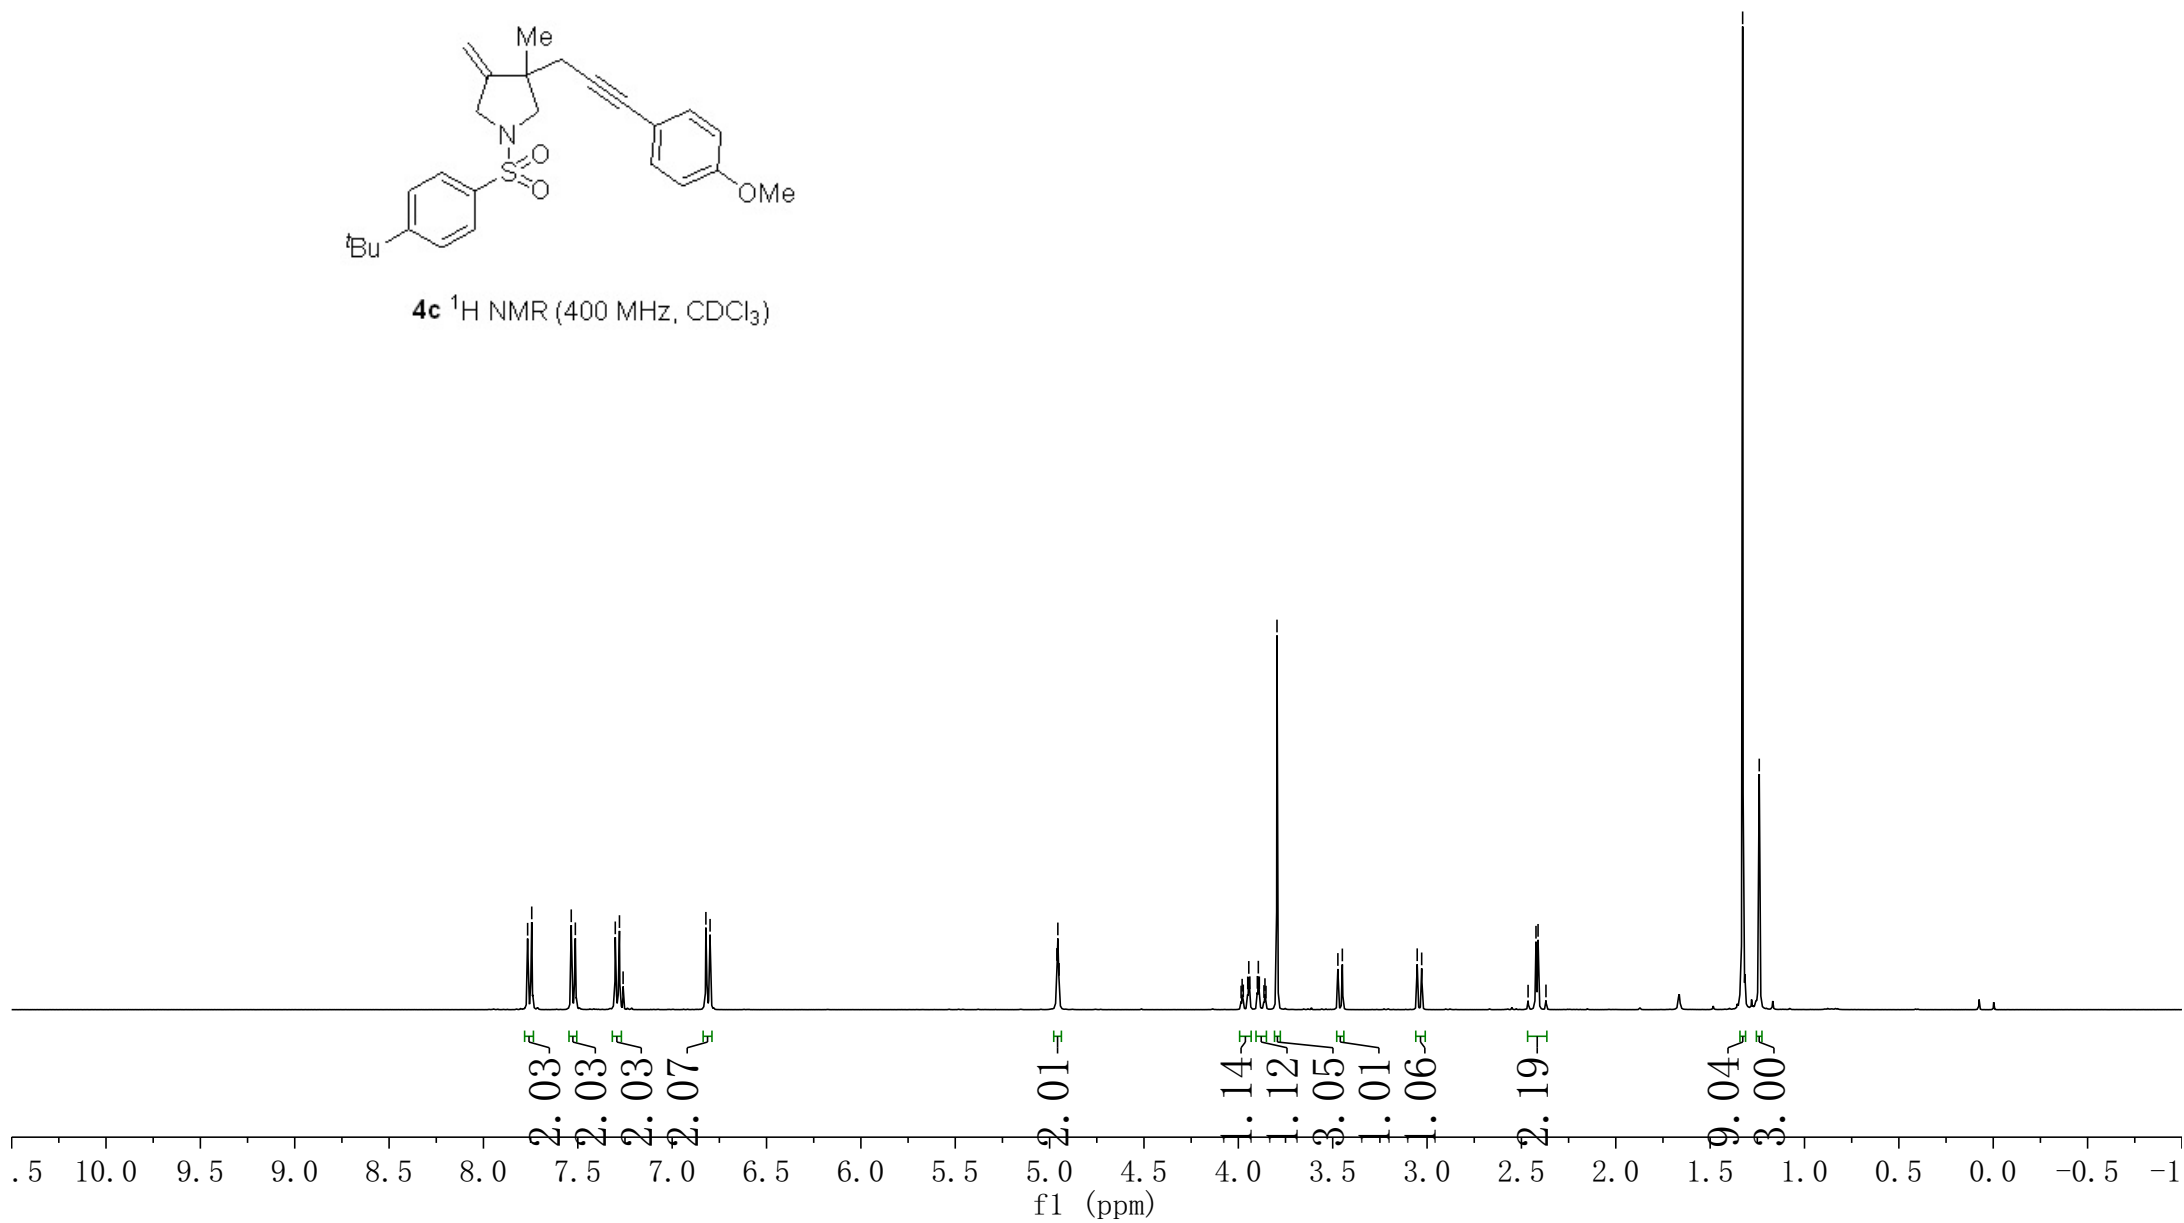

-159.190  
-156.518  
-150.793

132.861  
132.652  
127.610  
125.982

115.488  
113.798  
106.390

84.753  
82.313  
77.319  
77.000  
76.682

58.674  
55.225  
52.153  
45.310

35.097  
31.012  
29.996  
23.192

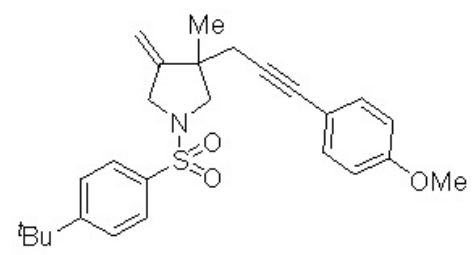

4c <sup>13</sup>C NMR (100 MHz, CDCl<sub>3</sub>)

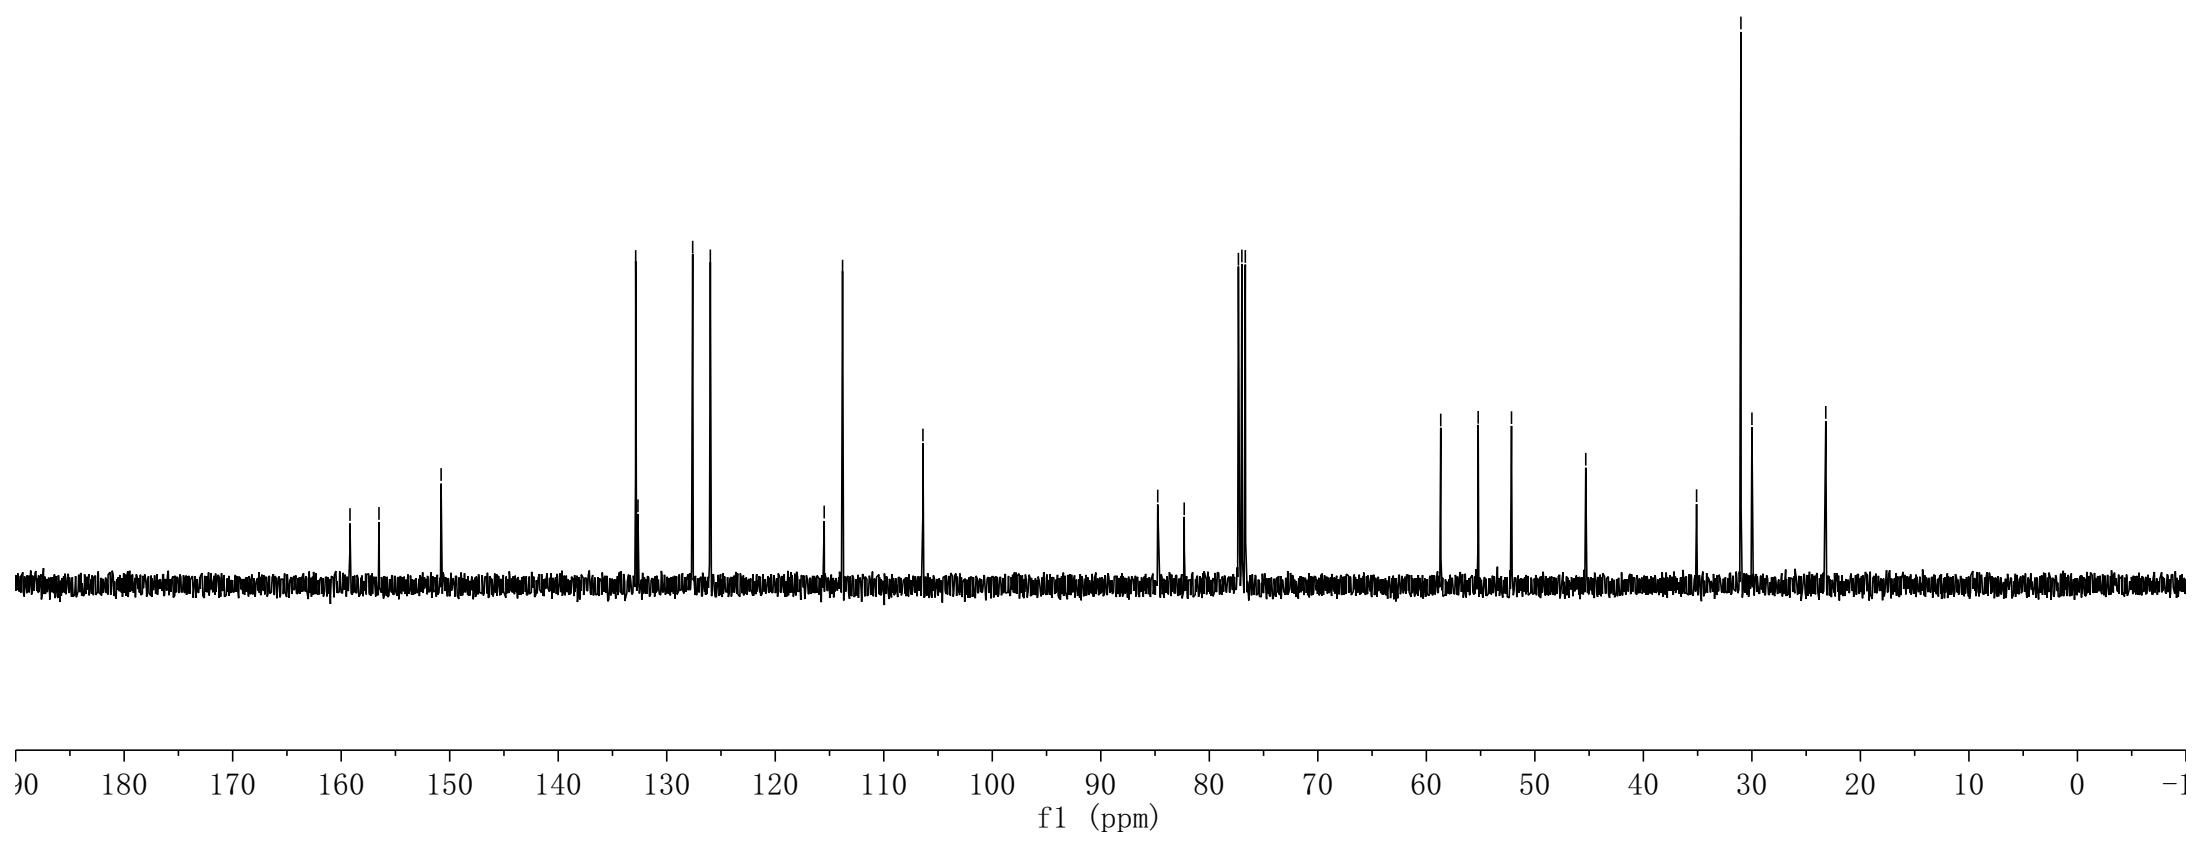

7.950  
7.946  
7.929  
7.926  
7.442  
7.439  
7.423  
7.420  
7.318  
7.309  
7.300  
7.292  
7.283  
7.267  
7.261  
7.253  
7.250  
7.244  
6.808  
6.785  
6.002  
4.996  
4.990  
4.985  
4.980  
3.986  
3.981  
3.975  
3.787  
3.517  
3.494  
3.173  
3.149  
2.664  
2.546  
2.504  
2.472  
2.430  
1.283  
-0.000

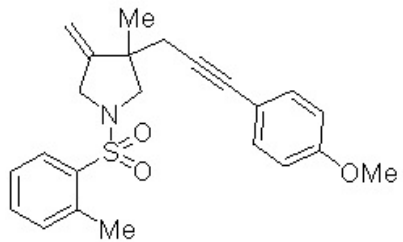

**4d** <sup>1</sup>H NMR (400 MHz, CDCl<sub>3</sub>)

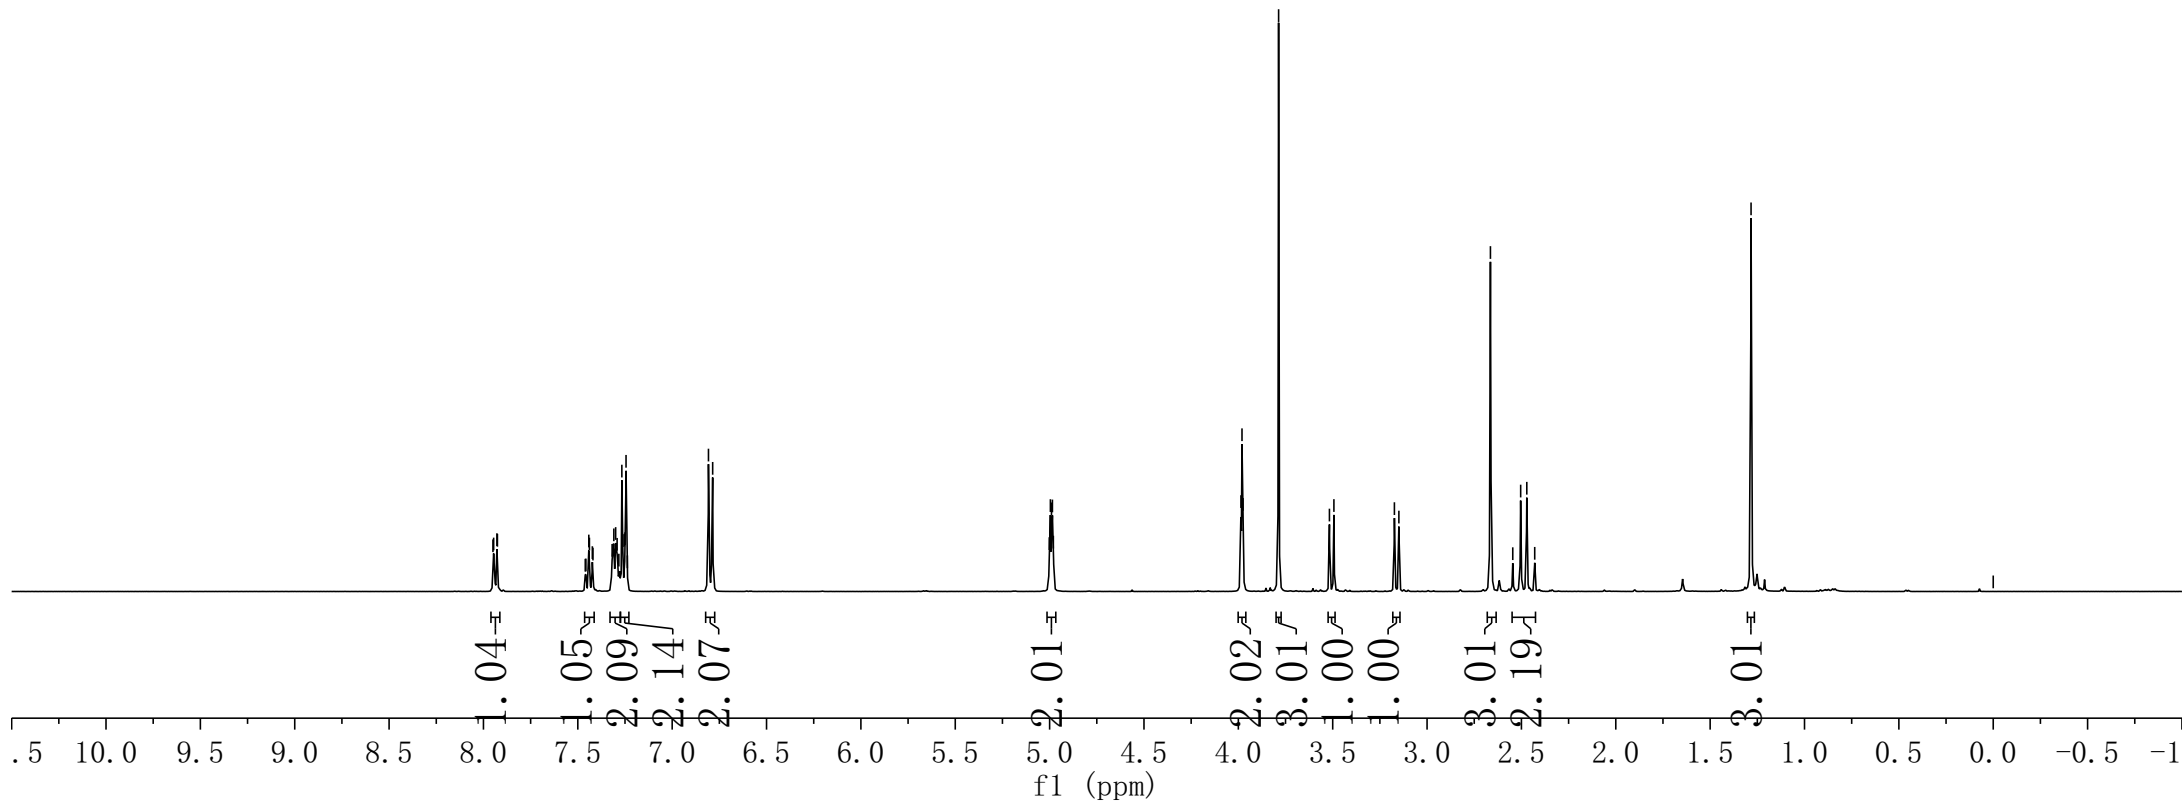

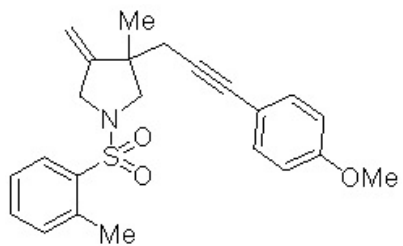

**4d**  $^{13}\text{C}$  NMR (100 MHz,  $\text{CDCl}_3$ )

-159.164  
 -150.722  
 138.069  
 135.892  
 132.843  
 132.828  
 132.652  
 129.884  
 126.024  
 -115.398  
 -113.734  
 -106.441

84.632  
 82.345  
 77.318  
 77.000  
 76.681

-58.063  
 -55.184  
 -51.608  
 -45.343

-29.989  
 -23.184  
 -20.659

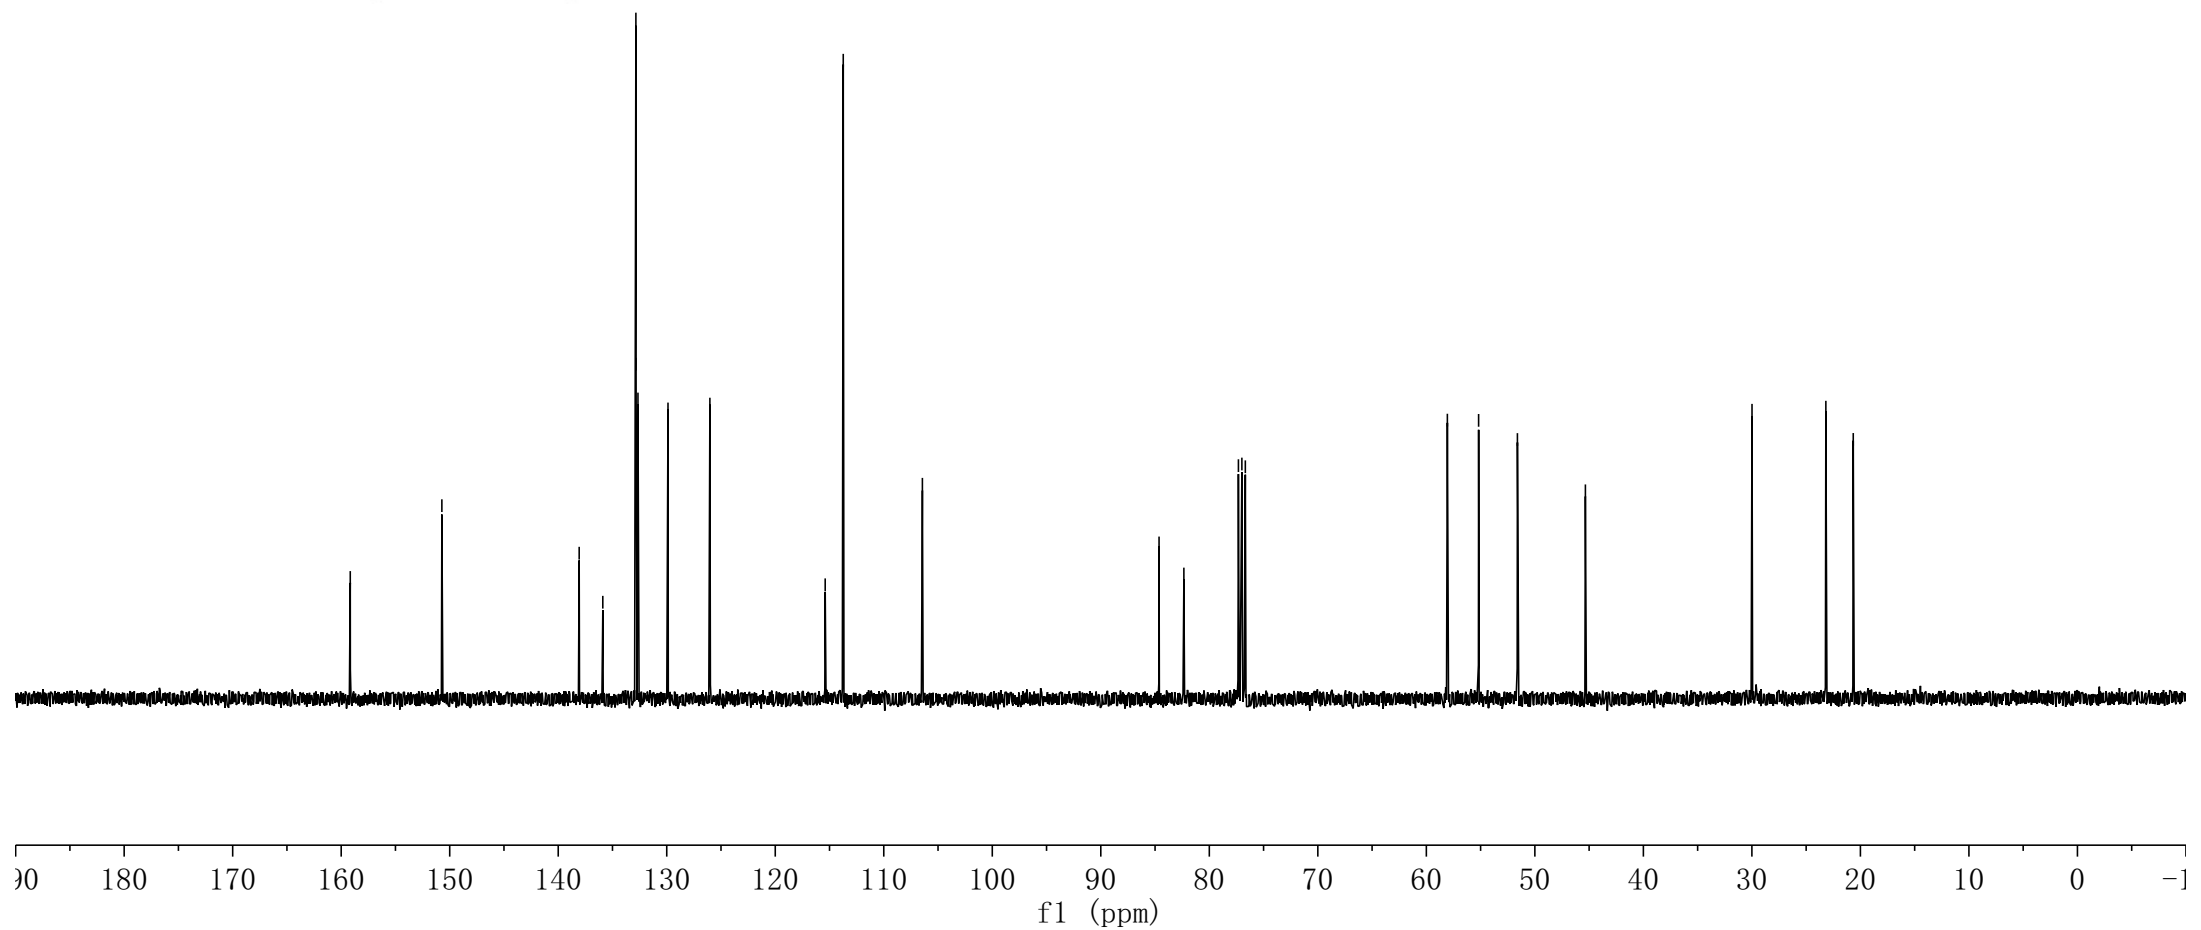

7.869  
7.856  
7.847  
7.834  
7.265  
7.253  
7.232  
7.211  
7.190  
7.169  
6.823  
6.801

4.978  
4.973  
4.967  
3.916  
3.910  
3.906  
3.804  
3.465  
3.442  
3.065  
3.042  
2.468  
2.426  
2.417  
2.375

-1.248

--0.000

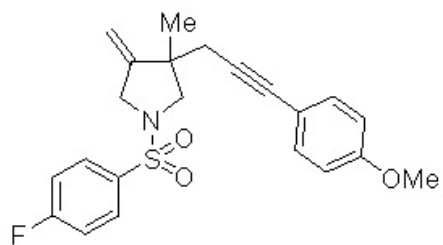

**4e** <sup>1</sup>H NMR (400 MHz, CDCl<sub>3</sub>)

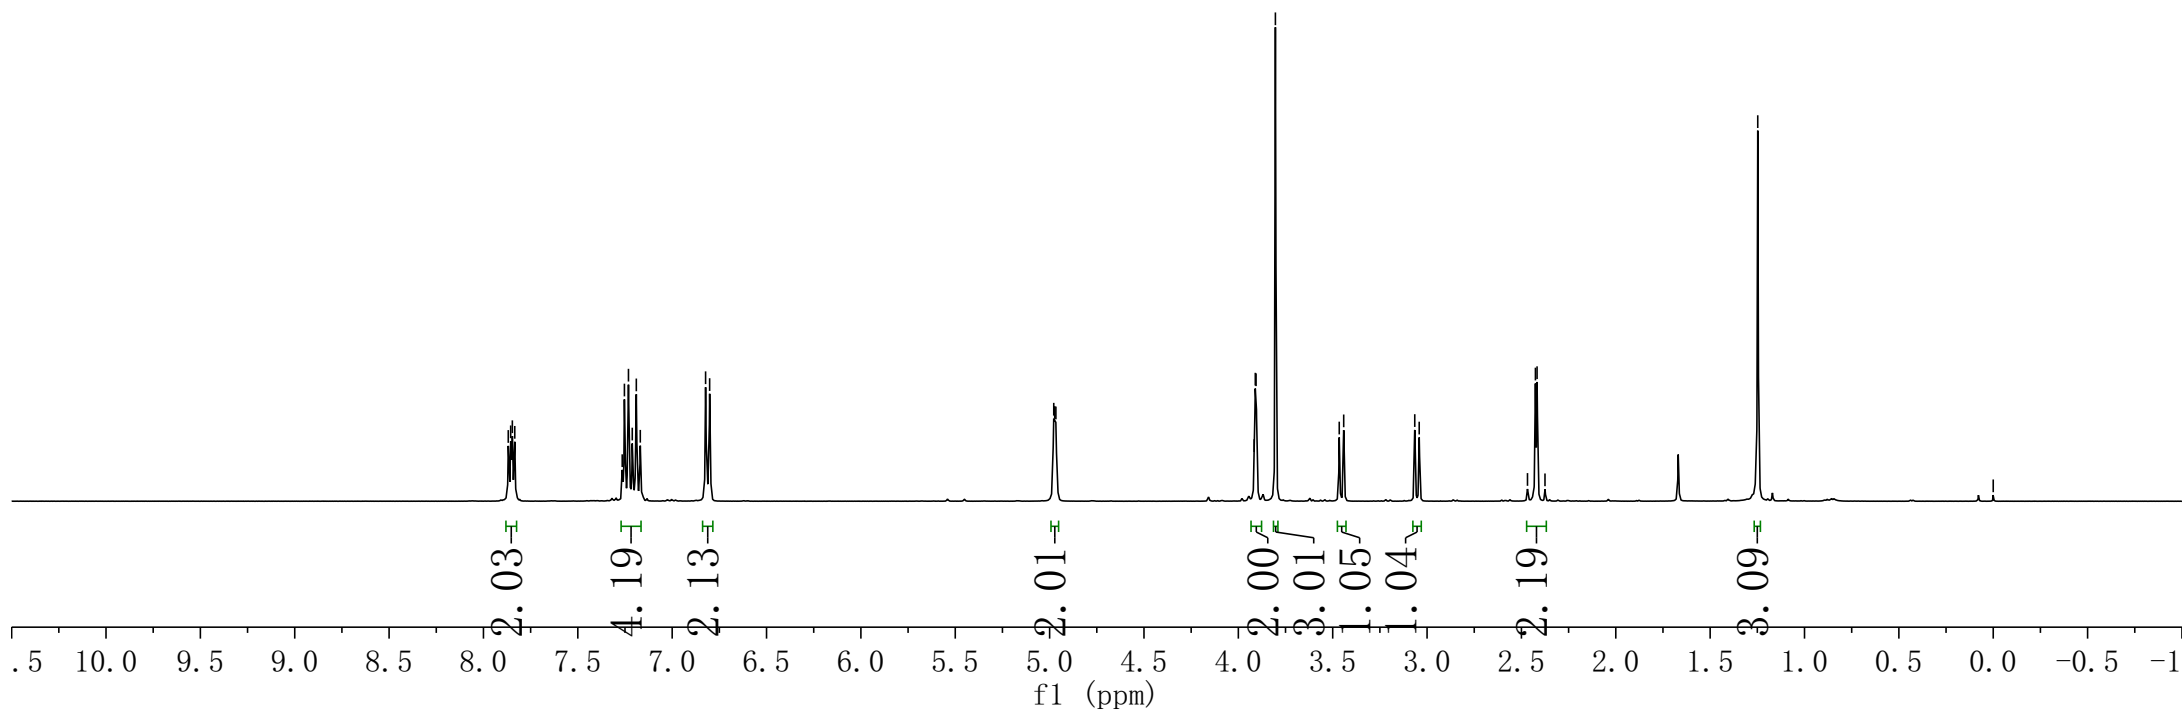



~166.494  
~163.957  
~159.288

-150.399

132.863  
131.763  
130.454  
130.362  
116.423  
116.200  
115.347  
113.838  
106.695

84.588  
82.492  
77.318  
77.000  
76.682

~58.685  
~55.275  
~52.301  
~45.353

-30.020  
-23.575

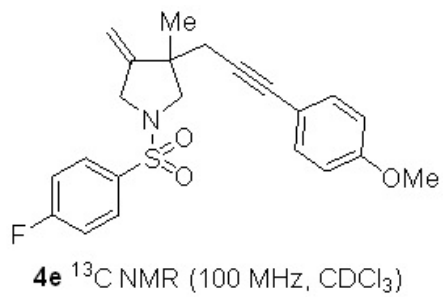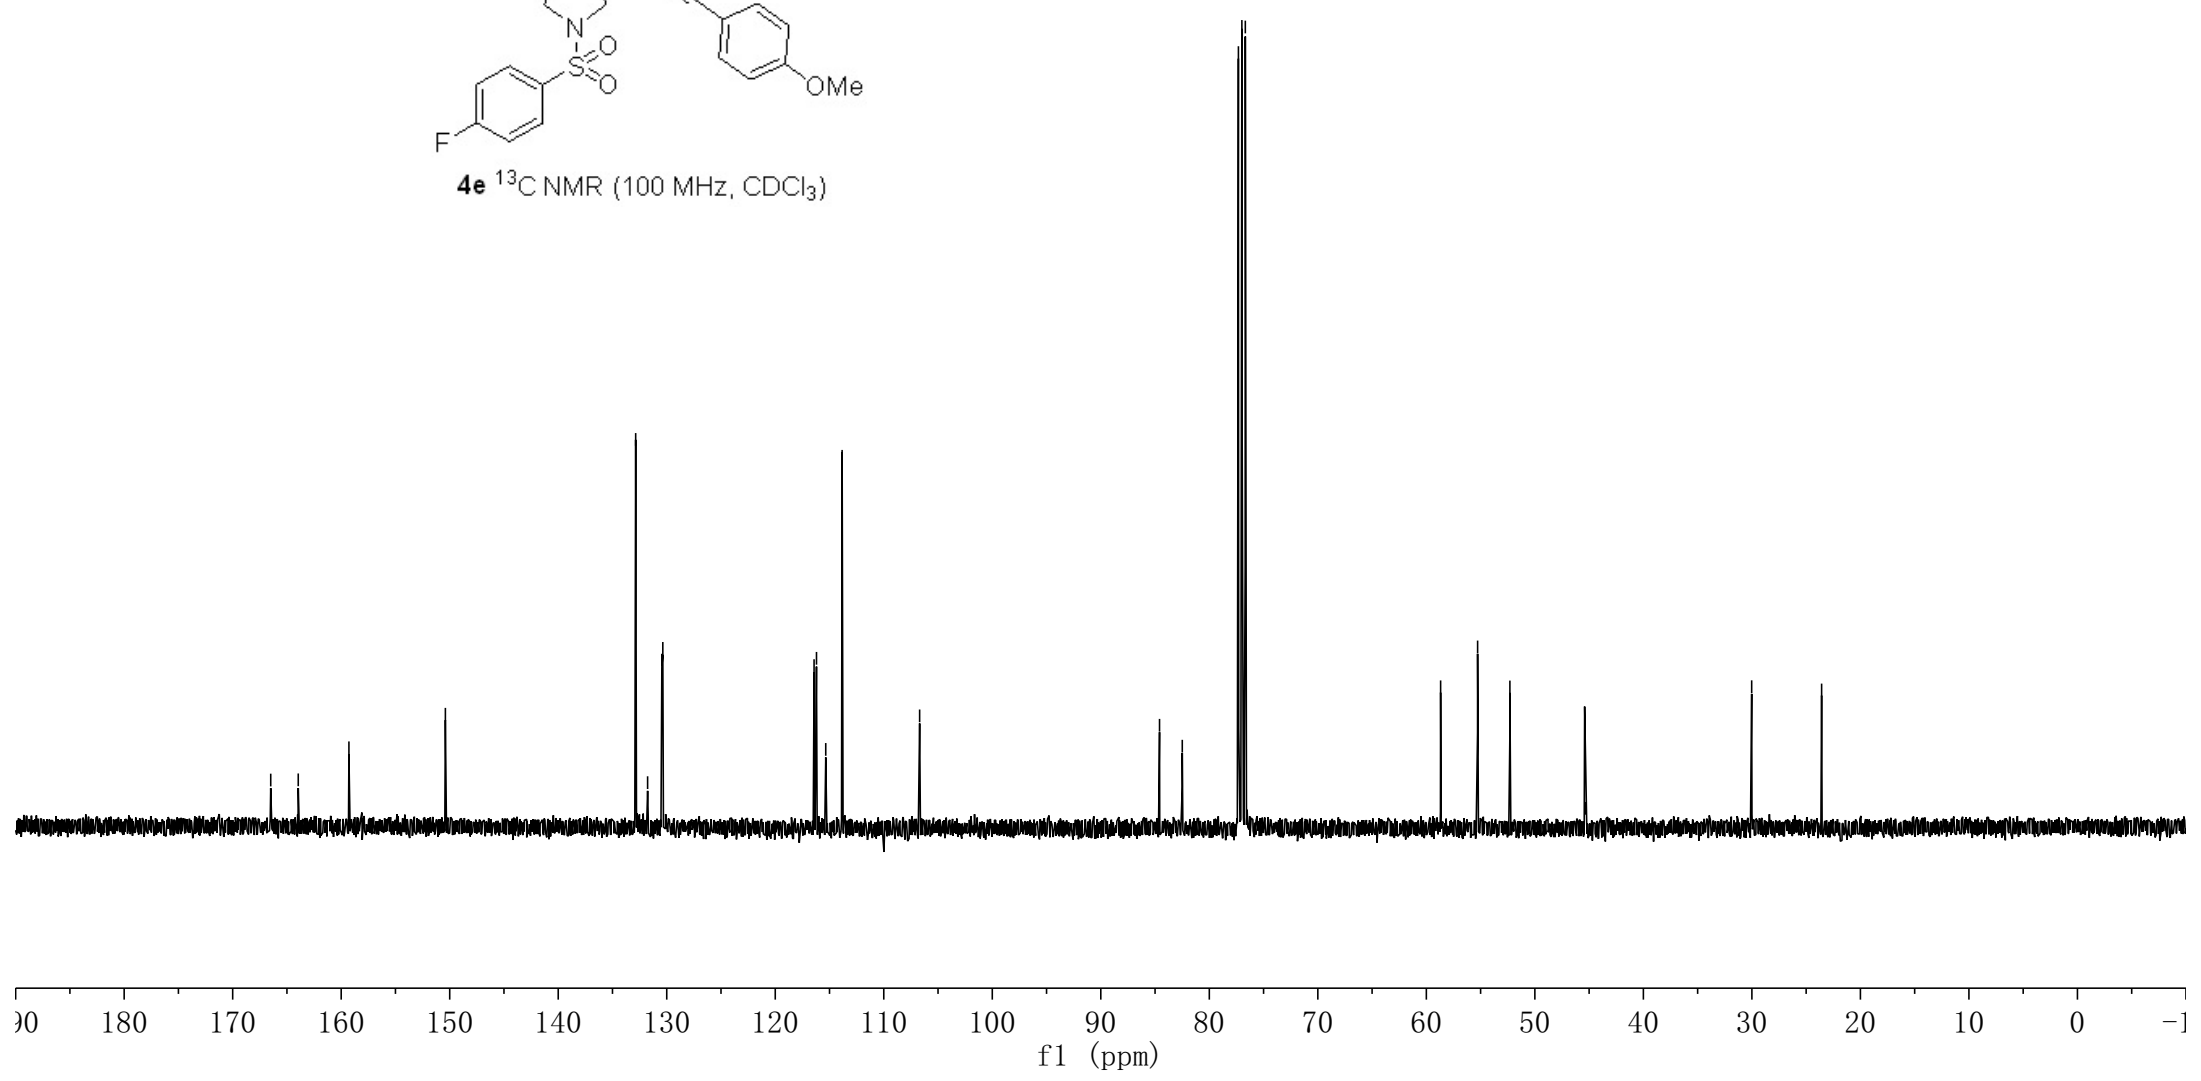

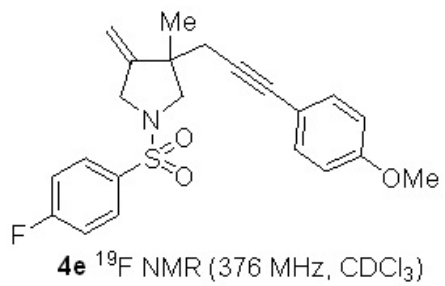

--104.831

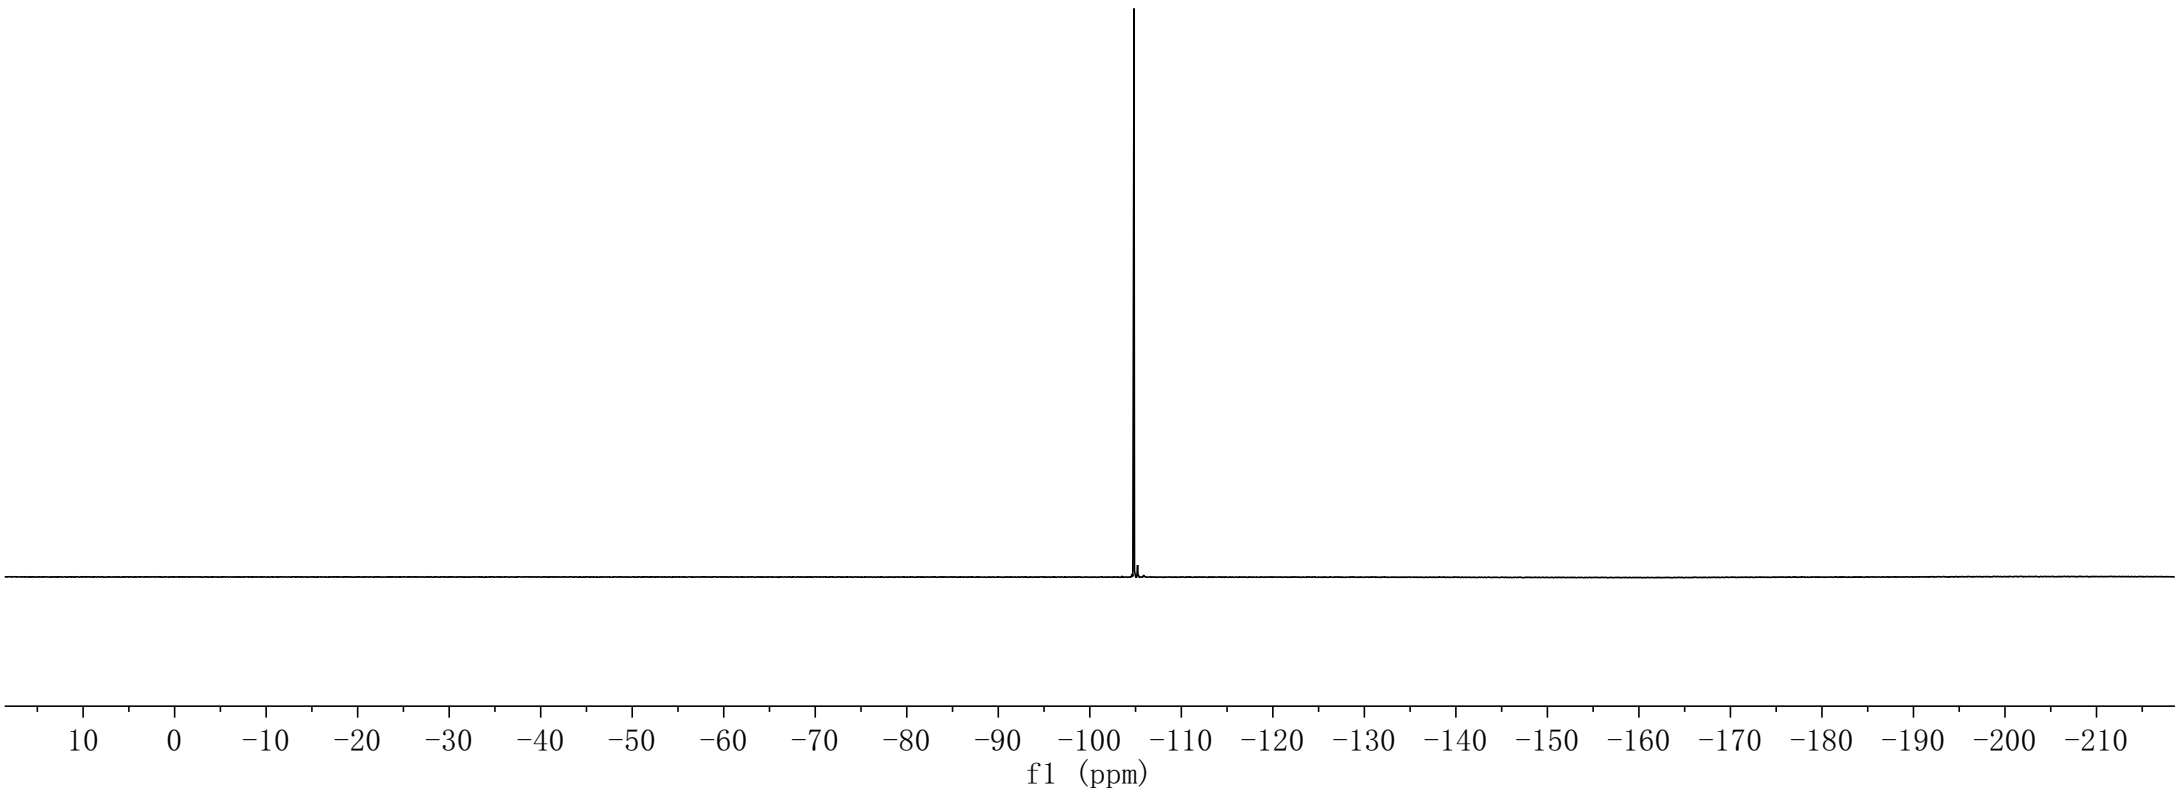

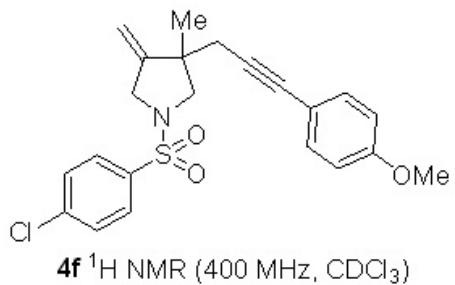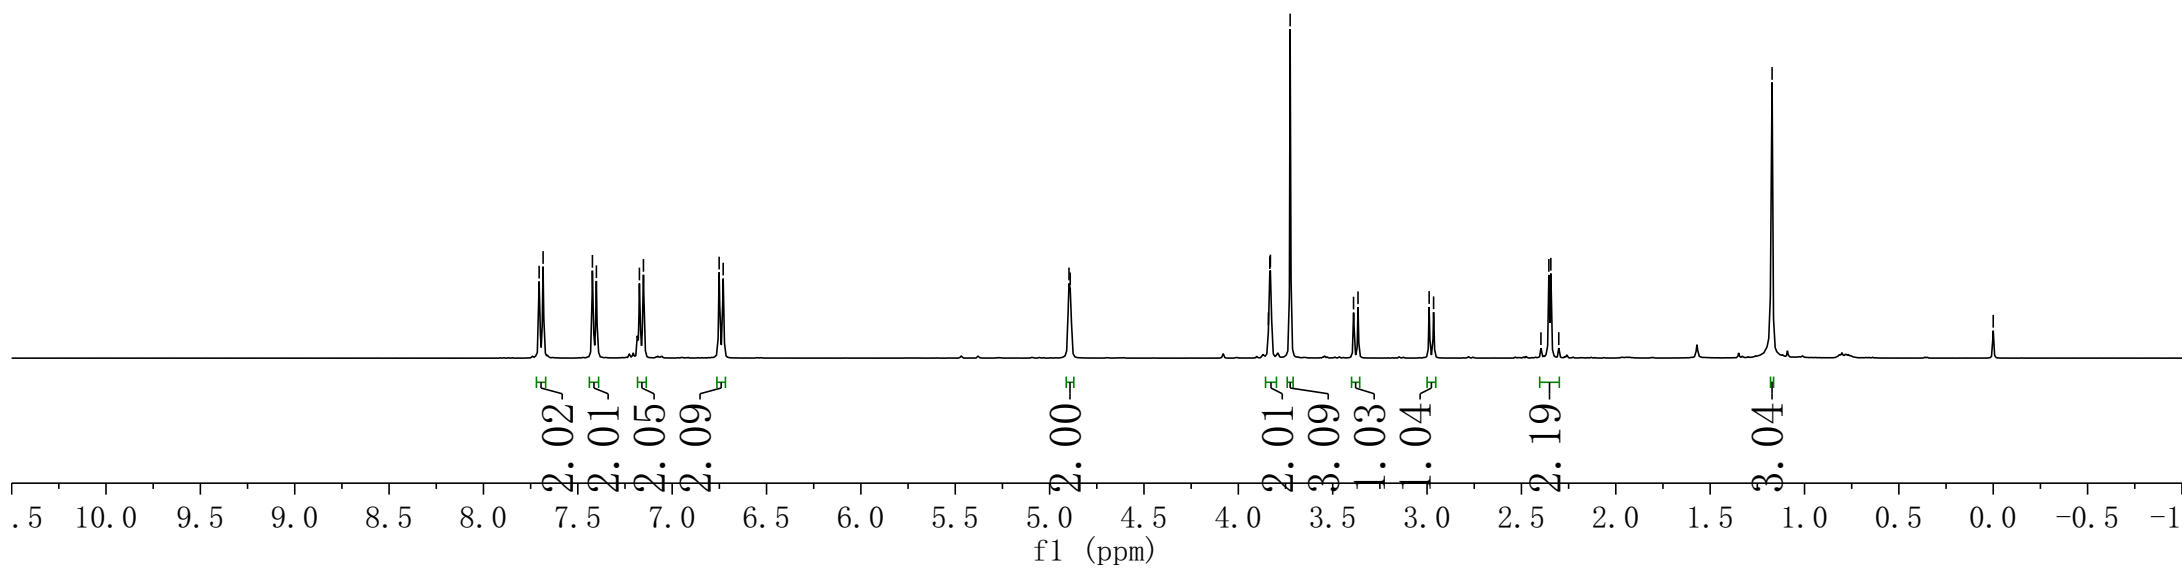

-159.257  
 -150.277  
 139.343  
 134.236  
 132.820  
 129.330  
 129.112  
 -115.317  
 113.843  
 -106.704  
 84.528  
 82.490  
 77.319  
 77.000  
 76.682  
 -58.643  
 -55.234  
 -52.248  
 -45.392  
 -29.967  
 -23.543

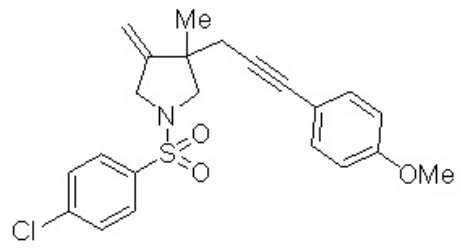

4f <sup>13</sup>C NMR (100 MHz, CDCl<sub>3</sub>)

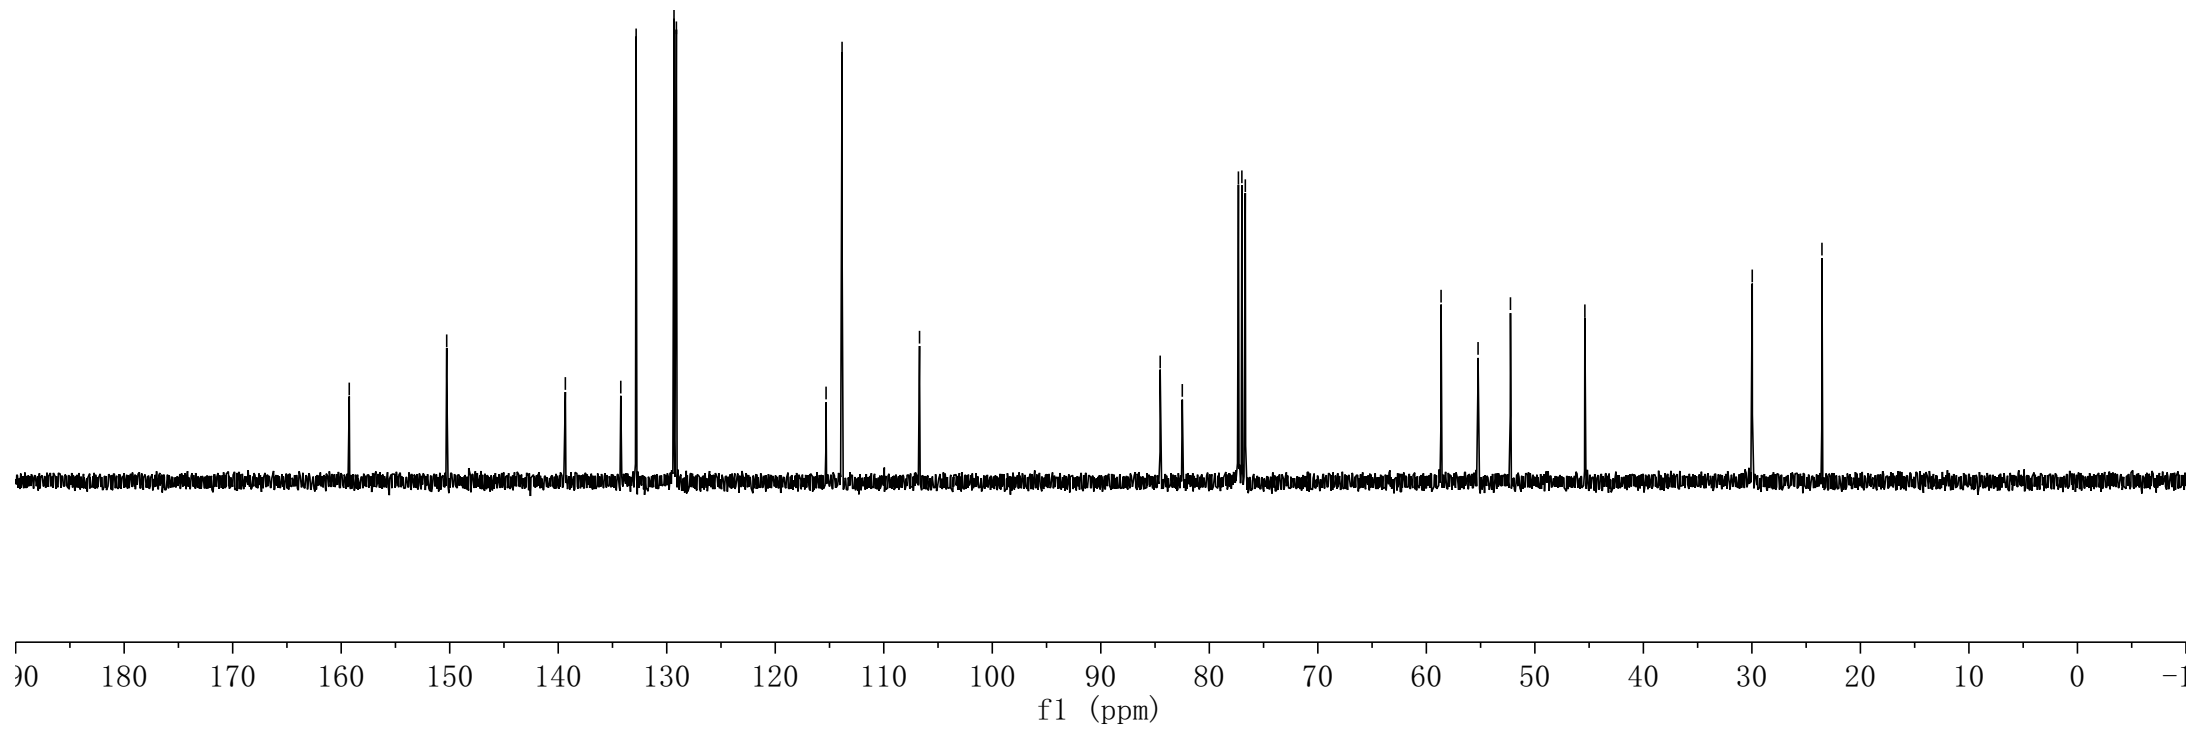

7.971  
7.951  
7.793  
7.772  
7.260  
7.254  
7.238  
6.818  
6.796

4.982  
4.977  
4.972  
3.995  
3.989  
3.983  
3.978  
3.960  
3.954  
3.949  
3.941  
3.936  
3.931  
3.906  
3.901  
3.895  
3.800  
3.508  
3.484  
3.089  
3.065  
2.470  
2.427  
2.423  
2.381  
1.250

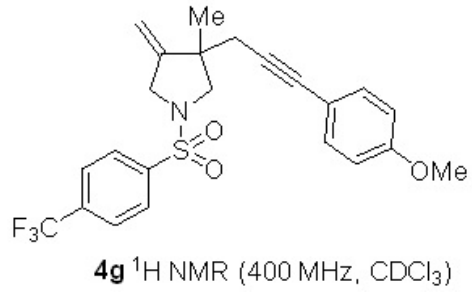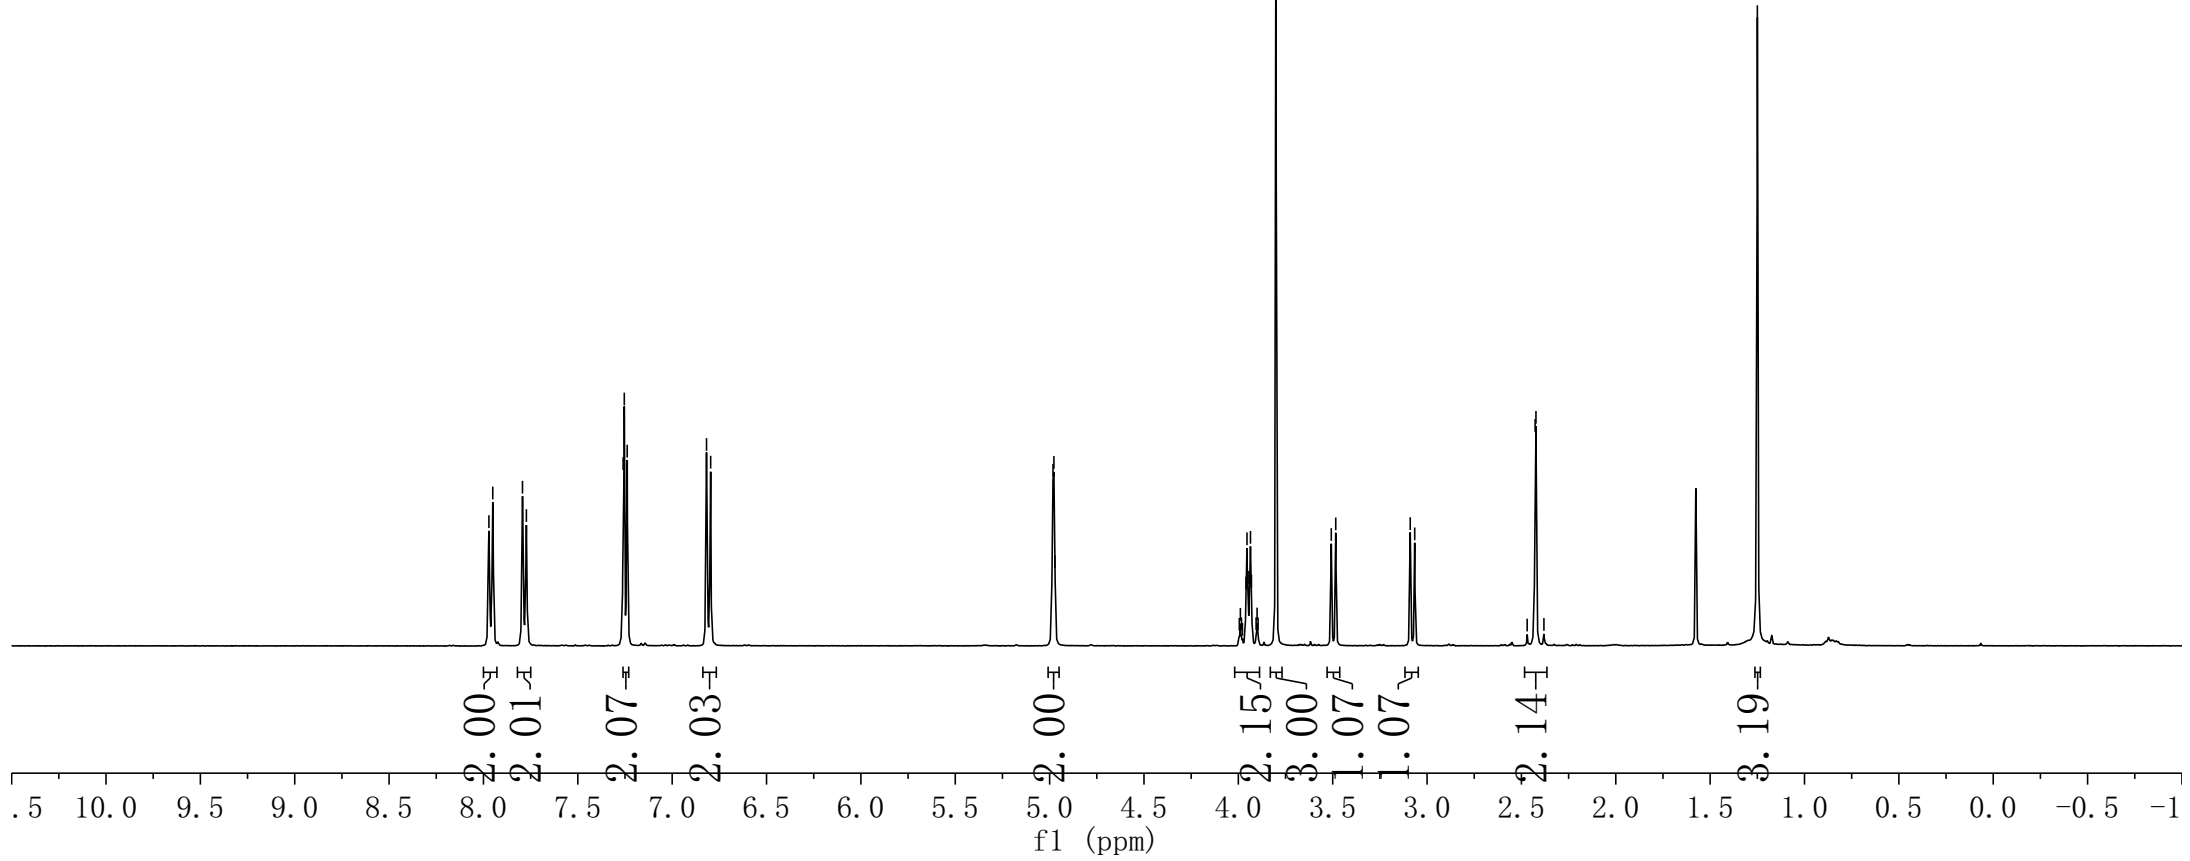

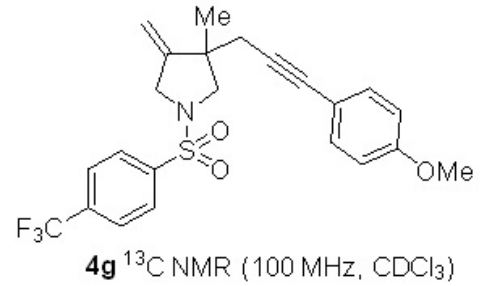

- 159.308
- 150.041
- 139.544
- 134.929
- 134.600
- 134.271
- 133.941
- 132.842
- 128.139
- 127.269
- 126.265
- 126.229
- 126.192
- 126.154
- 124.553
- 121.836
- 119.120
- 115.280
- 113.845
- 106.919
- 84.409
- 82.562
- 77.318
- 77.000
- 76.682
- 58.656
- 55.240
- 52.174
- 45.460
- 29.945
- 23.363

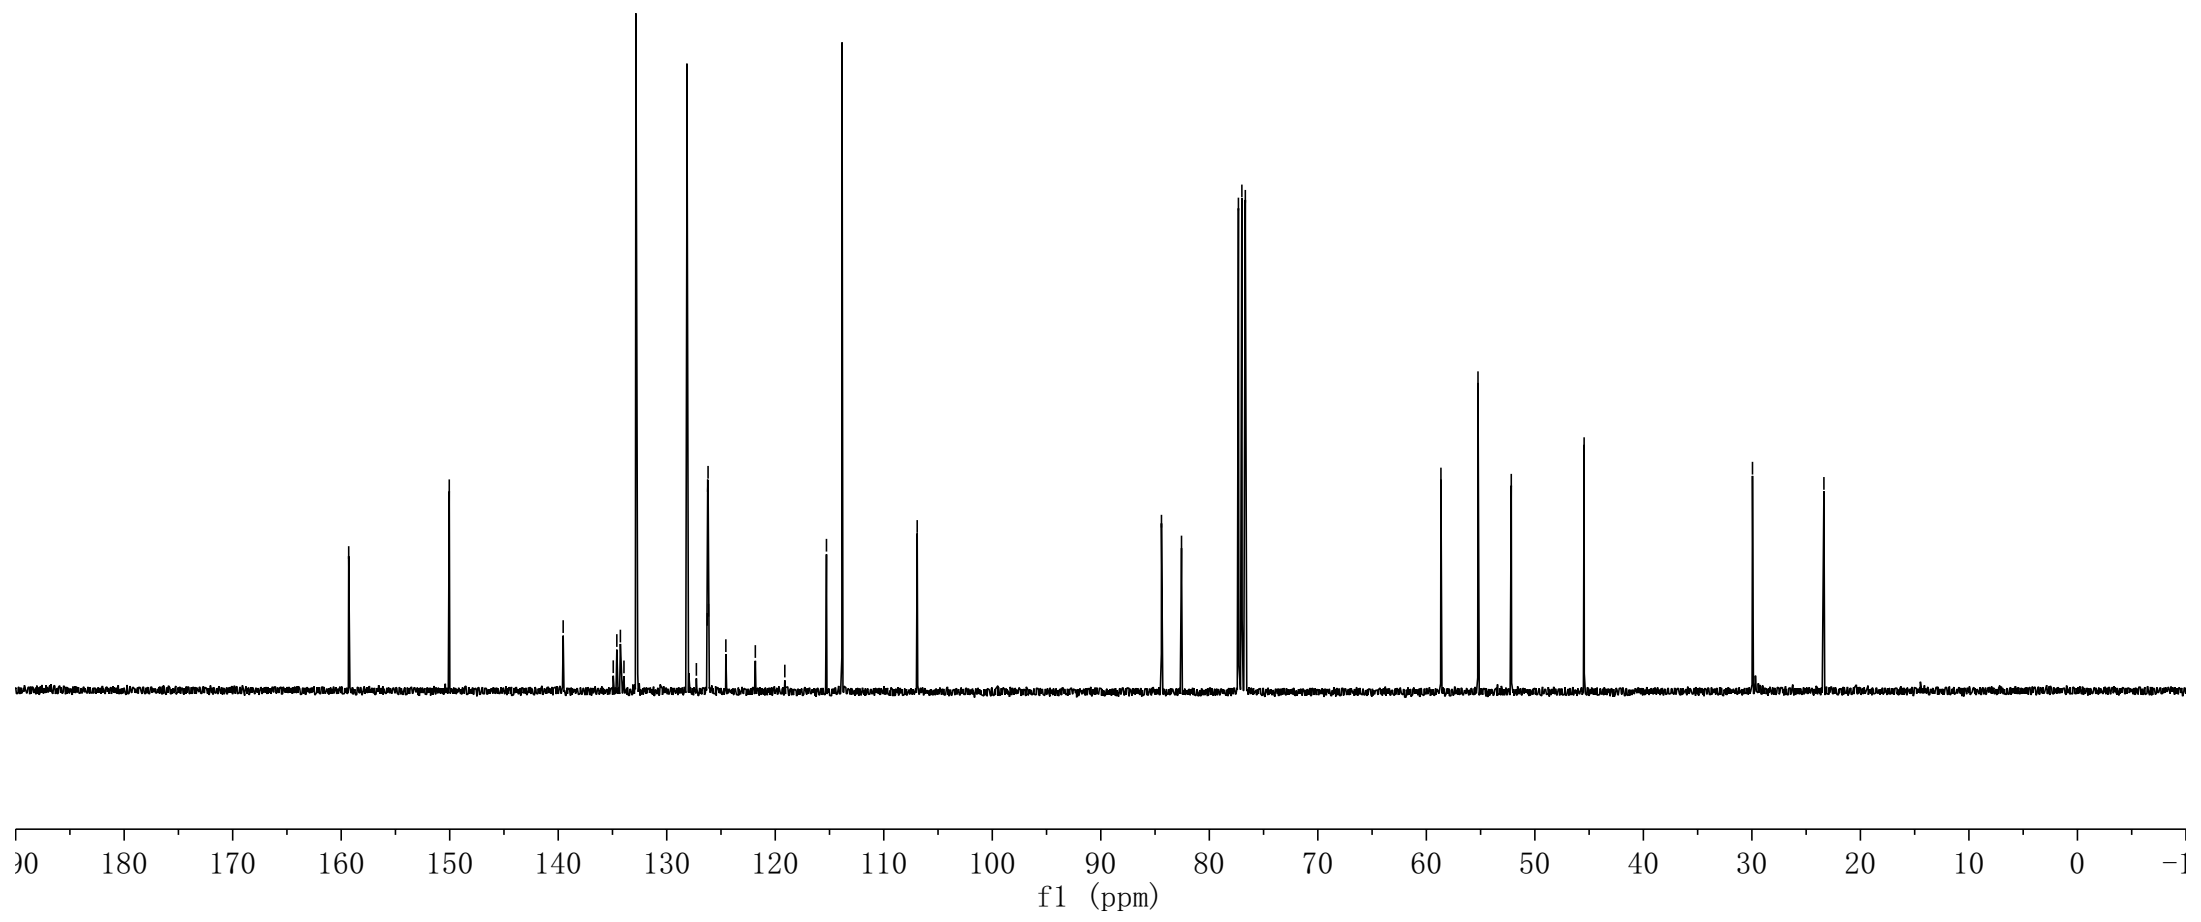

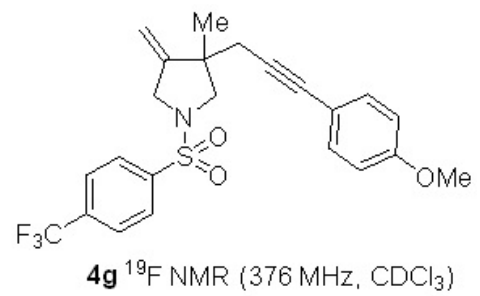

--63.036

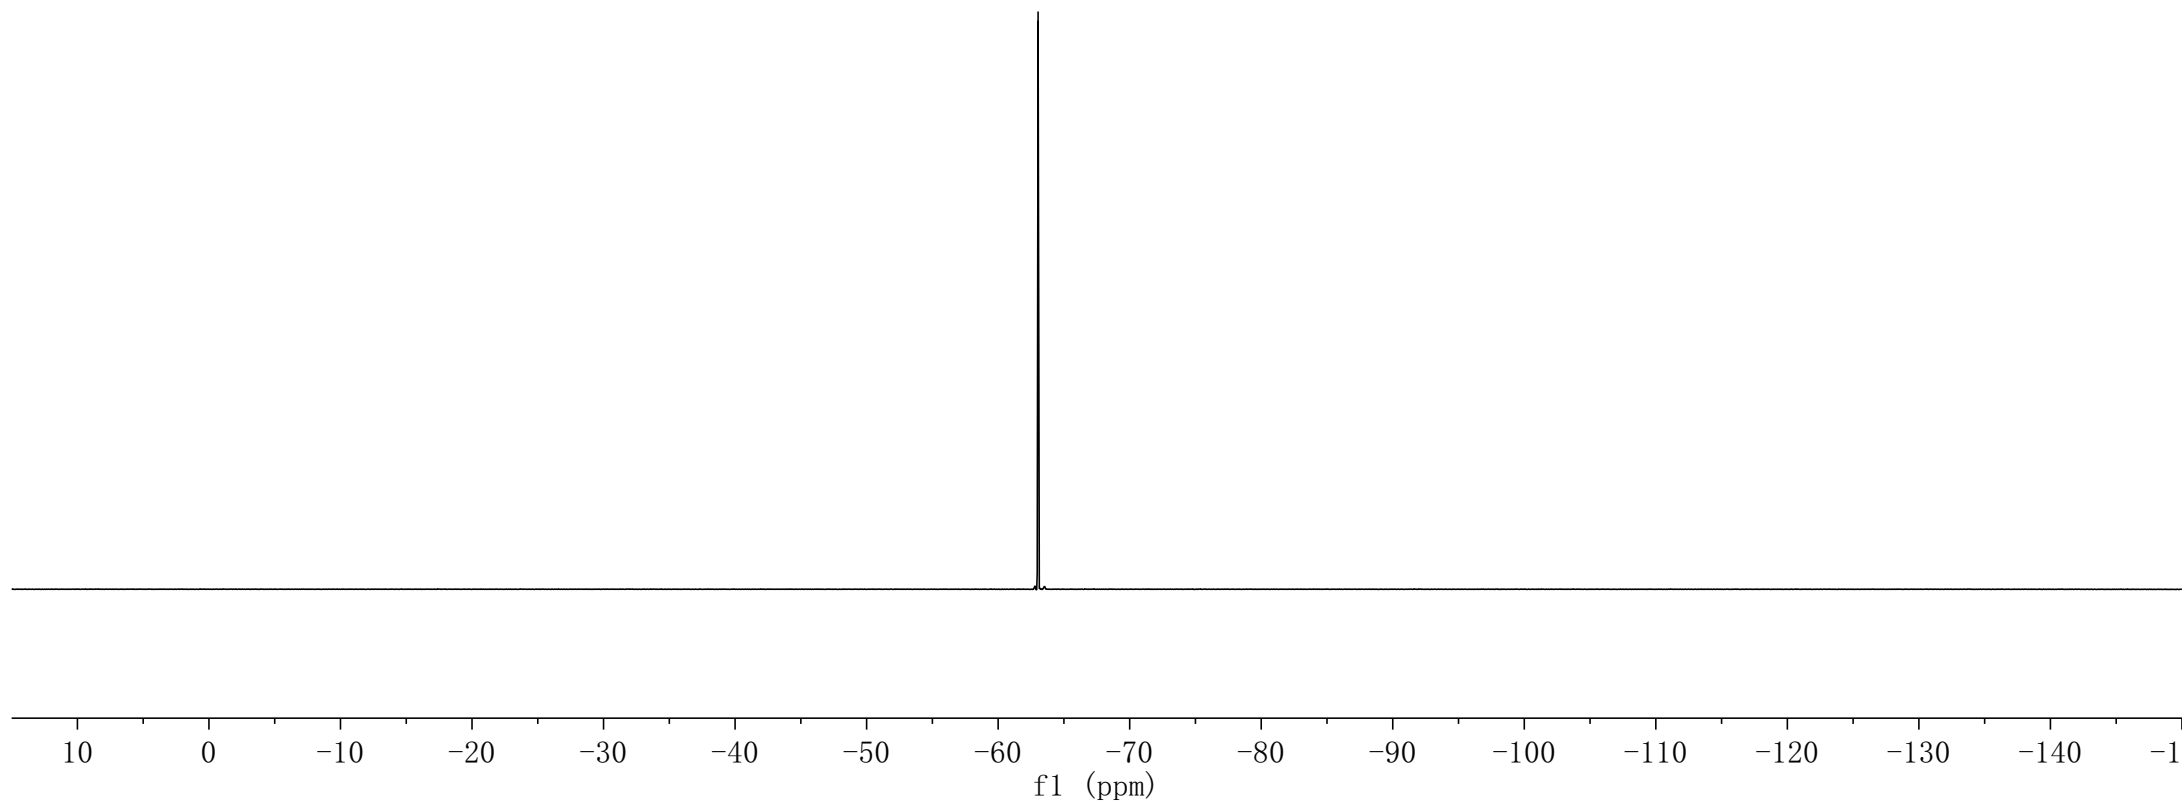

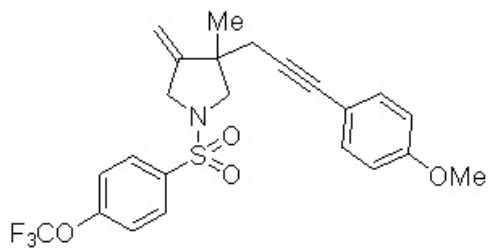

**4h**  $^1\text{H}$  NMR (400 MHz,  $\text{CDCl}_3$ )

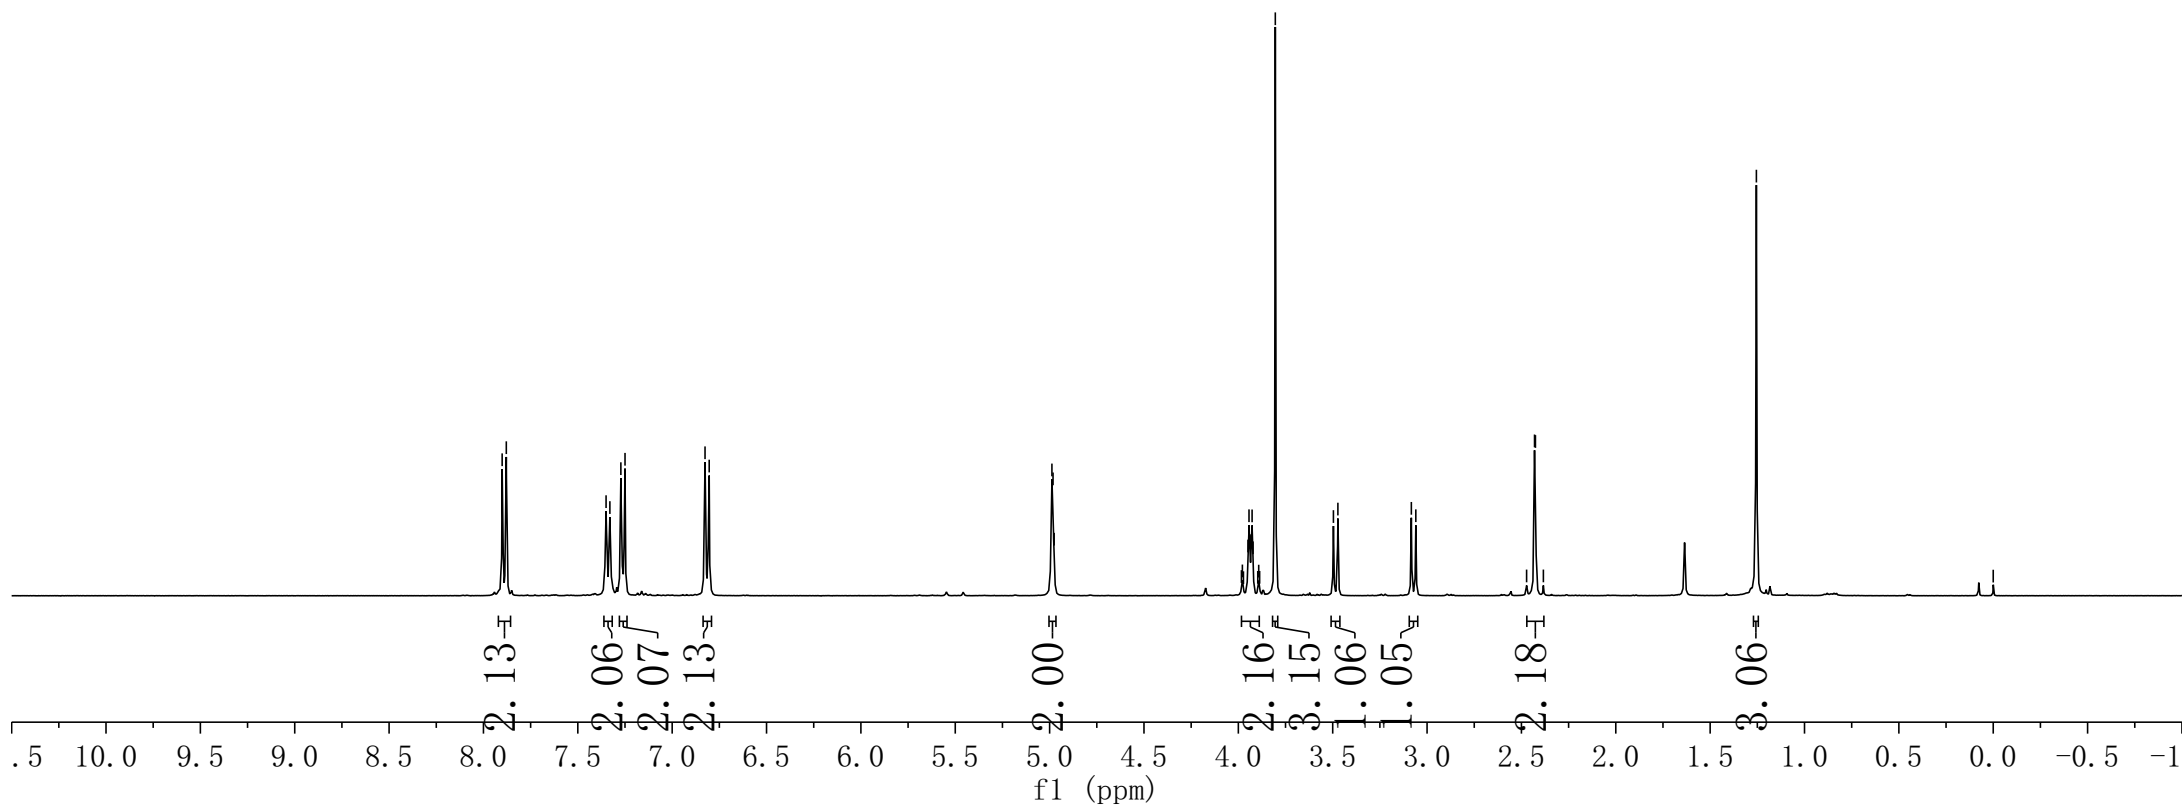



159.279  
152.250  
152.233  
150.234  
134.227  
132.837  
129.784  
124.030  
121.448  
120.793  
118.867  
116.286  
115.308  
113.822  
106.788

84.495  
82.502  
77.318  
77.000  
76.682

58.651  
55.214  
52.204  
45.414

29.968  
23.380

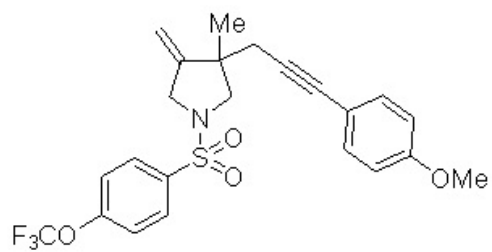

4h <sup>13</sup>C NMR (100 MHz, CDCl<sub>3</sub>)

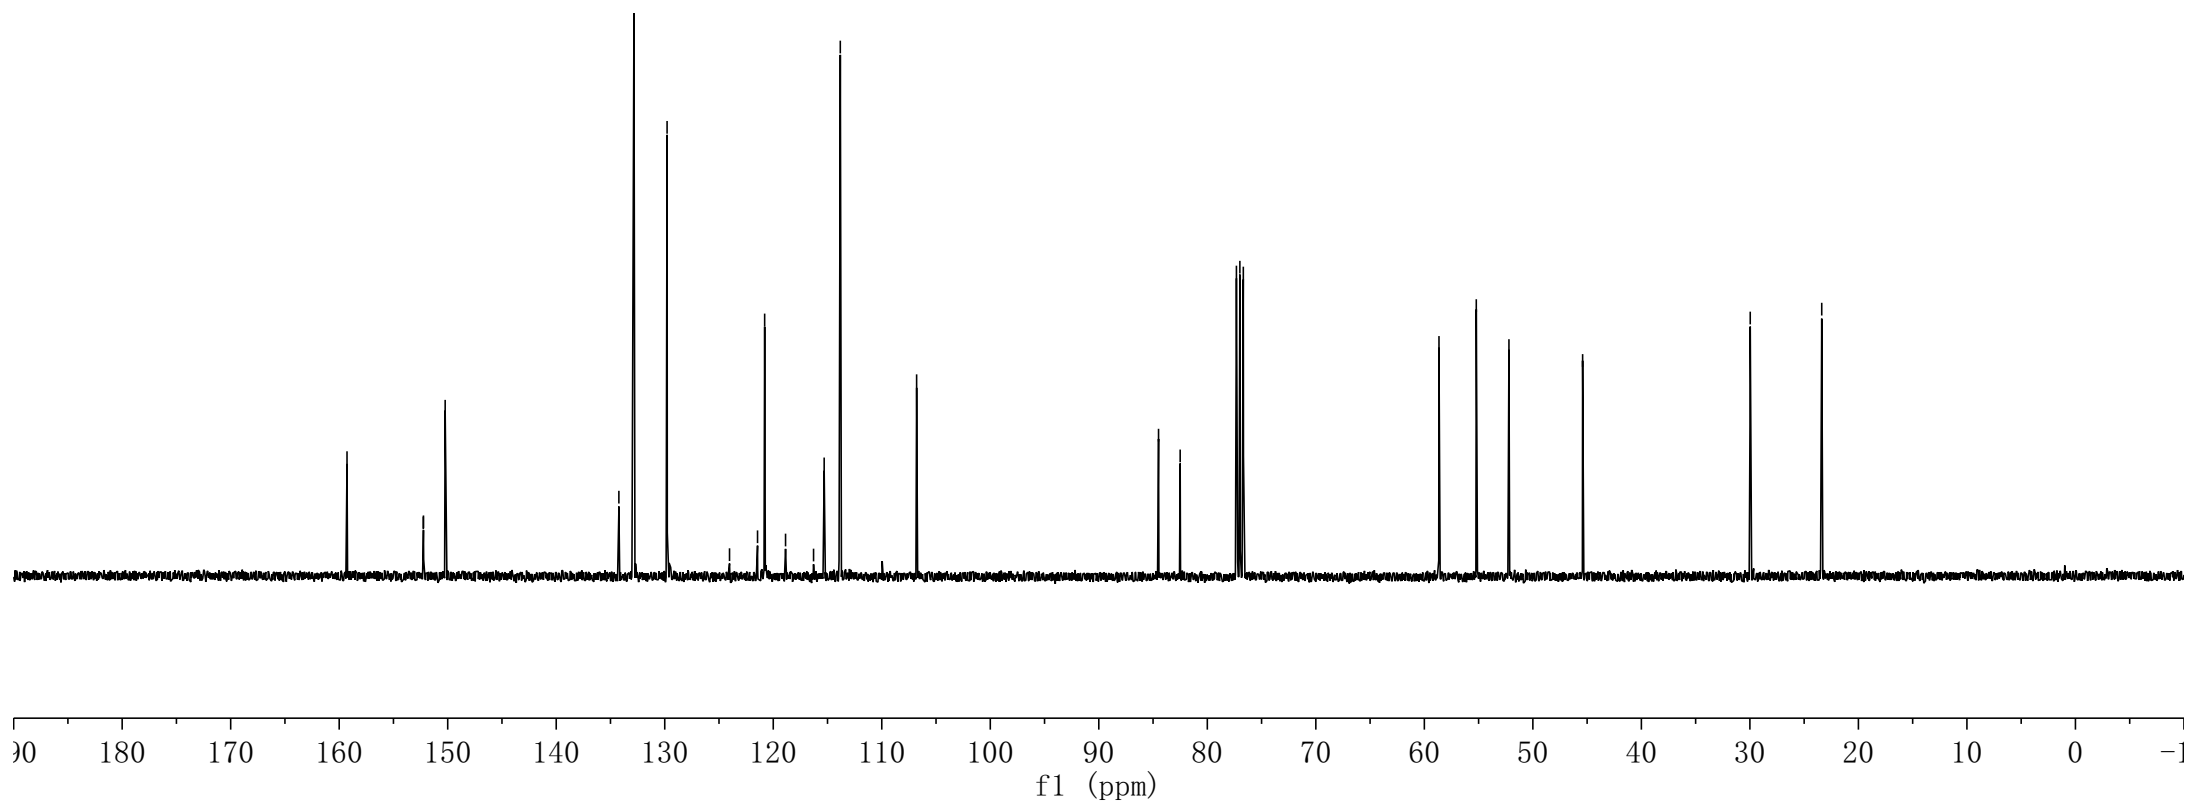

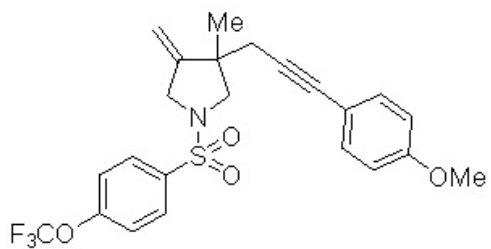

4h <sup>19</sup>F NMR (376 MHz, CDCl<sub>3</sub>)

--57.643

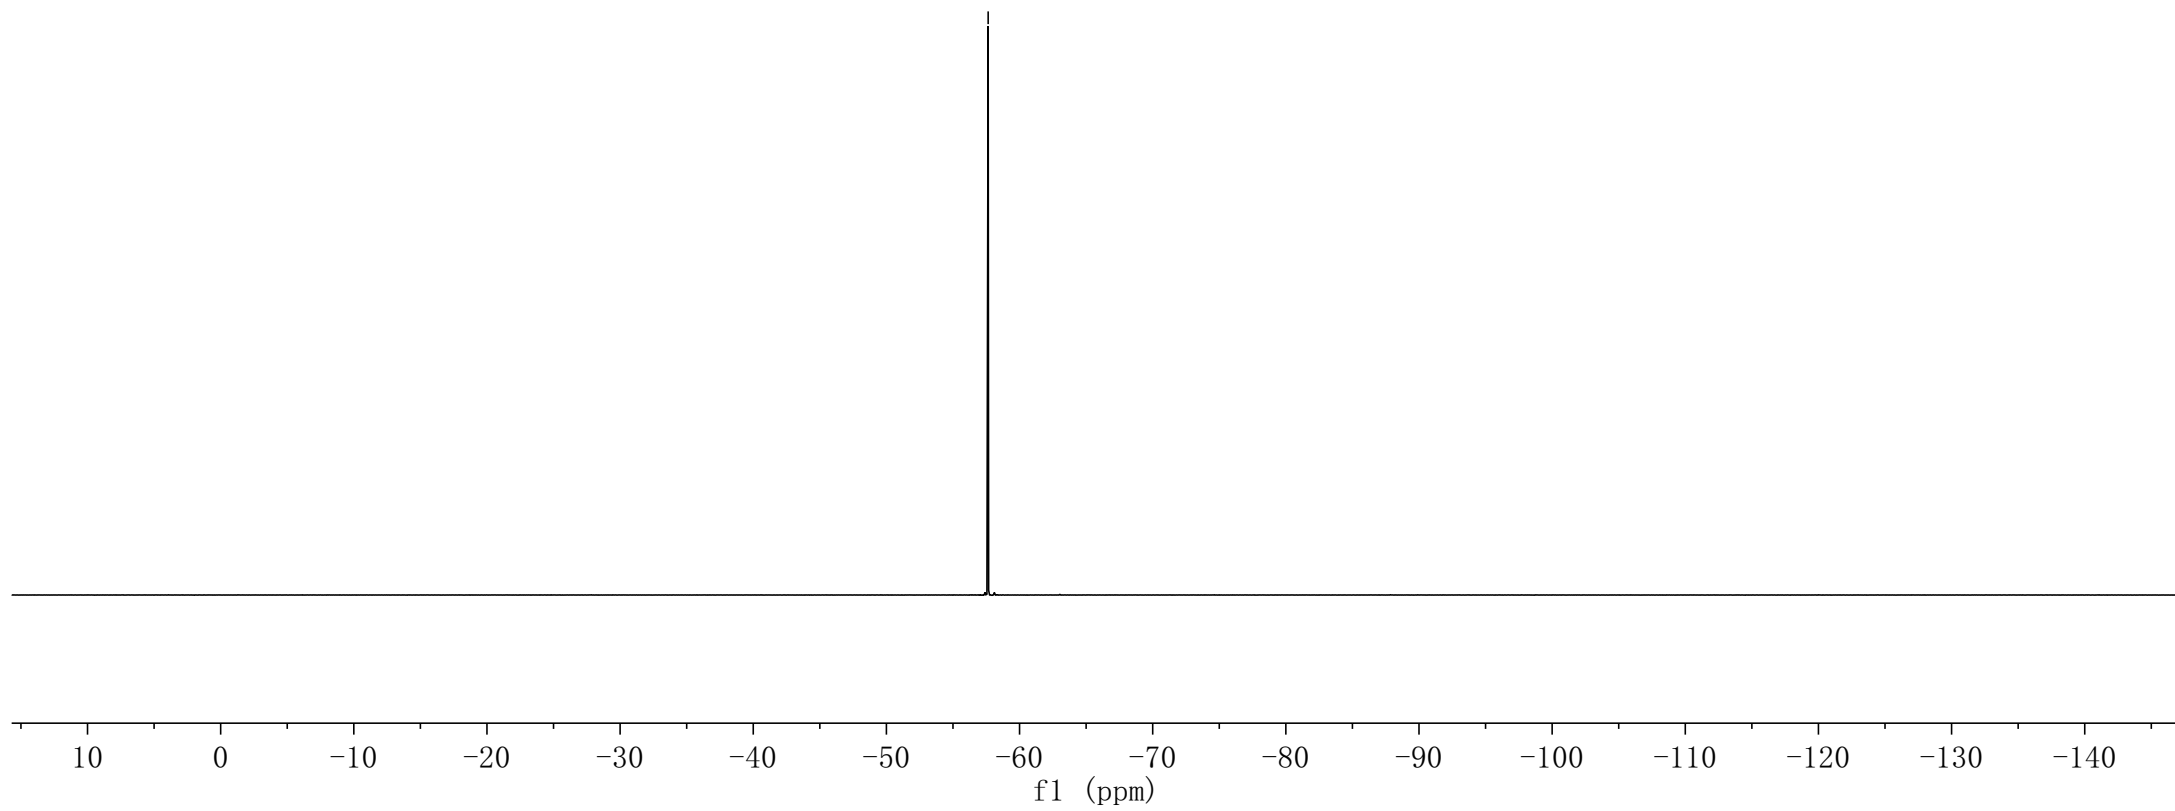

7.608  
7.605  
7.599  
7.595  
7.593  
7.590  
7.580  
7.577  
7.287  
7.265  
7.141  
7.132  
7.129  
7.119  
6.823  
6.801  
4.993  
4.983  
4.977  
4.972

4.039  
4.034  
4.029  
4.003  
3.999  
3.993  
3.976  
3.970  
3.965  
3.940  
3.935  
3.930  
3.800  
3.520  
3.496  
3.107  
3.083  
2.481  
2.439  
2.423  
2.381  
1.252

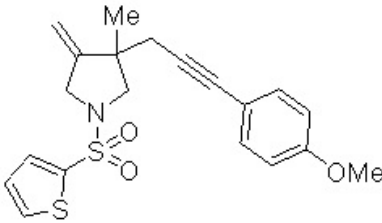

4i <sup>1</sup>H NMR (400 MHz, CDCl<sub>3</sub>)

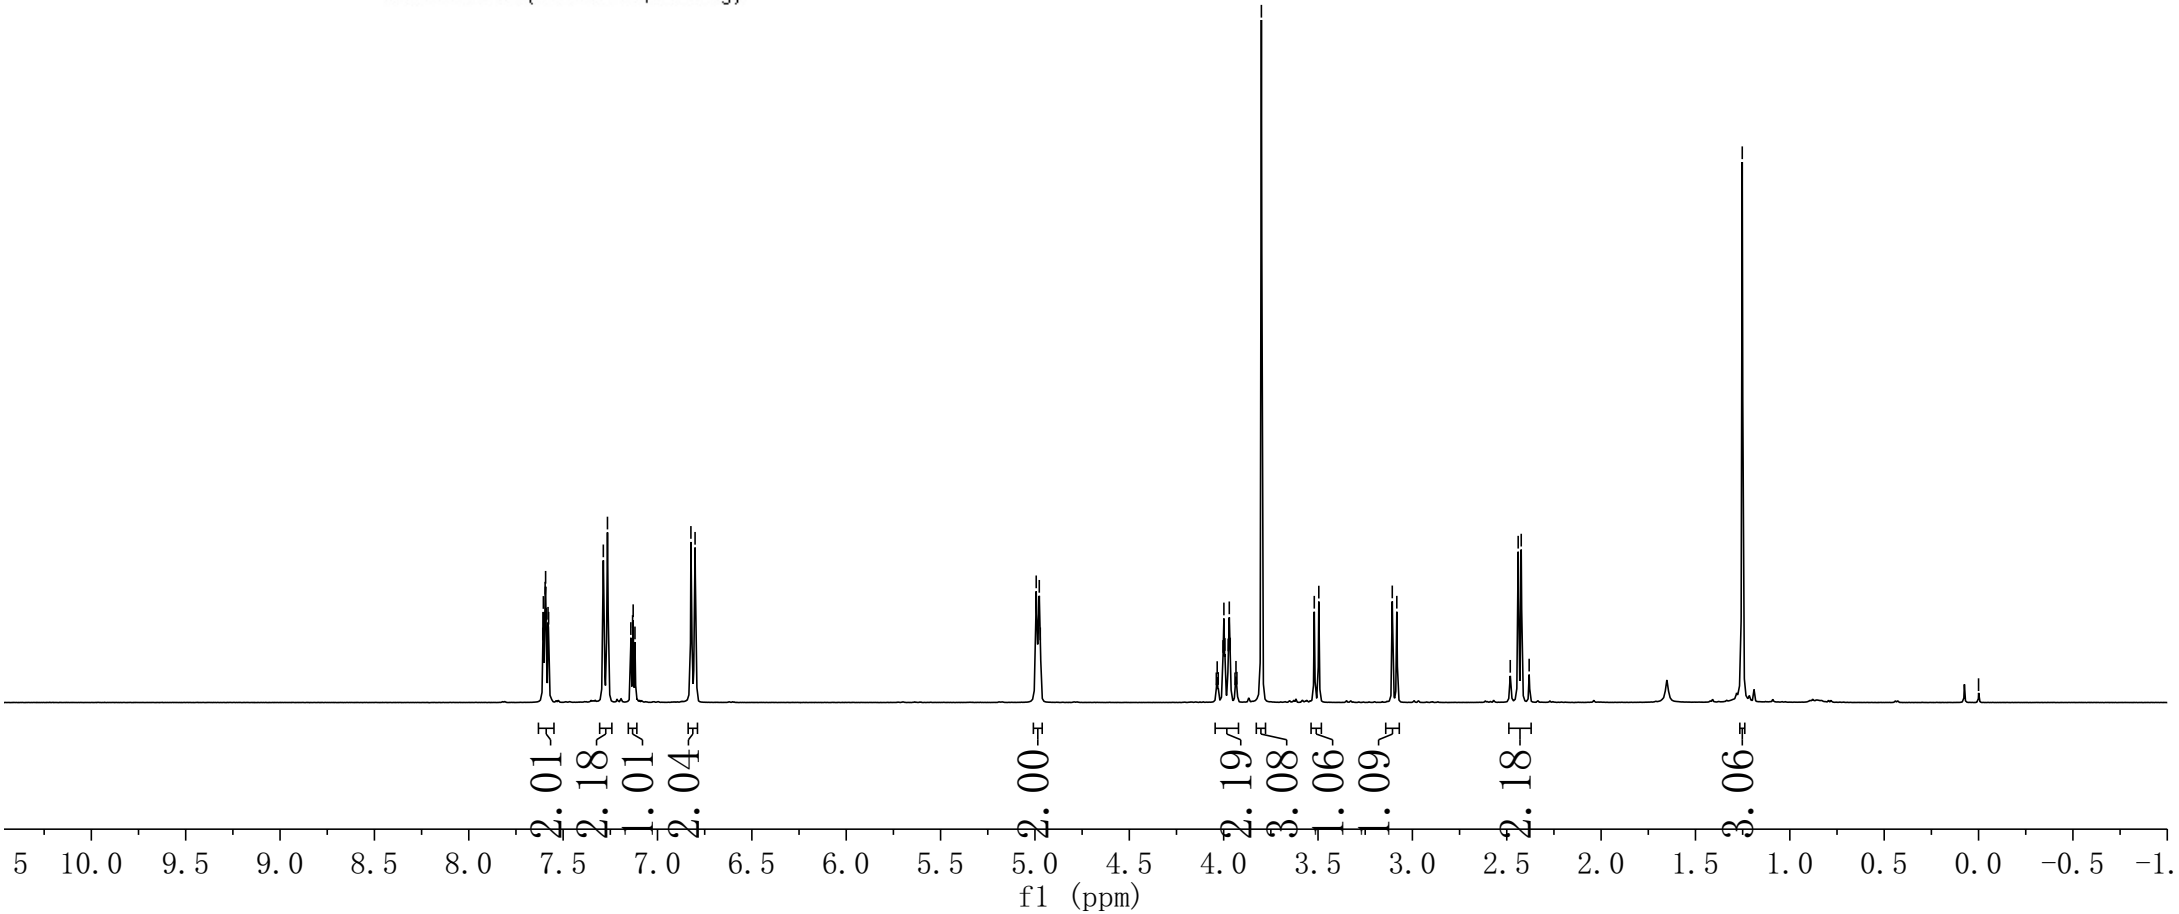

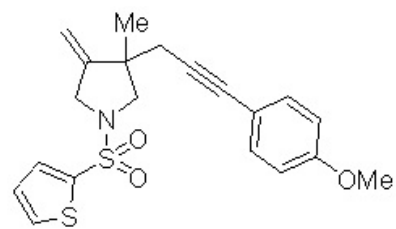

4i <sup>13</sup>C NMR (100 MHz, CDCl<sub>3</sub>)

- 159.206
- 150.279
- 135.563
- 132.880
- 132.500
- 132.011
- 127.597
- 115.383
- 113.767
- 106.695
- 84.601
- 82.427
- 77.318
- 77.000
- 76.682
- 58.809
- 55.228
- 52.426
- 45.453
- 29.972
- 23.378

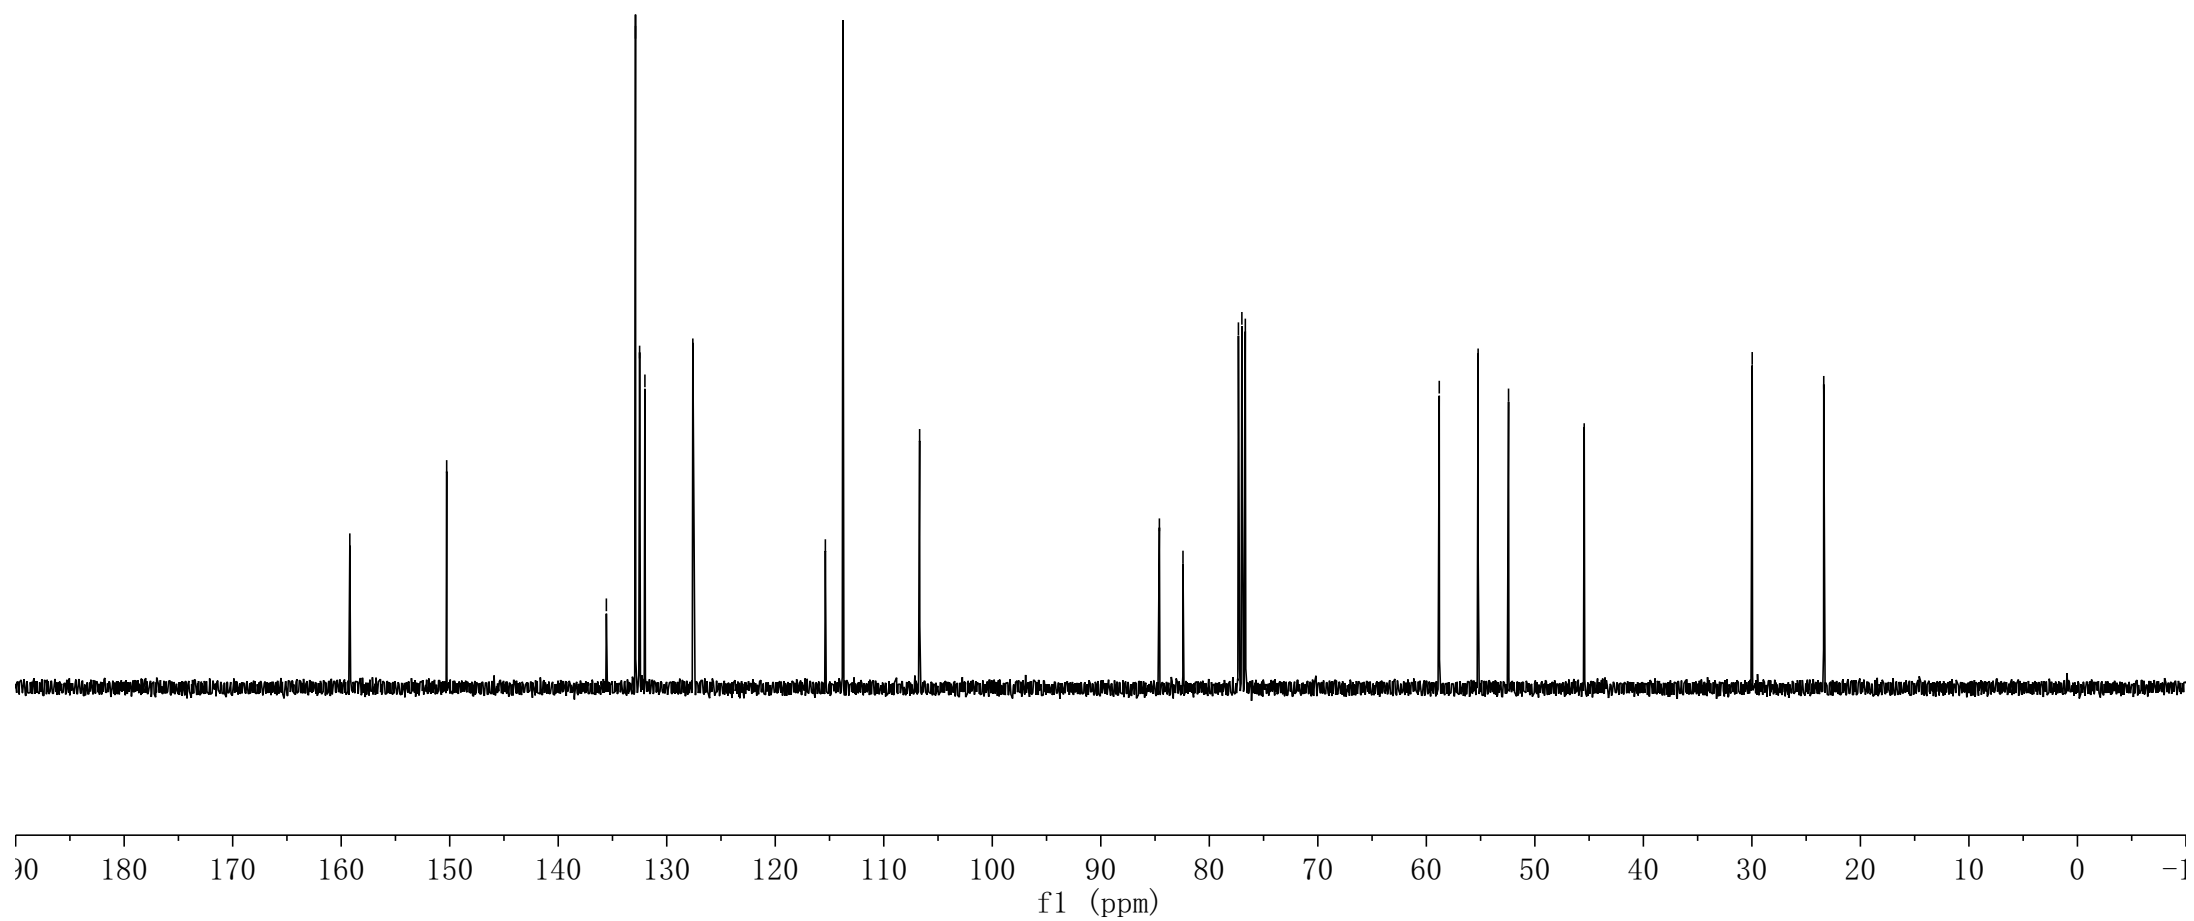

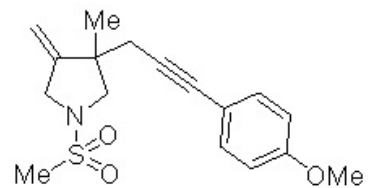

**4j**  $^1\text{H}$  NMR (400 MHz,  $\text{CDCl}_3$ )

7.326  
7.305  
7.260  
6.823  
6.802

5.056  
5.052  
4.113  
4.077  
4.060  
4.024  
3.794  
3.565  
3.541  
3.213  
3.189  
2.851  
2.617  
2.575  
2.545  
2.503  
1.340

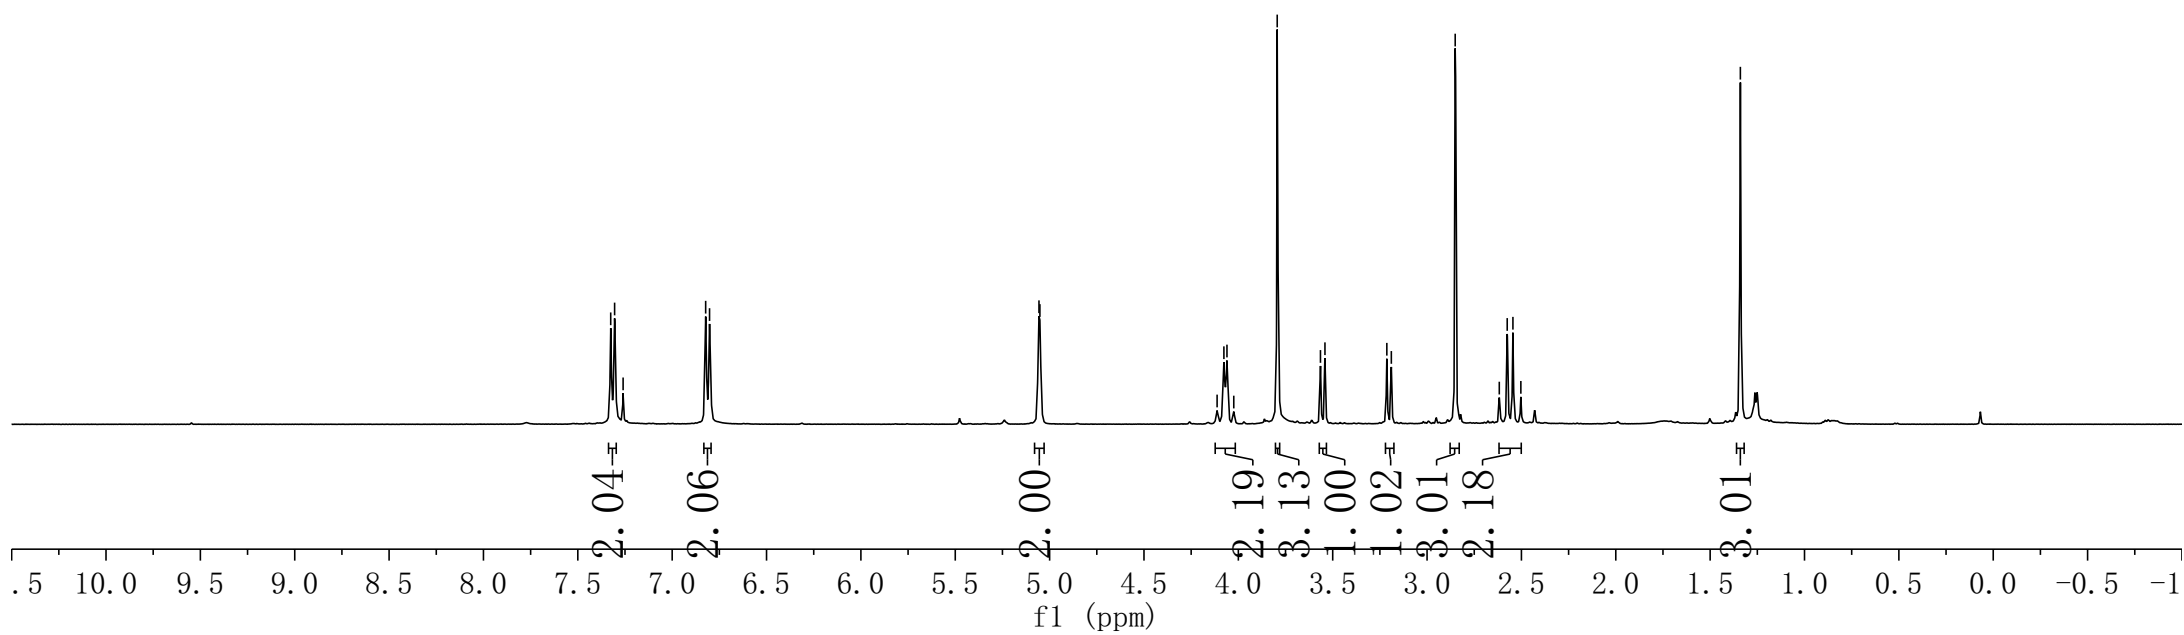

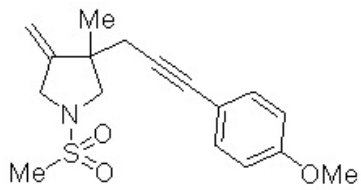

4j <sup>13</sup>C NMR (100 MHz, CDCl<sub>3</sub>)

- 159.282
- 150.601
- 132.916
- 115.376
- 113.856
- 106.792
- 84.574
- 82.535
- 77.318
- 77.000
- 76.682
- 58.657
- 55.255
- 52.191
- 45.631
- 34.732
- 30.110
- 23.386

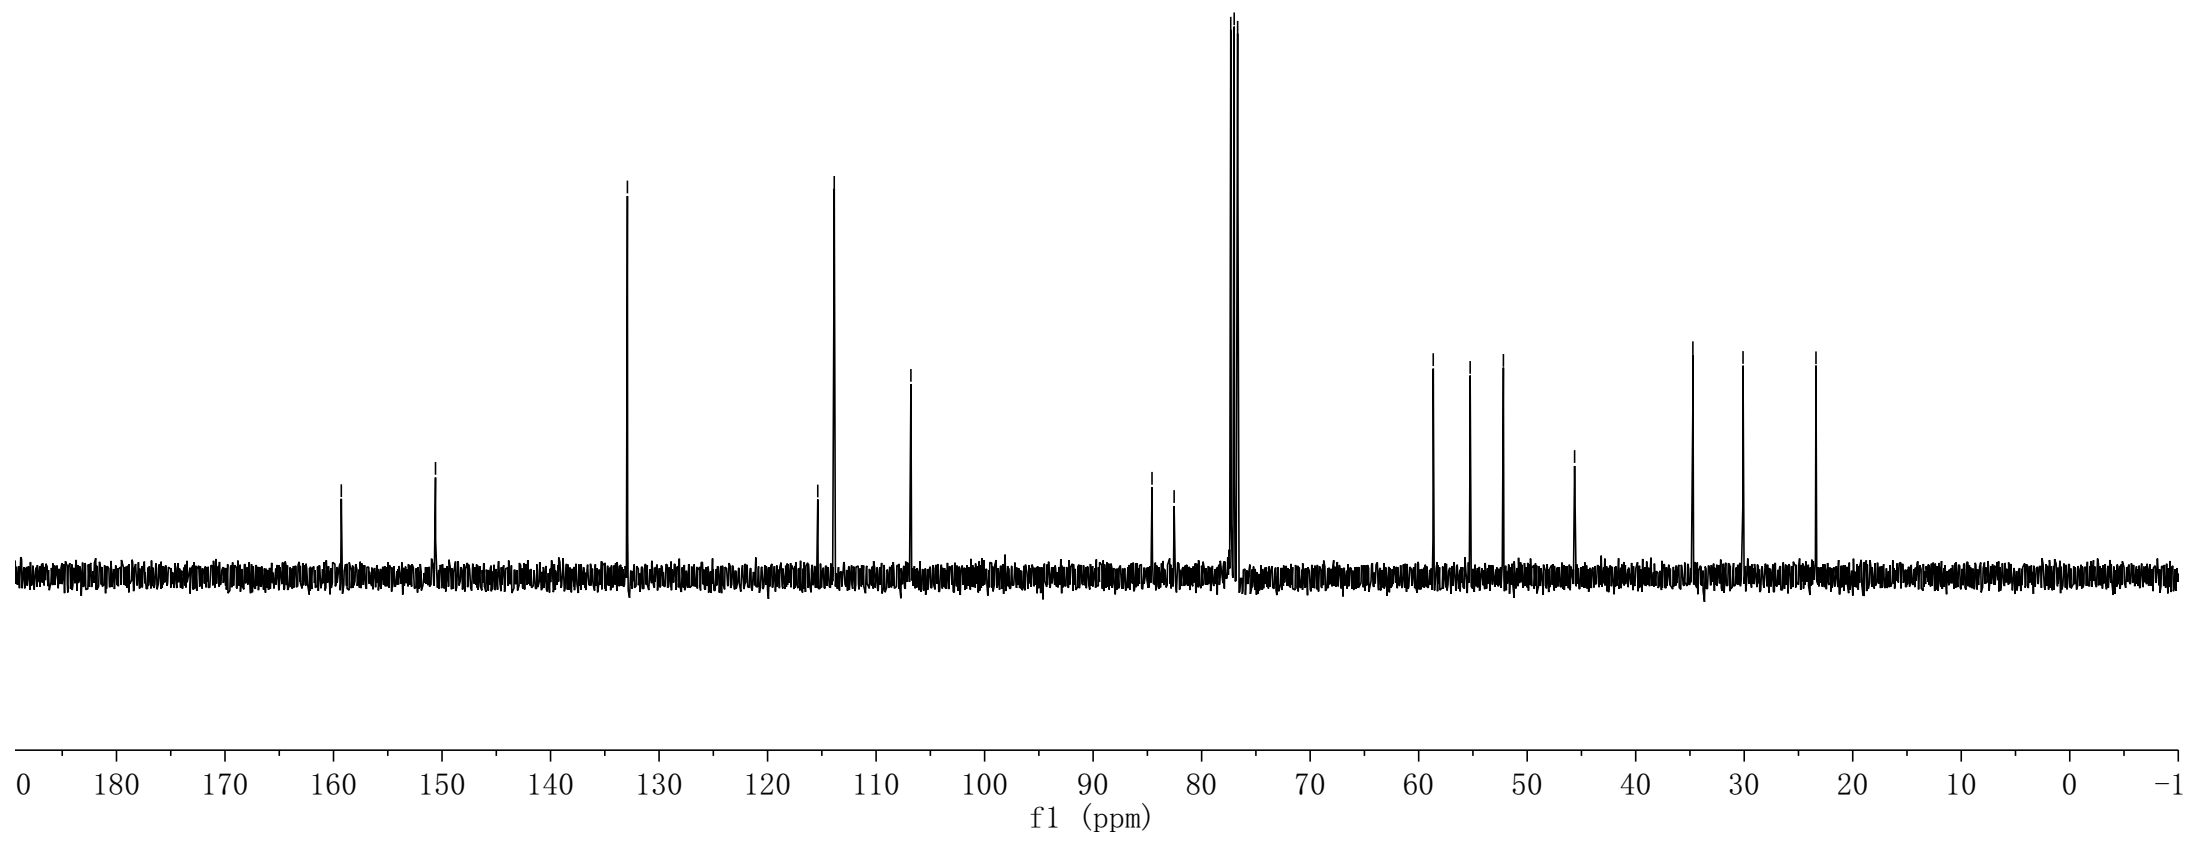

7.727  
7.707  
7.323  
7.303  
7.260  
7.256  
7.243  
7.240  
6.815  
6.793

5.027  
5.022  
5.006  
5.001

3.902  
3.867  
3.823  
3.804  
3.800  
3.588  
3.568  
3.545  
3.188  
3.172  
3.164  
3.148  
2.887  
2.873  
2.580  
2.566  
2.538  
2.524  
2.435  
2.413  
2.393  
2.379

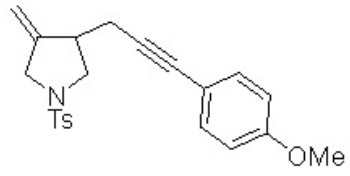

4k <sup>1</sup>H NMR (400 MHz, CDCl<sub>3</sub>)

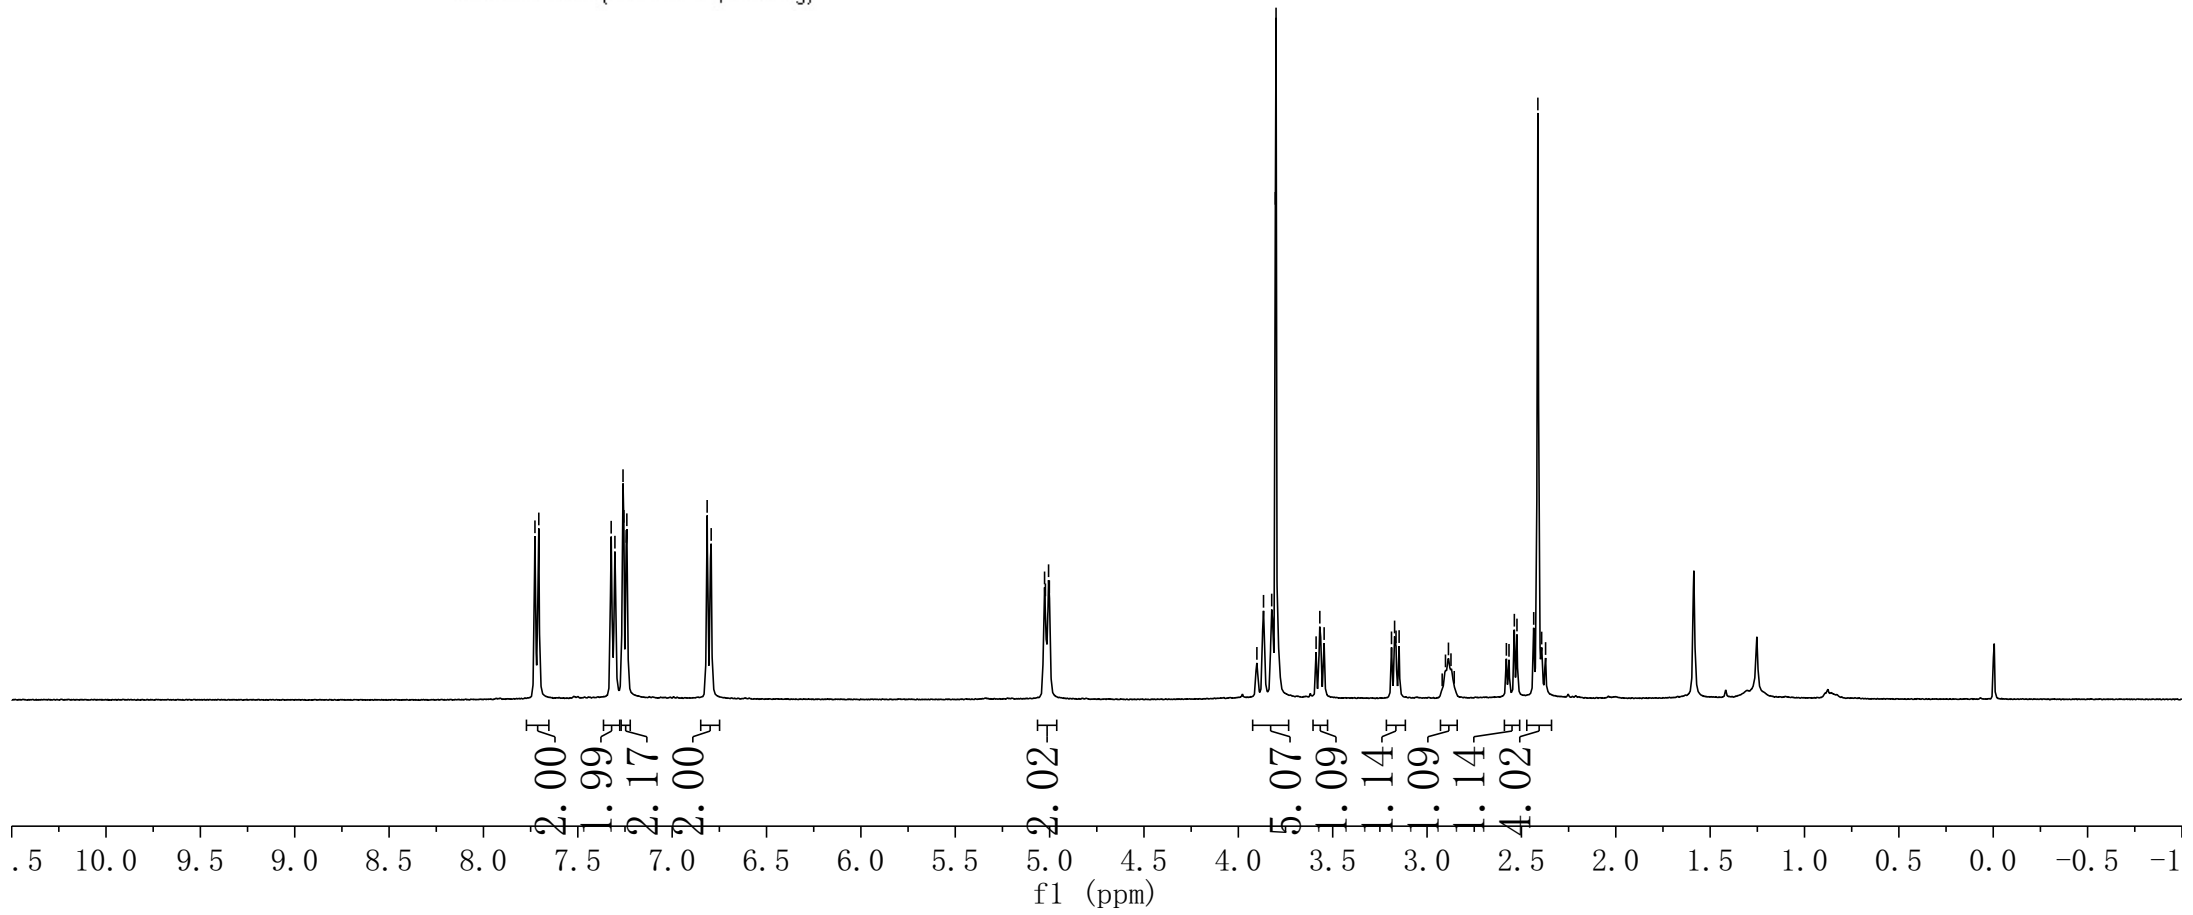

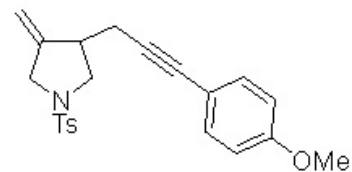

4k <sup>13</sup>C NMR (100 MHz, CDCl<sub>3</sub>)

159.269  
146.413  
143.669  
132.887  
132.515  
129.663  
127.869  
115.386  
113.823  
107.834  
85.187  
81.763  
77.318  
77.000  
76.682  
55.286  
53.003  
52.304  
42.207  
22.840  
21.547

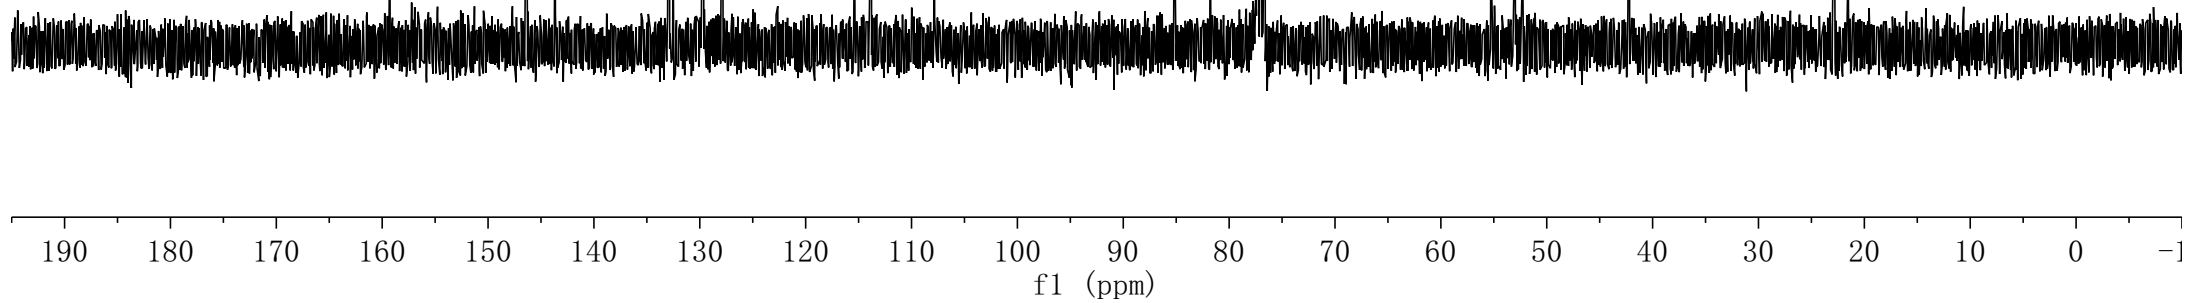



7.723  
7.702  
7.326  
7.306  
7.260  
7.166  
7.144  
6.795  
6.773  
3.802  
3.794  
3.771  
3.763  
3.727  
3.720  
3.573  
3.567  
3.549  
3.542  
3.458  
3.450  
3.442  
3.434  
3.398  
3.391  
2.613  
2.606  
2.570  
2.564  
2.470  
2.463  
2.428  
2.421  
2.389  
1.263

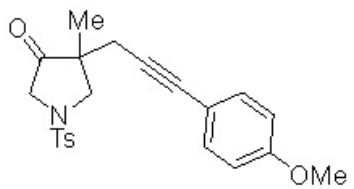

5 <sup>1</sup>H NMR (400 MHz, CDCl<sub>3</sub>)

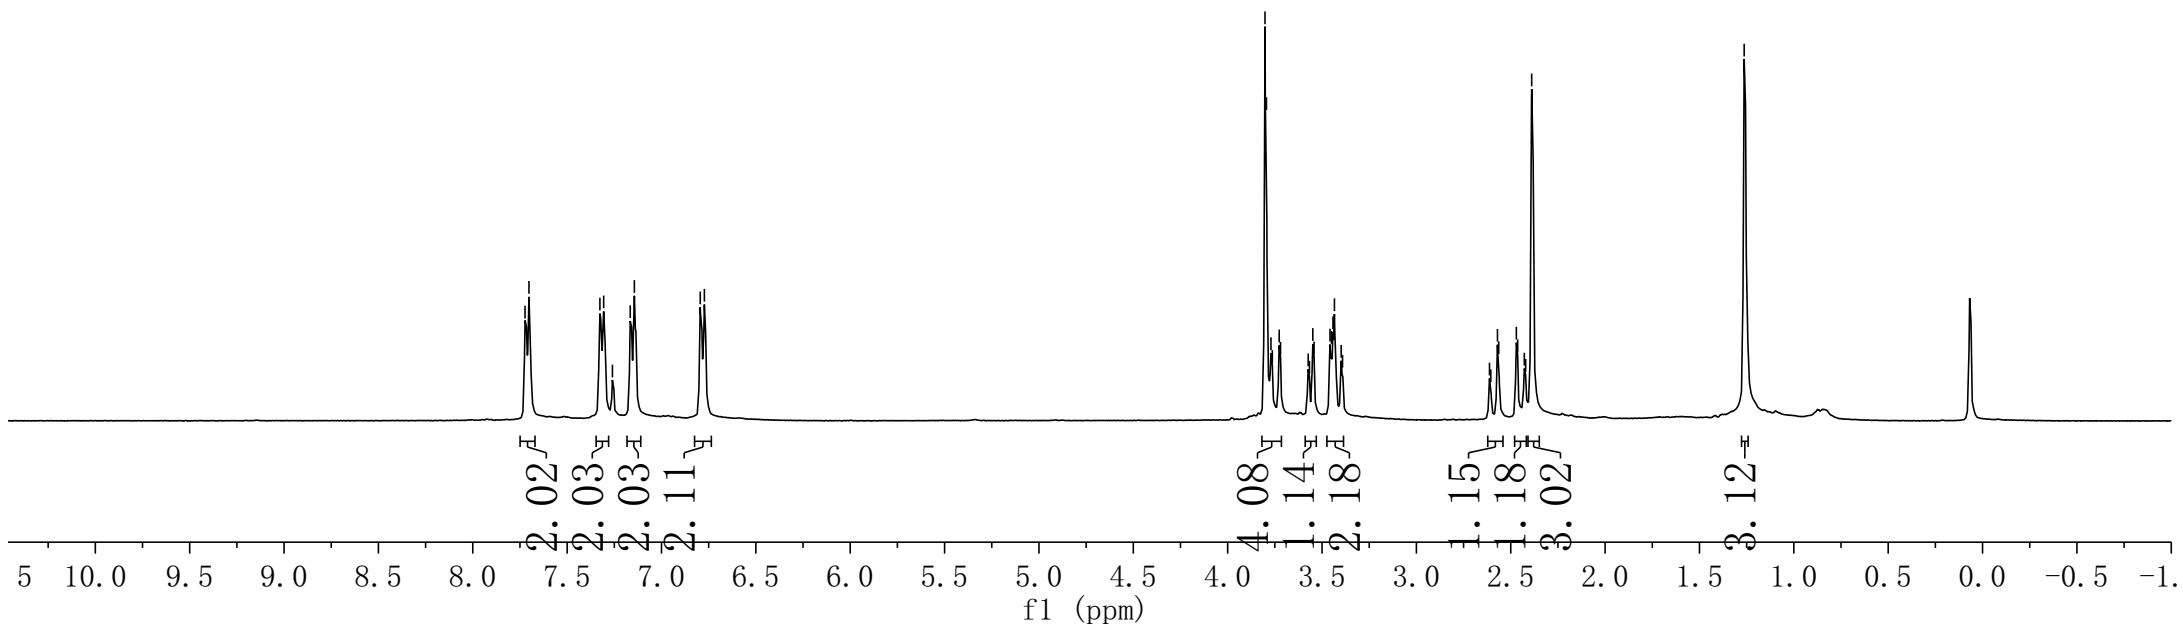

-210.857

-159.394

-144.332

132.907

131.277

129.889

127.964

114.763

113.765

83.272

82.615

77.317

77.000

76.681

55.948

55.250

53.722

49.744

25.842

21.559

20.935

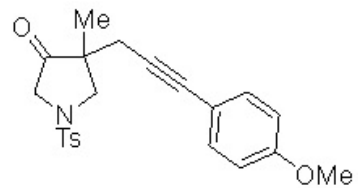

5 <sup>13</sup>C NMR (100 MHz, CDCl<sub>3</sub>)

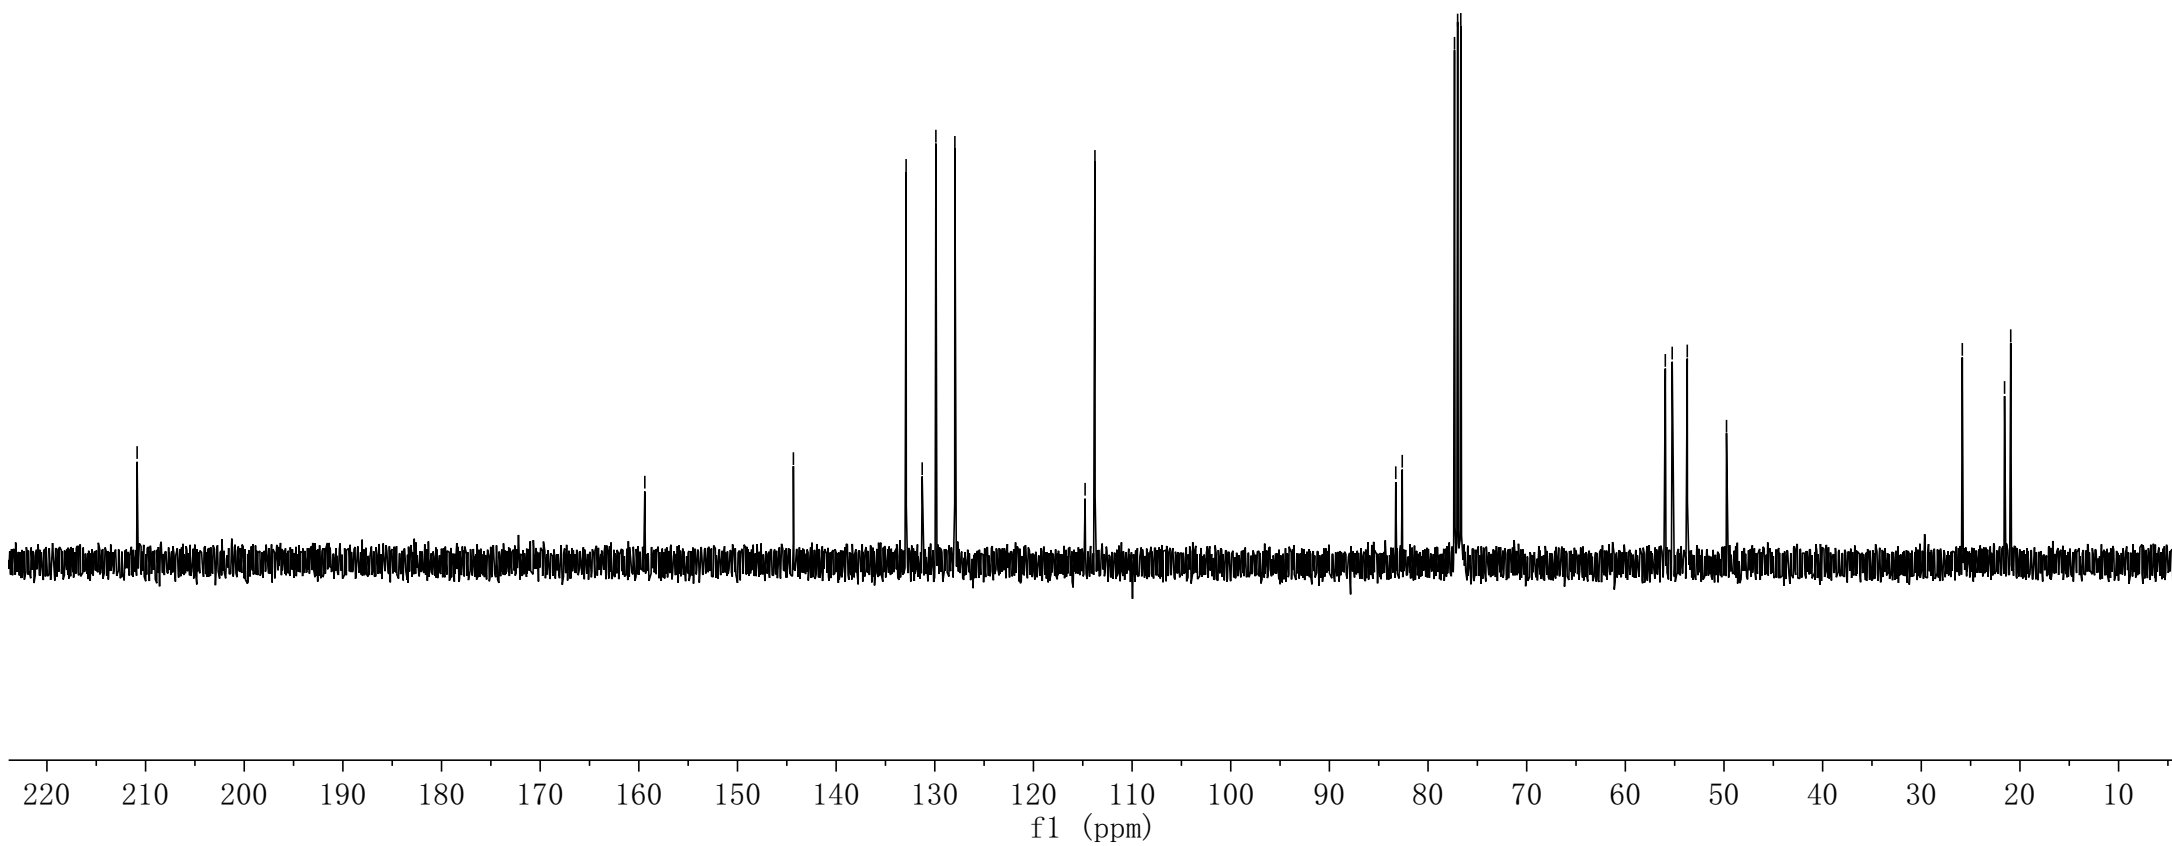

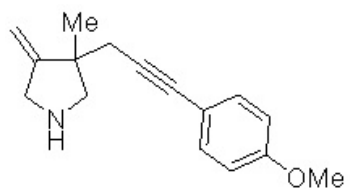

6  $^1\text{H NMR}$  (400 MHz,  $(\text{CD}_3)_2\text{SO}$ )

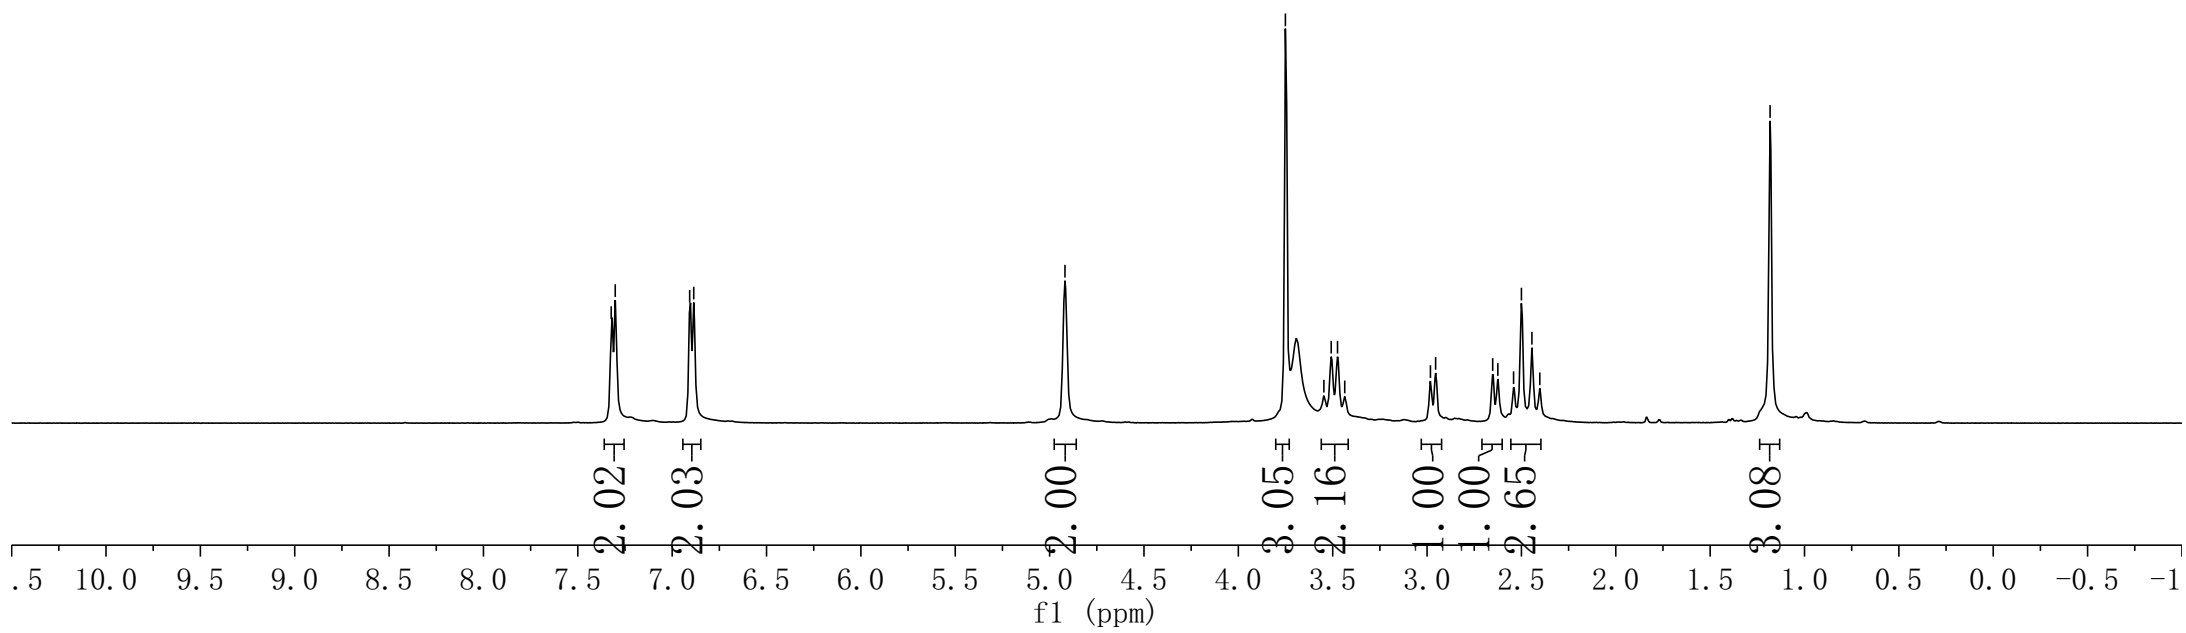

158.966  
157.159

132.734

115.258  
114.249

103.594

86.901  
81.398

58.838  
55.267  
52.092  
45.096  
40.229  
40.017  
39.809  
39.600  
39.392  
39.183  
38.978  
29.636  
23.945

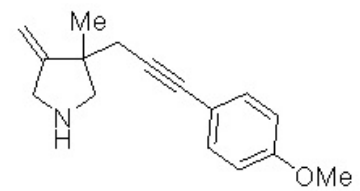

6 <sup>13</sup>C NMR (100 MHz, (CD<sub>3</sub>)<sub>2</sub>SO)

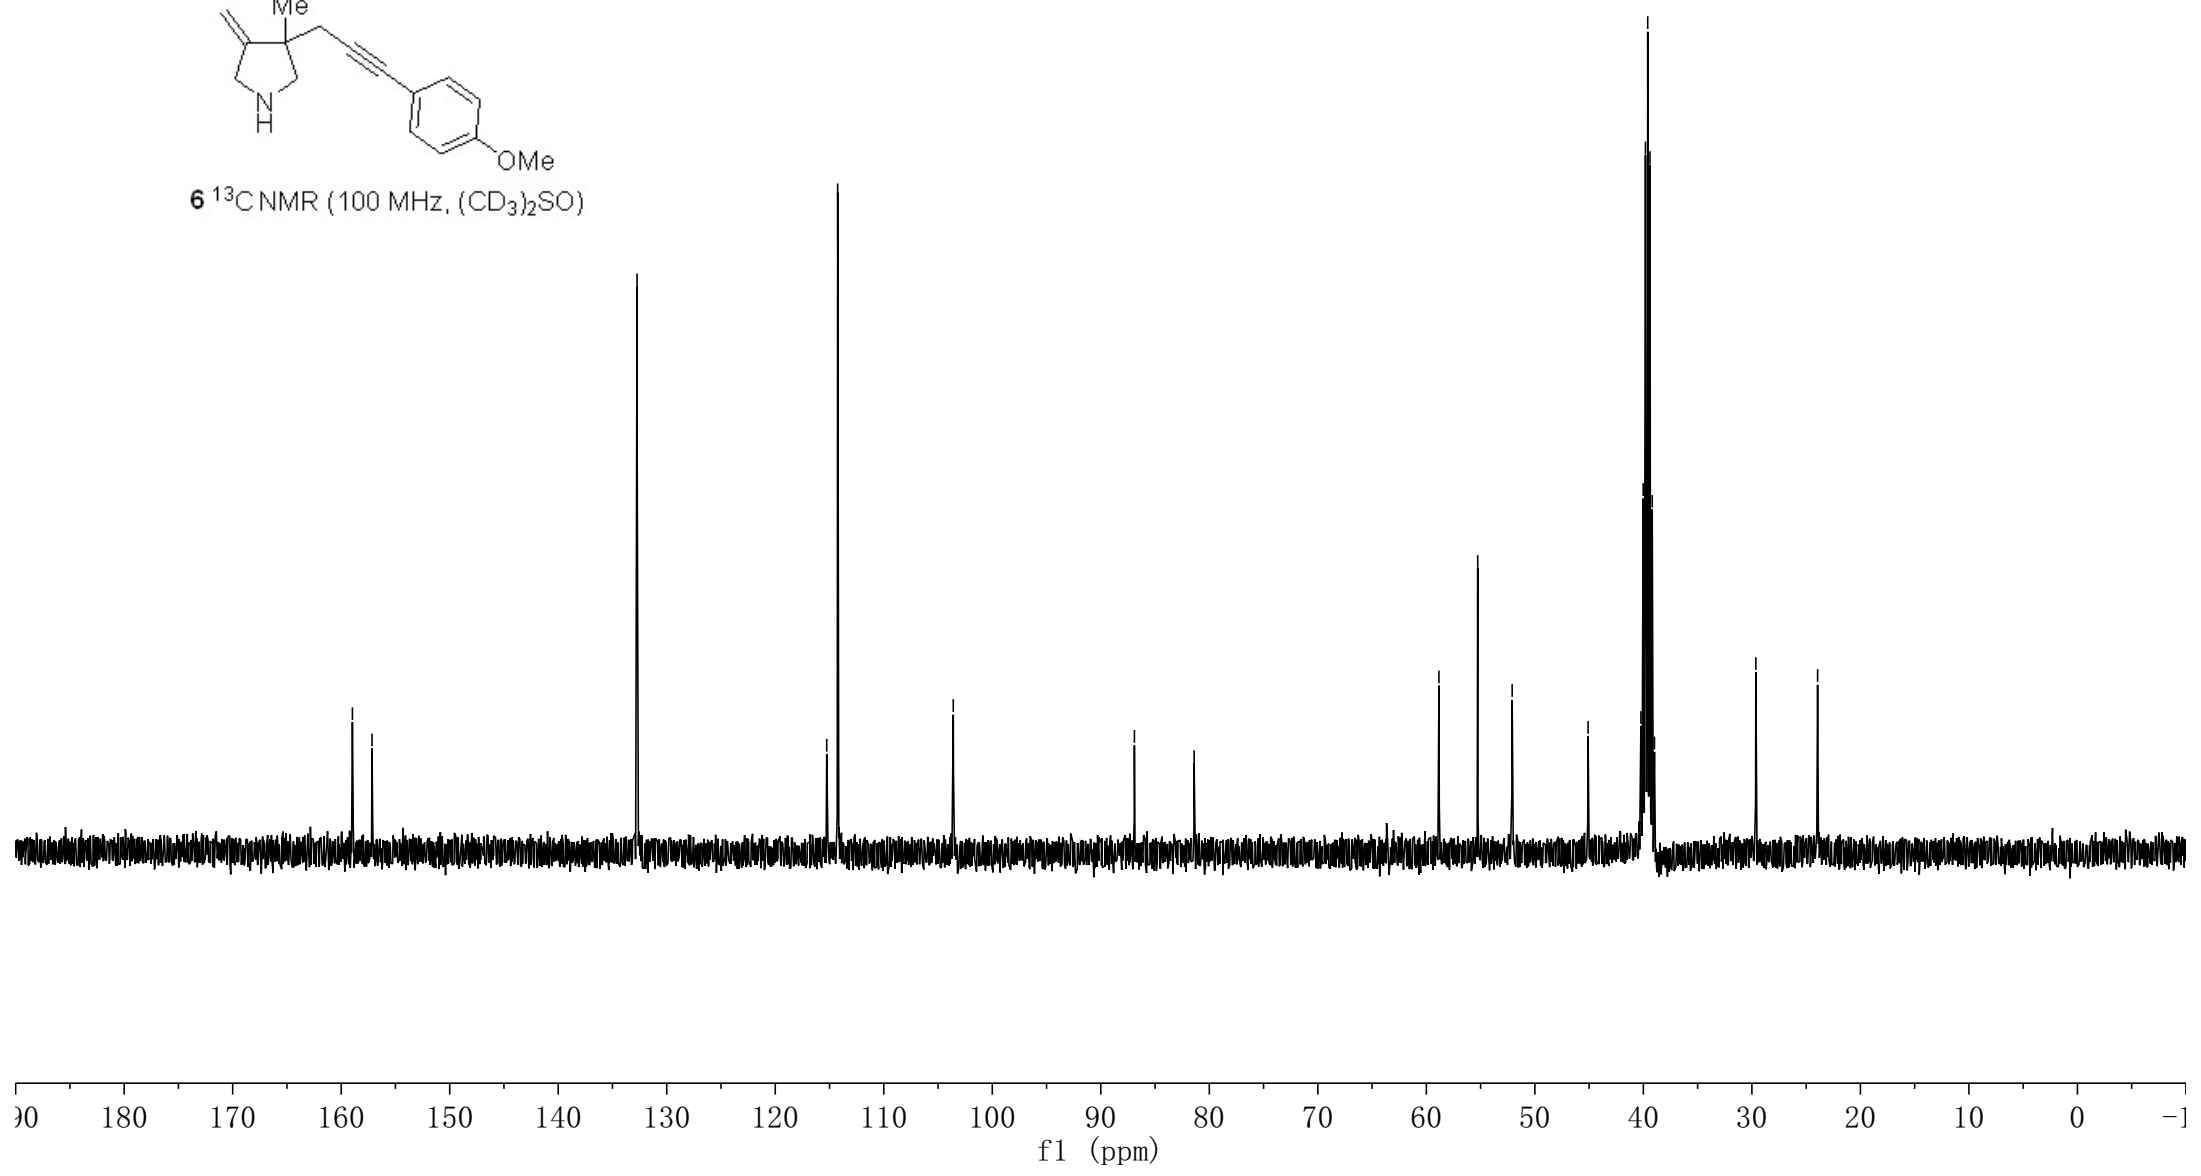

Supplement: d3ob00740e1.pdf [file d3ob00740e1.pdf]
